# Supplementary material for: Modulating the Strength and Threshold of NOTCH Oncogenic Signals by mir-181a-1/b-1
Source: PubMed Central journal article supplement (PMC3415433; doi:10.1371/journal.pgen.1002855), 2012-08-09

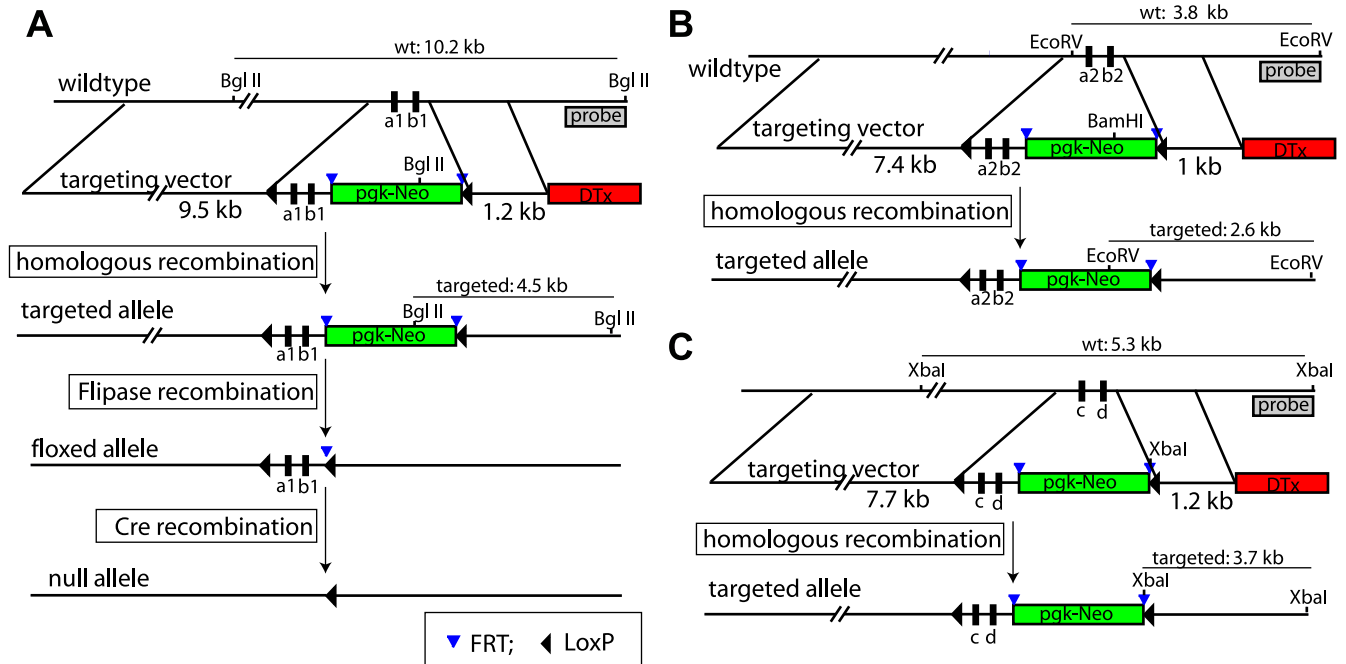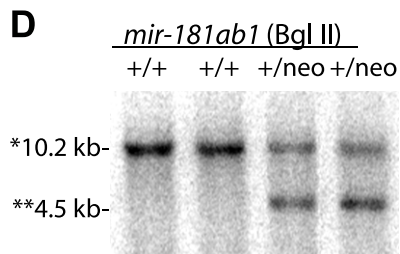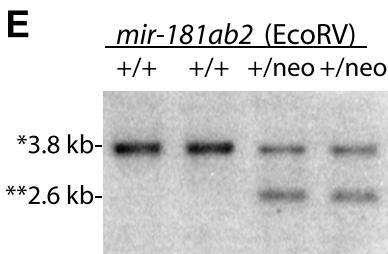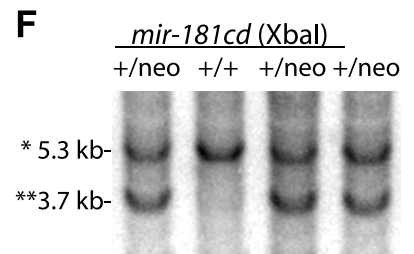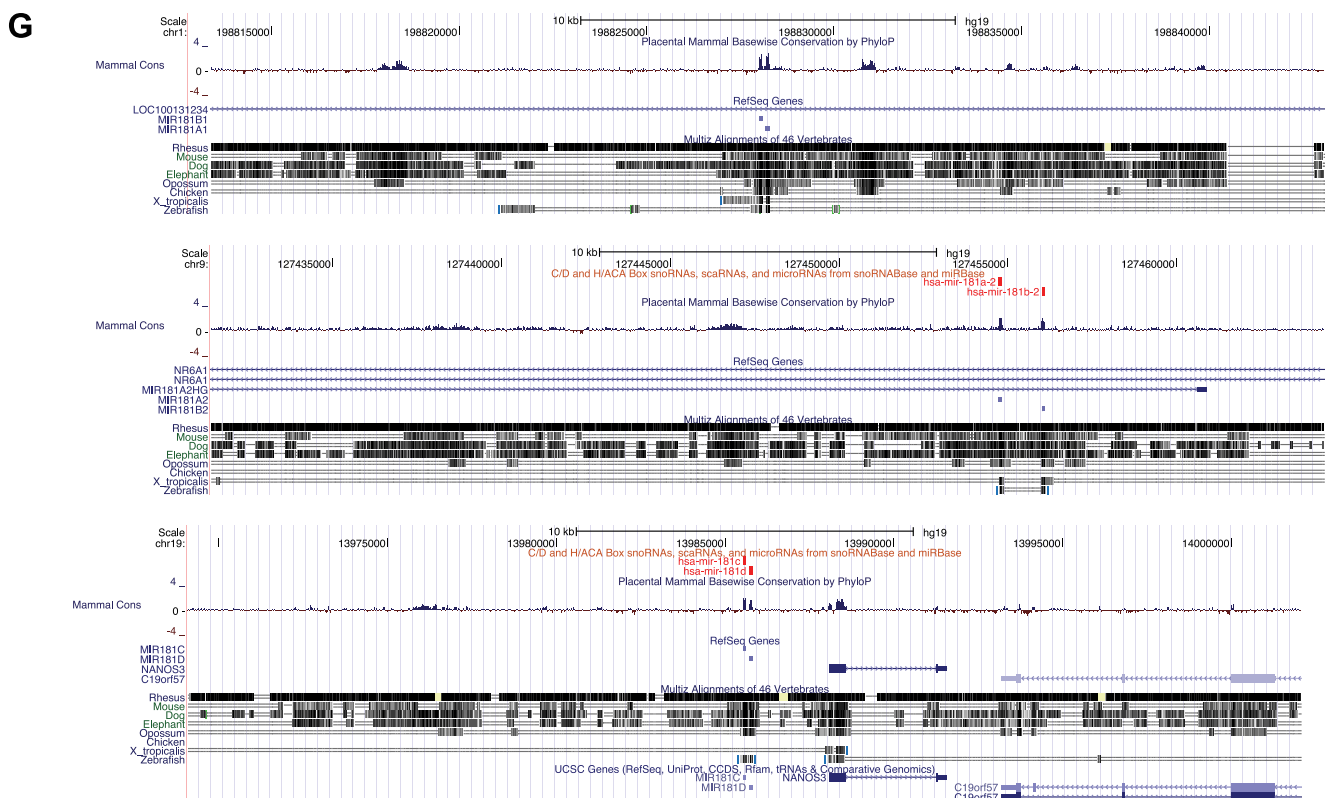

Supplement: pgen.1002855.s001.pdf [file pgen.1002855.s001.pdf]
