# Supplementary material for: Modulating the Strength and Threshold of NOTCH Oncogenic Signals by mir-181a-1/b-1
Source: PubMed Central journal article supplement (PMC3415433; doi:10.1371/journal.pgen.1002855), 2012-08-09

**A**

Putative miR-181a target sites on Numb (AK004553)

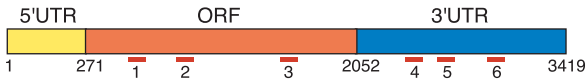

Putative miR-181a target sites on Numbl like (NM\_010950)

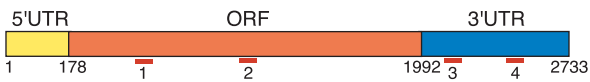

Putative miR-181a target sites on Hes6 (BC012897)

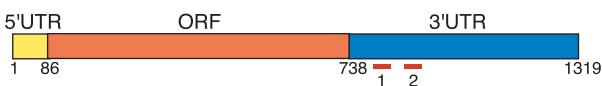

Putative miR-181a target sites on LFNG (AK004642)

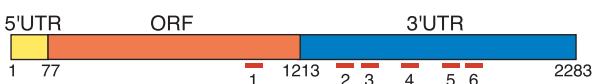**B**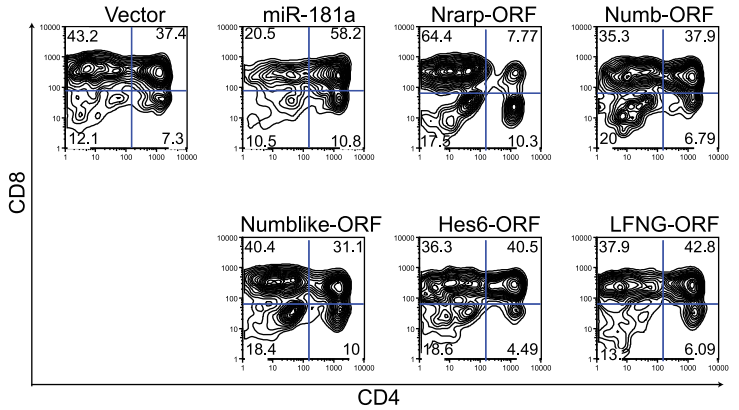**C**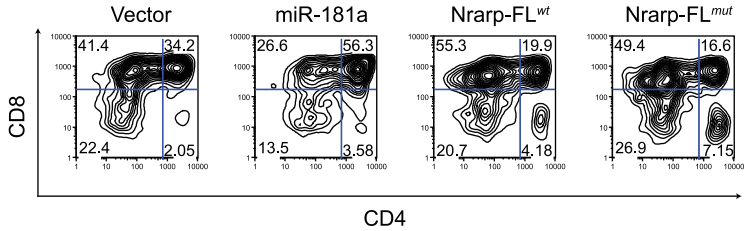**D**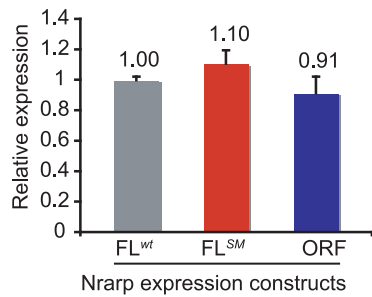**E**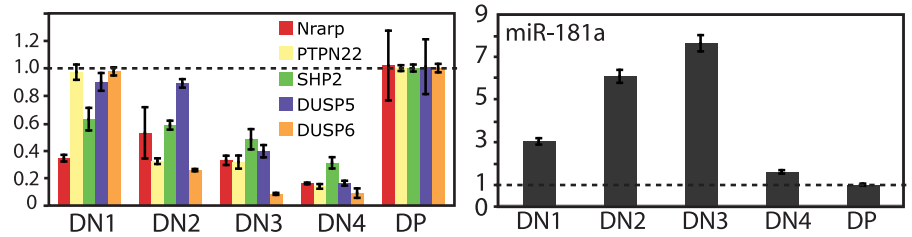**F**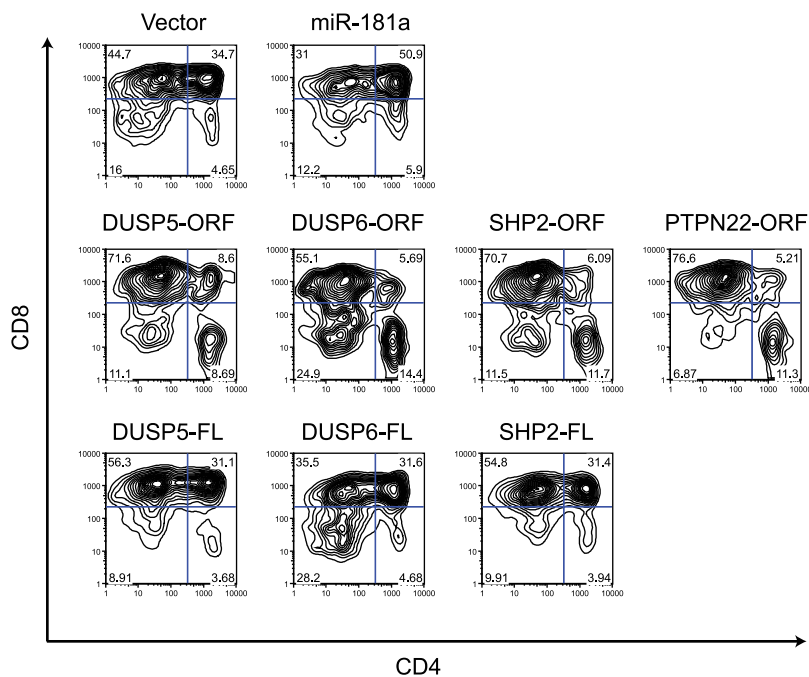

Supplement: pgen.1002855.s004.pdf [file pgen.1002855.s004.pdf]
