# Supplementary material for: Modulating the Strength and Threshold of NOTCH Oncogenic Signals by mir-181a-1/b-1
Source: PubMed Central journal article supplement (PMC3415433; doi:10.1371/journal.pgen.1002855), 2012-08-09

Dampened NOTCH and Pre-TCR signals without *mir-181ab1*

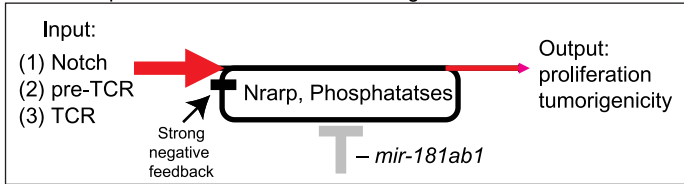

Potentiated NOTCH and Pre-TC signals with *mir-181ab1*

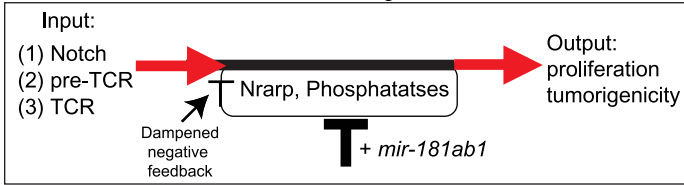

Supplement: pgen.1002855.s005.pdf [file pgen.1002855.s005.pdf]
