# Supplementary material for: Modulating the Strength and Threshold of NOTCH Oncogenic Signals by mir-181a-1/b-1
Source: PubMed Central journal article supplement (PMC3415433; doi:10.1371/journal.pgen.1002855), 2012-08-09
Supplement: pgen.1002855.s007.pdf [file pgen.1002855.s007.pdf]

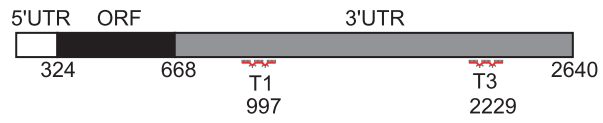

T1: 5' AUACCGGAUCUCUGCGCAAAAUGUU 3' hu\_Nrap  
 3' UGAGUGGCU--GUC-GC-AACUU-ACAA 5' miR-181a

T3: 5' ACUUGAGGACACAGGUGGGUGG 3' Nrap  
 3' UGAGUGGCUGUCGCAACUUACAA 5' miR-181a
