# Supplementary material for: Modulating the Strength and Threshold of NOTCH Oncogenic Signals by mir-181a-1/b-1
Source: PLoS Genet. 2012 Aug 9;8(8):e1002855. doi: 10.1371/journal.pgen.1002855 (PMC3415433; doi:10.1371/journal.pgen.1002855)
Supplement: Table S2 — Raw data of gene expression profiling of wild-type DP, ICN1-DP, and ICN1_DP_181KO cells. Three independent biological replicates for wild-type DP, ICN1-DP, and ICN1_DP_181KO cells were isolated by FACS sorting from control and ICN1-induced T-ALL recipient mice at 4 weeks after transplantation. Gene expression profiles of the wild-type DP, ICN1-DP, and ICN1_DP_181KO cells were determined by using the Illumina mouse Ref-8_V2 BEADCHIP array. (XLS) [file pgen.1002855.s010.xls]

## Sheet: Readme
#There are three sheets in this file:
Readme: this sheet
Raw_Data: the raw array data with "quantile" normalization or log2 transformation
Normalized_Data: the raw array data without any normalization or log based transformation

## Sheet: Raw_Data
Gene_Symbol	DP_1	DP_2	DP_3	ICN_DP_1	ICN_DP_2	ICN_DP_3	ICN_DP_Mir-181ab_null_1	ICN_DP_Mir-181ab_null_2	ICN_DP_Mir-181ab_null_3
0610005K03RIK	65.9797	57.4329	56.0399	66.379	68.8505	62.3777	33.4441	28.017	23.8522
0610006F02RIK	69.8986	64.135	61.0101	167.767	144.218	133.559	40.3337	33.851	25.8543
0610006I08RIK	1929.44	1421.85	1154.12	1962.65	2046.77	1888.96	905.817	607.035	492.249
0610006K04RIK	200.355	160.027	109.135	309.602	360.106	298.686	163.331	65.6945	70.8827
0610007C21RIK	660.864	497.574	314.766	994.353	847.327	826.293	253.186	151.113	191.943
0610007H07RIK	1011.53	845.143	616.25	1236.85	1593.77	1520.51	619.398	351.944	372.103
0610007P06RIK	911.66	800.814	673.801	970.089	1169.3	1096.93	405.674	297.609	267.594
0610007P08RIK	62.9521	95.4873	75.7156	122.867	149.345	133.104	33.5185	33.8647	30.4658
0610007P14RIK	302.111	208.476	157.807	429.594	622.528	454.113	151.389	83.3654	87.4661
0610007P22RIK	401.657	309.209	163.31	749.558	689.716	648	162.759	135.417	121.898
0610008A10RIK	71.3526	69.8162	59.9239	56.3329	72.42	65.8781	38.2886	27.4351	28.7753
0610008C08RIK	77.9257	72.84	59.6996	83.6418	72.7738	77.0256	38.3598	29.9057	24.1418
0610009B10RIK	62.427	58.4484	56.2388	68.1477	67.1977	80.5955	37.4191	28.4263	33.6182
0610009B22RIK	278.888	270.228	153.998	333.602	438.572	408.484	150.766	109.008	106.821
0610009C03RIK	73.7745	71.0593	53.3546	73.2842	78.1431	71.6539	35.1509	30.8539	27.4697
0610009D07RIK	86.0296	74.2324	62.4253	84.1364	97.7047	85.6205	41.7156	33.6759	32.5554
0610009E20RIK	1010.88	747.149	497.965	1249.68	1392.09	1207.85	567.066	377.47	304.003
0610009F02RIK	1396.48	1122.82	821.809	1057.76	1152.66	1114.22	405.612	363.436	381.489
0610009I22RIK	181.6	139.849	90.205	193.625	209.078	195.942	80.3505	69.1852	58.3664
0610009J22RIK	149.455	124.674	85.954	178.323	159.851	131.673	39.9803	42.9596	46.8556
0610009K11RIK	230.784	178.215	98.5898	592.613	592.982	505.731	99.4175	117.407	109.627
0610009M14RIK	517.834	396.106	331.252	686.433	662.246	575.316	230.728	189.609	175.836
0610009O03RIK	253.053	200.434	134.111	276.843	303.582	283.553	103.025	100.237	90.7925
0610009O20RIK	224.755	217.166	142.115	252.542	244.559	252.574	88.3172	64.9903	67.4508
0610010D20RIK	69.6413	62.5147	54.3172	81.3051	83.5676	85.4779	33.8745	28.4119	27.1897
0610010D24RIK	96.8073	75.3561	59.8607	125.478	121.085	125.723	47.9818	46.5127	39.4242
0610010E21RIK	329.94	213.559	159.574	719.106	617.721	641.216	166.345	99.2948	94.0765
0610010K06RIK	2334.2	1571.41	1206.27	1764.45	1722.02	1314.34	511.923	599.5	534.596
0610010K14RIK	330.276	295.17	251.8	403.602	512.55	429.797	154.527	116.626	104
0610011B16RIK	87.8287	72.5171	73.6233	214.879	178.404	153.688	43.166	35.9955	34.3322
0610011L14RIK	69.2425	66.0352	62.3593	85.0724	85.1325	93.4401	36.7588	29.9266	31.0832
0610011N22RIK	232.39	227.813	151.327	249.529	255.21	235.563	111.709	89.0697	88.5774
0610012A05RIK	60.963	53.5418	55.1552	68.1529	66.087	66.2391	31.3376	27.0348	23.1148
0610012A11RIK	65.823	66.7833	61.6734	69.9478	71.1653	86.4783	39.6865	33.1537	33.821
0610012C01RIK	76.6101	68.3298	57.0172	75.0662	78.3918	81.1382	29.8876	31.8571	32.2871
0610012D14RIK	60.0043	60.6922	55.8338	76.0755	80.6283	77.0161	31.834	28.2513	26.5664
0610012D17RIK	173.277	155.806	112.685	210.72	191.598	161.442	85.2854	65.5757	55.766
0610012G03RIK	572.075	498.097	291.756	1597.62	1644.99	1671.1	377.131	305.906	254.422
0610012H03RIK	65.9523	67.8602	54.3481	77.257	81.8625	79.1869	32.7511	27.4792	24.0743
0610012K18RIK	109.576	87.1384	100.507	135.384	114.438	125.769	41.3164	39.0694	38.4511
0610013E23RIK	62.4699	54.8091	73.4719	89.4455	89.9551	72.4044	25.3562	30.3642	29.712
0610025L06RIK	341.925	274.885	184.907	457.728	399.938	333.397	130.832	109.798	114.208
0610025O11RIK	75.0148	71.409	52.384	58.2396	70.2161	68.1541	34.7997	26.5991	31.4749
0610025P10RIK	125.509	132.675	91.4318	155.017	168.371	163.682	55.6178	58.497	48.3666
0610027B03RIK	71.3081	67.9904	55.2784	79.9619	79.9487	91.575	38.0757	28.0189	28.4704
0610027O18RIK	293.524	281.437	185.586	444.202	431.482	392.618	102.944	75.1935	74.9915
0610030H11RIK	150.459	97.9205	82.3529	108.801	121.621	121.666	50.4996	40.6208	42.2939
0610031J06RIK	304.64	241.148	150.238	607.469	543.64	485.964	163.802	120.357	123.702
0610033E06RIK	54.6624	54.1289	50.3063	57.6598	58.9625	57.85	32.5339	24.4797	28.7961
0610033H09RIK	1302.6	1031.54	798.427	1681.91	2015.67	1972.87	1192.34	506.143	571.901
0610034P02RIK	121.429	118.225	95.386	98.6563	129.825	136.284	42.9078	44.4983	45.6486
0610037D15RIK	106.135	102.033	77.9447	122.057	163.283	143.62	47.6437	41.9416	46.2625
0610037H22RIK	73.8898	67.5727	56.2939	79.209	78.4553	85.7636	45.0742	28.5075	33.1488
0610037L13RIK	242.876	200.683	141.464	287.468	346.794	298.924	95.3653	82.8236	86.3827
0610037P05RIK	63.6	71.2702	57.4741	61.5031	69.5173	63.6869	34.0529	27.1878	26.3238
0610038F07RIK	300.204	321.451	195.203	485.251	478.025	401.288	156.64	116.745	127.34
0610038K03RIK	79.2099	77.1195	64.0091	71.4036	81.658	84.6154	36.4015	30.0339	33.0435
0610039D01RIK	685.438	540.074	414.446	884.317	960.168	842.51	376.451	297.592	265.798
0610039J04RIK	234.935	248.621	178.528	278.797	321.361	321.143	85.2233	84.6982	80.1386
0610039N19RIK	123.115	104.308	72.5981	131.322	144.256	130.593	64.4899	44.5889	41.4886
0610039P13RIK	174.552	165.984	96.9009	354.1	340.831	329.161	122.707	49.7479	59.6585
0610040B21RIK	517.468	455.257	298.331	1550	1693.42	1423.42	481.019	210.061	257.185
0610040D20RIK	65.584	61.4136	52.8579	57.693	58.4209	61.8997	32.6516	23.5482	27.2072
0610040J01RIK	59.4432	70.427	56.4036	90.2717	74.4068	75.8761	31.2734	27.1659	28.9466
0610041B22RIK	343.229	230.48	152.807	1267.09	1210.06	1072.33	188.147	198.823	196.693
0610041E09RIK	265.941	250.321	180.888	213.6	290.853	222.369	119.472	78.5264	92.5678
0610041G09RIK	62.8906	53.67	54.6229	101.098	77.2898	76.3918	44.0104	26.7439	27.7282
0610042E07RIK	59.1252	60.8194	53.9527	85.6784	90.1986	90.1563	38.2573	25.4811	35.2131
0710001B24RIK	184.958	132.992	108.168	149.945	149.139	133.327	65.2182	48.7909	47.9646
0710001E13RIK	1007.16	946.944	628.381	1228.31	826.193	869.159	283.168	311.802	314.796
0710005M24RIK	68.8195	65.5377	55.6938	67.0664	60.5191	67.0172	30.6382	25.9721	27.9449
0710007A14RIK	1352.44	1318.53	908.412	1532.61	1535.65	1382.2	513.151	442.505	424.112
0710008K08RIK	970.982	911.852	652.023	1031.07	1020.21	1017.62	424.541	338.027	355.096
0910001A06RIK	118.117	114.616	78.4273	211.214	207.435	180.399	42.1979	38.9545	47.8058
0910001K20RIK	60.5299	74.7184	61.5149	68.2315	71.1648	67.5884	33.2557	27.7916	32.4768
0910001L09RIK	2540.13	1898.35	965.344	2236.09	2048.58	2076.52	865.04	679.098	576.444
1010001D01RIK	59.7675	54.5225	65.4875	64.0356	73.17	70.3352	37.1715	28.0805	28.3208
1100001A21RIK	221.869	141.998	106.844	382.193	338.503	310.035	82.4564	70.7116	72.3581
1100001D10RIK	1038.69	841.616	373.153	1540.34	1594.11	1319.1	501.337	404.302	341.927
1100001E04RIK	63.0343	65.4078	63.9554	74.789	85.9635	72.4494	36.232	31.888	27.7445
1100001G20RIK	65.7132	77.5383	53.9058	531.428	262.162	334.556	48.9235	29.1917	24.8496
1100001H23RIK	68.4039	66.6459	67.6112	88.7643	86.7637	75.7201	36.4378	29.2026	30.9465
1100001I19RIK	61.8638	56.6559	61.1326	63.9348	65.6264	63.206	26.6155	22.578	22.4381
1100001I22RIK	3991.18	3358.11	1776.63	5976.52	7471.92	6440.39	2913.49	1901.25	1813.76
1110001A05RIK	104.242	83.7064	67.0811	166.222	152.164	137.729	46.1436	32.8227	36.5797
1110001A07RIK	201.544	184.354	126.055	195.639	296.396	246.267	128.631	95.6668	94.5518
1110001A12RIK	543.98	409.55	222.69	3013.31	3174.68	2781.92	400.178	309.334	249.922
1110001A23RIK	137.716	120.998	99.6814	198.004	173.449	180.105	86.5639	43.1403	55.771
1110001C20RIK	390.893	296.932	124.475	325.324	311.029	286.623	94.634	102.054	77.4152
1110001E17RIK	97.7958	84.2109	69.9553	127.803	101.451	100.463	33.4003	42.0656	30.0662
1110001J03RIK	157.036	126.57	80.5774	567.93	721.845	696.67	151.258	87.5758	104.403
1110001K21RIK	1192.1	962.777	556.472	2199.43	2339.23	2002.97	707.254	394.62	412.228
1110002B05RIK	1239.7	1199.31	833.796	2538.78	2814.72	2479.93	1045.76	702.513	696.255
1110002E23RIK	318.706	309.421	270.137	324.455	334.797	292.405	104.938	85.6805	87.7645
1110002H13RIK	66.1364	53.4644	54.1371	70.8574	66.6907	68.5954	32.6285	28.7941	25.7078
1110002N22RIK	200.085	151.214	104.443	234.809	215.049	243.161	82.032	46.8242	52.0278
1110003A17RIK	932.602	1235.54	952.539	1686.78	1271.44	1086.31	276.844	476.184	390.44
1110003E01RIK	1649.9	1308.64	734.292	2806.28	2307.88	2010.1	974.766	605.75	598.948
1110004B13RIK	85.1158	75.0318	65.7332	92.4402	112.744	95.563	43.389	32.924	36.293
1110004B15RIK	99.4224	116.276	75.3508	152.183	218.943	135.007	60.2459	48.2804	39.0664
1110004E09RIK	78.8063	74.303	60.8252	80.4797	88.7987	80.2963	42.8255	33.4695	29.506
1110004F10RIK	82.3439	76.6595	62.1103	88.0029	89.0998	95.8825	39.5866	30.305	28.0979
1110005A03RIK	117.908	89.423	67.0035	190.831	336.494	221.387	62.8762	46.474	50.0792
1110005A23RIK	150.53	160.106	75.902	665.813	677.125	654.927	160.177	91.2163	97.5004
1110006G06RIK	152.869	139.874	83.59	192.984	200.921	211.944	63.7942	57.5064	52.2303
1110006I15RIK	526.179	320.291	196.6	1234.66	1376.58	1358.5	321.246	196.404	226.405
1110007A06RIK	231.3	175.21	109.264	521.038	393.534	378.992	51.6032	69.6813	61.0122
1110007A13RIK	479.49	379.916	274.729	667.296	698.723	640.951	165.463	154.438	177.618
1110007C02RIK	70.9414	72.4558	50.3353	140.714	98.812	94.2938	39.1135	30.6957	33.5044
1110007C05RIK	238.717	171.342	171.848	309.723	289.421	334.988	176.596	69.605	68.0794
1110007C09RIK	73.9263	82.781	71.021	75.0866	74.2105	68.891	36.2876	28.2837	28.1823
1110007C24RIK	1210.3	859.358	542.214	1136.16	1142.83	901.189	278.902	383.142	283.428
1110007F05RIK	72.059	64.8757	56.9751	79.32	74.4581	85.5527	36.9236	25.9643	28.9775
1110007F12RIK	61.5643	73.2232	59.1692	89.0685	82.8115	87.008	34.1744	25.8443	32.3416
1110007H17RIK	67.3308	61.1688	54.8375	73.5233	69.6952	69.0722	28.8918	22.1246	27.4794
1110007L15RIK	571.196	420.972	302.932	901.291	958.785	834.152	297.242	221.968	222.896
1110007M04RIK	352.773	371.26	243.177	549.879	777.608	796.634	133.812	100.763	92.5673
1110008F13RIK	356.594	226.88	127.977	721.503	741.223	637.151	185.223	172.199	144.093
1110008J03RIK	85.3839	77.6694	65.5912	86.7954	93.1946	92.3748	36.5441	33.6414	33.3724
1110008K04RIK	78.6685	64.0473	60.9235	73.1445	76.3317	73.5101	31.312	28.0061	27.5617
1110008P14RIK	550.848	428.396	325.276	1374.14	1066.78	937.086	250.873	159.992	123.192
1110011D13RIK	53.3292	55.0915	54.0237	62.2097	70.9409	59.4452	32.5629	24.6584	29.1436
1110011K10RIK	394.916	238.154	169.172	596.781	828.807	677.849	209.694	124.048	125.427
1110012D08RIK	192.783	149.532	123.602	223.487	192.962	173.36	50.803	58.1164	61.2864
1110012E06RIK	101.857	114.834	74.7562	220.393	204.768	178.304	58.1592	58.5511	50.8415
1110012J17RIK	69.0067	56.8475	56.405	82.0648	82.2293	84.9258	46.9343	36.578	29.3649
1110012L19RIK	181.775	130.47	99.3719	231.199	236.223	207.356	83.0293	60.8911	57.2595
1110012M11RIK	503.201	365.26	253.487	1325.99	1448.34	1154.42	629.389	273.974	320.043
1110013L07RIK	319.878	202.797	145.142	447.578	427.77	415.351	149.486	92.4221	121.154
1110014D18RIK	314.82	276.409	234.715	415.132	512.328	455.342	175.865	114.684	131.415
1110014J01RIK	86.7054	74.8343	59.5133	74.6828	72.2917	77.8315	31.8141	27.3595	24.5271
1110014K05RIK	97.1404	82.3608	70.1657	97.4728	101.078	105.739	45.2529	37.3026	33.1945
1110014L17RIK	283.758	239.968	185.578	323.828	319.423	314.859	136.92	93.254	106.36
1110014P06RIK	64.1662	79.186	58.935	86.8651	92.3122	96.867	43.4345	34.5245	37.5693
1110015K06RIK	1184.8	976.987	480.247	1627.24	1544.27	1320.47	506.434	349.665	413.098
1110017D15RIK	135.767	103.91	70.6515	109.708	144.817	122.917	39.9335	35.2155	37.1249
1110017I16RIK	73.6662	60.7775	58.5963	59.2873	74.5177	64.0602	33.6278	24.7351	24.7494
1110017O22RIK	356.188	401.826	143.966	1492.99	1686.75	1228.12	324.234	208.348	170.384
1110018G07RIK	903.708	716.729	414.063	1537.33	1311.22	1194.18	302.634	257.524	238.449
1110018J12RIK	79.7704	68.9153	61.3951	67.5795	79.287	72.6016	31.6523	27.4252	24.8252
1110018J18RIK	96.7009	103.347	68.5932	108.02	111.568	105.453	57.1911	40.3518	38.7385
1110018M03RIK	72.7575	58.6029	56.4408	60.0924	71.9904	61.768	35.6279	26.5124	26.7882
1110019C08RIK	189.811	190.663	87.3408	218.649	246.073	225.686	85.2343	71.0392	66.6355
1110019K23RIK	77.4139	68.8196	57.0023	72.2702	71.1211	63.8354	33.8167	27.8319	28.2326
1110019L22RIK	93.4323	76.7124	61.3961	98.6902	98.9415	94.0753	47.4068	34.9495	31.7258
1110019N10RIK	412.449	373.524	255.195	681.545	781.368	689.322	202.876	169.105	158.429
1110020A09RIK	120.799	124.974	78.4088	142.846	167.319	148.99	74.079	46.6927	54.0479
1110020C03RIK	75.4992	75.1747	71.0241	67.0549	74.0677	66.0531	35.2241	30.4819	30.0801
1110020C13RIK	458.775	285.501	209.339	2693.81	2464.27	2343.39	630.841	160.772	194.962
1110020G09RIK	81.3925	75.859	52.8393	77.1419	68.1312	76.0316	44.4781	25.6385	33.4197
1110020L19RIK	75.7994	77.1232	56.9816	111.637	123.318	123.251	47.1927	31.326	42.7061
1110020M19RIK	189.574	149.484	131.701	204.944	212.63	190.964	74.912	59.7449	54.5406
1110020P15RIK	4620.35	3788.65	2921.87	5838.26	7599.14	6574.11	3208.09	1796.19	1801.68
1110021H02RIK	912.618	571.32	450.497	1373.8	1590.7	1333.03	306.859	237.519	245.153
1110021N19RIK	71.0255	66.7886	58.1425	63.1115	66.5817	62.3346	40.4841	28.2505	29.3588
1110025F24RIK	222.917	183.876	126.683	285.47	334.888	505.356	139.208	91.058	101.799
1110025G12RIK	66.5285	58.8057	52.2577	72.9298	76.3793	62.1968	38.6645	31.0683	35.1301
1110025I09RIK	154.299	138.283	96.4813	140.399	151.983	132.41	63.8732	45.7357	44.5531
1110028A07RIK	70.8535	72.413	61.9755	57.1392	58.5871	67.8439	34.2914	28.3414	24.0375
1110028E10RIK	1799.02	1401.66	788.023	1872.85	1570.58	1541.08	505.338	554.698	533.202
1110028N05RIK	92.0553	76.5361	59.8685	97.0748	86.5781	93.0426	37.0546	33.6315	31.8147
1110029E03RIK	81.1406	63.339	63.6791	81.1685	81.2252	80.4723	34.5507	31.2447	28.016
1110030H02RIK	87.4644	67.6587	59.7522	109.522	114.044	115.612	39.7729	31.8148	37.4437
1110030H18RIK	79.1438	73.4913	61.1847	66.7376	77.2512	74.743	35.906	28.9373	29.6503
1110030J09RIK	173.889	150.865	103.931	329.883	364.336	341.236	91.4664	66.9287	76.9148
1110030K22RIK	81.7955	62.7413	57.7288	70.6204	77.0778	82.6361	34.168	30.2025	33.0709
1110030L07RIK	84.7448	68.299	63.0127	70.3794	73.596	69.9935	36.4565	33.9556	29.6758
1110031B06RIK	107.171	103.687	94.1699	107.386	101.529	106.548	44.2298	35.5318	36.1955
1110031B11RIK	62.6136	56.2811	60.3864	76.5921	81.467	77.1079	41.9192	33.0203	32.364
1110031I02RIK	75.1471	72.4523	61.4291	114.396	102.978	109.083	40.4355	32.6748	32.4877
1110032A03RIK	77.3609	75.4585	62.833	78.1088	83.276	74.614	35.5058	30.7564	32.3729
1110032A13RIK	432.661	287.578	203.704	608.332	579.808	533.586	183.778	160.807	151.684
1110032D12RIK	218.32	188.307	95.2154	584.852	582.606	578.915	117.067	157.859	94.1852
1110032E23RIK	76.8763	77.0296	60.776	72.0914	66.8542	68.1038	35.1446	29.8434	30.1714
1110032N12RIK	570.267	512.224	326.366	1123.58	1126.49	1099.23	282.838	236.392	240.142
1110033F04RIK	64.4338	65.1099	58.786	63.2777	58.7682	60.0929	34.9336	27.4051	26.1939
1110033I14RIK	64.1978	60.0129	51.7895	59.7254	63.9078	63.61	30.4605	24.8885	29.6271
1110033J19RIK	75.9999	76.9	65.0787	63.8856	68.4731	74.1055	30.8552	29.2521	22.744
1110033O09RIK	59.9474	54.8138	65.1328	68.0131	74.6379	71.3008	33.5379	29.1561	30.1491
1110034A24RIK	102.917	99.103	60.373	189.859	243.481	212.58	71.8019	45.8206	52.6852
1110034B05RIK	73.9142	58.763	62.0687	83.404	87.1394	79.2796	33.2842	28.4688	29.688
1110035L05RIK	79.4191	65.7989	67.0723	100.816	111.323	91.5044	41.1769	38.3419	41.167
1110036O03RIK	171.149	123.142	76.98	563.838	643.026	557.022	314.762	45.8064	61.8236
1110037N09RIK	1243.88	1150.45	517.612	1431.8	1550.02	1028.88	360.107	471.255	483.739
1110037P11RIK	76.0882	71.449	61.6836	66.528	69.126	80.2092	36.5196	25.0245	28.8619
1110038D17RIK	410.943	286.441	201.675	359.433	321.776	310	100.171	93.3463	91.9669
1110038F14RIK	181.321	158.291	93.6983	701.095	592.219	480.748	114.659	72.3088	80.6808
1110039B18RIK	131.853	120.54	90.1996	193.028	174.925	167.845	60.1531	56.1881	50.839
1110048D14RIK	77.2492	74.917	62.6958	69.8012	76.2624	76.9542	33.9205	30.7421	25.2972
1110049B09RIK	66.9805	55.5579	58.4213	77.2632	79.6015	81.0252	37.9063	30.006	33.5487
1110049F12RIK	398.812	284.454	135.16	759.056	736.198	604.251	156.631	130.999	128.125
1110049G11RIK	428.631	377.098	266.538	497.561	590.041	547.266	323.241	199.826	210.415
1110051B16RIK	73.7973	64.2081	57.7731	78.6218	84.284	82.5692	36.1647	29.449	29.5261
1110051M20RIK	59.2234	53.7378	49.348	64.2714	66.7752	64.5362	31.7874	26.5396	27.0755
1110054N06RIK	480.736	402.088	231.918	689.776	636.113	542.524	177.566	177.928	188.474
1110054O05RIK	76.9782	87.2919	65.5114	211.443	210.568	185.08	48.0569	36.5075	38.1685
1110055J05RIK	69.8177	63.7062	60.1448	63.7372	67.5594	61.9083	30.5312	27.2222	25.3217
1110055L24RIK	74.3869	62.7803	62.7575	62.8102	57.2015	58.9679	33.8351	29.4416	30.6179
1110056A04RIK	73.3211	58.4021	59.0712	77.3481	82.9193	83.4895	42.7852	31.3241	36.604
1110056N09RIK	108.525	112.419	76.6086	236.418	239.803	207.327	60.4006	53.8976	62.879
1110057K04RIK	372.503	289.58	188.214	512.513	545.188	469.043	157.601	114.763	124.051
1110058A15RIK	63.0967	67.2775	50.6185	71.3853	74.6763	74.9533	32.7995	26.8421	32.7386
1110058L19RIK	330.608	308.004	149.163	445.721	453.469	543.079	227.724	113.317	141.718
1110059E24RIK	169.952	182.608	121.15	293.778	304.662	310.624	117.626	73.9828	119.898
1110059F07RIK	360.744	364.726	237.521	436.858	426.316	378.208	108.883	121.743	117.223
1110059G10RIK	122.024	128.796	90.7228	127.364	128.266	123.206	43.1212	47.0025	38.6248
1110059P08RIK	109.032	90.9049	62.3904	210.639	180.578	198.011	55.606	67.2512	48.6217
1110061N23RIK	74.1447	70.9109	60.3622	82.2506	77.0917	77.3	35.4286	32.2631	34.3481
1110061O04RIK	357.213	268.213	172.909	386.371	389.515	336.236	111.08	128.74	123.978
1110063F24RIK	298.941	251.565	117.987	615.493	506.282	456.459	89.9236	106.941	89.2826
1110063G11RIK	61.4419	54.8487	56.0373	63.9411	77.4768	68.2417	32.0039	27.2844	28.0228
1110064P04RIK	128.095	101.722	88.5416	110.246	124.541	116.199	47.2229	37.0273	44.1794
1110067D22RIK	62.7899	77.6446	61.744	86.6112	80.7664	65.8525	38.7363	29.4924	32.3601
1110067I12RIK	62.7518	70.2836	61.323	68.0382	77.6016	65.576	35.0652	28.5623	30.4488
1190002A17RIK	77.6767	76.1766	64.4622	81.9177	86.8365	85.71	35.2311	28.5093	29.2073
1190002C06RIK	236.517	172.475	98.5135	258.463	186.895	187.395	108.098	76.3452	71.904
1190002H23RIK	6687.74	5391.71	3221.96	4834.63	4419	3794.92	1539.51	2410.48	1443.78
1190002J23RIK	70.8024	54.6457	60.1944	82.8389	95.0464	80.0862	35.8401	27.11	30.1087
1190002L16RIK	2300.84	1871.93	1629.36	3009.4	3212.33	3089.66	1447.19	628.85	777.601
1190002N15RIK	155.92	127.313	87.3385	116.14	117.599	116.319	52.0458	48.0062	52.252
1190003J15RIK	70.998	73.1946	65.6229	85.4555	92.8191	98.2159	37.5628	30.779	32.1306
1190003M12RIK	67.1196	60.7247	57.9363	70.0213	74.4424	74.8216	32.1215	34.9538	34.7364
1190005F20RIK	856.76	698.33	362.635	1134.56	1085.53	1030.43	302.699	288.664	265.045
1190005I06RIK	68.5897	67.4518	54.6053	95.7652	86.7835	86.6986	36.3572	30.5048	30.5147
1190005P17RIK	120.744	119.166	85.3415	171.327	222.1	215.792	80.1889	60.3643	55.6521
1190006E07RIK	82.7209	73.3521	75.9838	79.4388	68.2629	76.6283	35.671	30.0425	28.4979
1190007F08RIK	72.1721	58.625	55.0733	77.4015	79.7171	72.9841	37.3333	30.3738	30.6535
1190017O12RIK	1006.17	635.717	577.472	1077.79	1301.74	1142.07	419.572	297.199	302.061
1200002M06RIK	94.7767	77.8316	60.1702	110.464	114.702	119.651	55.767	34.4868	37.7764
1200002N14RIK	85.0039	62.7473	64.1211	123.488	89.2835	88.6821	36.9173	33.0889	26.7133
1200003C05RIK	654.102	542.497	382.055	836.205	813.987	771.828	253.795	198.389	227.192
1200003C23RIK	58.021	58.5202	51.3142	72.2576	80.4728	71.2379	36.5406	35.8341	26.7492
1200003I07RIK	374.913	291.204	247.167	442.983	448.375	371.515	89.064	105.978	65.1677
1200003M09RIK	73.8548	74.477	62.8764	74.0885	79.3901	74.5638	29.713	26.4671	29.4476
1200003O06RIK	344.615	273.023	167.19	598.088	530.677	461.228	157.19	120.073	161.734
1200004M23RIK	136.913	99.7893	93.0679	112.546	123.148	100.225	44.4528	45.0315	37.9092
1200006F02RIK	103.997	115.34	69.2409	348.909	369.209	354.092	144.04	40.5122	54.6751
1200006O19RIK	237.899	225.893	115.203	326.96	335.05	271.905	94.8306	79.0122	85.6896
1200007B05RIK	67.9434	59.3743	58.2072	93.0362	77.232	84.2921	35.2614	28.1425	26.2511
1200007D18RIK	234.721	211.07	128.245	558.236	538.432	531.069	120.145	91.9121	99.4389
1200008A14RIK	62.1039	65.7477	61.2063	74.0015	71.34	69.0594	34.4921	27.8442	26.8394
1200008O12RIK	90.8745	199.403	91.8109	329.566	462.155	475.815	120.738	98.5896	127.616
1200009B18RIK	369.313	307.756	188.499	568.286	565.206	551.369	143.803	113.431	116.907
1200009C21RIK	766.371	361.035	243.253	2926.1	3765.71	3071.28	957.788	561.482	563.736
1200009F10RIK	74.7264	53.4328	56.1162	65.5468	71.0193	73.9622	27.2991	28.777	32.1856
1200009I06RIK	65.6177	57.4583	55.9399	233.362	211.335	262.069	35.0425	24.2007	23.1997
1200009O22RIK	65.4097	63.6356	54.0739	73.1088	67.4025	50.7599	35.7927	23.9525	24.6618
1200011I18RIK	78.6743	76.063	65.122	92.1074	94.6484	86.8033	44.5603	31.8154	34.7551
1200011M11RIK	69.213	62.5411	59.2314	92.3369	93.2093	95.679	36.6355	28.7975	29.6776
1200011O22RIK	492.421	447.564	213.472	881.059	866.941	802.553	281.158	207.443	215.882
1200013B08RIK	4215.53	3473.37	1884.83	6331.94	7602.85	5270.93	1532.84	1902.69	1747.98
1200013B22RIK	71.7666	67.2254	55.6183	128.594	101.816	111.967	67.2017	29.4242	35.2548
1200013F24RIK	246.802	244.654	156.585	379.287	373.609	384.241	117.882	83.5145	85.8571
1200013P24RIK	91.5872	87.9514	68.833	108.027	128.406	130.362	54.1436	38.5953	40.8226
1200014J11RIK	913.58	769.45	253.552	1092.34	1111.15	1036.01	616.162	391.627	399.199
1200014M14RIK	68.4444	67.3139	52.8419	58.7753	58.9704	61.2402	30.8226	25.7028	25.7629
1200014P03RIK	287.482	298.15	148.841	328.55	338.706	270.165	92.4835	102.508	90.8289
1200015A19RIK	1003.49	746.526	486.003	1126.59	1035.26	935.584	492.51	308.899	319.349
1200015F23RIK	173.103	162.71	94.67	249.166	232.644	236.59	72.6751	59.5069	52.7827
1200015N20RIK	66.0118	64.6545	54.9781	62.3621	67.7026	65.2768	34.3713	30.4116	30.1426
1200016B10RIK	426.499	403.36	281.976	528.286	546.395	453.762	135.248	138.286	123.99
1200016D23RIK	157.998	138.474	95.4588	267.813	233.26	235.115	82.5063	72.5987	65.3795
1210002B07RIK	66.8145	68.5745	54.2525	66.5716	66.7317	70.1312	31.5191	27.7498	27.2193
1300001I01RIK	87.1392	67.167	63.0426	144.243	137.191	160.973	37.8703	38.0775	38.9297
1300002C08RIK	62.1166	54.6907	58.8772	61.6626	60.2284	62.3354	28.19	24.3762	24.4563
1300002F13RIK	664.483	601.322	382.828	379.344	255.482	233.377	57.5605	157.786	83.3311
1300003B13RIK	80.547	68.7835	73.4856	84.0515	83.4408	77.4897	37.0271	27.0787	28.035
1300003K24RIK	505.406	383.878	182.318	915.564	865.614	824.249	209.061	207.402	182.463
1300004G08RIK	67.6196	67.912	58.9976	68.0849	66.5836	68.9602	31.1	25.634	29.1315
1300006C06RIK	434.323	390.74	253.387	449.25	489.661	466.464	175.166	142.35	159.684
1300006C19RIK	2973.66	2996.79	1754.82	5019.58	5647.42	4786.78	1614.63	1169.47	1060.51
1300006N24RIK	260.839	213.952	116.024	303.812	287.862	287.34	117.593	85.0326	79.9364
1300007B12RIK	414.119	341.583	177.375	503.592	478.693	494.701	176.632	143.318	157.948
1300007F04RIK	78.8366	82.1832	62.1696	148.096	150.038	136.923	39.4387	44.6437	40.3612
1300007L22RIK	61.8014	64.0635	59.5712	60.3969	61.8679	61.9776	26.7505	23.9894	23.1824
1300010A20RIK	65.8917	66.0952	51.8828	75.1399	73.6979	69.6338	30.6133	27.8333	31.9233
1300010K09RIK	102.915	88.8701	70.7075	88.043	103.25	109.541	49.6721	40.5015	39.9768
1300010M03RIK	68.0532	67.6679	50.2931	64.9101	65.5845	71.8675	34.2846	28.8086	28.4668
1300012D20RIK	60.5104	59.5835	56.9408	69.6343	67.8782	67.3778	31.6547	28.5689	26.4657
1300012G16RIK	79.7448	70.9559	58.5151	69.6161	63.6351	67.3567	32.1934	26.8034	26.1843
1300013B24RIK	133.923	316.659	279.023	1151.83	958.331	814.125	98.8007	119.509	45.0805
1300013D05RIK	188.786	168.276	122.055	299.954	326.358	301.579	69.6625	77.3661	58.6876
1300013D18RIK	76.5414	64.0925	62.9809	76.928	78.1015	68.8806	35.8829	30.1771	28.0465
1300013J15RIK	61.9177	60.2105	53.2468	71.0743	74.9216	78.9012	35.8183	28.6692	27.8933
1300014I06RIK	69.4451	72.8039	68.0356	100.153	87.1967	91.2092	43.9162	31.533	28.8906
1300017J02RIK	61.3243	87.4934	52.9307	90.9273	104.926	98.0713	28.3753	24.7978	22.6499
1300017K07RIK	122.736	111.487	80.9105	715.013	694.164	689.01	108.746	44.1249	51.4018
1300018I05RIK	1277.19	1231.99	771.996	2219.8	2290.78	2117.93	662.678	523.301	504.031
1300018J18RIK	188.816	190.905	108.403	194.025	198.973	175.125	61.3657	53.631	54.5226
1300018L09RIK	64.1918	70.9577	56.739	61.5174	85.8381	75.7987	36.3627	27.7182	25.372
1300018P11RIK	1002.47	911.78	508.407	1714.91	1577.5	1307.1	384.344	309.37	294.744
1500001A10RIK	53.8876	57.693	59.3067	67.3904	70.2588	64.7135	33.6776	27.5702	28.9904
1500001H12RIK	66.9838	71.8137	56.7115	69.7392	77.4769	74.8594	31.4974	22.9128	25.1229
1500001L15RIK	2590.41	1569.13	970.005	4151.24	3944.72	3556.01	845.41	701.92	602.553
1500001M20RIK	283.289	250.442	143.648	585.619	669.125	708.496	193.931	120.707	141.385
1500002B03RIK	68.9578	82.6436	61.6162	121.866	120.615	125.532	35.949	35.5868	27.5138
1500002I11RIK	381.656	441.351	200.765	890.293	928.568	720.611	226.726	182.331	153.285
1500002O20RIK	79.4952	72.9221	56.2558	108.132	108.186	91.6066	38.0299	31.3722	25.3279
1500003D12RIK	1215.3	1118.8	421.34	2796.45	2827.49	2702.29	1079.55	623.889	730.743
1500003O03RIK	777.924	462.785	238.116	1324.16	1317.24	1046.46	432.516	343.963	331.276
1500003O22RIK	112.17	91.5303	63.2137	333.314	386.237	316.439	67.9371	57.6419	59.6494
1500004A08RIK	614.311	685.55	398.308	466.785	366.963	340.115	109.517	307.46	179.436
1500005A01RIK	72.3841	62.6146	60.8487	122.661	120.423	124.747	42.4679	41.4226	32.0121
1500005I02RIK	77.8999	63.8159	59.7676	73.4038	78.5138	76.8018	36.9537	25.4106	27.536
1500009M05RIK	56.9627	60.1173	49.4446	65.3531	54.6565	56.5088	32.7622	25.5331	32.9766
1500010J02RIK	224.391	258.064	135.831	358.713	363.855	325.905	125.319	85.6193	111.901
1500010M16RIK	1482.9	894.263	899.135	10749	12794.5	11011.7	737.07	465.381	401.816
1500011H22RIK	848.011	821.794	530.298	1566.85	1428.59	1090.74	341.311	312.492	281.387
1500011L16RIK	2778.41	1464.94	1334.38	2611.33	2353.18	2589.66	952.483	719.14	645.211
1500012F01RIK	2198.03	1706.7	965.189	2669.02	3153.74	3005.15	1147.98	689.376	637.487
1500015O10RIK	81.5769	53.2223	62.7766	63.4871	68.9081	69.2563	35.4115	24.3078	26.671
1500016H10RIK	275.945	211.046	143.51	400.972	422.443	372.965	142.022	91.5306	91.0511
1500019C06RIK	90.2544	89.1063	64.0671	205.812	181.127	165.056	42.6603	40.4973	39.5648
1500019G21RIK	104.643	99.1269	95.1014	176.243	188.443	173.271	46.5981	45.216	45.339
1500026D16RIK	183.039	122.545	109.467	224.487	249.012	199.308	121.319	75.4561	68.4211
1500031H04RIK	92.0265	89.7296	65.7479	163.557	149.533	165.384	39.4685	36.8656	38.1854
1500031L02RIK	1311.21	1125.68	707.528	1151.01	1310.77	951.152	380.393	437.404	282.447
1500031M22RIK	71.6317	62.5428	58.8269	54.7096	63.7899	68.8593	32.2516	28.9176	25.7312
1500032D16RIK	1007.19	755.659	586.857	2065.59	2184.88	2011.46	721.768	476.091	455.27
1500032L24RIK	1814.43	1559.26	1535.63	2010.86	2223.69	1781.75	896.259	571.211	516.819
1500034J20RIK	72.4598	64.6727	61.345	96.8312	92.0186	97.3205	36.7225	34.1647	25.1584
1500035H01RIK	63.8757	76.4624	64.2464	65.1674	74.1608	80.0622	36.403	30.5917	29.9095
1500040F11RIK	59.5934	81.0195	57.3846	63.0459	63.2578	63.2103	41.0887	31.1632	28.8697
1500041J02RIK	68.1502	76.396	76.4581	88.4413	88.4294	80.8899	33.4988	35.0862	33.5133
1500041N16RIK	115.922	86.0429	93.936	324.855	325.05	294.131	55.2435	64.7231	55.255
1520401A03RIK	66.4064	66.7456	59.9269	75.9361	82.6347	79.5796	35.335	27.8975	26.907
1600002K03RIK	249.978	189.253	191.592	317.804	310.975	292.881	108.838	79.8631	79.4625
1600002O04RIK	62.4258	61.5627	55.087	67.519	72.9999	80.8129	30.9322	25.9573	25.5212
1600012H06RIK	233.873	162.438	138.175	379.243	324.882	326.612	66.5979	78.375	64.6511
1600012K10RIK	61.4623	57.2696	54.3731	67.0166	69.4714	61.0871	35.0183	33.7443	26.5357
1600013P15RIK	187.49	209.607	107.365	1938.7	1666.93	1534.88	128.207	88.786	85.9541
1600014C10RIK	103.652	77.9903	81.3822	118.318	108.469	105.261	40.6443	39.1786	46.6638
1600015H20RIK	71.8391	67.0987	52.2222	85.2771	82.5027	76.147	30.0515	24.3509	28.2532
1600015I10RIK	52.6152	53.8272	42.4883	51.9022	63.9617	56.4935	27.5682	25.4788	26.8823
1600016N20RIK	71.4451	79.9065	72.6145	110.994	105.985	98.3672	33.486	31.4239	33.4646
1600019D15RIK	925.66	815.03	631.222	931.318	1001.75	889.962	283.898	329.947	224.583
1600020H07RIK	79.6665	70.7836	53.3083	78.895	85.3932	81.5013	34.9704	30.3886	29.6717
1600021C16RIK	219.816	237.431	124.007	342.635	350.953	321.029	88.036	100.081	79.1288
1600022A19RIK	69.8466	63.763	59.7292	75.7363	74.1786	73.496	35.1833	28.9134	27.8645
1600023A02RIK	71.708	59.002	60.6725	73.2326	78.0557	72.8947	32.4917	30.7151	24.2901
1600025D17RIK	101.729	66.3819	69.2141	115.27	148.655	126.121	41.0977	33.234	34.344
1600027N09RIK	78.578	86.9086	74.7939	154.949	183.325	151.276	39.39	37.5521	41.6259
1600029D21RIK	60.6834	57.0551	60.4541	65.7099	69.1492	68.9652	32.526	28.2985	26.7999
1700001A24RIK	1176.12	685.534	423.57	801.431	1152.81	709.066	422.818	254.909	309.106
1700001C02RIK	77.2751	68.1739	54.3211	65.6327	66.8651	71.0273	32.8473	24.4656	26.2295
1700001C14RIK	282.785	211.68	165.637	397.925	367.393	347.339	122.178	93.414	98.059
1700001C19RIK	70.1834	58.5892	58.3401	69.5816	67.7269	65.7882	33.7945	27.7652	26.969
1700001E04RIK	56.1723	56.9692	52.3881	65.093	72.9385	73.3653	37.7461	29.1771	29.6937
1700001F09RIK	71.7889	71.9336	48.7835	82.0239	88.3148	79.823	43.7104	34.2615	28.6856
1700001F22RIK	74.1532	63.7784	63.7003	75.7695	76.3004	81.3522	39.3104	26.081	29.1895
1700001J03RIK	65.8559	62.9504	64.0079	76.3211	73.0271	65.1357	33.6688	33.9811	27.3753
1700001L23RIK	67.3282	70.5992	65.5887	70.0041	84.6284	77.605	37.2555	28.9078	28.2152
1700001O22RIK	68.1771	76.5463	62.2287	83.8169	81.3346	73.1462	34.7425	28.6685	25.1694
1700001P01RIK	71.5926	65.2053	54.9434	77.7494	83.2746	71.669	37.7443	30.4062	28.973
1700003E24RIK	62.187	52.7077	57.3612	73.7857	70.6219	71.4101	33.4275	29.4592	27.2352
1700003F12RIK	78.6307	73.3334	66.7229	89.7319	80.8908	87.5162	32.3267	25.8103	24.6035
1700003M02RIK	70.828	70.1726	52.9322	63.2371	73.1566	71.0932	35.3246	26.7613	27.7911
1700006C19RIK	59.5851	48.4228	55.7832	68.0362	70.5205	71.522	32.7779	24.314	24.4382
1700006D24RIK	102.569	99.5086	89.9946	88.5661	94.0758	87.19	42.2626	39.6002	33.9724
1700006H02RIK	76.746	71.3572	65.2686	61.8421	68.7033	76.9853	33.5948	28.5164	27.7646
1700007G11RIK	61.0044	51.9843	49.9448	61.5778	74.0837	59.103	31.0761	26.0743	32.7318
1700007I06RIK	68.7904	78.1228	58.4632	74.1981	79.7193	79.6449	33.9964	33.6508	31.9561
1700007J06RIK	84.7526	66.0886	54.0413	69.4676	68.5742	74.0242	37.2486	29.8485	28.1889
1700007K09RIK	74.6611	75.1894	56.4572	80.2345	71.8601	77.8853	33.0623	30.977	27.8879
1700007N18RIK	62.4808	54.9632	52.9038	85.2188	75.7725	80.6647	28.2709	25.9218	25.5984
1700008F21RIK	51.0249	54.6897	56.2159	64.7741	58.6657	58.3458	30.9254	29.4543	30.6216
1700008I05RIK	63.6872	61.4223	60.5647	81.4179	86.7224	88.1629	38.3384	29.5846	31.6408
1700008P20RIK	69.4041	66.4095	56.9859	85.6465	71.9925	74.7432	39.1553	27.8168	31.7868
1700009P13RIK	129.335	91.062	73.1474	79.9138	83.6482	81.6174	47.9305	33.4308	34.2649
1700009P17RIK	63.0844	67.0601	52.1626	63.155	67.1823	67.9385	34.1139	31.3124	31.2093
1700010A17RIK	67.2929	64.7728	57.8331	64.036	69.61	64.1129	34.8297	28.6653	27.1245
1700010D01RIK	77.3361	70.594	55.3946	72.0085	68.4335	74.2879	35.1998	31.9258	32.5132
1700010I14RIK	61.4513	52.1481	52.5572	64.1802	65.7992	65.2629	38.3933	28.1631	27.721
1700010M22RIK	63.9305	59.7006	51.6117	63.6042	69.7986	62.8566	33.4777	26.7382	28.5492
1700011A15RIK	63.4272	54.4265	56.5053	58.5474	57.3935	63.1519	32.3366	28.3304	27.5854
1700011C14RIK	65.1599	57.8456	58.039	74.164	79.649	75.8039	34.8538	28.5492	29.1645
1700011F03RIK	64.7083	50.6698	55.3755	92.8318	77.7937	84.3073	33.311	31.5849	30.7457
1700011F14RIK	73.1337	58.4315	61.9856	63.5546	62.2052	67.4176	34.998	25.6354	28.3487
1700011H14RIK	73.6357	55.2625	58.4836	65.245	65.5479	61.9935	35.0797	29.9652	27.1701
1700011I11RIK	126.154	137.354	80.118	266.823	229.632	227.972	65.0379	64.6545	63.6084
1700011J18RIK	68.8391	62.9915	57.5567	70.1157	60.8746	60.2743	33.4413	26.4575	25.428
1700011K15RIK	60.8272	60.583	52.5825	63.4863	71.81	70.019	33.7374	26.2933	30.7796
1700012A03RIK	47.408	51.5859	46.5703	65.3919	66.8286	70.7363	34.9305	29.8299	30.1061
1700012A16RIK	70.0374	68.1596	57.2985	66.5275	77.7166	80.5293	39.6742	31.7149	36.6026
1700012B09RIK	64.0362	66.4398	57.9604	92.2272	93.1076	87.4825	39.8218	28.7616	30.6156
1700012B18RIK	70.3781	69.2039	57.7483	174.107	191.866	192.635	37.4047	26.5262	28.3771
1700012G19RIK	2113.66	1606.87	1164.49	2232.74	2680.92	2527.05	1489.53	775.218	755.013
1700012H05RIK	56.7664	49.3918	51.6153	57.032	61.3342	55.362	33.1642	27.7885	30.0711
1700012H17RIK	117.604	72.365	61.6453	109.692	107.267	128.783	72.0373	37.1236	40.0108
1700012L04RIK	60.383	56.9169	55.0736	78.4608	69.6129	74.8825	32.4358	23.8399	28.7874
1700013B16RIK	69.3566	54.0405	57.1599	63.1629	77.404	81.5648	31.2419	26.5022	26.0125
1700013G24RIK	67.8146	55.2884	58.6309	80.6508	76.5914	79.7561	37.4984	28.4687	30.6748
1700013H19RIK	111.867	78.3535	88.6749	152.366	198.596	199.03	64.6297	48.2045	43.6737
1700013L23RIK	142.343	132.397	102.374	124.126	120.181	114.997	45.2097	40.7891	35.9944
1700013N18RIK	67.7224	65.6418	58.7128	85.1056	80.0742	82.4007	34.9402	27.7904	28.0506
1700014P03RIK	85.3564	79.3703	60.7664	96.9426	102.898	104.43	43.9621	37.0319	31.9017
1700015E13RIK	73.2441	71.55	53.2893	96.6287	95.0396	99.4995	35.0575	24.6226	27.574
1700016C15RIK	60.6863	61.4047	57.5169	93.0246	101.106	99.7488	40.8828	28.9702	27.8278
1700016D06RIK	70.9334	68.3097	63.1422	77.8459	82.0355	79.9584	32.9032	25.8122	26.394
1700016F23RIK	65.4271	61.8473	56.3999	91.5362	90.8435	83.3961	33.4038	25.8952	30.7501
1700016G05RIK	65.5848	65.6359	56.0362	73.0213	78.7071	71.7072	34.7355	25.1344	27.0101
1700017B05RIK	75.6988	55.4979	59.1831	69.1427	67.4276	66.4246	31.8719	24.4715	23.8623
1700017D11RIK	78.3762	83.3676	64.149	110.745	107.401	98.0178	35.4796	32.428	30.8509
1700017I11RIK	74.8022	62.5176	60.6266	73.0655	77.4348	76.0688	31.8488	29.972	29.5992
1700017N19RIK	79.8069	71.1215	55.2058	101.939	91.9182	91.6088	39.7228	31.7806	33.6662
1700018B24RIK	63.3467	62.401	53.6681	61.649	59.4433	69.043	33.6162	27.7961	27.2217
1700018C11RIK	56.9029	61.1012	55.4805	101.944	100.225	103.477	39.6084	31.234	29.3225
1700018F24RIK	62.0567	59.6811	59.9076	78.9496	91.4077	79.4575	34.7052	29.4263	27.483
1700018O18RIK	40.9938	47.1097	45.7536	61.5543	73.3368	83.8916	32.1225	29.0762	25.1947
1700019B16RIK	57.4623	66.0711	50.4474	73.6369	72.4941	74.0624	32.2131	32.4479	29.5231
1700019D03RIK	68.0648	51.2608	64.8366	68.289	74.8679	61.2783	34.2198	26.0292	24.5452
1700019E19RIK	63.1728	57.6472	57.5735	93.7054	83.3447	80.4438	35.0553	32.2749	27.7337
1700019F09RIK	73.1027	64.3287	51.4604	66.0329	65.3869	65.1385	32.2159	28.3766	25.0523
1700019G17RIK	72.8088	71.7476	59.0874	81.6807	86.2962	91.0467	37.2998	30.892	29.4341
1700019H03RIK	58.5469	64.7231	59.4612	92.0203	79.2503	81.8987	33.5405	32.4081	28.4648
1700019I23RIK	85.5697	65.8709	60.5471	72.43	80.7668	71.7077	32.2353	27.3199	28.2896
1700019L03RIK	70.0727	73.0759	51.2392	98.6752	99.566	100.136	49.563	32.1304	29.8095
1700019M22RIK	70.387	74.4887	63.7121	71.269	76.9716	73.6038	34.715	30.2703	28.8635
1700019N19RIK	56.317	54.544	53.129	55.1617	67.84	61.9222	37.4123	27.2056	25.4917
1700019P01RIK	59.0368	63.7763	49.152	77.0103	78.2285	77.7817	34.163	31.5703	30.0524
1700020B09RIK	64.8794	64.2792	58.3488	79.9758	78.6829	79.0634	38.9312	32.4423	29.763
1700020C08RIK	69.3554	57.6521	58.8885	65.1595	66.55	62.518	33.9675	27.5266	28.2052
1700020C11RIK	89.4697	81.2982	69.5714	90.7003	95.8906	78.9693	42.3878	29.8147	34.3871
1700020D05RIK	140.72	101.634	101.561	137.559	135.417	123.918	38.3036	42.592	52.6867
1700020H15	77.7121	61.8057	62.6365	68.7544	69.1962	63.1366	26.0033	29.3871	23.9648
1700020L24RIK	67.3337	64.5312	54.5805	86.2661	65.1726	69.8768	31.3849	25.745	25.8243
1700020N01RIK	62.3625	69.0031	51.593	66.9948	70.7866	73.885	33.3061	22.704	30.261
1700020O03RIK	113.174	94.6066	72.4566	166.179	140.681	152.696	63.1496	44.93	46.5122
1700021C14RIK	200.748	151.306	122.891	296.361	311.198	305.329	76.9175	67.2539	61.5967
1700021E15RIK	81.2412	91.5275	51.5115	97.8939	103.997	112.034	37.3933	28.112	31.4354
1700021F05RIK	361.316	327.616	243.185	911.449	746.884	692.992	219.637	171.374	189.964
1700021K02RIK	63.624	66.1922	60.5381	73.0616	74.544	74.0281	35.618	32.188	32.2978
1700021K19RIK	247.391	191.146	119.294	186.818	221.175	199.093	70.2164	66.4383	70.1236
1700022C21RIK	105.955	83.0689	65.1885	121.623	121.707	112.708	51.1173	36.9402	41.3275
1700022N24RIK	151.575	120.835	93.2539	192.851	180.696	173.127	82.2037	56.4827	59.7124
1700023B02RIK	398.549	353.804	183.54	551.197	466.085	458.992	147.433	117.732	111.855
1700023E05RIK	72.036	60.5394	58.6405	73.6565	80.2113	76.7588	33.6704	27.1844	27.0142
1700023I07RIK	65.9145	61.3547	55.9608	71.5156	74.8861	71.3246	33.7877	29.1907	30.8574
1700023M03RIK	91.9603	139.564	80.7581	114.09	144.065	112.724	47.888	34.6991	39.3487
1700023M09RIK	962.668	809.826	627.683	3344.25	3129	2859.28	576.264	574.672	483.443
1700023O11RIK	188.286	143.397	83.5952	346.899	415.685	403.491	97.5996	85.6354	77.238
1700024C24RIK	63.599	87.2971	56.0657	139.833	103.17	122.167	43.7074	31.1101	33.7416
1700024D23RIK	50.8972	70.1551	52.2456	79.3835	79.2889	72.8979	39.5949	27.5811	27.8558
1700024G13RIK	71.0074	70.7512	58.2971	91.2296	89.9924	82.5016	37.9017	24.6197	25.3257
1700024K14RIK	82.4974	64.8771	58.2397	68.2288	62.0302	67.1266	30.656	26.7146	22.6128
1700025B16RIK	101.638	126.381	68.0237	132.753	158.866	150.642	44.6714	35.8617	44.985
1700025D03RIK	84.5416	77.8333	57.9223	67.9947	63.8475	71.3244	36.3532	28.7692	26.0405
1700025E21RIK	84.6606	65.3261	55.0163	70.5728	77.8371	72.6657	35.3384	31.7933	29.7063
1700025F22RIK	66.8769	64.1452	61.0028	71.0286	74.3161	68.2967	36.6372	27.0166	29.4467
1700025G04RIK	214.705	206.703	126.262	177.199	172.676	143.683	79.5776	83.7629	78.0922
1700025J14RIK	101.832	91.2194	83.4227	115.462	116.701	110.114	46.3706	43.1923	38.8383
1700025K23RIK	66.0562	66.9043	56.1459	125.676	140.862	154.17	36.2387	34.3144	33.6258
1700026D08RIK	75.8495	54.4165	60.0929	55.3501	67.1995	55.5212	29.3161	23.8103	24.8849
1700026L06RIK	64.4573	52.96	54.8352	67.8751	67.2634	72.8167	33.075	23.9422	24.6034
1700026P10RIK	75.8895	67.8898	65.9335	73.0502	84.4776	80.8426	39.361	26.7814	29.3295
1700027A23RIK	70.8251	66.175	64.8139	71.1937	71.8482	71.9402	36.5766	24.6303	27.1654
1700027D21RIK	70.0032	69.3778	55.439	65.2182	79.087	69.1239	31.9806	30.2286	26.4469
1700027J05RIK	319.423	296.566	185.525	313.693	302.747	261.807	55.322	92.3364	88.9335
1700027M21RIK	53.7621	49.6084	56.3505	63.1329	72.101	65.6899	29.9558	25.3418	27.7691
1700027N10RIK	62.8954	65.6539	52.7449	73.9182	82.385	70.9099	46.8584	39.0706	33.6569
1700028K03RIK	70.5813	70.1931	55.0715	68.0487	70.4912	69.406	33.6812	27.9882	28.8479
1700028N11RIK	43.3173	62.9184	44.5532	63.9491	64.5587	129.898	36.1857	21.8534	27.4564
1700028O09RIK	72.9881	64.138	57.3269	88.947	87.6273	77.597	39.2206	23.615	27.9592
1700028P14RIK	78.3225	67.0983	58.3264	73.6668	83.6834	73.6568	36.8946	28.9338	28.1582
1700029F12RIK	56.2274	54.6479	53.322	61.3909	66.1027	71.6295	36.6472	28.3787	28.0627
1700029G01RIK	82.5519	83.9188	71.9042	81.6351	91.3524	78.6034	33.9378	31.417	32.3188
1700029H01RIK	64.1767	68.567	59.9823	68.2813	71.8941	69.6919	32.0551	26.816	28.5122
1700029H14RIK	67.2355	68.1505	56.1881	70.9541	68.8033	67.9897	35.096	27.3735	27.9847
1700029I01RIK	64.8856	64.3673	48.2691	64.7116	89.2305	87.4941	33.7951	25.8543	29.3736
1700029I08RIK	84.343	73.1793	52.016	106.317	92.4406	96.8558	41.3273	32.0982	33.2903
1700029I15RIK	75.6472	62.0963	60.4794	97.6676	81.8861	87.3624	39.1326	42.4376	35.5429
1700029J07RIK	68.8144	62.6776	59.8757	80.9596	97.9688	84.2698	39.465	31.3938	27.9923
1700029P11RIK	161.935	114.211	99.797	264.288	291.152	230.153	107.409	67.3567	74.3646
1700030B17RIK	75.7131	76.9114	61.8075	122.527	108.132	95.7116	42.1096	30.7941	34.7509
1700030E05RIK	87.3403	91.4565	69.9855	82.4215	79.8477	83.7221	35.2425	32.5493	32.8531
1700030J22RIK	72.0072	83.1509	72.9639	87.3822	92.4715	82.9884	40.5733	35.014	35.9774
1700030K01RIK	84.7913	74.7674	66.2766	68.6175	81.1032	82.2504	32.8986	29.664	29.6963
1700030K09RIK	139.073	149.233	98.3832	231.607	250.254	237.647	64.2948	52.187	71.102
1700034E13RIK	60.3055	64.8864	52.7859	63.9825	69.2185	69.4864	30.2273	28.0766	30.3414
1700034H14RIK	508.02	519.426	312.025	613.577	610.94	523.936	206.377	173.915	177.409
1700034I23RIK	75.5484	65.6517	59.7642	76.5672	85.3251	74.5762	38.3462	29.3224	30.7946
1700034J06RIK	60.9413	57.0388	53.3021	61.916	68.5972	64.6071	32.1106	25.5765	25.6181
1700034K16RIK	79.3028	71.5559	74.3861	87.5547	86.3694	90.6169	41.7393	27.3089	31.6066
1700034O15RIK	67.1188	69.6026	59.3109	71.3405	76.947	76.6429	36.0322	31.0032	30.5682
1700036D21RIK	65.4732	63.5241	66.8891	77.4907	81.5853	71.879	33.7461	29.0406	32.4345
1700037C18RIK	79.979	78.7307	63.0081	88.7611	97.6788	88.8481	40.463	33.2894	39.1785
1700037H04RIK	782.02	676.762	331.519	1383.38	1381.24	1280.38	510.361	315.703	341.159
1700039E15RIK	69.1329	70.9962	59.7881	81.5351	81.9022	69.3819	41.2381	29.4342	33.4135
1700040I03RIK	143.079	105.451	76.0174	170.195	190.704	202.744	57.8657	44.2115	55.3347
1700040L02RIK	62.498	68.0764	53.9258	79.3495	79.7498	78.8481	35.846	26.4013	28.5145
1700045I19RIK	78.2164	70.835	61.0403	83.7973	90.5107	94.0787	37.8886	30.7046	29.0523
1700047E16RIK	109.906	90.8531	78.9068	115.711	112.715	106.945	44.3651	37.7557	36.1972
1700047I17RIK	530.509	459.739	264.918	662.97	725.313	603.237	212.043	200.467	186.273
1700048E23RIK	581.915	494.752	314.405	766.871	771.468	833.105	269.072	209.422	194.214
1700049E17RIK	73.8888	67.5793	59.1409	70.7296	74.373	82.1444	36.194	36.9089	29.8427
1700049G17RIK	83.8468	57.2101	59.1999	73.1428	73.1931	79.704	32.9931	28.276	30.3647
1700049K14RIK	72.3414	64.3711	57.5089	67.7233	65.097	68.3719	34.1034	32.1825	25.5049
1700049L16RIK	65.5807	59.4116	60.6497	69.0624	75.1229	78.203	32.2178	27.4958	27.1332
1700051E09RIK	80.319	86.6177	62.2338	80.2143	87.9092	82.6464	37.1825	29.6887	32.8933
1700052H20RIK	59.9873	59.7549	52.7558	55.0995	65.8144	55.5844	33.8807	29.0899	27.2504
1700052N19RIK	489.471	436.979	282.779	473.457	522.461	460.575	186.917	152.516	143.738
1700054O13RIK	58.4141	56.1197	55.9805	53.6595	54.4957	57.0994	32.7109	22.4448	25.7059
1700055M20RIK	69.0114	57.5009	52.895	66.0726	69.5808	70.1561	35.6914	30.2748	25.9002
1700055N04RIK	62.1686	64.9607	60.3611	64.9815	69.7743	71.8544	31.6049	29.6842	29.0595
1700055O19RIK	503.191	358.08	219.42	732.481	619.279	520.465	267.162	150.493	151.415
1700057G04RIK	79.0794	68.4263	60.3865	66.1033	80.0789	69.3275	41.2497	29.1329	32.7495
1700057K13RIK	61.4392	50.4874	47.0948	84.9502	75.0992	70.7706	35.2095	30.2931	28.3795
1700058C01RIK	72.1583	64.7186	52.5978	69.4942	74.5875	74.8521	33.492	24.6959	21.8262
1700058C13RIK	65.4575	56.5441	47.5257	58.8991	62.9837	59.1885	27.4238	25.7024	23.851
1700060E18RIK	64.7887	68.7371	60.0197	71.8366	66.6457	67.8896	35.4485	23.3033	25.6538
1700060H10RIK	102.172	80.8765	74.2097	143.367	106.817	140.619	53.827	37.1116	38.9329
1700061G19RIK	63.0457	52.3975	56.8976	69.3499	64.025	66.0941	28.2138	23.6062	23.2431
1700063I17RIK	67.3939	47.5913	49.9671	67.269	64.3495	68.2032	31.0803	26.4587	25.4239
1700064K09RIK	368.188	376.581	193.346	624.459	558.663	541.18	145.958	141.486	125.635
1700065D16RIK	65.0334	62.2107	57.9511	65.0607	68.8638	66.6311	32.6744	32.0617	28.463
1700065I17RIK	80.0138	68.76	60.284	65.786	76.1178	71.063	31.7904	28.4555	31.5838
1700065O13RIK	170.465	142.697	111.061	155.488	155.032	142.169	81.0331	57.9657	62.0065
1700067C01RIK	65.1946	50.2438	47.7536	51.0416	56.8037	56.2662	31.2696	26.5874	27.0201
1700067K01RIK	85.5331	69.102	62.9013	87.0746	88.4837	86.1416	34.4752	32.2085	30.5341
1700067P10RIK	77.2447	68.2939	57.0904	77.2818	84.6334	73.2488	36.6861	23.6607	34.2922
1700069O15RIK	139.125	113.338	87.3508	211.816	204.117	196.113	68.5736	53.8302	52.3301
1700071E18RIK	68.1198	66.6177	55.6721	66.6514	63.0421	60.6778	33.6082	27.635	26.2505
1700071K01RIK	112.199	104.889	66.7776	211.501	259.408	269.287	72.7538	62.8926	55.0353
1700072E05RIK	79.4017	72.1126	56.5677	66.9156	67.0955	71.7144	29.6054	26.7715	26.4901
1700073E17RIK	52.5748	49.8084	45.8112	55.9305	56.4549	59.6288	33.708	25.852	27.4499
1700073K01RIK	66.6077	60.4228	55.6957	70.9268	73.0635	67.528	34.5925	29.6885	30.482
1700074P13RIK	76.5451	64.2706	56.8415	60.188	60.8815	65.1746	29.5881	24.6147	23.3158
1700080E11RIK	80.0727	73.3094	59.7083	68.6917	85.0435	75.5539	35.7514	27.6202	27.618
1700081D17RIK	69.1996	72.7319	61.6607	63.1357	72.6635	70.6693	31.6752	27.5019	27.6221
1700083M11RIK	58.3743	55.3575	58.0443	72.1267	75.4194	72.4803	33.1258	28.3513	30.6545
1700084C01RIK	80.8848	75.2746	67.5135	78.2346	84.1241	75.1731	34.9122	25.0629	31.5197
1700084J12RIK	65.0261	67.621	59.7482	61.5766	56.1464	58.0161	34.0178	27.0966	24.7801
1700084J23RIK	68.2555	69.416	59.4894	66.9789	74.8201	63.2962	30.7782	24.2579	24.7757
1700088E04RIK	78.2992	69.777	64.0292	72.1902	88.5783	75.8055	40.1056	35.3023	30.0308
1700091F14RIK	70.0451	56.4999	59.3357	78.0093	72.8413	69.969	31.1877	25.8555	24.7159
1700093E07RIK	76.7947	63.0736	70.2318	181.009	111.775	104.8	48.5352	28.5933	32.7787
1700093K21RIK	49.5659	53.4775	48.1844	68.153	66.3645	61.4115	30.3855	24.2761	24.6423
1700094C09RIK	74.5935	72.0678	58.4223	95.0779	90.9935	88.2917	43.4939	32.6968	27.0633
1700094E07RIK	60.5642	60.653	53.5955	66.9501	70.7781	60.8707	38.4624	29.1127	24.4288
1700095H12	74.4611	73.1619	60.6598	93.7127	109.69	102.355	38.4489	32.7721	33.8945
1700095K08RIK	69.974	63.7349	56.2242	79.0541	90.1326	82.5104	29.9829	27.1241	25.3944
1700095N21RIK	785.006	667.263	340.902	802.41	728.364	805.277	426.183	233.526	240.688
1700102P08RIK	105.649	119.493	86.832	114.407	119.195	110.512	38.6936	55.6759	33.8835
1700108E19RIK	68.2546	67.6308	54.7813	70.3357	70.4009	68.068	33.4715	25.9817	26.6192
1700108L22RIK	90.2364	75.3731	57.6981	115.065	123.933	114.465	54.024	38.4782	36.6272
1700108M19RIK	70.5418	74.332	52.578	75.5563	66.6438	71.0269	30.5091	25.8736	23.5559
1700109H08RIK	75.3437	78.5395	63.329	114.013	123.374	114.925	36.7352	28.3333	31.5867
1700111A04RIK	57.0198	59.2071	51.5603	57.5879	63.5061	60.8858	32.7373	26.956	27.3895
1700111I05RIK	68.0182	66.8985	52.5351	69.5915	74.716	71.7128	34.8782	27.8695	25.8553
1700112C13RIK	58.1268	51.2195	54.153	57.7028	64.7357	65.9151	35.5998	23.2326	26.3571
1700112P19RIK	53.8404	60.6581	45.5393	112.396	95.6499	86.1592	42.4441	37.2918	28.8335
1700113I22RIK	61.7811	64.6327	58.3845	69.1132	75.3775	76.6381	34.5015	30.0491	31.0797
1700113O17RIK	77.2038	80.5588	72.6469	81.366	89.7034	81.4328	41.0319	30.8117	35.8235
1700120B06RIK	78.4786	69.4924	57.4996	77.4908	86.7364	75.847	45.4544	33.1139	32.988
1700123D08RIK	96.9431	90.6591	74.6457	140.845	122.519	109.131	41.009	38.4608	35.1679
1700123K08RIK	61.8914	62.1565	60.4556	61.9297	67.29	65.5885	29.9612	27.3782	27.8872
1700123L14RIK	70.8414	79.1032	54.5588	78.7036	76.5915	85.9014	37.2756	29.0379	27.5701
1700123O20RIK	640.108	381.918	354.149	842.299	755.079	753.295	333.717	231.725	162.397
1700127D06RIK	72.3386	59.5737	60.9193	67.4871	71.8455	74.5673	39.3691	26.0384	26.1242
1700127F16RIK	77.9961	64.1468	66.2253	69.081	81.8671	76.4879	45.3944	29.272	31.7774
1700128F08RIK	71.116	71.7463	56.0027	77.3012	81.552	73.5442	40.9136	28.8707	29.4675
1700129C05RIK	66.8473	70.4255	59.2571	81.9081	79.164	78.2116	39.7315	31.4564	27.6973
1700129I15RIK	69.4335	52.8574	56.1302	69.9698	59.5547	68.1066	30.6544	27.2837	27.7901
1700129L13RIK	135.428	147.168	84.243	379.862	316.706	285.699	67.213	70.0965	59.7742
1810003N24RIK	249.467	245.407	156.502	699.94	863.169	938.284	97.582	91.6717	82.2549
1810007E14RIK	62.347	61.1063	55.122	50.8558	54.967	64.5713	29.0851	28.7088	28.3326
1810007M14RIK	114.188	100.144	95.7493	120.668	121.66	116.231	41.2659	45.3837	40.5404
1810007P19RIK	71.8507	65.7375	63.0705	66.8871	77.6477	75.3904	39.3041	31.7325	30.7895
1810008A14RIK	139.53	108.003	81.3159	208.16	245.67	195.695	68.0429	43.2147	45.2352
1810008A18RIK	394.553	274.993	192.851	515.285	514.543	465.455	138.206	133.645	129.499
1810008K03RIK	73.303	65.7512	50.0988	63.2992	66.643	68.2181	33.1835	29.1024	26.897
1810008K16RIK	62.5067	72.2666	60.7851	57.9161	64.1274	69.0362	36.2293	26.021	24.9771
1810008O21RIK	344.205	213.078	112.573	989.583	1028.83	844.832	234.062	135.189	135.667
1810009A15RIK	235.957	160.698	99.2152	520	505.086	480.45	133.692	90.3303	113.926
1810009B06RIK	96.1352	90.891	69.7539	122.27	130.461	108.739	53.501	41.0538	37.9937
1810009H17RIK	106.08	94.7985	74.6186	112.215	118.134	101.878	50.2328	35.866	38.4897
1810009J06RIK	75.0037	80.6439	56.1321	70.3584	70.1122	80.0107	34.2803	28.9753	29.6477
1810009K13RIK	89.5627	90.9798	68.7908	130.591	170.411	160.399	51.0455	35.3042	35.9005
1810009M01RIK	162.63	157.379	117.984	189.404	144.378	157.868	47.1315	93.1587	59.2285
1810009N02RIK	710.365	391.621	224.896	556.488	728.534	606.425	292.858	257.743	241.033
1810009O10RIK	353.832	260.096	138.517	461.06	410.125	411.179	130.527	85.1315	100.187
1810010M01RIK	58.3402	51.5354	48.7872	113.576	92.0303	103.549	34.8871	27.7117	29.902
1810010N17RIK	400.486	331.521	205.731	485.316	517.318	424.641	205.234	152.53	150.553
1810010O14RIK	59.1563	49.5837	57.7361	57.2047	58.1443	62.4823	34.4891	27.7924	24.5599
1810011K17RIK	81.2287	75.119	59.9045	74.9117	80.4907	79.1309	33.0776	26.325	33.2434
1810011O10RIK	69.3012	63.0589	52.1124	65.0914	68.7408	64.5282	35.0647	31.1574	27.7097
1810011O16RIK	141.238	97.9736	71.7929	544.569	577.568	435.262	121.797	66.4854	88.6657
1810012H11RIK	105.439	103.058	67.9249	111.175	118.377	105.959	40.8122	31.5858	26.849
1810013C15RIK	166.451	134.648	80.4071	363.253	361.953	325.945	84.6226	85.4977	66.8144
1810014F10RIK	196.121	187.547	103.988	327.951	405.553	349.898	91.8808	75.8427	87.401
1810014L12RIK	108.782	115.108	97.133	162.837	276.044	243.566	115.21	47.0189	56.2426
1810015A11RIK	81.2228	70.862	55.9821	143.572	159.847	183.936	49.4837	32.7929	33.5742
1810015C04RIK	215.256	230.868	165.364	2235.37	2403.14	2039.27	127.849	66.7635	95.1618
1810015M01RIK	487.248	448.49	212.012	581.895	646.448	540.086	317.973	184.405	201.704
1810015P03RIK	50.3276	79.0238	51.8441	79.2519	88.469	81.6617	29.1955	19.7754	25.8348
1810017G16RIK	885.212	650.388	454.48	1072.34	1183.48	962.485	423.645	262.863	277.21
1810019J16RIK	62.5208	66.5648	55.568	65.7609	70.6549	69.9206	32.0087	29.9899	29.7542
1810020C19RIK	752.973	614.833	424.704	830.169	1095.71	1070.26	312.574	260.485	323.698
1810020D17RIK	265.436	261.321	174.833	441.903	530.863	554.265	126.38	132.556	102.821
1810020G14RIK	76.5661	72.729	59.1265	69.0843	73.8673	74.689	31.8279	24.5675	27.7584
1810021J13RIK	130.759	127.566	79.7128	280.366	264.968	247.188	65.5508	60.9683	65.3985
1810022C23RIK	90.5166	80.189	62.9701	96.3161	99.1195	103.176	37.8261	33.617	30.8556
1810023F06RIK	62.4136	65.36	56.746	64.585	68.1346	63.8533	34.1633	27.8898	26.8184
1810026J23RIK	389.059	279.69	121.825	597.616	604.076	567.452	151.506	152.551	134.438
1810027O10RIK	1183.83	938.307	647.793	1179.07	1593.83	1386.38	598.351	339.179	412.533
1810029B16RIK	65.1215	69.0227	55.9354	68.1946	65.0974	72.7166	32.9974	24.7874	26.6883
1810029G24RIK	607.403	536.886	196.759	5251.83	4477.81	4486.25	435.041	309.024	308.902
1810030J14RIK	69.2195	78.5064	56.1643	97.8962	85.0039	83.4023	35.8239	30.7774	27.2551
1810030N24RIK	685.363	481.364	309.188	956.781	1006.56	942.793	361.897	179.365	203.821
1810030O07RIK	73.5636	65.7818	59.626	79.8709	88.2464	74.2837	42.4432	29.1369	33.6939
1810031K02RIK	1749.99	1079.44	744.396	1415.04	1301.55	1106.6	543.183	562.047	479.298
1810031K17RIK	74.9071	74.7531	65.9978	87.7972	83.6321	78.4799	32.5723	31.1667	26.1205
1810033A06RIK	98.0286	69.7551	67.7642	134.137	155	150.648	46.851	39.2523	35.4101
1810033M07RIK	87.9724	89.7135	76.2501	83.9275	84.5638	96.782	32.559	35.2222	30.2311
1810034K20RIK	70.3162	68.1573	54.2115	89.4732	77.8128	78.185	29.6099	24.4768	26.3125
1810035L17RIK	419.339	416.893	172.239	952.399	1236.53	1302.58	339.438	194.079	178.777
1810036H07RIK	75.6648	72.9985	64.4167	67.1132	67.0833	71.4459	36.0189	24.7347	25.9776
1810036I24RIK	65.2728	56.6522	64.2454	67.0641	83.8293	95.5082	32.7629	29.6005	33.9981
1810037B05RIK	75.8366	69.4806	55.9463	70.6711	70.3833	67.5423	45.8928	26.024	34.1292
1810037C20RIK	366.871	332.331	158.231	569.44	569.815	513.417	154.634	111.146	134.9
1810037G04RIK	130.455	99.6785	80.7812	167.473	159.458	184.316	73.2259	39.3676	45.0447
1810037K07RIK	55.159	52.4724	49.1068	70.6428	73.9004	71.0374	29.1567	26.3857	25.8766
1810038H16RIK	519.109	382.883	277.584	509.7	471.649	456.178	146.572	126.971	120.499
1810042K04RIK	295.064	286.075	234.784	347.981	389.138	394.666	185.786	114.737	114.394
1810043G02RIK	83.3704	73.5245	65.1851	125.484	111.906	111.861	36.7674	36.5888	35.204
1810043J12RIK	735.653	679.56	378.689	579.119	596.44	512.014	235.43	225.66	230.57
1810043M15RIK	220.631	191.827	111.183	292.76	305.981	306.195	93.4873	76.6594	77.2231
1810044A24RIK	86.7956	80.5795	58.3983	151.137	142.121	138.064	40.3872	37.5046	40.0722
1810044O22RIK	2445.22	2019.21	1511.57	2062.2	2108.48	1828.61	828.492	652.743	696.926
1810045J01RIK	140.345	135.308	102.915	170.447	159.237	141.89	53.7165	49.3591	47.6551
1810045K06RIK	205.221	171.06	122.679	506.082	551.686	501.052	76.6538	82.1894	71.7281
1810045K17RIK	74.9407	61.6362	63.9498	75.0857	79.3485	77.89	33.1669	30.3063	26.1913
1810046I24RIK	62.4425	70.2268	57.2009	123.795	100.994	95.9518	39.0899	31.5429	28.9743
1810046J19RIK	2749.78	1764.62	1508.25	3458.94	4037.23	3320.72	1277.88	869.072	789.101
1810047C23RIK	201.126	161.492	108.203	203.261	268.334	226.915	89.1094	68.4243	62.3652
1810048J11RIK	114.239	81.3712	76.8202	152.449	123.397	123.046	36.6184	44.3544	33.0926
1810048P08RIK	73.7445	72.9863	57.1825	92.4613	91.3148	90.9209	37.0235	30.5468	28.8937
1810049H13RIK	167.979	144.842	107.015	245.953	222.78	208.782	69.9231	44.3276	52.8824
1810049H19RIK	52.4414	60.7346	49.6592	60.2652	69.8214	68.6353	36.6508	30.1863	27.4686
1810049K24RIK	67.1722	75.3147	61.6431	83.2446	87.8133	75.4934	33.1086	30.3814	30.3203
1810054G18RIK	98.2133	85.2534	58.4862	124.813	111.41	124.15	45.1794	39.2597	38.2232
1810054O13RIK	133.654	113.463	76.71	130.109	113.179	123.714	49.7118	39.7516	45.7773
1810055E12RIK	254.419	231.661	187.338	361.515	340.904	305.485	105.733	98.3175	97.0452
1810055G02RIK	208.119	178.702	160.755	205.947	229.132	201.059	85.4169	69.9434	73.8777
1810057B09RIK	75.6329	63.2819	63.9031	84.9283	85.2301	84.18	33.8906	26.3613	27.034
1810057C19RIK	94.5806	70.0029	59.8751	74.4294	79.6667	83.1167	40.0057	31.125	32.3858
1810057E01RIK	68.9569	74.0814	72.7292	82.2197	93.3394	85.4986	35.6229	29.2418	33.5769
1810057P16RIK	56.8351	67.4126	54.2819	58.7671	61.1838	53.966	32.7471	30.5939	30.261
1810059A23RIK	251.816	197.618	119.554	349.565	337.912	331.485	85.8645	73.0387	75.5206
1810059G22RIK	449.35	421.359	234.562	1031.71	828.296	774.639	197.579	169.866	176.889
1810060D16RIK	401.387	346.092	252.943	572.427	748.547	690.037	301.875	160.408	178.983
1810060J02RIK	122.65	106.654	75.3458	130.143	128.643	145.65	59.9267	38.3364	40.6037
1810063B05RIK	620.26	567.224	368.193	1515	1449.58	1334.93	417.836	256.335	239.951
1810063P04RIK	75.0251	72.671	58.6697	59.0403	65.4167	66.7884	33.5618	28.1814	28.8011
1810064F22RIK	15293	13037.7	6348.88	26153	28284.7	27538.7	8597.69	10675.5	8830.12
1810065E05RIK	70.6838	66.9184	60.2481	75.9712	69.8244	65.5765	34.7955	25.9651	29.0641
1810073E21RIK	159.813	141.214	113.038	167.935	182.107	153.975	63.314	49.9475	46.1879
1810073G14RIK	910.744	849.397	683.838	1125.9	1192.37	1153.93	411.671	292.777	317.62
1810073N04RIK	76.3438	79.4812	68.013	90.8186	99.5472	95.9424	35.9708	42.2924	32.5243
1810073P09RIK	70.2999	65.952	53.163	78.7191	87.7425	84.2782	39.4543	33.1109	30.7845
1810074P20RIK	153.524	151.861	104.141	225.977	215.472	198.83	59.7771	53.1977	64.6387
2010001H14RIK	60.1154	66.3599	60.1648	55.0258	63.6068	61.7527	33.1033	25.66	24.9743
2010001J22RIK	131.66	128.718	95.9669	100.34	112.492	88.9275	40.1483	54.3757	62.3175
2010001M09RIK	95.9135	110.412	105.617	203.449	143.79	189.407	52.9953	42.7351	63.6727
2010001O09RIK	309.97	240.958	143.252	544.327	609.295	571.857	154.488	104.098	109.393
2010002A20RIK	67.3076	68.1117	55.4357	73.1085	72.7577	78.099	34.6642	30.3152	35.1337
2010002N04RIK	133.059	105.373	74.798	199.085	156.834	155.185	52.3638	55.5235	42.0387
2010003J03RIK	474.736	403.439	316.371	412.144	470.416	446.097	207.955	148.451	142.873
2010003O18RIK	513.335	364.523	293.426	369.895	427.314	357.123	162.938	152.59	132.175
2010004A03RIK	78.7943	73.7687	60.531	192.77	142.468	184.798	29.3673	29.2874	27.3398
2010004B12RIK	265.15	188.159	125.779	326.732	315.029	291.897	99.5512	75.4993	67.5107
2010004J24RIK	68.3132	60.54	59.2835	69.0979	68.5869	64.8922	34.3864	24.3361	25.3664
2010005A06RIK	70.0426	65.9169	57.6392	89.4877	92.7829	93.1686	38.2132	33.5254	27.0121
2010005H15RIK	56.5395	61.4904	47.1597	81.6129	73.4497	71.2344	35.1955	30.6425	30.4441
2010005J08RIK	106.716	94.8555	76.9528	140.682	143.883	137.066	44.9911	38.8507	41.72
2010005O13RIK	759.986	464.203	261.892	1465.75	1250.15	925.641	248.586	195.392	221.298
2010007H12RIK	1192.17	973.913	531.698	996.097	1114.05	1017.43	546.182	313.544	322.189
2010011I20RIK	88.9422	91.834	75.5718	103.584	102.829	101.039	57.4851	38.0901	33.3311
2010012C16RIK	110.874	104.218	73.4549	402.055	472.314	499.056	92.4148	45.6762	60.6623
2010012F05RIK	342.058	283.901	116.123	357.88	349.776	315.377	172.004	115.389	133.855
2010012O05RIK	71.7725	64.8928	59.9415	86.5286	102.382	100.281	35.2278	24.2336	29.486
2010013E08RIK	74.2869	80.5884	74.3388	122.036	107.124	122.158	32.034	30.0261	32.9428
2010015L04RIK	63.0303	65.8372	57.009	99.7125	112.074	116.109	32.9492	29.5902	33.6372
2010016B13RIK	70.3352	64.5152	52.8986	75.0077	70.5361	71.8883	35.4355	28.5438	29.6458
2010016F14RIK	70.8365	80.3084	56.4392	79.3184	69.3627	72.2451	36.131	28.0505	28.1793
2010100O12RIK	128.65	108.092	76.8842	348.383	462.132	481.276	83.1976	62.4622	63.0099
2010106E10RIK	72.9847	82.8893	58.9284	74.2453	79.0798	76.9616	36.639	31.0273	32.0924
2010106G01RIK	104.681	116.409	75.2107	205.234	198.536	176.685	50.6346	42.7519	44.4441
2010107E04RIK	4734.7	4000.72	2434.9	6632.95	8171.45	8131.9	4052.86	2797.82	2253.37
2010107G12RIK	91.606	71.5176	62.1938	210.484	254.145	281.643	121.428	37.898	40.4656
2010107G23RIK	58.7654	51.9066	51.4672	68.9977	70.5546	65.6016	33.4079	27.0696	24.7938
2010109I03RIK	64.063	54.6391	50.1449	70.3739	74.068	83.6177	31.684	27.1813	25.6613
2010110K16RIK	1480.97	1143	595.827	1632.37	1606.5	1659.13	672.521	363.998	450.215
2010110M21RIK	4064.2	3208.5	2089.66	5768.9	5362.87	4803.62	2195.8	1375.88	1396.19
2010110O04RIK	71.8181	56.175	59.2274	82.9045	78.1839	78.0874	37.3996	26.8541	28.7206
2010110P09RIK	65.2628	55.917	53.5552	72.2	69.0605	59.2833	34.4322	24.5526	26.7421
2010111I01RIK	142.518	120.84	91.4052	241.151	227.491	256.862	67.144	51.0321	52.1966
2010200O16RIK	162.547	135.69	72.1507	372.949	299.758	285.247	98.0368	105.607	79.2414
2010204I15RIK	227.843	181.767	98.3388	640.469	676.157	485.5	98.962	101.755	96.6271
2010204N08RIK	71.7376	61.9964	52.0328	57.9746	67.8647	64.3473	33.3339	29.3987	24.7052
2010208K18RIK	65.0953	62.3121	65.8115	67.4227	73.3409	74.9064	34.7588	30.2867	23.5119
2010300G19RIK	788.611	657.074	482.627	1120.33	1182.89	1080.16	252.486	264.865	188.562
2010301N04RIK	172.488	127.675	122.057	181.11	186.526	176.066	73.4091	57.8784	65.3785
2010305A19RIK	225.226	255.038	104.362	223.64	260.173	220.569	60.9926	68.2646	53.6489
2010305C02RIK	86.3474	74.9874	59.953	66.2399	82.1771	72.5436	33.6599	28.6345	34.6536
2010308M01RIK	186.75	122.916	99.6834	3548.44	3559.22	2757.58	285.818	74.3221	87.4499
2010309E21RIK	71.4599	59.0902	59.6628	61.1961	63.6674	59.248	33.7114	26.0275	25.2257
2010311D03RIK	384.878	394.989	211.984	374.298	422.658	420.88	152.277	132.182	114.322
2010315L10RIK	902.606	702.722	459.322	1003.28	1126.55	1011.62	481.535	330.548	272.734
2010316F05RIK	770.536	574.773	417.24	735.977	762.825	666.939	216.168	130.329	132.26
2010319C14RIK	3487.8	2776.2	2063.35	3974.26	4101.31	3728.72	1404.68	1340.98	1236.15
2010321M09RIK	843.144	696.755	521.272	1259.13	1394.28	1174.16	448.849	317.233	361.815
2010323F13RIK	67.3593	71.9185	51.6863	67.0503	79.3658	74.4985	30.3252	27.6961	26.5741
2200001I15RIK	61.5656	54.4853	47.9457	103.809	105.997	90.1839	45.2908	31.6138	41.4191
2200002K05RIK	64.1317	60.5611	59.1033	66.138	77.1997	68.2046	33.8606	26.1759	27.7902
2210006M16RIK	71.7135	57.3439	49.9707	63.645	68.2512	65.1448	34.2356	25.0624	28.0152
2210008A03RIK	87.7667	98.7276	65.8916	72.6327	99.1498	83.4855	37.9967	38.5872	41.2207
2210008I11RIK	675.567	698.641	508.59	1173.67	812.928	752.769	160.831	229.755	215.551
2210009G21RIK	92.0497	86.2191	67.8043	96.7731	97.8128	91.9803	34.4926	28.7644	25.6762
2210010A19RIK	150.484	112.929	103.663	136.202	143.625	140.353	53.8792	43.2967	42.7536
2210010B09RIK	130.878	143.805	82.9584	142.394	129.432	146.392	53.2557	54.3272	50.4458
2210010C04RIK	69.2305	62.5241	52.9145	81.7831	86.5596	83.9687	38.2847	30.2414	32.4441
2210010L05RIK	64.3898	61.6996	57.6036	64.1091	64.7614	60.6359	32.7111	26.2464	27.4448
2210012G02RIK	139.864	87.4316	77.5905	196.222	188.782	177.332	54.6848	43.4741	43.2281
2210013K02RIK	113.171	88.3933	51.9243	285.168	305.424	219.41	47.0757	54.0073	30.6663
2210016L21RIK	164.996	215.733	113.897	239.344	229.524	224.134	70.7034	51.0261	52.5893
2210018M03RIK	593.746	404.405	308.284	653.031	611.276	553.649	326.191	242.25	223.376
2210020M01RIK	68.2503	67.3978	69.8419	67.9417	79.0137	75.3467	34.5453	35.3453	30.5997
2210021A15RIK	380.649	329.464	209.079	695.243	653.985	688.367	230.246	140.682	171.041
2210021J22RIK	327.693	194.189	133.224	341.984	219.53	263.179	59.2292	72.6652	55.6867
2210023C10RIK	62.6516	65.6811	55.1788	66.9094	74.2038	65.2019	37.3165	25.9275	28.6843
2210023G05RIK	74.2529	68.9676	64.9325	78.1695	73.3651	78.0379	37.5415	26.1174	28.2462
2210038L17RIK	73.4253	76.5528	63.1443	92.9747	89.5401	83.7032	42.6292	31.5796	32.7263
2210402C18RIK	110.222	73.7565	71.5486	144.976	110.484	107.13	57.5674	42.2479	41.3308
2210403B10RIK	58.2575	72.8964	60.1557	59.5179	68.9673	64.5836	34.8471	30.558	23.1195
2210404D11RIK	291.517	269.736	123.434	480.356	472.079	389.742	171.281	114.975	128.661
2210404G23RIK	67.3684	72.8569	61.6495	109.845	101.883	112.326	44.8968	33.3324	37.1783
2210407C18RIK	70.5528	53.4879	58.1097	65.5352	72.0496	66.1433	32.2349	25.3768	31.2265
2210407G14RIK	60.4562	55.2757	54.6524	63.4162	75.837	64.5256	35.6248	26.4889	27.7376
2210409E12RIK	66.0018	62.3835	61.3172	69.2536	64.2101	55.8078	33.033	27.4952	26.0881
2210409M21RIK	87.0213	96.8447	63.3673	139.088	161.405	157.746	55.0916	37.4274	36.1027
2210412D01RIK	567.768	381.97	210.53	871.952	996.13	944.07	249.031	234.858	214.196
2210412K09RIK	361.312	416.204	199.363	859.236	876.523	654.9	197.429	142.131	116.321
2210413P10RIK	77.3975	69.5926	60.771	71.8525	73.8799	67.6262	34.0863	27.1997	26.9058
2210413P12RIK	70.1619	74.7955	53.5532	63.6738	66.8395	105.648	33.3955	30.0831	26.8706
2210415M20RIK	897.549	742.368	500.195	1837.28	2177.27	1674.78	735.735	419.21	397.808
2210417D09RIK	73.6192	68.9586	53.7313	65.4392	70.1846	66.1617	33.124	31.5552	29.7392
2210417J20RIK	60.4728	58.3163	48.6184	64.0603	75.3621	67.6023	33.1601	24.5095	26.3605
2210418O10RIK	1447.39	1105.95	483.814	3099.12	2873.36	2601.86	965.553	459.26	487.223
2210421G13RIK	69.4287	57.5132	55.1403	95.4659	89.6959	85.8948	44.2035	33.5418	32.2901
2300002D11RIK	71.0327	63.4837	58.2091	65.2831	73.2777	70.8374	39.7941	27.8956	28.6968
2300002G24RIK	78.5777	62.7465	62.3658	71.2608	75.0385	76.2937	37.3484	30.4467	30.8987
2300002M23RIK	66.7354	66.3814	66.4675	72.0119	80.0228	72.7258	33.7417	27.7779	28.7524
2300002O18RIK	62.9551	59.2517	56.7373	82.5156	81.7671	80.7659	38.9935	30.8107	31.3372
2300003C06RIK	68.9573	59.7764	46.3995	83.9017	82.3359	72.3016	39.6795	29.9584	27.6972
2300003P22RIK	80.0027	59.3223	56.8787	168.307	109.745	95.0969	37.2657	31.7974	30.7289
2300005B03RIK	80.1836	67.9366	53.9073	63.5188	80.5945	77.6724	32.36	25.887	25.413
2300006N05RIK	80.9926	70.6671	51.0778	68.693	67.1917	71.8684	32.9524	29.4307	30.46
2300008B03RIK	180.648	172.67	84.8842	368.789	327.518	293.369	95.2618	69.43	70.5029
2310001A20RIK	489.452	332.433	276.559	670.022	735.696	646.035	166.842	138.588	149.645
2310001L23RIK	68.7257	67.2712	56.4916	90.5446	83.412	74.1917	38.4314	26.1312	27.1801
2310002A05RIK	66.684	57.7743	53.5765	71.8019	73.2657	69.4526	31.5738	22.7481	27.9028
2310002B06RIK	193.518	169.267	118.637	146.54	132.094	122.757	61.0762	47.558	94.6153
2310002B14RIK	74.9295	66.1331	58.4132	58.0056	66.0206	61.4244	31.2651	27.4756	29.2859
2310002J15RIK	67.7712	58.8952	60.8152	65.7414	68.6033	72.6823	26.6818	26.336	25.088
2310002L09RIK	68.3694	66.268	58.8802	66.0119	70.2445	70.1233	36.9176	29.263	29.6319
2310003C23RIK	193.856	220.891	119.094	351.326	361.793	314.031	153.513	93.8748	101.936
2310003F16RIK	1290.04	1052.47	715.702	2493.41	2547.87	2304.81	926.826	576.618	588.428
2310003H01RIK	196.624	147.08	114.97	259.536	270.551	244.008	98.5565	85.9406	95.6295
2310003L22RIK	151.871	138.284	96.9442	360.404	359.011	327.689	96.7519	70.0012	66.7855
2310003P10RIK	330.717	325.853	207.722	568.267	501.576	461.668	146.388	134.861	141.698
2310004I24RIK	321.283	260.325	192.383	517.281	524.178	431.586	156.413	133.827	109.393
2310004L02RIK	309.481	245.299	107.831	692.317	603.67	553.329	87.2855	113.888	110.547
2310005E10RIK	617.204	555.07	381.661	484.922	549.234	548.648	262.375	155.93	189.532
2310005G13RIK	69.0006	65.6119	60.0687	72.6741	81.164	86.444	34.0064	24.3029	27.154
2310005N01RIK	99.5481	83.3081	66.2171	120.553	153.867	150.918	54.8717	39.6404	40.2746
2310005N03RIK	790.893	615.549	357.321	1392.35	1310.88	1319.54	472.915	301.237	289.077
2310005O14RIK	194.348	177.141	144.713	191.343	216.148	190.686	91.9543	67.1359	70.8026
2310005P05RIK	86.0197	53.925	63.2603	72.3062	84.9584	72.3018	36.4532	31.4469	28.106
2310006J04RIK	159.812	157.534	92.5889	168.879	190.072	151.581	53.2394	80.0705	61.2009
2310007A19RIK	83.3839	68.9766	72.0365	137.386	107.957	114.764	25.6547	31.6217	29.9021
2310007B03RIK	72.1447	72.1085	54.9124	70.4932	84.1869	87.5572	41.0211	28.8438	27.4965
2310007F04RIK	68.4326	62.5341	60.8827	70.6805	67.4444	68.745	32.9156	26.6435	30.6318
2310007F21RIK	688.788	499.241	264.994	1031.15	904.375	724.94	241.626	215.557	200.636
2310008H04RIK	84.519	67.9146	63.5009	140.746	139.181	147.714	43.5849	32.3156	31.649
2310008H09RIK	169.78	155.368	113.247	238.388	249.992	249.891	84.4112	60.914	49.0264
2310008M10RIK	3641.34	2598.71	2109.56	2661.55	3207.24	2894.77	1397.59	940.555	970.485
2310008M20RIK	115.888	124.067	108.275	160.49	159.179	164.549	51.7255	38.1574	44.0523
2310009E04RIK	73.5365	65.2799	61.0744	73.5178	65.8251	67.1783	30.8736	25.9692	28.219
2310009E07RIK	154.326	138.888	131.858	210.428	172.408	163.015	50.1896	49.8791	47.4323
2310009N05RIK	427.431	422.971	203.307	909.728	851.142	646.092	121.255	204.757	165.53
2310010B21RIK	165.122	154.694	99.1709	283.006	256.584	250.715	65.2342	66.448	62.0573
2310010G13RIK	93.5441	82.2337	67.5445	150.745	149.447	147.232	53.0683	41.6529	40.2739
2310010I16RIK	57.6528	57.7236	54.4609	98.7777	81.2559	84.7488	34.1707	25.5622	27.2092
2310010M24RIK	238.849	218.06	92.8823	372.686	364.276	310.566	100.52	120.662	147.956
2310010P21RIK	72.6353	66.553	52.9521	70.6504	69.4508	70.3674	31.0508	28.5979	27.1918
2310011J03RIK	136.302	131.042	84.2619	186.531	179.589	157.519	71.5065	61.615	51.7041
2310012P17RIK	73.7676	82.1627	59.9768	99.6583	103.255	100.304	43.9714	35.5752	38.5605
2310014H19RIK	254.819	213.41	124.422	336.588	323.863	281.127	63.3241	84.967	70.8836
2310014L17RIK	71.6139	80.5786	71.7463	98.5694	115.853	101.544	34.705	29.1445	32.7767
2310015J09RIK	71.2919	62.791	60.9134	90.7231	107.388	90.7369	53.5342	26.2222	34.2204
2310015N07RIK	116.044	117.281	97.9155	164.866	161.722	179.78	78.5562	49.9409	54.1576
2310015N21RIK	388.149	258.14	185.435	341.745	355.996	324.683	142.206	125.145	111.325
2310016A09RIK	60.8029	64.6839	53.5945	64.9114	57.9732	67.2272	34.8056	27.7461	26.7838
2310016C08RIK	299.884	259.372	153.166	456.529	443.475	386.955	150.98	113.359	105.831
2310016C16RIK	68.9507	60.9029	63.695	78.3273	79.6883	79.0473	34.2303	27.7157	28.4533
2310016E02RIK	1398.72	1235.04	720.895	1690.74	2102.63	1640.14	1023.12	561.812	566.173
2310016F22RIK	67.3454	60.4424	61.635	82.0845	70.4072	80.3205	37.7517	29.459	25.6884
2310016K04RIK	95.8886	104.51	66.4164	1047.64	997.147	794.107	196.559	49.7969	50.0467
2310016M24RIK	1735.82	1291.46	831.095	2282.45	2256.79	1973.74	864.083	463.253	500.823
2310016N21RIK	64.6972	55.6604	53.3713	64.4264	77.5422	75.0251	28.4487	30.4617	27.4937
2310020A21RIK	63.0926	71.4502	56.7527	70.982	65.7643	68.069	32.9975	29.4958	26.6959
2310020H19RIK	981.992	774.513	688.76	1131.6	1157.61	983.108	446.174	287.612	272.189
2310020H20RIK	2379.37	1469.64	1257.34	2473.22	2562.84	1951.77	948.606	579.968	528.901
2310020P08RIK	95.0196	89.91	64.9602	126.924	125.202	113.884	39.504	35.9753	32.1185
2310021H06RIK	68.1628	63.9381	62.3442	70.6477	73.6877	71.1648	36.3394	29.0511	30.9818
2310021P13RIK	208.574	178.878	98.3723	454.103	419.145	306.296	93.1603	88.106	81.2549
2310022A10RIK	78.2989	71.434	62.9206	129.907	128.895	117.46	52.9655	37.0622	37.0593
2310022B05RIK	177.997	166.769	136.824	221.79	243.857	186.779	79.6773	80.8062	63.7232
2310026E23RIK	57.8476	62.8698	58.8822	66.6604	72.7127	66.0158	32.7297	26.1632	29.692
2310026J01RIK	83.688	83.7985	70.6299	71.6098	86.3467	75.0668	37.3065	29.178	29.0203
2310028N02RIK	77.0555	68.4408	54.9383	83.7806	79.8531	83.5008	33.7872	28.4094	28.0524
2310030G06RIK	60.0572	55.8889	62.9693	65.6256	64.7054	72.139	32.7222	29.2068	29.2955
2310031L18RIK	78.082	77.0809	62.5295	93.9409	114.458	117.344	41.4778	36.206	35.4747
2310032D16RIK	238.234	248.641	142.518	466.644	408.125	428.661	76.7829	81.945	96.8324
2310032F03RIK	80.7277	73.463	57.0386	74.828	84.6876	76.9871	39.1975	34.0611	29.0008
2310033E01RIK	82.8288	74.312	74.1781	86.0408	81.5834	85.0639	34.7273	32.3751	30.4119
2310033K02RIK	79.9582	73.7125	55.7286	65.7003	65.1989	65.7021	32.5673	28.5664	25.8928
2310033P09RIK	213.815	160.802	106.391	282.363	274.962	269.519	89.0951	57.6598	65.2934
2310034C09RIK	75.8499	65.4146	62.593	78.6733	77.0455	76.2306	40.3853	28.1091	29.0624
2310034L04RIK	132.343	150.647	99.7586	160.336	125.041	113.371	42.2791	55.6954	36.3154
2310035C23RIK	106.102	102.386	79.5095	124.868	134.118	125.48	37.3077	37.7258	36.3425
2310035K24RIK	136.34	135.144	96.5323	186.168	203.829	184.883	67.3052	53.8833	50.3946
2310036D22RIK	262.178	249.472	120.011	483.037	471.091	428.462	78.2627	122.546	91.3759
2310036O22RIK	3103.39	2343.75	2188.58	3335.73	3292.99	2779.44	1179.12	932.858	863.306
2310037I24RIK	601.128	450.049	293.025	1048.55	1019.65	896.318	276.81	285.511	251.537
2310037P21RIK	63.819	74.0157	47.7643	64.7243	70.4849	63.4262	30.1808	23.0628	25.8114
2310038H17RIK	77.2193	78.7492	58.492	100.731	101.697	98.3229	45.3218	32.8141	33.3904
2310038K02RIK	76.6273	76.2286	59.5609	79.3456	90.6948	71.1621	37.2104	32.8347	28.3773
2310039E09RIK	76.7251	62.6509	59.2691	71.3164	81.8629	69.6151	35.8118	28.8338	29.5051
2310039H08RIK	712.482	481.504	470.61	2098.82	2031.95	1683.44	448.874	198.33	185.893
2310040C09RIK	90.2986	87.6291	61.883	183.416	182.849	151.23	39.5373	46.7008	37.2226
2310040M23RIK	60.0091	67.7477	57.1997	74.664	81.48	84.6797	37.7289	27.9236	30.2281
2310041H06RIK	2167.08	1690.25	880.162	2158.21	1753.24	1791.11	619.187	416.204	438.981
2310042D19RIK	58.7335	73.2934	59.2551	173.622	169.354	157.848	36.3287	21.8901	27.0462
2310042E22RIK	75.3105	71.8461	57.0999	94.5738	92.6251	89.0481	39.2	34.492	28.1739
2310042G06RIK	2604.54	2057.67	1250.02	3476.76	3766.73	3874.2	1152.74	784.756	721.743
2310042L06RIK	256.977	215.115	174.762	982.408	952.55	792.639	146.993	114.234	104.799
2310042N02RIK	89.9226	67.866	67.7326	76.7538	86.1055	87.1011	37.9849	28.5863	30.8445
2310043K02RIK	51.2293	47.6783	45.539	64.6334	73.6633	60.3847	38.0446	28.6722	31.7498
2310043L02RIK	68.151	68.2428	60.2207	71.798	81.9287	78.5356	36.0565	29.3114	32.0435
2310043N13RIK	128.027	114.3	89.8693	144.939	163.307	141.38	54.7328	46.2872	44.4023
2310044D20RIK	64.3777	67.3696	61.7442	64.0107	74.4004	72.5338	30.2562	25.7335	26.213
2310044G17RIK	368.173	301.941	225.679	445.95	496.817	444.62	128.797	104.983	96.2961
2310044H10RIK	1385.79	837.317	481.673	2191.05	1918.63	1842	516.038	431.905	395.346
2310045A20RIK	79.0427	64.4389	55.6521	68.2429	68.6997	68.2431	37.2337	29.2416	25.2333
2310045B01RIK	188.489	127.429	104.674	287.722	325.962	298.414	116.61	66.0855	65.7232
2310046G15RIK	66.7317	57.4814	56.0169	72.068	73.7091	72.5911	29.9212	23.8336	24.7826
2310046K01RIK	84.7839	59.6523	59.5274	73.3095	74.0978	77.0533	38.7562	32.4561	31.3162
2310046K10RIK	315.837	334.89	166.296	965.195	759.768	883.272	191.756	132.869	76.3905
2310046O06RIK	118.426	97.4593	70.4201	158.565	154.145	138.143	45.8515	56.8199	41.6457
2310047C04RIK	115.823	115.504	78.2789	99.9292	105.237	104.728	47.2651	47.0332	37.5207
2310047C17RIK	76.8537	59.4213	57.7435	92.3469	77.9283	74.9012	39.5281	28.3713	25.7361
2310047D13RIK	93.221	83.1596	74.2495	91.1576	84.6359	95.2081	46.6549	39.2137	36.5038
2310047H23RIK	1517.14	1647.98	581.313	4363.5	4521.2	3429.82	1021.79	710.094	652.939
2310047I15RIK	137.566	114.007	98.4359	145.291	179.281	150.541	51.5137	46.6703	53.1634
2310047M10RIK	233.025	154.588	97.8184	297.954	242.872	197.189	110.883	70.4721	83.2979
2310047O13RIK	121.844	100.425	73.2001	173.274	192.361	171.263	51.6906	52.134	42.8492
2310050B20RIK	186.469	154.445	116.515	229.894	253.194	245.421	114.897	68.5854	70.6974
2310050N11RIK	60.7278	53.6596	52.9805	64.3039	65.8368	61.607	31.487	25.3811	25.9764
2310051D06RIK	80.7421	88.555	68.1389	94.6734	118.617	96.1228	47.2075	33.0935	34.6827
2310051M13RIK	54.2379	47.0818	46.0204	55.1007	55.9265	62.4672	36.9391	27.2386	28.7335
2310056P07RIK	315.751	275.831	217.581	702.134	934.963	937.53	184.22	148.181	144.03
2310057D15RIK	361.123	324.958	207.456	671.076	755.586	666.592	200.409	165.595	165.604
2310057G13RIK	155.234	129.057	99.7749	296.84	335.442	334.376	84.4549	60.0998	64.2748
2310057H16RIK	61.0037	70.1048	52.6055	99.0259	78.8213	75.5323	30.9459	29.2636	27.2925
2310057J16RIK	64.5339	69.0752	53.9871	78.6712	73.5972	79.6659	31.3579	26.8187	33.047
2310057J18RIK	62.6933	69.9815	57.8547	65.3162	68.7567	73.5965	31.9913	27.212	29.5963
2310057M21RIK	74.0766	79.5232	63.1011	75.301	71.31	73.0614	35.2772	24.8141	29.042
2310057N15RIK	68.2526	68.218	57.5769	58.9658	56.6385	58.7495	29.4669	27.9974	27.8388
2310058A11RIK	94.9168	112.205	68.1629	200.398	240.953	193.718	51.1519	34.2409	38.1379
2310058J06RIK	71.3111	67.0184	62.2712	62.9686	76.6109	75.1786	32.9063	23.3114	28.9687
2310058N18RIK	46.812	47.854	41.9932	64.4107	68.2648	61.0903	35.9072	31.1691	24.6559
2310061A22RIK	100.223	102.274	80.0177	109.197	106.148	104.305	49.9703	49.1746	42.5439
2310061C15RIK	162.849	131.875	90.9378	251.076	336.258	268.156	101.632	72.8815	80.9363
2310061F22RIK	353.834	306.829	159.48	375.236	354.575	339.922	116.864	110.319	104.267
2310061G07RIK	74.8952	76.3316	59.6682	83.5391	79.3798	75.8285	34.6585	28.7355	29.6933
2310061I09RIK	69.9932	75.9106	61.4232	95.3494	100.936	103.746	46.4141	33.2828	46.6794
2310061N23RIK	136.998	165.232	141.158	1171.4	1154.06	1225.36	64.7634	71.9096	70.0276
2310065K24RIK	442.272	332.909	175.167	965.544	911.771	910.67	305.663	200.683	208.33
2310066E14RIK	192.487	222.628	112.775	448.86	399.605	308.458	80.5417	102.925	72.9225
2310066I18RIK	75.7396	67.117	56.9411	74.5331	77.9165	81.3426	43.6127	26.8963	30.0767
2310066N05RIK	939.64	743.521	548.087	1173.17	1185.37	1086.04	386.728	308.589	261.813
2310067B10RIK	126.312	130.588	93.036	121.479	120.277	120.508	64.1035	43.9108	50.7211
2310067E08RIK	79.5124	75.365	71.1691	169.459	137.776	216.522	47.1377	34.2965	40.4142
2310067G05RIK	124.864	89.7199	86.2875	162.168	149.22	144.733	52.5018	48.7776	45.2107
2310069I04RIK	284.057	228.289	172.122	274.746	287.911	305.534	87.3249	72.7855	84.0709
2310069N01RIK	85.396	62.4416	60.0782	68.5095	76.9158	63.0769	35.6538	26.6233	33.8667
2310069P03RIK	104.893	96.0733	77.3463	126.295	134.882	145.91	50.8015	41.602	52.7342
2310073E15RIK	198.678	123.953	92.0631	367.88	324.363	279.652	92.2106	73.62	56.3279
2310075A12RIK	451.43	297.365	135.617	915.619	1129.65	914.804	230.583	229.129	198.741
2310075C12RIK	65.8984	68.2741	65.3288	55.8635	59.4008	65.2181	31.3562	25.5319	26.475
2310076L09RIK	67.5573	59.1302	50.093	77.2349	74.8736	71.6444	32.0346	27.2847	24.4972
2310079F23RIK	97.4961	83.4854	64.1802	100.7	95.6062	80.4874	33.9594	27.5598	32.3177
2310079N02RIK	568.029	319.465	184.051	406.758	429.044	386.761	164.472	119.283	141.575
2400001E08RIK	408.688	264.262	148.888	708.904	796.051	695.301	226.041	192.787	180.792
2400002F11RIK	69.3241	64.834	61.9653	69.3444	68.4652	67.4194	36.7575	30.5312	27.1462
2400003B06RIK	1441.26	1121.99	555.064	2066.53	1989.59	1924.93	874.757	619.218	614.998
2400003C14RIK	1224.88	946.036	662.405	2538.13	2180.13	1871.47	473.27	526.869	466.036
2400003N08RIK	1932.25	1746.84	1173.53	2498.05	2518.29	2336.31	1050.95	848.504	765.16
2400006A19RIK	134.902	116.356	80.4639	349.618	395.517	366.927	101.648	66.3694	68.4227
2400006N03RIK	141.527	109.663	77.4127	197.894	211.47	168.123	63.1591	49.4615	41.4377
2400009B11RIK	98.9504	89.3418	69.4657	93.51	95.0758	97.4405	41.3464	39.0665	34.8938
2400010D15RIK	1105.13	916.866	446.509	1916.11	1451.27	1366.09	285.475	323.854	271.081
2400010G15RIK	225.999	155.819	89.0649	341.135	336.111	270.126	67.0923	67.7821	49.703
2410001C21RIK	521.438	430.942	177.106	958.378	923.121	847.227	264.37	243.811	224.276
2410001E19RIK	739.466	636.78	426.733	823.714	750.755	649.155	249.285	215.835	202.495
2410001H17RIK	429.005	324.324	285.485	636.333	638.131	534.422	246.605	139.869	150.625
2410002F23RIK	127.425	124.931	71.589	340.938	246.811	281.387	51.5933	53.15	63.7325
2410002I01RIK	115.186	100.266	78.9843	156.018	138.023	138.947	39.5176	40.3747	42.2311
2410002O22RIK	180.281	176.361	108.491	278.322	321.151	251.405	85.9964	80.1082	74.9538
2410003C20RIK	70.4619	76.2377	58.0739	99.4834	112.42	108.856	44.4626	35.3978	38.2897
2410003P15RIK	237.7	192.068	122.362	293.959	293.274	284.43	90.2457	83.4141	74.3403
2410004A20RIK	93.2113	86.0459	70.253	137.533	126.156	122.594	43.0003	35.1911	34.7439
2410004B18RIK	208.651	209.661	113.448	404.16	402.946	350.64	112.46	78.3266	79.6682
2410004C24RIK	112.413	116.251	87.4716	111.969	142.341	122.549	67.4991	42.5466	44.4993
2410004F06RIK	69.8645	78.6371	61.4305	96.2906	84.0533	88.7656	40.4368	34.2448	29.0139
2410004H02RIK	111.753	118.749	73.6259	159.359	194.81	182.49	62.2982	43.5341	44.0926
2410004J23RIK	69.2873	65.4242	62.7774	99.6514	94.9659	94.7415	36.7074	33.7752	31.5324
2410004L22RIK	236.435	234.654	181.507	211.97	258.094	210.267	123.232	86.47	90.5312
2410004N11RIK	366.344	254.709	201.857	473.805	507.84	441.974	166.614	154.08	138.101
2410005H09RIK	102.306	72.895	75.7798	88.746	97.1189	89.5873	44.4296	32.6591	29.921
2410005K17RIK	821.332	754.778	445.258	896.925	822.867	811.307	432.562	247.537	265.602
2410005K20RIK	573.729	618.654	401.61	686.11	939.431	895.267	267.793	243.903	180.195
2410005O16RIK	80.6812	85.4887	67.4147	142.178	148.276	127.852	36.5881	38.488	38.305
2410006F12RIK	290.216	260.866	178.361	396.478	405.809	425.58	104.277	95.8367	99.1089
2410007P03RIK	79.4738	66.9025	60.8757	113.797	101.117	110.98	38.5035	29.9899	29.912
2410008J05RIK	117.487	114.142	64.1846	135.265	106.365	217.145	61.766	35.1994	56.7384
2410008K03RIK	78.93	67.9147	52.9563	76.3028	69.683	66.6687	37.1317	26.2077	26.6228
2410011G03RIK	723.669	731.541	487.964	1000.94	1219.94	1293.06	452.976	295.286	328.197
2410011O22RIK	279.32	265.93	179.698	316.023	321.845	295.909	94.1936	78.0413	98.0767
2410012C07RIK	90.1217	77.6671	61.8901	74.5038	76.2015	79.1394	36.4231	28.6479	26.9698
2410012H02RIK	66.8784	70.6089	63.1724	71.9021	78.221	77.0063	33.4762	30.2201	24.7378
2410012M04RIK	69.4389	74.6757	59.7786	171.74	190.815	188.803	53.6151	41.2695	36.5502
2410014A08RIK	150.492	110.568	76.5957	146.588	149.101	153.806	66.6871	47.364	48.7777
2410015A16RIK	140.033	99.9552	70.1962	326.14	231.966	272.248	37.9416	81.6325	51.3057
2410015B03RIK	115.293	107.963	94.5659	116.557	128.8	118.588	46.6243	41.2854	43.5089
2410015M20RIK	254.272	219.515	114.111	636.557	712.58	640.903	251.737	132.534	148.619
2410015N17RIK	234.449	259.782	143.613	538.666	904.146	909.665	410.954	160.16	185.933
2410016F19RIK	110.129	95.3532	73.4763	164.937	193.262	171.305	61.8258	46.4821	46.6445
2410016O06RIK	146.486	108.295	71.306	198.632	239.802	195.399	92.6385	60.3376	47.5815
2410017I18RIK	362.336	375.639	250.779	561.003	581.204	551.029	145.061	154.579	142.861
2410017P07RIK	312.815	277.422	230.066	288.656	373.658	285.794	114.665	102.402	102.667
2410018C17RIK	2002.55	1444.61	936.62	2393.23	2092.93	1860.13	560.503	554.34	462.652
2410018C20RIK	61.0164	59.5129	55.7989	75.701	76.5258	69.1477	33.792	27.2855	27.6251
2410018G20RIK	437.991	346.033	241.871	421.077	511.811	444.479	240.744	161.66	159.482
2410018G23RIK	463.435	392.611	242.968	666.71	862.763	663.432	257.541	241.197	217.44
2410018I08RIK	73.131	74.8026	62.5799	79.8106	74.7902	78.5713	36.4901	27.4907	27.4824
2410018L13RIK	79.1933	65.526	60.8794	66.5199	66.6098	66.3897	32.9948	26.8799	27.4146
2410018M08RIK	69.8998	69.0729	58.4075	67.8323	74.2913	61.2351	33.5454	22.3264	26.3176
2410019A14RIK	65.7761	67.0167	47.815	87.2292	113.232	105.579	33.0943	30.9706	36.746
2410019G02RIK	305.101	263.434	118.614	518.322	390.944	419.094	86.1575	102.543	104.391
2410022L05RIK	63.8344	62.0954	55.0269	70.769	77.2009	69.4409	33.9183	26.1493	26.2543
2410024A21RIK	538.38	559.726	260.893	1177.77	1007.37	916.666	147.925	233.959	176.588
2410025L10RIK	735.065	718.276	394.344	1324.22	923.53	846.447	148.707	215.411	211.087
2410030J07RIK	124.587	102.445	81.7498	241.292	215.036	178.136	37.3747	54.7351	40.426
2410042D21RIK	196.891	180.469	131.455	280.917	324.632	274.438	93.9776	80.3126	81.3683
2410066E13RIK	140.339	84.1319	96.8613	197.794	137.798	158.327	46.0298	31.8577	29.7257
2410075D05RIK	57.0932	52.13	47.1167	61.5299	63.8372	66.6522	39.1467	28.6028	29.4378
2410080H04RIK	65.362	57.1129	56.5927	60.1235	64.6182	62.8642	32.8646	26.0598	24.5996
2410080P20RIK	91.4785	75.5976	64.2148	230.819	214.539	234.852	54.9372	53.1556	42.9537
2410081M15RIK	80.9079	76.9425	72.4266	80.5298	85.1808	80.245	42.5028	34.0595	33.17
2410091C18RIK	87.7281	79.8959	63.6365	77.9066	92.0874	92.8414	42.0739	33.9952	34.3666
2410104I19RIK	4509.57	3745.55	2350.66	4455.21	5120.27	4633.73	1998.74	1482.94	1482.93
2410116G06RIK	78.9314	69.6525	59.7391	65.2764	68.9512	70.0281	34.2904	26.8436	28.871
2410118I19RIK	109.207	130.085	72.8144	208.424	220.544	226.763	66.0794	51.7366	55.7252
2410125J01RIK	84.2193	64.4712	57.6529	70.5431	62.3954	78.6662	34.1081	29.7252	29.2001
2410127E16RIK	60.1847	60.8489	56.5736	60.9933	67.3157	70.2975	28.8513	25.5783	29.5751
2410127E18RIK	1773.25	1298.61	798.792	1733.29	1701.12	1421.49	481.392	492.342	450.651
2410127L17RIK	104.577	105.131	63.5568	154.082	173.298	161.672	47.4888	40.5573	36.5809
2410129H14RIK	258.594	208.788	233.83	321.556	326.71	304.508	74.4339	80.4054	85.2544
2410137M14RIK	77.1354	68.5228	57.3126	91.5279	81.4074	90.8501	37.8241	30.535	33.8666
2410141K03RIK	72.0351	68.6202	68.7317	73.4158	79.4065	72.7768	37.22	27.7567	27.172
2410146L05RIK	62.5176	67.3261	54.4295	78.2643	87.9857	81.1138	36.0506	34.0071	31.556
2410166I05RIK	100.119	76.3161	65.334	100.541	89.2394	88.243	40.2189	34.2489	34.0936
2410193C02RIK	87.0308	80.8116	67.2862	101.662	99.0186	95.2052	44.3727	33.3881	33.1319
2500001K11RIK	1760.87	1177.24	699.417	1686.49	1564.6	1242.55	445.599	456.758	356.98
2500002K03RIK	199.18	202.934	145.669	419.713	457.547	407.865	150.017	86.5111	70.8376
2500002L14RIK	771.296	669.23	467.988	1323.95	1254.44	1062.96	289.531	259.725	247.596
2500003M10RIK	3455.52	2600.64	1827.42	3619.4	3754.61	3137.2	1556.65	1206.99	1071.95
2510001I10RIK	148.437	119.824	90.3228	188.444	171.923	153.325	49.0247	46.9026	45.0247
2510002A14RIK	136.112	108.584	83.26	221.485	211.799	202.34	68.6882	60.5841	59.1996
2510003E04RIK	174.24	147.32	92.7456	678.216	558.749	510.95	120.535	99.0661	96.869
2510004L01RIK	95.4619	77.9903	79.1639	347.896	265.486	324.015	55.6757	32.7514	27.8977
2510005D08RIK	220.716	201.661	174.452	269.146	326.397	293.875	172.869	83.8181	95.7132
2510006C20RIK	85.3355	83.4858	59.8837	111.347	129.785	123.662	47.056	31.6768	32.803
2510006D16RIK	2352.19	1660.69	1112	2667.27	2402.41	2473.26	975.777	767.383	748.93
2510009E07RIK	233.102	183.341	115.731	140.901	151.195	123.049	110.984	77.4232	85.3852
2510010F15RIK	245.709	202.937	154.025	407.109	407.357	386.164	112.815	84.9147	84.1493
2510012J08RIK	333.995	249.299	148.005	906.116	857.219	694.261	122.011	155.258	135.406
2510027J23RIK	69.4969	61.9285	51.1221	81.9535	79.2096	90.5179	33.6309	28.1661	24.7087
2510027N19RIK	2186.69	1491.88	1140.71	2124.78	2315.48	2100.99	999.953	673.954	814.04
2510038A11RIK	115.303	91.0536	70.9425	119.991	157.758	134.512	53.5549	43.6026	41.6964
2510039O18RIK	331.318	344.037	124.859	527.221	442.137	397.819	125.377	108.363	90.9934
2510040D07RIK	75.6849	69.3114	57.1139	84.3965	102.912	88.5451	33.5241	27.1928	29.938
2510042P03RIK	57.5192	64.0845	54.2052	65.1919	78.8131	70.9783	36.7336	32.9582	33.3757
2510048K03RIK	206.668	198.767	120.412	305.214	294.061	259.51	93.9223	73.8537	91.9582
2510048L02RIK	69.3388	66.0736	54.1088	78.1567	97.1127	77.3	34.4087	25.3699	25.8919
2510048O06RIK	2996.55	2313.32	1594.48	5119.37	5554.77	5487.94	2291.82	1119.2	1222.87
2510049I19RIK	70.6166	78.9006	63.4335	116.077	106.412	90.8436	47.0571	39.976	33.109
2600001B17RIK	166.971	180.272	101.447	280.955	324.117	324.996	78.8237	66.8632	58.9061
2600001J17RIK	280.393	356.009	261.063	347.134	357.836	362.444	160.027	114.232	120.507
2600002E23RIK	629.35	505.947	264.05	485.69	541.142	444.786	266.86	180.217	187.702
2600003E23RIK	74.2219	74.6346	62.5048	74.5585	78.2275	76.3367	33.1662	28.6475	30.5219
2600005C20RIK	110.51	108.695	76.928	182.134	200.899	220.964	54.3548	41.3407	39.2843
2600005N12RIK	345.826	308.522	169.411	452.131	471.125	437.239	136.913	126.328	135.598
2600005O03RIK	87.0902	85.641	74.121	148.388	167.144	178.035	57.8179	36.27	35.414
2600009E05RIK	1050.24	738.822	501.955	1682.51	1662.27	1489.28	481.102	317.446	359.941
2600010E01RIK	53.3663	54.4861	49.3646	79.0875	88.5467	75.7938	38.3395	27.0294	32.8228
2600011C06RIK	54.3832	57.2078	64.8986	76.5602	86.1135	79.8667	34.4918	26.0853	27.2146
2600011E07RIK	66.5062	65.1399	56.0985	92.3441	86.6026	90.9427	38.7206	27.8234	26.1668
2600013N14RIK	241.794	205.722	134.655	462.973	495.079	432.799	146.882	111.705	89.0084
2600014C01RIK	68.7235	50.8364	56.0384	64.824	62.4477	59.2147	32.1823	23.5709	27.3908
2600014M03RIK	137.523	115.654	101.898	121.727	118.739	105.972	40.5862	37.2824	32.9952
2600016J21RIK	150.94	126.414	85.0931	132.626	145.911	152.522	58.6742	43.9926	43.1095
2610001E17RIK	53.9005	51.7339	41.6689	51.6603	53.8846	53.1843	31.1811	24.1726	25.936
2610002J02RIK	387.815	347.392	230.476	577.139	615.451	537.522	185.2	124.555	140.393
2610002M06RIK	538.33	559.594	257.198	571.994	637.169	600.962	272.354	156.527	141.835
2610003J06RIK	222.077	181.049	132.64	349.756	361.402	330.784	100.001	95.9171	87.3837
2610007K22RIK	2500.59	2692.03	1779.25	2930.39	2545.53	2508.7	822.714	1149.21	1028.62
2610009I02RIK	194.799	175.28	131.193	146.8	189.82	141.604	62.1837	49.8632	63.2279
2610012O22RIK	115.054	116.467	78.8686	293.8	405.522	374.51	132.279	85.1745	66.6295
2610014H22RIK	818.537	654.165	622.112	860.413	646.765	556.058	174.001	202.69	160.777
2610016F04RIK	836.771	706.682	306.26	1843.43	1950.66	1676.99	339.804	380.331	371.943
2610018G03RIK	63.4436	53.7598	59.7065	77.7816	71.1475	75.2434	33.1128	23.2055	26.2469
2610018L09RIK	299.233	235.092	152.365	361.506	410.515	408.275	178.346	92.596	88.164
2610019A05RIK	103.402	97.6357	68.4132	124.712	173.56	129.105	45.4366	34.4435	37.0045
2610019F03RIK	525.717	575.857	236.42	257.896	137.897	214.87	96.3592	267.178	284.455
2610019I03RIK	130.619	119.594	105.097	119.072	169.926	153.266	87.8327	50.3664	54.7594
2610019N13RIK	803.922	579.153	443.87	545.724	602.844	545.788	187.082	183.001	172.069
2610019P18RIK	61.5041	71.5665	54.1309	123.78	145.783	140.66	41.9588	29.5492	33.243
2610020C11RIK	223.72	206.997	152.272	295.77	252.211	240.012	49.9939	66.7618	55.5022
2610020H08RIK	81.9632	83.3355	62.7365	101.484	102.35	96.5308	33.8832	29.9642	30.3959
2610020H15RIK	193.877	190.547	134.022	320.818	313.518	265.813	91.4385	70.3848	65.0236
2610020N02RIK	125.654	88.1545	81.2024	283.305	304.516	275.557	63.6721	64.1128	48.7671
2610020O08RIK	721.425	810.269	402.336	853.085	869.459	632.066	340.019	289.283	315.581
2610021K21RIK	79.9702	82.0458	64.7144	87.0851	90.4854	93.1225	41.0317	34.7332	35.8351
2610022G08RIK	84.8304	78.1258	67.3781	78.5247	66.0683	70.9792	32.4275	28.5613	31.1238
2610022K04RIK	466.151	328.27	215.896	770.419	677.254	589.808	169.174	156.731	152.187
2610024G14RIK	328.582	269.49	165.515	385.759	441.717	425.223	136.848	121.984	105.193
2610025M23RIK	75.137	65.5016	55.0716	65.4339	58.7695	70.8002	31.4842	27.4968	26.4129
2610027C15RIK	192.698	134.189	112.245	289.955	270.803	231.678	80.4449	68.9816	72.793
2610027L16RIK	64.5938	73.1423	66.3367	225.626	215.837	233.126	51.5041	38.2236	41.5671
2610027O18RIK	65.5002	68.8214	61.1334	61.3095	66.2531	64.4499	31.0574	26.7007	28.9784
2610028H24RIK	75.039	62.6392	63.6053	70.2053	68.0854	63.4384	31.345	25.3335	27.4388
2610028L19RIK	419.726	345.617	216.816	538.358	602.003	526.955	227.428	170.016	161.512
2610029D06RIK	254.563	225.626	130.391	322.375	276.842	257.397	84.9561	80.3325	68.7144
2610029G23RIK	251.638	242.281	158.284	286.695	383.77	367.09	107.058	83.1804	84.0521
2610029K21RIK	92.6413	79.3394	68.4633	224.492	274.067	294.491	49.7288	45.331	39.7992
2610031L17RIK	364.17	281.144	103.989	1086.06	987.697	901.916	307.693	190.455	208.906
2610033C09RIK	521.979	394.149	238.729	580.723	550.789	537.967	169.944	152.476	146.068
2610033H07RIK	229	202.438	123.055	623.24	669.502	606.31	138.419	131.657	136.528
2610034B18RIK	66.3016	56.8544	54.0565	58.7333	64.8775	68.3296	32.3259	22.9483	26.6671
2610034E13RIK	79.0782	74.2153	63.5762	81.8126	85.0502	87.9292	36.4233	29.2955	30.5122
2610034H20RIK	87.5109	84.8682	66.7026	84.0954	83.3778	96.8583	45.0723	33.3907	35.6775
2610034M16RIK	97.4572	76.2178	79.3153	75.9439	74.9517	73.9723	34.4811	26.5259	27.9758
2610034N03RIK	65.4208	62.9645	53.1323	88.3047	104.144	97.0709	38.9394	29.6961	34.2468
2610034N24RIK	550.787	379.801	366.932	634.302	615.068	525.424	227.53	198.422	176.442
2610036D13RIK	228.45	169.349	151.67	254.476	253.835	242.326	114.034	81.0362	90.636
2610037M15RIK	58.1652	53.4321	57.7462	55.7029	65.1035	57.3406	32.9207	24.6933	28.1512
2610039C10RIK	1733.07	1387.72	1022.62	1924.12	2239.09	2012.25	1040.02	505.154	518.201
2610039E05RIK	173.411	160.567	78.2567	287.024	259.196	224.332	84.5631	52.3956	59.9475
2610040E16RIK	109.764	106.606	81.3745	97.1343	105.989	100.817	43.5378	40.5695	39.2963
2610041P08RIK	790.543	514.333	258.904	3769.96	3624.05	2878.81	608.26	589.818	552.539
2610042L04RIK	68.9053	65.2887	50.9334	73.7821	75.2787	76.7276	31.3928	28.9361	26.4566
2610042O14RIK	77.3659	79.3279	66.7909	112.181	120.172	107.991	34.7171	43.8864	39.2508
2610044O15RIK	134.026	125.034	112.751	385.666	343.522	326.604	77.4424	72.7673	75.3616
2610101N10RIK	1238.13	1194.66	664.48	1737.04	1613.02	1807.39	570.193	483.158	428.559
2610103J23RIK	585.306	545.042	254.674	1096.3	1173.74	1113.49	238.375	187.853	177.377
2610109H07RIK	64.1131	60.1255	55.0161	75.9319	88.8804	78.3242	38.793	29.3275	29.6686
2610110G12RIK	64.2781	65.996	52.3281	75.2063	75.4696	77.0138	30.9991	29.6642	27.5156
2610111M03RIK	211.789	204.987	138.553	331.66	344.452	327.733	86.6028	86.3001	72.4752
2610200G18RIK	69.0961	56.8028	55.7197	58.1794	65.3152	62.6014	40.0027	25.831	25.6437
2610203E10RIK	220.328	176.569	137.29	255.781	222.119	255.878	74.5016	64.8362	67.0061
2610204K14RIK	141.804	117.221	104.246	297.95	194.286	241.528	60.5625	62.2411	53.8673
2610204L23RIK	316.055	315.638	227.838	443.36	441.746	376.263	117.551	112.699	103.441
2610204M08RIK	66.6945	67.2472	57.272	75.1065	79.1748	74.9688	34.6228	30.2626	24.2091
2610205E22RIK	98.2587	86.3489	58.4004	147.308	146.803	144.232	53.3774	40.7766	48.5788
2610205H19RIK	140.561	152.565	75.6565	400.855	459.883	357.912	78.1129	63.0203	73.6225
2610206B13RIK	262.688	229.219	156.743	438.763	541.355	518.019	121.972	111.096	80.7117
2610207I05RIK	3707.1	3443.62	2029.42	3500.18	2889.61	2791.91	789.144	1221.57	871.575
2610207I16RIK	68.378	62.5768	60.8001	65.8066	74.1653	67.779	34.8437	26.3228	28.9978
2610208M17RIK	238.375	181.977	165.66	229.737	229.977	207.879	102.15	84.1985	87.451
2610209A20RIK	70.7455	57.0435	57.4171	87.1025	83.2504	82.6669	33.7304	31.1639	29.9711
2610209M04RIK	214.416	194.696	140.918	557.542	542.924	492.005	115.424	102.056	90.8066
2610209N15RIK	76.9279	71.1664	59.7773	108.079	113.053	127.04	37.7619	34.594	26.6599
2610300B10RIK	986.719	1071.4	927.169	1374.33	1763.33	1500.25	658.028	577.885	584.575
2610301B20RIK	82.2425	96.7093	65.7898	87.9355	104.433	87.6514	45.0396	34.2727	36.6625
2610301F02RIK	69.6493	64.4002	47.722	116.27	91.6114	94.1933	33.8452	30.367	33.8312
2610304F09RIK	782.271	517.519	185.598	706.359	709.385	628.315	267.132	245.9	240.804
2610304G08RIK	366.52	292.815	131.628	682.135	594.832	529.652	197.305	151.374	172.688
2610305D13RIK	81.6488	72.5473	72.1747	79.1881	72.629	84.2854	36.5307	38.8002	30.8693
2610311I19RIK	64.0397	72.75	58.1034	163.429	173.345	158.137	48.6232	35.8374	34.1226
2610312B22RIK	1049.01	941.412	680.96	1915.62	1877.57	1714.11	670.004	436.801	390.549
2610318C08RIK	152.111	106.048	101.257	255.421	342.974	278.898	98.1637	75.4189	78.0153
2610318G18RIK	158.686	158.2	81.5489	416.052	366.809	379.998	104.246	66.5405	70.4899
2610318I01RIK	155.477	158.523	150.948	70.7667	90.8811	73.3305	52.5427	65.9597	41.0799
2610318I18RIK	141.809	120.477	86.0853	225.41	220.959	194.775	50.7245	43.5779	43.2554
2610318N02RIK	85.9998	83.4058	68.1669	110.361	135.438	121.585	46.1681	39.4982	39.3718
2610319K07RIK	237.934	229.311	137.262	196.151	192.874	201.979	134.773	72.662	85.4838
2610507B11RIK	550.741	382.691	131.093	934.04	813.814	811.071	201.141	238.922	243.139
2610507L03RIK	103.101	114.941	99.9205	178.011	187.052	178.937	53.3897	57.7796	45.8888
2610510B01RIK	71.8923	73.7817	59.1592	63.6148	76.0444	72.8204	29.1744	26.9982	26.3677
2610510D13RIK	117.823	108.36	86.2543	209.255	224.375	172.48	41.8656	53.248	43.0451
2610510H01RIK	68.4831	81.2493	55.9125	102.252	106.771	95.3174	40.0119	31.5956	30.411
2610510H03RIK	66.7179	62.2852	49.716	76.5734	69.0034	75.8806	33.3531	27.4898	28.8473
2610510J17RIK	250.106	260.543	158.489	257.841	362.634	293.573	131.344	106.843	119.27
2610510L01RIK	487.952	374.536	308.427	376.349	552.308	420.865	296.371	106.557	129.998
2610511E22RIK	114.318	87.8624	63.365	132.839	144.17	141.305	64.0953	50.0072	50.9295
2610511O17RIK	256.55	222.841	154.085	458.813	651.76	668.516	179.335	138.455	139.741
2610524A10RIK	63.0764	57.4353	53.9416	82.7409	79.7085	86.1755	38.9296	32.9295	26.9645
2610524G07RIK	2734.84	2147.92	1552.74	3366.86	3553.38	3212.39	1391.49	939.301	802.798
2610524H06RIK	163.988	103.32	100.02	133.83	136.768	149.546	50.9783	47.4926	37.3992
2610528A15RIK	1392.91	1297.51	641.927	2151.32	2145.78	1865.62	689.894	566.545	519.205
2610528E23RIK	101.145	97.6074	88.9439	236.945	260.245	293.449	84.2483	52.9369	36.0092
2610528H13RIK	107.427	101.973	68.8584	194.905	198.814	180.232	59.0826	48.5601	49.8987
2610528J11RIK	77.1754	54.7004	59.8498	59.0408	63.069	67.343	30.5361	25.4549	23.7704
2610528K11RIK	229.207	149.287	114.901	360.706	240.644	312.344	42.5893	106.379	90.7103
2610528M18RIK	401.596	298.773	245.418	860.997	836.675	845.139	189.65	169.492	161.187
2610528O22RIK	613.937	501.335	299.291	1088.02	1086.28	959.847	171.996	219.515	220.214
2610529C04RIK	60.407	71.5792	50.5505	84.1064	89.5263	74.0072	35.8502	27.7317	24.8543
2610529H08RIK	78.967	68.2719	55.7321	81.1862	98.9591	85.1659	44.0289	29.9689	32.6805
2700007P21RIK	154.594	156.445	119.182	172.065	174.024	158.747	58.8398	47.6511	50.9614
2700008N14RIK	124.457	111.812	67.5521	126.111	109.305	113.899	53.2927	35.6127	47.1742
2700017M01RIK	1102.17	755.179	586.194	1398.87	1567.7	1334.32	399.424	375.266	327.781
2700019D07RIK	66.3454	50.227	52.3164	61.0887	71.8871	65.1997	32.5639	25.4834	28.2471
2700022J23RIK	58.1372	58.7768	54.463	56.1295	56.9549	64.5246	31.431	25.3183	28.0565
2700023B17RIK	1175.78	1039.83	521.296	1700.05	1791.52	1631.95	589.406	546.831	470.775
2700029E10RIK	327.171	322.573	219.628	544.245	451.685	369.754	96.9499	141.729	85.7062
2700038C09RIK	463.948	335.23	216.548	722.037	729.812	632.054	261.165	126.895	140.478
2700038I16RIK	464.276	420.509	257.941	653.047	621.829	483.544	155.941	161.922	154.711
2700038L12RIK	295.401	188.265	142.591	636.618	602.377	584.463	111.699	88.2267	99.3994
2700038N03RIK	78.3572	75.9503	66.7315	103.529	97.2346	93.6914	40.2541	30.5452	30.0674
2700049P18RIK	66.4812	74.9806	59.2775	82.3462	87.6081	89.2837	38.6354	32.0353	33.0521
2700050C12RIK	295.196	66.2226	56.6756	67.3455	74.3341	69.6746	150.969	27.466	139.618
2700050F09RIK	114.953	124.04	108.48	246.182	226.003	212.279	65.3968	67.0659	54.7902
2700050L05RIK	208.252	204.471	117.186	345.535	333.366	308.03	84.0957	90.5826	76.7337
2700050P07RIK	217.044	183.102	114.146	244.319	236.267	262.099	89.2175	73.9475	87.0537
2700055A20RIK	306.311	375.167	120.348	823.005	840.27	779.129	199.566	143.871	150.252
2700055K07RIK	75.9824	75.9407	61.1486	62.5085	69.8644	65.4726	30.1808	28.2315	27.596
2700059L22RIK	61.423	64.1337	51.7746	65.5483	63.5424	60.8308	30.9369	28.0511	32.9533
2700060E02RIK	4029.77	3066.12	2421	5718.46	6145.01	5696.94	2891.25	1864.52	1664.89
2700062C07RIK	165.45	160.128	129.761	275.087	273.644	257.138	93.4312	74.7058	62.0276
2700063G02RIK	67.1588	60.5071	59.3386	79.2821	80.9951	82.8306	33.9068	27.5373	29.6704
2700067E09RIK	1980.47	1827.62	923.141	4093.55	4171.04	3657.49	414.301	1287.27	763.52
2700075B01RIK	103.942	89.5177	65.394	105.247	118.176	110.537	44.2203	33.873	38.0753
2700078K21RIK	169.368	137.972	75.5926	209.862	188.471	205.449	66.1736	51.402	70.0974
2700081O15RIK	178.219	148.619	114.662	304.448	348.208	282.34	56.467	71.0667	63.6887
2700082D03RIK	1604.5	1561.76	1167.84	2052.32	1997.4	1875.06	761.389	538.367	596.444
2700083E18RIK	185.209	147.672	96.9735	164.155	173.816	142.898	63.1234	66.9752	59.2067
2700084L06RIK	1619.76	1160.43	845.464	1468	1329.34	1009.57	614.48	491.254	559.78
2700084L22RIK	167.902	171.637	157.611	486.775	650.246	467.661	130.657	91.411	91.3986
2700085E05RIK	80.4363	77.9162	64.036	118.485	130.474	121.702	45.6389	36.7387	34.1232
2700085M18RIK	121.785	125.217	75.8803	237.824	270.76	222.54	78.0029	58.6684	69.5798
2700087H15RIK	615.411	453.89	342.738	1027.85	894.81	828.522	126.278	232.259	160.769
2700088M22RIK	549.658	586.179	206.399	1130.72	1246.47	1169.25	288.349	169.655	156.348
2700091N06RIK	160.936	166.896	136.152	169.719	195.658	183.098	52.4662	49.2734	55.989
2700094F01RIK	187.459	168.949	107.051	247.374	264.432	255.914	90.8364	69.3927	73.6142
2700094K13RIK	2597.29	3009.35	1934.52	4212.23	6091.5	5797.26	2643.86	1337.56	1620.58
2700094L05RIK	325.777	255.008	106.957	656.504	675.038	590.741	219.657	166.64	160.039
2700097O09RIK	346.542	297.021	264.209	448.735	541.163	688.625	120.517	132.328	104.555
2810002G02RIK	80.5847	79.0064	63.0655	123.56	138.587	117.905	38.5691	29.8348	32.8046
2810002I04RIK	72.5357	61.2958	51.4062	68.4037	79.0341	70.91	32.8318	25.9555	25.5167
2810002N01RIK	260.883	210.744	148.89	387.112	492.399	463.054	110.165	81.0697	84.1712
2810002O09RIK	101.115	84.9781	66.2386	118.481	104.945	115.474	45.8764	35.6258	41.7704
2810003C17RIK	80.7893	62.279	56.8143	76.1574	71.1017	71.4335	37.9816	28.5313	29.7857
2810004A10RIK	61.55	72.5589	59.9481	56.6737	63.4044	56.1398	34.9893	27.1599	29.784
2810004N20RIK	262.951	253.799	102.504	302.646	394.668	400.809	136.602	75.1647	86.1555
2810004N23RIK	85.3936	85.1011	63.3509	122.899	137.262	137.865	46.5681	33.3297	31.7827
2810006K23RIK	76.5629	72.2007	48.6566	69.1464	58.6878	70.4176	29.2193	19.954	25.3952
2810007J24RIK	62.3489	56.7165	51.4412	58.6396	63.6155	55.2288	36.3251	31.7669	25.1543
2810008M24RIK	668.374	493.729	325.358	623.02	713.605	593.014	267.431	164.365	175.2
2810012G03RIK	395.719	393.224	227.6	569.296	539.451	529.826	136.354	176.371	135.109
2810012L14RIK	137.671	91.0214	94.8385	256.732	248.62	202.992	62.0467	71.7113	57.5267
2810021B07RIK	356.684	474.913	372.793	717.84	805.224	632.624	146.356	220.506	168.065
2810021J22RIK	126.938	124.606	92.5252	146.678	114.903	114.104	38.0304	45.191	45.946
2810021O14RIK	1380.48	1314.77	633.412	2124.16	2201.1	1751.37	678.365	565.131	457.434
2810022L02RIK	224.512	189.443	129.327	274.712	192.066	229.729	57.2784	84.3026	50.3533
2810022L20RIK	64.2719	61.4447	57.2602	74.8077	97.8466	81.4773	33.2833	26.7439	27.9117
2810028N01RIK	90.729	106.546	61.6343	192.31	255.256	251.823	62.9454	53.4324	57.3017
2810030E01RIK	87.8471	93.6931	83.8522	72.0587	87.6136	75.8382	32.7663	25.3116	30.0377
2810036L13RIK	877.776	802.419	487.577	865.694	1083.38	911.591	349.925	343.397	275.888
2810037C03RIK	1301.31	918.575	760.009	1566.38	1644.9	1435.87	642.535	382.261	374.603
2810037C14RIK	441.547	470.656	226.115	1670.21	1461.13	1571.93	320.748	292.084	169.891
2810038K19RIK	201.674	175.779	151.157	287.134	229.899	226.968	57.452	94.9101	75.9243
2810039F03RIK	71.8006	84.9919	63.0644	71.8821	66.9662	74.8077	38.3866	25.2344	29.3239
2810046L04RIK	1041.3	1022.91	618.44	1050.34	1044.88	883.934	382.602	365.142	317.25
2810046M22RIK	71.7716	73.6192	68.5594	81.1654	79.7837	80.8575	34.4977	28.7312	27.0055
2810047L02RIK	83.9681	93.6704	68.8293	103.431	99.4287	101.095	39.6175	32.7533	32.9632
2810048G17RIK	70.9008	66.1893	57.5509	81.0117	74.4711	65.2575	31.9622	26.5329	29.6313
2810052M02RIK	66.6453	71.233	67.9895	66.9025	78.7859	74.8948	30.8914	23.2971	25.4984
2810055E05RIK	263.774	223.124	146.491	454.084	504.505	420.154	137.762	96.5323	81.9553
2810055F11RIK	59.6091	63.5848	54.0127	58.9465	63.2356	76.3605	36.5041	28.134	26.9906
2810402A17RIK	60.3774	67.0157	58.7302	67.4652	72.6954	71.8526	37.4749	34.5182	27.7856
2810403A07RIK	2746.85	2691.5	1478.54	3802.64	3149.96	3046.78	617.995	1077.01	792.622
2810403P18RIK	86.9239	81.0254	60.604	89.7944	103.414	95.7253	48.4584	34.1776	31.3475
2810404F18RIK	111.819	120.63	73.4962	243.432	228.374	200.792	72.5529	54.364	54.3833
2810405F18RIK	835.091	611.093	502.949	1119.74	1003.25	861.464	208.829	243.27	212.174
2810405I11RIK	2659.95	2184.52	995.715	2785.01	2302.54	2057.86	722.013	621.417	619.9
2810405J04RIK	1045.92	631.839	407.002	1451.1	1522.61	1410.86	385.087	344.474	299.17
2810405K02RIK	67.3461	70.2097	60.9004	70.8349	83.0045	75.8361	33.9005	27.5888	28.2624
2810407K09RIK	136.586	102.046	90.648	170.058	155.248	146.477	62.4955	39.3786	42.5958
2810408A11RIK	82.1784	87.8371	69.0016	131.679	130.328	135.041	48.2534	40.0463	40.9136
2810408E11RIK	85.6675	71.4031	65.6508	94.0553	99.9938	96.346	37.7296	34.1601	34.2853
2810408M09RIK	103.155	87.2987	77.9057	125.691	145.256	141.409	55.0847	41.263	37.3307
2810409H07RIK	152.009	132.941	96.4361	228.831	303.273	279.562	80.6	62.2485	62.968
2810410C14RIK	74.8233	65.0786	57.4659	90.9621	88.7123	84.8385	38.3283	29.1674	29.4443
2810410M20RIK	1071.4	1010.62	739.611	1524.26	2100.49	1836.65	815.692	506.945	560.491
2810410P22RIK	101.117	132.172	76.9845	228.642	211.083	197.09	46.4616	55.5633	47.0461
2810413I22RIK	499.54	513.064	366.38	559.947	550.102	515.455	151.708	157.215	156.932
2810416G20RIK	69.094	59.9743	54.9809	68.5208	70.9481	73.348	35.3986	28.1737	28.6828
2810417D08RIK	70.426	60.5905	54.8043	67.629	68.0827	72.1335	32.1254	28.0069	28.8574
2810417H13RIK	787.777	683.984	471.504	734.37	1252.45	1352.94	578.722	364.354	472.007
2810417J12RIK	105.501	90.7748	75.2708	101.963	101.944	97.3575	46.3651	32.6935	41.2861
2810417M05RIK	83.3837	79.1525	71.7508	75.762	87.3325	79.6434	33.3318	26.8448	27.3911
2810422B04RIK	136.983	101.647	74.8526	374.884	395.188	392.693	67.4721	70.4454	69.5538
2810422O20RIK	99.5775	97.8355	69.6226	120.351	161.222	148.132	41.4892	38.4505	34.6287
2810423E13RIK	137.343	147.478	91.8211	275.804	224.164	206.266	67.8054	71.4928	72.5362
2810423O19RIK	63.0451	72.6184	61.1123	64.2759	62.5552	73.0306	35.7553	25.9507	30.0212
2810426N06RIK	73.632	69.2603	62.4977	82.2236	77.7271	90.2852	39.4687	27.9249	28.6159
2810427I04RIK	77.627	71.6829	58.6074	108.714	87.5431	90.7549	41.0682	31.438	34.711
2810428C21RIK	168.032	142.551	71.3945	321.922	338.969	324.737	77.1524	62.3242	61.9417
2810428I15RIK	346.449	301.65	233.091	572.352	837.815	673.823	315.88	156.493	194.04
2810429K17RIK	71.3044	67.9328	61.8612	67.3499	70.2538	66.047	38.6543	26.6306	24.653
2810430M08RIK	195.322	144.708	105.897	239.067	303.159	358.683	101.413	67.8769	70.0192
2810432D09RIK	1058.25	704.663	580.276	1236.99	1182.75	1008.75	554.209	265.273	291.166
2810432L12RIK	79.4367	62.6217	66.2983	76.5075	82.0981	86.1153	41.9963	33.2783	28.1329
2810433K01RIK	68.2586	62.2275	54.3665	82.0836	81.6417	73.3126	33.8695	32.4304	29.8724
2810437L13RIK	714.988	580.708	495.329	751.272	752.707	679.355	307.706	209.015	194.902
2810439F02RIK	66.2738	62.7828	57.7833	75.586	74.4645	76.883	35.8875	27.9786	28.8466
2810439K08RIK	104.883	91.829	72.7547	107.154	118.523	102.114	45.7306	39.2059	39.9236
2810439M11RIK	111.817	89.7805	71.1883	191.084	189.084	210.561	49.0387	42.6546	43
2810441C07RIK	83.6755	66.2999	60.6956	76.9989	87.0161	85.2653	33.7326	26.8327	26.2195
2810441K11RIK	184.222	127.414	104.544	242.385	280.111	235.94	67.0931	55.6988	54.284
2810441O16RIK	103.137	78.7442	68.6515	323.495	346.502	265.386	62.2711	56.4651	55.9947
2810442O16RIK	570.586	570.626	308.5	879.698	730.719	684.497	105.177	109.045	103.071
2810446P07RIK	113.967	127.449	74.8706	275.411	237.951	215.011	45.646	50.2348	51.0761
2810452K22RIK	178.303	165.514	131.746	207.844	256.035	244.234	115.355	63.3915	68.1496
2810453I06RIK	81.3916	74.7743	62.9339	129.485	120.082	128.655	45.7727	36.433	34.9905
2810453K03RIK	183.222	156.214	134.03	276.194	373.963	304.041	109.056	79.6825	92.6312
2810453L12RIK	218.813	263.096	141.752	246.321	227.335	202.154	84.196	74.5346	63.5018
2810457I06RIK	76.9276	64.3535	62.5544	68.9972	81.9078	71.3386	37.5837	29.1259	27.067
2810457M08RIK	139.445	122.325	80.047	311.423	291.691	289.885	58.7413	57.3455	61.2452
2810465F10RIK	59.7193	63.1162	52.4487	67.7008	62.323	74.3748	36.8354	27.986	33.432
2810468K17RIK	146.176	132.335	89.357	197.415	177.181	174.328	55.5652	57.6571	57.0417
2810470D21RIK	118.421	106.832	73.5262	176.254	168.677	176.285	42.7809	38.8624	48.2497
2810471M23RIK	65.835	66.0701	54.6758	51.2961	64.5649	57.9016	32.5682	27.1205	25.8532
2810475A17RIK	292.473	327.819	195.633	626.661	705.389	662.439	170.612	147.345	133.551
2810481F14RIK	177.716	197	112.045	278.651	273.744	256.794	44.1407	70.4386	77.7653
2810484M10RIK	60.249	65.5551	55.7899	69.7906	67.4203	75.4619	33.4381	27.8346	26.0548
2810485I05RIK	1931.29	1868.54	1197.71	2077.38	1748.38	1627.76	424.703	582.222	630.98
2900001O04RIK	205.842	167.095	96.3256	280.52	301.526	252.332	103.875	80.375	71.6092
2900002H16RIK	91.7997	86.4884	60.241	89.0383	92.8632	87.6934	46.1743	35.8728	35.182
2900006K08RIK	97.3655	98.2156	75.5942	161.494	159.856	127.846	43.5865	48.0268	49.1767
2900009I07RIK	59.9407	52.372	57.4759	64.6328	59.1858	59.604	40.3513	25.8388	29.829
2900010D03RIK	844.052	576.04	416.757	992.618	939.092	831.106	314.145	269.312	219.979
2900010J23RIK	70.0093	67.9614	55.138	143.437	188.055	141.35	51.4271	37.7349	36.8533
2900010M23RIK	1184.23	1050.37	713.347	2855.48	3769.59	3707.72	1132.32	642.049	586.694
2900011O08RIK	81.5117	77.2866	60.7338	103.349	111.692	95.383	40.2041	35.89	35.4103
2900016D05RIK	152.418	140.937	114.812	235.321	242.252	214.662	67.5213	51.3608	59.5741
2900024C23RIK	109.44	102.068	75.2961	95.0568	109.779	105.918	52.6567	42.0561	39.0597
2900024O10RIK	194.921	208.274	134.536	187.519	163.407	145.705	69.6376	58.8475	58.5832
2900026A02RIK	76.745	74.9183	58.9761	73.578	82.5949	78.2932	36.6513	29.986	27.3905
2900026H06RIK	73.0776	65.5149	57.4257	59.7732	58.9026	74.0304	33.1146	24.3986	22.2859
2900041A09RIK	63.2703	69.2144	54.4982	77.4265	80.4811	75.8033	39.5347	30.4846	34.1621
2900042E01RIK	72.107	58.0268	59.5975	66.5792	74.2869	69.0557	37.9786	28.1222	28.3298
2900045N06RIK	218.643	160.791	77.0485	350.609	279.139	250.684	57.7809	61.4925	72.1642
2900046G09RIK	100.733	71.6761	56.3385	97.9901	90.8354	88.0542	36.039	37.6645	35.5692
2900054P12RIK	79.1255	72.9755	57.581	78.5919	78.9636	81.5627	35.9672	30.7267	25.3265
2900055D14RIK	106.453	106.705	92.2253	107.511	126.293	114.025	46.6713	42.5675	40.4449
2900057D21RIK	737.067	772.847	590.523	933.97	940.734	760.64	258.795	261.579	255.83
2900064A13RIK	252.376	221.314	160.205	996.799	1141.59	944.563	199.017	134.674	122.978
2900070E19RIK	956.801	816.165	545.709	1740.64	1963.56	2001.9	729.48	365.873	375.124
2900073G15RIK	125.432	119.793	82.2914	162.664	195.044	146.176	64.1042	46.9425	45.8244
2900073H19RIK	145.325	131.264	93.2682	150.129	145.762	136.981	53.9521	56.5823	56.0654
2900092C05RIK	74.4184	65.8695	66.903	68.3326	58.3081	67.6573	34.2184	25.4589	27.751
2900093B09RIK	70.4214	68.0081	64.8334	63.4334	74.2959	68.9062	35.9058	28.3436	29.2797
3000002G13RIK	79.6633	82.4091	59.6022	86.2467	86.0025	85.4462	33.199	30.3491	28.0753
3000003F02RIK	258.906	230.295	140.019	603.121	634.401	552.814	107.848	100.464	91.306
3000004C01RIK	231.16	255.891	160.052	288.931	428.374	364.408	161.083	116.394	127.015
3000004N20RIK	85.2992	66.665	61.6895	91.555	93.5301	85.6919	37.2466	37.5889	31.3236
3010001K23RIK	84.8349	90.2002	68.4931	180.406	177.874	184.173	48.5539	40.4922	47.2336
3010003L21RIK	79.7586	62.2347	58.4593	77.6278	81.7771	98.6711	41.7356	34.6191	32.888
3010019O03RIK	71.1391	67.3531	65.3143	98.4793	95.4612	95.2805	32.1194	25.4684	24.1027
3010026O09RIK	170.288	156.673	135.336	190.677	216.443	195.734	98.2367	60.1635	67.1539
3010033P07RIK	11505.7	9207.5	5997.62	18133.4	18870.9	18003.4	8063.14	4883.49	4816.61
3100004P22RIK	1201.75	919.797	481.452	1650.25	1583.87	1445.77	636.29	385.68	431.629
3110001A13RIK	684.885	470.481	244.374	644.843	534.978	527.854	145.879	146.103	168.441
3110001D03RIK	2035.86	1833.54	1303.68	2924.9	3245.91	2754.61	1445.46	747.168	848.882
3110001H15RIK	158.043	198.915	100.389	343.679	387.117	351.424	92.6906	71.5096	65.571
3110001I22RIK	76.0351	56.4243	50.042	69.0923	67.4731	68.9871	32.7686	24.8705	30.0544
3110001N18RIK	152.586	114.488	82.1437	704.27	795.81	783.199	136.994	83.5197	87.0989
3110002L15RIK	308.661	311.483	169.547	388.595	370.1	365.012	95.0471	116.042	102.369
3110003A22RIK	73.2263	67.307	63.7533	98.1602	99.6556	101.204	42.2097	34.855	35.5716
3110004H13RIK	165.982	135.25	94.2502	292.391	303.468	266.07	87.4981	61.4984	68.9459
3110004L20RIK	72.945	66.0897	61.5352	68.2383	74.9764	73.2815	35.553	29.3097	27.4792
3110005G23RIK	251.935	201.365	95.1896	546.67	469.377	476.896	159.256	74.6507	81.5823
3110006P09RIK	79.5997	71.1034	68.0301	98.9143	111.485	105.31	36.8632	28.6654	28.2331
3110007F17RIK	100.051	98.7514	85.6117	84.2401	115.473	101.176	56.7476	40.1536	39.1445
3110007P09RIK	65.0038	66.6443	56.7271	75.3655	75.9371	77.4874	37.8426	30.2569	29.8665
3110009E18RIK	753.138	588.233	495.442	753.112	858.209	803.047	300.655	229.704	206.022
3110010F15RIK	87.9612	131.11	80.3156	246.956	182.52	189.654	42.1204	58.4273	79.4852
3110018K12RIK	670.629	572.682	369.18	742.887	780.517	787.847	204.899	249.363	214.427
3110023B02RIK	167.513	159.62	111.695	321.215	274.602	266.259	58.6118	72.5922	68.6889
3110023G01RIK	72.7797	66.3033	54.4074	66.1992	57.709	65.1482	31.9299	24.9794	25.4036
3110024A21RIK	79.1812	69.681	64.5645	175.244	168.2	157.065	54.0788	44.6922	37.0499
3110031B13RIK	150.535	139.425	72.4669	456.684	356.017	349.3	70.343	66.2684	58.8796
3110032G18RIK	73.0727	61.6007	55.7077	71.7242	77.7886	67.5555	35.5529	26.4814	30.1866
3110035E14RIK	69.8291	59.5922	57.0932	70.7405	81.3638	76.5743	37.2353	27.7106	31.983
3110037I16RIK	184.488	193.125	109.782	298.789	302.55	283.176	124.021	89.0178	83.5905
3110040N11RIK	204.404	165.958	122.466	272.619	278.754	298.966	111.669	76.3784	71.325
3110043J09RIK	71.5371	61.134	56.098	77.2609	78.2324	81.3884	35.7692	27.7509	29.392
3110045G13RIK	67.3575	61.654	54.313	63.6385	70.2438	67.4423	32.7831	27.41	28.417
3110048E14RIK	73.7272	65.0686	60.5801	81.3998	80.3679	77.8935	38.5717	30.9983	31.5762
3110049J23RIK	74.1272	69.6397	59.6226	116.349	107.437	110.627	39.328	32.0505	31.1201
3110050K21RIK	112.092	115.453	67.3599	202.974	215.97	194.595	82.9188	58.4087	59.4212
3110050N22RIK	89.5164	70.1129	64.9689	82.8752	78.8538	82.9545	40.3332	26.8675	28.8164
3110052N05RIK	126.935	94.5707	71.1263	133.103	150.03	142.796	59.5037	48.4428	42.0174
3110056O03RIK	364.154	361.066	263.385	763.909	704.948	627.523	122.044	130.442	108.201
3110057O12RIK	177.789	144.807	119.076	228.51	215.885	196.703	55.8563	62.4806	65.9284
3110062M04RIK	81.3434	91.9714	72.3964	94.8711	96.9695	70.1555	33.1424	31.8917	33.2593
3110070M22RIK	74.167	72.1711	60.7122	75.9036	72.2631	76.6479	36.742	26.505	24.7151
3110082I17RIK	108.946	79.1245	68.2526	85.8281	101.251	90.7717	30.7211	27.9284	34.3614
3200001I04RIK	60.9102	60.2583	57.3725	55.1112	65.5423	67.8749	27.7472	22.7434	28.9878
3200002M19RIK	94.0807	108.51	76.612	183.266	196.447	219.786	61.6363	49.3532	47.6406
3222401M22RIK	93.6887	79.0163	65.3809	95.6888	121.24	123.392	38.4823	40.4329	43.199
3230401D17RIK	464.854	340.684	411.859	1070.08	1081.35	970.302	309.512	243.781	225.785
3230401I01RIK	121.004	113.845	96.8303	188.83	205.596	207.164	64.9982	48.1472	48.7518
3300001G02RIK	823.818	796.849	583.181	967.469	1262.71	1249.9	812.31	319.003	352.274
3300001H21RIK	69.8266	68.0403	54.9855	68.0946	68.4959	66.7469	31.4066	25.0135	27.5761
3300001M20RIK	154.288	133.111	89.1413	308.935	343.835	330.481	88.377	59.0584	52.4432
3300001P08RIK	3840.46	4004.38	2569.06	5188.13	4791.02	4292.49	1233.79	1464.67	1266.26
3300002I08RIK	68.2616	51.7633	49.9765	73.5878	70.9908	76.047	32.9641	27.2907	28.8498
3321401G04RIK	62.4301	61.2644	60.4246	71.2307	75.3975	77.5232	37.8496	28.5531	29.0313
3322402L07RIK	61.2681	63.8718	59.6471	62.1244	63.8827	71.3717	32.8839	22.435	27.8428
3526402H21RIK	62.8242	60.4275	64.0744	63.269	59.573	62.8279	35.1663	23.9497	24.187
3632413B07RIK	379.739	370.517	203.68	512.701	495.361	431.569	156.868	125.945	128.125
3632451O06RIK	67.8848	64.0997	62.4131	58.8347	68.3427	63.5774	34.5758	26.8028	26.3335
3732409C05RIK	86.4839	102.881	71.9702	135.885	129.984	128.667	46.2916	38.2256	39.0099
3732413I11RIK	2021.82	1292.51	527.035	3165.96	2991.45	2317.05	820.339	577.078	503.123
3830402I07RIK	87.9769	96.9241	76.245	151.836	158.575	137.184	49.1326	35.4941	33.7831
3830403N18RIK	62.0656	62.0099	53.9928	68.1535	75.1912	75.6325	37.6983	27.0215	26.4413
3830405G04RIK	72.4065	74.8462	60.341	81.7729	79.9644	78.6444	35.187	30.4328	27.501
3830406C13RIK	170.328	166.963	115.377	252.857	264.315	261.352	96.998	64.5222	75.9854
3830408P04RIK	273.08	267.261	165.614	270.73	252.964	287.591	55.9407	75.1425	91.9809
3830417A13RIK	66.8199	60.0151	57.7802	67.2926	68.8269	62.7331	37.6674	31.0145	29.8961
3830421F13RIK	77.0586	66.9384	55.5709	88.6112	96.4816	100.056	39.6833	31.3596	27.7491
3830422K02RIK	59.6047	60.9218	69.856	73.1128	79.2527	71.6369	38.1657	32.1425	28.8801
3830422N12RIK	78.7143	72.1043	64.9651	66.3362	70.8812	72.6856	36.4917	26.7668	28.4994
3930401K13RIK	100.066	83.6695	63.3988	124.568	120.962	124.543	40.496	35.4861	33.0297
3930402F13RIK	180.864	138.724	76.6051	439.024	458.347	381.698	65.9881	79.1856	84.7961
4121402D02RIK	236.663	191.099	111.468	459.063	415.451	389.845	83.4093	79.0169	74.0119
4122402O22RIK	114.383	103.788	57.3724	227.822	311.692	275.178	80.3798	47.5152	62.1741
425O18-1	69.312	65.1917	59.5125	77.9551	84.9818	75.7612	34.3394	24.3881	26.4383
4430402I18RIK	70.6179	69.1727	69.9893	88.3882	80.948	80.8959	31.6427	31.1064	28.1757
4430402O11RIK	302.984	279.869	162.054	346.969	326.717	256.565	66.6715	109.546	108.099
4432405B04RIK	72.4141	58.1709	55.2309	68.086	67.0646	68.0412	35.3742	29.5548	28.0347
4432406C05RIK	310.242	248.875	191.389	309.019	301.102	268.527	107.449	84.2906	90.9354
4432409M07RIK	1128.18	1159.34	608.499	2590.76	1865.42	1947.67	289.129	394.747	419.559
4432412D15RIK	60.1257	42.1655	54.6447	61.3651	61.0453	69.6386	38.2462	25.2963	31.8399
4432416J03RIK	68.3627	60.9531	55.5439	65.9258	68.6046	72.4058	32.1786	24.6853	30.4485
4631401E18RIK	60.8594	67.8444	54.315	67.2232	92.9654	69.0144	29.7508	25.0725	22.7381
4631402N15RIK	74.8634	67.2029	69.2442	73.3809	74.0267	75.9128	34.624	32.5008	28.1632
4631403P03RIK	80.8113	66.1467	63.3246	104.515	107.116	101.054	33.1376	31.4134	31.4556
4631404I11RIK	53.6547	55.6731	51.4565	78.3756	70.9515	83.8974	28.5984	23.3395	27.2511
4631422O05RIK	68.8413	71.0909	55.0603	71.5819	64.0896	60.6691	28.378	24.6192	27.1117
4631423F02RIK	74.5739	64.2033	57.8793	63.8983	75.0135	75.3113	32.8978	26.3802	27.9323
4631426E05RIK	71.9943	68.8754	56.1807	63.7359	70.4153	73.8052	34.0226	27.5692	30.8318
4631426H08RIK	60.545	72.0875	61.5515	77.112	64.7782	74.0036	24.8177	22.6274	24.428
4631426J05RIK	80.2852	89.891	76.9406	110.598	116.951	113.73	55.1491	45.7388	46.0564
4631427C17RIK	108.594	110.379	66.3317	365.633	409.788	347.548	79.4841	39.0924	44.4875
4632404H12RIK	105.825	94.4055	88.0102	125.196	118.63	108.632	37.2695	36.7711	36.1074
4632404H22RIK	186.112	134.295	128.845	175.422	206.24	178.68	80.4502	61.5937	58.8941
4632407F12RIK	78.039	64.8265	52.4671	121.784	116.569	94.7504	31.4816	32.41	28.2121
4632409L19RIK	135.16	97.6475	82.3247	132.376	105.998	115.614	45.8224	45.5455	44.4406
4632409L22RIK	121.168	122.502	85.7656	208.243	205.849	192.203	45.3857	48.6671	49.4166
4632411B12RIK	465.513	389.264	293.053	471.71	466.164	402.989	123.777	145.727	127.224
4632411J06RIK	72.5329	58.0274	61.5815	57.0589	63.0823	54.6169	30.6284	25.8292	21.7703
4632412E09RIK	72.1342	66.0534	62.5779	62.4813	62.6594	68.0429	34.8165	27.5318	28.0983
4632412N22RIK	68.4197	69.8054	60.849	102.191	108.831	100.901	44.3742	31.1433	40.0802
4632413K17RIK	701.028	424.086	243.971	1037.33	949.67	920.215	221.761	249.149	190.659
4632415K11RIK	134.68	92.4286	65.5074	160.755	141.124	142.781	53.4939	47.7135	37.6316
4632417D23	271.758	349.979	316.671	414.918	394.12	367.529	81.5162	112.641	143.549
4632417K02	101.241	77.0242	66.6031	112.546	114.362	105.777	42.3431	28.2361	33.2893
4632417K18RIK	332.473	276.118	279.356	380.051	469.692	536.933	377.142	166.191	249.077
4632417N05RIK	69.064	61.6959	68.8367	92.3495	90.3774	86.8881	29.6763	25.5157	24.9335
4632419I22RIK	78.3361	62.5733	56.5965	65.5862	67.7187	66.7979	36.0517	28.9002	26.097
4632419K20RIK	219.349	209.209	135.072	263.328	167.571	202.579	48.472	75.2538	86.6694
4632422M10RIK	70.5974	61.4042	61.1444	59.5848	60.8778	63.4445	33.0804	24.9607	27.3082
4632423N09RIK	65.5348	74.476	62.5324	72.2063	69.8066	72.3844	32.1059	29.037	26.8071
4632425D07RIK	78.3542	65.1707	65.5375	73.7983	71.2113	69.8759	34.9929	30.7211	26.0318
4632428M11RIK	157.359	156.503	114.519	222.401	210.796	184.413	64.2631	66.9642	54.2665
4632434I11RIK	116.131	91.4811	92.1336	85.4387	87.7498	91.7657	40.5227	38.7061	35.1707
4633402D15RIK	71.0056	63.2875	59.3114	70.4344	72.2235	77.2164	35.5393	25.646	28.0581
4633402N23RIK	80.2242	72.7301	60.5671	100.128	107.497	104.523	47.1394	34.687	34.1594
4732406D01RIK	72.174	74.7971	54.9922	58.5705	65.7727	71.965	32.5903	25.7135	27.5948
4732407F15RIK	68.9976	59.634	59.5621	86.5397	85.1689	86.4306	29.4634	32.1005	24.5264
4732415M23RIK	64.3123	59.5932	59.2145	69.6123	73.6168	79.3992	30.1355	26.9286	24.5773
4732416F18	75.5486	65.1	54.4446	70.748	68.2535	72.7473	35.1065	29.2054	26.3045
4732418C07RIK	295.58	268.9	169.473	370.745	381.834	341.659	111.382	110.488	94.9594
4732429D16RIK	70.7945	61.0689	54.7513	76.0549	98.3212	98.2989	38.8686	34.7454	32.5814
4732429I09RIK	71.9078	59.8769	54.8025	59.9748	64.7654	66.1582	34.4837	26.0338	26.0126
4732433M03	64.4569	56.7199	56.0573	64.1194	62.7353	65.5576	34.8337	28.0192	29.8627
4732435N03RIK	119.462	118.398	75.0686	101.914	107.144	94.1947	43.611	40.183	46.0715
4732437J24RIK	119.901	109.78	76.0955	215.92	190.531	174.582	51.2868	41.745	39.5338
4732454E20RIK	68.2379	67.3638	61.551	68.5776	70.5197	72.2896	29.7827	27.9291	23.6525
4732456N10RIK	61.8171	58.0172	47.4396	75.2213	69.8636	74.3227	37.1594	27.3138	27.6987
4732465J09RIK	99.339	125.191	76.4935	139.336	129.732	114.789	50.8937	41.5228	44.0055
4732467B22	64.2532	69.2569	54.1592	79.0577	82.5616	86.288	34.8488	31.5263	32.9615
4732467L16RIK	59.8455	59.0398	52.2529	61.7639	70.2394	67.3387	30.1933	26.0181	23.6973
4732471D19RIK	170.452	159.662	105.999	242.273	221.475	198.993	60.8048	49.4444	58.5576
4732472I07RIK	73.3575	71.0222	62.8075	70.0678	74.9817	79.0999	37.6704	32.9792	30.7748
4732473B16RIK	71.1685	57.4399	50.2381	80.448	71.3819	73.973	34.4255	25.4598	30.0051
4732474A20RIK	66.7467	65.4406	57.2415	64.6896	71.2094	74.7245	36.8295	28.9256	27.5415
4732475C15RIK	94.0689	85.0737	68.9444	457.135	557.546	390.826	71.6377	73.828	73.9986
4732479N06RIK	150.796	113.342	99.001	188.162	194.98	189.132	69.8835	49.2247	57.2274
4732481H14RIK	104.955	86.932	64.1441	121.359	138.482	126.333	43.3338	37.1022	42.0971
4732484G22RIK	74.1989	53.1668	53.381	66.4258	71.7087	63.3858	31.5185	25.3261	27.8372
4732486J07RIK	53.474	50.5917	52.266	72.6636	98.7998	65.7917	28.2357	23.1995	28.245
4732493F09RIK	1497.69	859.94	564.183	2179.84	2224.5	1581.4	492.493	503.316	507.244
4732495E13RIK	2321.61	1645.85	1123.97	2289.84	2056.21	1711.89	431.405	774.475	539.934
4732495G21RIK	66.9258	59.6939	54.9299	59.1429	56.6267	62.9138	35.0765	26.8178	31.8901
4732496G21RIK	153.557	193.888	110.073	410.793	326.548	318.978	87.7843	95.4284	75.4206
4732496O08RIK	306.116	231.358	193.626	347.931	331.171	294.438	133.955	107.936	102.611
4732496O19RIK	99.6848	78.9061	62.3461	119.511	113.318	109.758	40.402	33.8072	29.3608
4732497O03RIK	217.858	191.6	132.892	296.68	353.83	318.214	107.3	86.6792	82.3988
4733401H18RIK	83.037	97.6213	63.0191	261.329	275.032	252.914	52.0884	48.7677	38.2303
4733401H21RIK	53.5962	52.005	57.8722	54.8447	61.5878	62.504	29.8536	24.9943	30.022
4831417L10	63.3168	53.663	60.6508	67.5961	72.5961	79.3091	35.6877	30.9369	24.712
4831426I19RIK	80.0286	65.3303	59.5627	75.4625	88.2257	80.7824	40.5982	32.2651	35.0797
4831428F09RIK	55.3793	64.1123	55.5339	71.4897	70.5892	65.7365	27.4532	24.9501	27.7769
4832406C22	90.1908	65.3627	60.9805	66.8273	74.1592	74.4548	37.6226	31.1427	31.6664
4832428D23RIK	71.9851	62.046	52.2969	81.3349	98.5656	82.3466	38.0036	32.8865	33.5727
4833401D15RIK	65.8918	57.7203	59.0488	82.3131	73.8737	69.6691	36.3073	25.6157	32.9165
4833405L16RIK	67.8203	64.7032	58.3921	377.012	445.212	394.618	41.4933	28.253	29.3531
4833412E22RIK	66.8976	68.1032	63.1599	62.5817	66.3257	66.6372	31.4149	28.7907	25.0173
4833417A11RIK	73.9058	62.0507	56.8262	70.4659	67.9782	69.8084	31.7506	25.6086	26.1098
4833418A01RIK	430.632	432.955	316.037	451.28	422.569	341.339	104.064	109.36	131.448
4833420G17RIK	1050.05	1365.27	420.852	2786.23	2425.17	2207.67	386.437	588.277	378.688
4833420K19RIK	615.098	868.689	403.974	2501.43	2379.22	2448.75	596.513	382.8	363.927
4833420N02RIK	83.4323	89.3973	64.5455	99.321	116.436	96.5144	51.0922	41.1518	37.1669
4833421E05RIK	232.548	177.543	151.426	234.744	234.492	205.719	86.2959	77.1589	63.1682
4833422F06RIK	218.531	258.987	169.538	325.842	330.571	298.958	94.6309	86.4396	88.4553
4833422F24RIK	71.4659	58.5442	64.6345	82.48	89.4576	91.7883	35.3261	26.5908	28.2118
4833423E24RIK	60.7133	65.6045	54.3642	75.6257	69.9585	63.9942	32.0014	27.6874	27.0135
4833424O15RIK	71.465	69.1372	60.4473	63.4117	64.1012	63.4885	36.281	25.9903	27.4345
4833424P18RIK	213.073	220.145	123.77	388.44	493.051	458.276	114.265	89.3345	91.3024
4833426J09RIK	502.245	423.002	198.131	506.343	540.821	463.873	198.182	139.842	104.875
4833427G06RIK	69.5778	65.251	54.1643	58.1699	64.6618	73.5869	32.6845	27.3379	26.775
4833432M17RIK	70.1011	66.8576	60.3169	84.8965	96.9653	91.4796	51.6772	37.3666	38.7114
4833436C18RIK	95.4276	90.3149	74.7048	95.0332	97.5824	80.6664	38.4725	32.0811	39.1275
4833439L19RIK	329.3	323.154	167.123	679.014	709.862	631.932	181.681	148.133	144.304
4833442J19RIK	89.7655	91.1766	70.2361	128.224	134.902	111.598	60.6574	45.7685	46.2399
4833446K15RIK	71.1139	54.3592	60.5855	74.1936	64.1576	65.9737	32.5385	26.8303	24.9699
4921501E09RIK	72.1929	54.4624	57.5212	101.436	116.064	99.0596	44.5313	36.642	42.519
4921501M20RIK	65.1141	71.6307	52.7833	120.097	98.8817	123.215	37.8848	27.1519	31.7282
4921503C21RIK	58.9336	60.2789	53.1836	67.7029	82.3356	69.7797	40.0211	28.1437	29.9662
4921504E06RIK	69.1451	57.4274	60.7677	69.5756	75.9129	68.8009	34.3257	28.0337	26.4357
4921504I05RIK	59.2451	53.8442	47.6471	63.3397	67.1772	63.6771	30.3253	28.8771	24.4959
4921505C17RIK	744.14	820.692	456.088	943.857	850.524	723.798	186.476	286.508	222.86
4921506I22RIK	638.824	579.716	428.062	917.255	1016.62	779.847	246.508	275.092	261.302
4921506M07RIK	71.3223	71.9336	55.3496	66.1942	78.1837	82.7089	39.2693	26.2064	27.8699
4921507I02RIK	89.0904	84.572	63.8837	95.7557	111.86	96.8363	40.1555	36.3777	23.7425
4921507P07RIK	65.3047	79.0953	54.402	79.0555	82.057	79.0895	33.7067	32.6007	36.2255
4921508O11RIK	59.5215	64.6226	50.4201	85.8133	98.0984	93.3826	39.4062	30.866	30.6546
4921509C19RIK	61.9865	55.9859	58.3756	73.7543	78.2651	75.6988	36.5784	30.5562	29.3827
4921509E07RIK	75.5217	62.9837	65.9909	66.6	62.5179	63.8867	29.8704	27.5083	25.0116
4921510H08RIK	61.3588	77.4684	50.6487	68.8084	93.2744	90.7882	41.454	31.2979	30.9102
4921510J17RIK	59.543	66.6648	52.1933	60.9882	60.6846	63.992	32.3477	28.1177	26.7052
4921511C16	93.9661	78.8293	69.6829	114.122	136.494	125.622	54.2797	33.0789	39.5691
4921511C20RIK	60.2017	57.9966	50.6409	68.6123	67.8113	68.6857	36.986	26.3386	25.5977
4921511F01RIK	68.4617	68.0534	58.3341	72.7285	67.6331	72.6131	39.0365	30.281	29.6097
4921511H03RIK	65.8428	60.9466	52.7002	66.1402	67.5676	68.6983	36.0503	30.2216	29.0502
4921511I16RIK	92.9165	76.3265	80.0942	119.808	130.474	123.654	55.7757	64.5622	49.1919
4921513B05RIK	70.6557	61.8295	67.5857	70.9655	72.8106	79.9694	38.2017	28.4414	28.8132
4921513O04	67.3686	67.3069	62.4146	64.0093	69.2145	62.4982	30.76	27.4272	30.8465
4921515J06RIK	62.1571	54.8139	52.065	68.4079	74.1225	70.9503	35.4206	27.8557	31.0303
4921516M08RIK	59.5211	50.0201	56.4144	65.3165	57.7786	60.2935	32.8884	29.3841	26.4975
4921517D21RIK	61.5126	53.2461	53.6057	57.2407	63.6405	68.0686	39.2261	27.2179	25.6882
4921517D22RIK	51.7762	58.2853	49.2859	60.3988	73.7185	68.1333	35.0658	26.0759	30.6174
4921520G13RIK	66.8729	60.9327	60.4614	88.7698	107.382	91.4322	41.1127	36.0611	32.5321
4921520P21RIK	71.2055	68.8918	57.7247	69.2429	69.046	69.1696	34.6628	27.1882	26.3875
4921521F21RIK	67.8459	63.1245	59.0831	60.9154	67.0855	65.5784	31.4175	24.4497	24.4067
4921521N14RIK	76.5197	58.1623	54.541	56.8259	62.9962	64.8766	35.4773	27.4585	24.4743
4921522K05RIK	66.3669	71.9338	61.0624	63.301	65.7398	64.1267	34.1326	30.4846	28.776
4921523A10RIK	67.0959	61.1034	55.7455	69.0103	72.723	72.3473	33.7849	30.0814	28.2731
4921524J17RIK	54.1008	53.2441	55.7885	56.2505	67.2203	62.0378	30.0587	26.1369	22.2022
4921524P20RIK	284.803	199.675	146.718	330.508	353.567	268.335	138.038	110.78	114.077
4921525D22RIK	69.7387	64.7525	58.0413	72.8546	82.6552	72.8165	34.2838	29.8044	30.7823
4921525H12	69.1981	68.0367	62.5622	84.5519	82.8694	82.7629	39.4979	27.0792	27.8329
4921528G01RIK	200.164	191.238	87.9007	568.98	560.69	463.529	86.4408	92.2698	89.6644
4921528I01RIK	73.1096	66.9681	54.8247	69.3953	63.98	63.7735	36.3188	29.0058	26.6426
4921529O18RIK	86.622	77.477	60.0782	64.4742	63.4	72.4811	31.2914	31.1938	26.7053
4921530G04RIK	58.2293	44.8653	46.7907	54.3408	65.1497	59.0863	35.2498	25.5051	26.4002
4921530L21RIK	67.8401	56.3758	53.439	65.1159	78.189	81.0977	38.8644	29.6992	28.4302
4921532K09RIK	72.8628	70.4485	53.8334	108.268	102.387	115.562	38.1551	35.3746	26.9019
4921533L14RIK	61.9827	54.6472	53.1183	62.6856	61.4824	57.7191	30.6792	30.2649	23.8697
4921536K21RIK	72.2206	69.4646	58.2483	83.9219	91.1665	79.492	43.8151	31.0158	27.6929
4921537D05RIK	521.747	559.555	417.125	604.158	735.006	604.583	267.248	240.986	216.004
4921537P18RIK	62.174	59.96	53.6364	62.1823	62.8138	61.9873	35.0081	25.0066	25.6542
4922502D21RIK	65.5165	68.545	62.5844	69.6218	76.2157	61.7446	30.9832	30.0181	26.9427
4922503E23RIK	56.4143	70.4332	53.4963	79.9334	70.6425	64.2184	34.2548	24.2921	27.6432
4922503N01RIK	60.7021	70.0183	58.6426	68.4166	74.8352	68.7565	35.4509	28.0407	30.0638
4922504H04RIK	72.9967	62.6014	60.2743	64.261	70.2385	71.5414	35.1425	25.4591	31.9113
4922504M18RIK	63.6617	60.7692	55.7569	79.3425	75.8102	81.3197	33.0522	30.4669	25.538
4922505E12RIK	64.2534	59.7451	58.8037	69.582	83.5066	70.4913	31.4958	26.2761	32.6795
4922505G16RIK	70.7779	69.7483	60.3184	83.517	84.7561	86.8876	34.9488	29.0333	29.0528
4930401F20RIK	73.143	66.3299	57.7113	67.3412	79.4345	69.722	38.212	28.2912	29.1175
4930402E16RIK	67.9603	65.3819	66.4277	78.7109	80.3538	60.2272	28.4209	35.2892	23.77
4930402H24RIK	84.6176	102.579	68.6979	159.138	150.403	141.731	38.6712	34.9569	32.1355
4930403C10RIK	90.5389	133.832	92.8592	180.857	219.927	173.84	56.8598	48.5225	48.1693
4930403J22RIK	80.8312	83.4086	58.4317	153.596	150.133	181.462	46.0358	39.6634	33.874
4930403L05RIK	70.7255	65.5291	61.7562	70.8269	73.9606	67.5485	31.3056	25.2636	27.4095
4930403O06RIK	684.979	559.092	433.395	694.624	951.916	750.231	302.298	196.55	189.936
4930404H21RIK	71.6518	66.442	56.2639	68.8066	66.8277	65.8865	41.5195	28.2034	32.593
4930404N11RIK	66.5134	58.8649	52.2991	73.9872	79.7698	68.6501	34.5708	28.8771	33.9271
4930405J24RIK	61.4602	59.6032	52.1636	55.7182	69.9652	57.2712	31.1154	24.6364	27.0555
4930408O21RIK	70.6646	60.751	65.8675	72.0946	74.6255	69.6913	31.6843	28.1943	30.1553
4930412F15RIK	56.2823	56.1565	53.1746	62.0122	67.7349	64.5368	29.5705	28.6288	27.0181
4930415G15RIK	64.293	65.8141	57.0048	70.6024	76.7063	78.3129	28.1128	25.0163	26.8942
4930415J21RIK	126.868	117.05	85.2709	157.134	157.457	133.893	59.0055	48.6268	49.7441
4930415L06RIK	60.7975	60.3754	54.8187	117.346	105.679	119.782	36.5511	32.2887	31.6811
4930417M19RIK	53.9919	56.0743	55.312	62.2261	65.0005	60.9746	36.3438	24.0988	27.4549
4930418G15RIK	70.3935	71.7041	58.5303	69.8444	77.8584	71.2023	34.1905	25.8497	26.0836
4930418P06RIK	262.061	167.237	108.763	157.572	172.551	171.972	81.9792	57.5363	65.0371
4930422J18RIK	231.22	162.349	96.5572	192.56	198.862	201.439	53.0463	80.7206	76.9674
4930424G05RIK	71.2359	62.9338	54.8574	187.91	209.182	168.869	37.1949	31.6454	28.0197
4930425N13RIK	81.1958	72.1073	62.8861	65.4273	71.2787	68.5225	31.993	25.6107	28.6348
4930427A07RIK	92.0339	91.4211	76.2674	126.751	164.244	154.115	41.114	36.8146	39.7685
4930428D18RIK	69.9498	75.296	60.4437	72.6192	70.7936	71.5596	34.331	25.139	27.6746
4930428E23RIK	55.5518	58.0275	55.0347	61.842	66.2261	62.3765	29.8586	28.7905	30.5125
4930429A08RIK	139.559	149.527	104.471	245.535	241.722	235.763	64.8197	64.5802	65.1573
4930429A22RIK	279.015	215.178	140.593	273.536	287.161	250.899	111.681	79.2831	75.076
4930429M06RIK	70.3438	72.0311	54.5858	68.662	73.8889	71.7161	41.7282	27.1474	27.4746
4930430A15RIK	56.8367	66.6828	53.7847	61.6192	63.2492	71.5893	35.0144	27.1591	23.493
4930430D24RIK	71.6731	72.8849	57.049	65.2233	67.1962	67.3879	30.8216	24.9177	28.1724
4930430E16RIK	70.9763	58.8747	56.8389	82.7007	81.7561	75.2649	35.3462	30.7201	30.1113
4930431B11RIK	126.5	124.36	93.7156	114.529	121.72	102.012	42.6145	45.562	46.3145
4930432B04RIK	623.196	701.519	420.827	643.576	876.717	746.1	418.085	273.867	276.942
4930432H15RIK	67.3932	66.6739	66.823	64.7219	68.4266	68.5835	28.7872	26.751	27.2522
4930432J16RIK	70.3428	72.5211	53.6101	59.0644	69.2887	73.5671	29.9739	31.3256	28.8046
4930432K09RIK	57.3042	63.3586	56.7589	59.7346	62.0057	63.6831	38.2501	28.5508	28.2247
4930432K21RIK	85.7431	78.8377	67.2434	83.0995	95.1288	89.9387	38.7064	25.5482	29.1848
4930432M17RIK	82.2992	63.6594	57.3846	64.1744	73.8806	76.698	37.45	30.2008	29.2674
4930432O21RIK	644.239	681.165	372.599	639.983	540.317	500.275	182.022	142.659	149.944
4930433I11RIK	65.4147	58.8684	54.1001	72.7932	68.7751	64.4244	34.428	25.7126	27.0719
4930434E21RIK	64.1081	59.6973	52.8991	69.6098	79.2634	67.3719	34.1726	23.7374	27.4248
4930438M06RIK	74.809	72.1432	56.5726	85.5012	76.0147	87.8665	42.8635	28.6182	27.7463
4930438O03RIK	92.1379	75.9811	68.4654	78.4148	81.6464	81.1141	30.9381	26.5596	31.5107
4930438O05RIK	102.732	80.9903	61.9973	103.934	100.447	96.5923	36.2798	35.3578	33.8027
4930442L21RIK	54.0577	51.7823	46.8992	57.6584	53.4819	56.824	31.048	29.021	27.6414
4930444A02RIK	71.8377	64.7448	49.8514	106.427	101.184	110.08	34.7417	34.3208	30.0272
4930447C04RIK	59.3385	68.473	60.0972	65.0777	73.0388	67.8715	34.1306	32.1206	34.1534
4930449E07RIK	117.674	107.005	81.4274	120.587	107.709	109.818	42.8427	39.9585	42.1058
4930449I24RIK	67.3817	52.0445	55.7275	65.2427	68.6748	65.7156	36.8853	26.0471	35.0455
4930451C15RIK	55.76	67.4852	54.2482	90.1419	84.2416	87.4331	36.9172	28.3268	31.5663
4930451F05RIK	66.7385	60.5636	51.9976	54.455	62.418	56.6275	34.9148	27.5811	27.3002
4930451I11RIK	67.5245	71.5298	63.0078	79.6666	81.6954	84.6974	35.384	30.8307	31.0791
4930452B06RIK	98.2383	86.3989	71.7067	70.6226	72.0828	73.4532	40.1856	39.3366	38.0531
4930453N24RIK	874.971	719.448	669.738	1345.88	1419.63	1319.66	484.925	395.822	341.757
4930455C21RIK	171.886	141.191	116.829	281.039	295.99	311.43	107.947	99.3824	152.567
4930455F23RIK	363.932	358.195	248.627	400.49	420.901	375.605	162.734	124.378	137.107
4930465K10RIK	81.0659	84.2689	59.6087	82.1625	79.1045	80.5641	41.5166	30.6328	32.0997
4930466G16RIK	62.6417	65.1161	50.5958	68.6001	66.4428	71.7591	31.9608	28.174	27.7767
4930467B06RIK	85.3574	76.5736	68.0618	120.323	109.281	108.215	48.9458	36.6431	36.3447
4930467M19RIK	71.3085	62.4378	53.2668	91.4877	93.9397	102.899	43.4315	29.2864	36.3562
4930470D19RIK	119.839	166.284	66.3357	449.064	396.754	380.315	67.9622	76.8477	57.6183
4930470P17RIK	73.1363	76.5522	65.9671	70.0673	81.3055	75.3037	35.5482	29.7223	25.5018
4930471M23RIK	76.3335	62.8482	55.6342	80.5084	100.947	84.1782	37.5868	31.183	29.3134
4930471O16RIK	233.922	233.982	123.852	169.797	206.943	186.513	151.678	113.18	98.0484
4930474N05	69.8897	68.1377	53.8176	76.1928	88.5457	83.8189	42.5694	33.4932	30.7047
4930478A21RIK	84.6435	80.6654	55.6628	97.1014	90.7361	87.7617	33.8891	29.5617	29.0218
4930481F22RIK	85.5377	78.7654	67.1386	87.4178	85.3976	80.3553	35.5969	28.2409	27.3949
4930481M05	68.1946	56.1562	55.6904	80.6525	70.5392	76.254	36.935	27.3689	29.7035
4930485D02RIK	232.914	199.201	92.7783	554.062	547.615	528.409	131.433	79.8378	96.3221
4930486G11RIK	66.813	63.4849	63.6252	91.028	78.0288	76.1814	33.8139	30.4195	27.2764
4930486L24RIK	187.606	187.434	125.855	368.51	400.808	391.255	137.469	83.683	67.928
4930488L10RIK	66.8459	57.6713	53.6452	79.4112	84.2194	83.3974	34.0283	27.1345	25.7933
4930488P06RIK	745.048	729.458	292.714	917.074	905.99	761.187	276.161	234.05	212.534
4930500E24RIK	84.6334	69.1858	63.8627	71.8286	68.8304	77.9011	34.4846	28.3358	26.7066
4930502E18RIK	59.9141	54.8506	54.6559	63.83	68.5064	60.9797	36.0417	27.3895	32.4948
4930503B16RIK	57.5591	51.973	56.4326	67.3717	62.6418	61.4981	35.6964	25.3711	26.298
4930503B20RIK	78.5445	62.5348	57.8485	74.6368	86.2219	75.9262	42.0778	30.6231	36.2153
4930503E14RIK	67.4526	60.7838	57.7348	70.1716	67.0793	69.7873	35.6833	26.4337	28.4051
4930503L19RIK	82.371	112.696	65.0926	159.374	179.76	148.957	42.61	43.1021	59.7295
4930504E06RIK	332.412	270.807	174.809	470.807	378.669	360.224	104.09	99.8313	109.095
4930504O13RIK	54.2756	53.9813	46.8885	57.9659	56.9161	56.7506	37.1518	27.8235	28.4265
4930506C02RIK	123.131	92.2879	82.1487	113.495	112.599	107.421	41.1322	41.0284	32.4393
4930506D23RIK	111.975	134.3	84.4276	133.263	136.39	122.858	60.0502	38.8559	43.9584
4930506L13RIK	58.3063	70.2148	49.4653	72.077	68.3667	75.918	40.3379	28.461	28.1366
4930506M07RIK	77.1734	50.5015	60.9773	115.49	105.31	92.1283	30.8995	28.1206	22.9211
4930507C10RIK	102.132	91.7763	78.9135	108.814	101.112	105.408	39.0187	37.085	36.4028
4930509O22	80.1757	70.2467	58.9975	93.9343	98.2412	90.9035	43.8275	35.2319	33.6246
4930511H11RIK	77.148	60.461	58.6302	64.0104	64.7758	63.9319	33.1609	28.1275	28.6188
4930511I11RIK	63.9855	65.5731	54.0587	72.0833	75.187	73.5367	33.6153	27.1044	30.7433
4930511J11RIK	70.7425	74.6996	55.9005	105.235	106.168	96.1148	44.746	30.6109	29.7018
4930511M11RIK	66.3807	60.8672	48.8944	65.8985	66.0125	63.5816	37.0298	24.8158	32.0198
4930511O11RIK	77.2661	57.7196	62.6506	67.6638	66.4422	67.0242	36.6419	26.0613	24.6164
4930515G01RIK	75.3746	88.349	66.749	194.552	169.246	183.263	60.088	32.5706	39.0785
4930517G15RIK	64.3636	73.3955	58.2509	72.5326	62.5428	71.6044	29.6562	24.5255	27.1615
4930517K11RIK	67.5455	62.8715	58.1102	67.8054	72.7148	72.7426	28.4734	30.3327	27.0448
4930517K23RIK	71.3405	62.5111	55.6524	86.2637	82.3417	81.5149	38.113	27.7514	31.5399
4930518C23RIK	62.6338	68.2806	57.901	108.36	81.0141	88.4573	44.3447	31.7991	31.0554
4930518F03RIK	51.6636	57.4863	50.1958	59.371	71.5041	75.6305	34.4396	27.0526	27.2653
4930519F16RIK	61.478	54.6357	52.8522	77.7202	68.7165	71.1536	34.8686	27.4811	28.2135
4930519G04RIK	58.6268	74.2841	63.4691	65.9265	72.0882	72.6051	37.5758	28.9447	28.8746
4930519N13RIK	65.2764	59.0463	46.0398	81.0126	80.0537	76.3324	31.4561	23.6239	28.6863
4930519N16RIK	51.5175	59.3006	52.5347	57.0819	71.7982	68.1251	33.9521	33.8896	28.8043
4930521A18RIK	72.5778	71.6736	56.751	64.2517	77.3242	75.1233	34.3841	27.3761	28.5554
4930521E07RIK	88.674	77.9272	67.0224	128.224	133.744	124.618	45.3273	32.5866	36.1375
4930522D07RIK	59.0592	61.0505	51.5222	64.8439	60.5132	67.6236	38.8779	29.4331	25.8018
4930522H14RIK	68.4476	57.0433	61.1782	77.7878	70.8492	74.1142	32.5292	25.8608	26.8529
4930524B15RIK	65.0795	58.38	58.6576	64.5804	67.0228	66.8781	37.5475	25.8293	29.392
4930524E20RIK	86.165	85.4731	80.5449	77.4102	78.4681	75.4627	38.0943	31.3663	30.7353
4930525K10RIK	60.1908	52.6178	53.7107	68.6101	66.0732	68.5007	35.496	28.1676	29.6062
4930526D03RIK	68.9492	66.5688	57.2932	63.2528	70.5951	68.2772	34.7965	25.8109	24.6432
4930527D15RIK	762.785	499.536	351.051	720.477	707.873	701.733	193.484	174.265	193.216
4930529M08RIK	56.2431	70.5169	59.3607	75.8898	76.1475	73.6551	32.522	28.3322	29.8083
4930532D21RIK	75.8749	67.2151	67.9601	75.3975	68.1416	72.0005	39.1599	30.5533	31.4692
4930535B03RIK	103.091	84.5062	67.7493	122.471	110.168	117.087	37.9111	37.5307	35.2493
4930535E21RIK	74.174	68.904	55.2245	99.8979	92.2985	87.5389	42.86	26.7949	27.2673
4930538D17RIK	83.4003	89.6974	59.5447	79.0178	71.8819	69.8095	34.8528	33.6966	33.6362
4930538K18RIK	60.3017	56.6841	58.5223	63.3201	68.0267	67.2827	29.1811	25.1356	25.6424
4930539E08RIK	131.446	106.632	85.914	71.4043	67.2877	107.256	32.0098	44.5461	39.2659
4930540L03RIK	76.0436	76.3415	70.7586	95.3697	98.2375	85.8843	31.5267	27.8834	27.9676
4930542G03RIK	1282.01	1075.42	716.071	4120.3	4762.24	3802.07	1681.03	798.682	986.659
4930542N07RIK	60.8565	62.1472	52.771	58.3584	62.0911	61.6103	33.0534	25.1032	26.7648
4930544G11RIK	118.751	112.201	104.345	83.9569	79.1034	80.3735	34.1058	36.9767	31.7851
4930544G21RIK	79.2169	87.633	63.4033	79.8208	85.324	81.7412	38.9695	30.5822	31.7549
4930547C10RIK	72.2248	65.7375	58.518	108.062	124.677	110.634	32.6009	30.8287	29.6935
4930547N16RIK	144.322	191.811	122.983	178.182	276.374	217.778	87.1258	66.7855	75.4411
4930548G07RIK	70.9388	69.2895	51.2231	68.1005	71.6195	69.6667	33.9252	28.017	28.6902
4930548H24RIK	57.7648	63.3546	66.6104	85.0226	89.6757	86.076	31.7134	27.4343	27.4622
4930549C01RIK	62.0396	63.8635	56.4511	75.395	79.8977	70.7255	30.1789	28.6511	24.4092
4930549O06	61.5073	70.8917	52.7527	64.9795	58.3688	66.007	31.924	26.3492	25.1512
4930550B20RIK	97.691	93.9042	71.5673	126.58	115.931	107.696	43.1957	35.4468	39.3039
4930550C14RIK	110.098	78.3376	79.809	128.206	124.109	153.957	60.7578	28.2734	33.8131
4930550L21RIK	78.1505	68.5196	61.977	80.5499	81.22	71.9161	37.3434	28.482	29.1707
4930550L24RIK	60.6272	60.3793	53.2522	67.4879	76.452	77.1959	31.0501	28.9693	28.4634
4930555G01RIK	60.3238	59.397	54.4238	71.0822	72.5338	73.8376	37.4296	32.8087	28.3226
4930555I21RIK	64.7292	59.5976	55.9872	63.5774	62.6545	67.5561	44.6077	29.4222	30.7644
4930556P03RIK	171.857	134.78	79.3438	231.691	225.682	212.668	78.1764	56.9035	67.3174
4930558O21RIK	73.4214	77.9165	70.6663	70.1805	72.7363	67.8967	32.7737	25.7338	25.8561
4930562C03RIK	294.871	253.698	207.455	569.858	542.327	478.733	95.7807	121.609	94.1441
4930562D19RIK	69.5366	65.5726	61.513	69.1825	80.8929	72.7411	34.8734	30.373	28.5902
4930563A03RIK	72.3503	76.0519	60.5599	71.2189	74.5977	65.8609	31.4376	26.5261	27.287
4930563D23RIK	73.7324	67.4567	58.9523	71.0138	71.963	69.0428	33.0313	26.6993	24.6579
4930563E19RIK	58.8115	64.2901	64.0231	58.4668	73.6509	67.4261	31.7107	29.9056	30.7031
4930563M21RIK	58.883	53.4949	51.2905	73.1066	70.4836	52.086	32.1559	27.5495	27.65
4930563P21RIK	64.0227	71.4391	55.8713	66.948	68.8301	68.0826	29.8808	30.1402	29.2332
4930564N15RIK	68.278	51.9785	44.8317	57.5832	60.1418	62.955	28.2796	27.5337	28.9656
4930569K13RIK	61.6355	60.0734	54.0648	87.1278	91.7858	77.1178	45.2357	31.423	35.0536
4930570C03RIK	234.995	163.179	95.1106	297.898	296.344	282.137	62.6039	84.4527	71.7149
4930572I07RIK	73.9021	64.4617	59.95	76.8914	77.2369	80.0922	34.4474	27.6192	28.238
4930572J05RIK	917.43	957.311	405.961	1935.43	2388.7	2040.29	465.808	284.591	316.4
4930572L20RIK	71.5231	67.1902	58.1131	76.5991	76.1498	68.9813	34.2382	34.2722	31.7344
4930573I19RIK	108.796	107.76	74.1311	182.237	170.868	143.247	40.1568	41.237	45.3903
4930578C19RIK	68.852	65.7204	48.7083	99.3849	101.937	91.2051	32.3114	22.3856	31.0269
4930578F03RIK	163.372	183.569	116.868	216.898	266.661	236.111	64.3245	69.666	55.2569
4930578I06RIK	78.4503	61.7602	54.9131	92.4189	89.2131	82.2428	42.5809	33.3481	28.875
4930579C12RIK	65.231	68.0032	55.2824	77.3041	82.6304	76.1457	37.7034	25.7628	32.5661
4930579C15RIK	49.4624	49.93	44.4842	62.7544	55.9614	57.5697	27.3892	26.2279	31.064
4930579E17RIK	67.5718	60.6587	59.0996	71.8628	70.4255	75.7235	34.2368	26.4642	27.4303
4930579G22RIK	62.6079	60.0633	55.7569	59.1536	60.8242	59.673	27.1666	24.9365	26.359
4930579J09RIK	67.0795	56.1174	53.5838	82.1662	83.8019	82.2763	36.5598	34.6439	37.5714
4930580F03RIK	66.2118	59.3073	61.8853	66.665	73.9963	72.113	32.3137	25.0073	26.7856
4930583C14RIK	75.8403	71.7092	54.8388	62.8638	64.405	68.8797	30.3319	26.5489	27.5152
4930583H14RIK	63.685	73.6407	70.7092	88.7233	88.3725	92.7049	36.3537	30.2074	32.5577
4930588M11RIK	46.1762	47.319	44.7436	52.9416	53.0841	57.2974	31.1486	27.9898	27.5526
4930590J08RIK	61.4347	70.2104	68.8827	65.1727	65.6902	70.3136	32.8062	26.328	30.6804
4930594M22RIK	70.9387	61.8176	57.1472	70.8574	83.6307	71.8958	35.0342	26.0305	25.3658
4930595M18RIK	70.3546	69.9977	59.215	62.7469	64.5794	77.726	36.3088	27.2353	25.6813
4930596D02RIK	60.5796	68.029	55.0742	65.7182	65.3282	60.9572	30.2405	34.1486	27.1761
4930599N23RIK	67.0254	66.8206	57.0565	66.6587	69.1127	67.3521	37.5211	30.3976	31.9467
4931400A14RIK	274.223	235.106	207.536	359.561	388.517	350.702	144.419	95.6569	99.454
4931403F16RIK	61.505	60.958	52.33	60.5156	61.9705	62.0861	32.3245	26.6068	28.8936
4931406B18RIK	58.5525	70.1524	55.8413	62.3098	67.0368	63.5228	33.2517	25.2172	29.2085
4931406C07RIK	107.426	109.784	70.1257	130.812	135.938	123.275	53.9512	47.2206	48.1978
4931406H21RIK	74.3615	74.3989	68.5427	72.6279	74.4325	78.9971	34.3372	31.2343	29.7611
4931406I20RIK	81.1698	71.0091	60.724	139.928	136.983	133.816	44.7507	38.1024	39.4192
4931406P16RIK	575.347	535.069	404.287	543.241	572.497	508.227	155.591	175.222	141.989
4931407G18RIK	57.3468	47.318	50.2977	51.3572	56.6754	58.4187	30.0098	27.3171	26.9999
4931407K02RIK	67.8817	69.8218	59.548	73.6174	75.1691	72.0221	35.1661	30.167	27.047
4931408A02RIK	68.0904	64.5161	54.5031	64.2566	69.7745	69.4104	37.4879	26.017	30.4074
4931408C20RIK	69.5013	65.2315	56.5833	59.7731	67.4416	67.4143	34.926	25.8834	26.8367
4931408L03RIK	112.888	92.1547	96.1949	421.264	336.718	305.582	79.4023	76.3445	59.3523
4931409K22RIK	72.5379	68.9752	56.3836	64.1985	70.4292	72.7938	32.6103	28.039	27.7228
4931414L13RIK	76.0894	68.7339	58.5143	104.838	105.034	92.9094	49.9165	30.8402	35.9633
4931414P19RIK	55.6013	70.0719	49.9285	72.943	61.1382	61.7988	30.1684	28.2346	28.8277
4931415M17	57.6032	58.4377	55.059	59.9827	74.0184	75.4654	29.077	25.0813	25.7044
4931417E11RIK	79.4561	77.878	60.102	69.1397	68.5846	64.5444	34.1903	27.1391	30.5172
4931417G12RIK	67.6403	64.614	54.1547	59.1454	72.7698	71.5198	33.5299	24.8756	28.5134
4931419P11RIK	88.3698	81.9365	62.9654	77.7321	82.5144	89.6458	41.9404	32.2578	31.755
4931427F14RIK	65.9539	58.8616	56.1226	67.2123	68.1577	66.621	33.7833	28.0696	36.057
4931428D14RIK	66.9007	67.371	55.9986	63.8054	74.3919	64.6937	33.6295	31.7526	25.8477
4931428L18RIK	76.7008	75.5419	58.9801	81.9293	87.0342	88.2315	39.9465	28.6462	29.3375
4931431L11RIK	485.33	373.686	275.362	583.281	520.056	572.934	148.109	124.9	144.294
4931432M23RIK	95.3023	66.9039	65.9516	85.8293	73.0327	73.0432	34.2677	24.2885	28.2566
4931433A01RIK	64.2598	58.0231	50.6568	61.2171	64.2254	61.3733	36.3692	27.4953	25.7506
4931433A13RIK	62.8586	63.9462	57.3568	67.0682	69.0664	63.3348	34.8933	28.098	27.5323
4931440B09RIK	69.9175	64.2605	60.0045	63.8671	65.4142	69.2658	33.0185	22.7003	27.3711
4931440F15RIK	70.9975	63.9333	59.7693	83.8898	75.29	84.9424	37.746	26.9212	28.936
4931440L10RIK	71.619	66.8199	61.8595	94.9423	100.037	85.5423	34.8577	31.8652	31.9573
4931440N07RIK	113.548	86.1133	82.2669	101.366	107.421	97.5832	50.081	48.505	41.1342
4932408F19RIK	109.641	91.6573	65.6197	185.944	178.052	168.417	63.0071	52.4727	57.8157
4932409F11RIK	585.298	515.827	290.185	1510.28	1547.65	1460.46	249.098	263.808	266.741
4932409I22RIK	64.2382	60.4058	59.6165	72.2654	73.2862	72.5329	31.3817	25.1503	29.3749
4932411E22RIK	70.8645	70.4907	65.3953	73.9622	74.8949	76.9313	41.9824	28.9109	25.6317
4932411G14RIK	62.7746	68.0249	57.2293	58.9838	66.4528	73.5035	37.3165	24.3738	27.8456
4932411N23RIK	56.2568	57.5794	51.7295	56.3497	55.927	54.9898	35.2164	28.1144	32.4433
4932412H11RIK	77.4059	74.8741	66.0024	90.7332	100.249	95.3224	38.213	33.5633	31.0768
4932413O14RIK	62.2486	53.361	52.0701	77.2012	76.6354	79.0773	28.3244	21.8138	27.9638
4932414J04	71.7232	69.2197	65.1659	73.7288	70.5289	69.6974	31.8131	29.5399	29.4239
4932414K18RIK	9040.9	6455.17	3794.08	11178.9	11018.3	8903.73	3212.94	3116.63	3104.46
4932414N04RIK	59.0156	66.9627	55.5349	60.5645	71.2404	66.5796	36.7173	28.0884	26.2267
4932415G16RIK	67.7489	54.9364	56.0076	61.0363	57.0797	66.1079	33.5109	23.6921	22.0176
4932415M13	60.9208	58.9909	54.7151	61.9781	64.8466	61.3518	32.5805	25.8167	26.3761
4932416A11RIK	72.5732	67.0148	55.3077	67.2675	75.0899	70.2236	35.2881	25.4706	26.0488
4932416A15	70.2334	65.7543	56.5722	77.3946	92.3818	77.7385	36.151	27.0761	33.2017
4932416N17RIK	87.5374	74.1006	62.9714	96.4167	92.2383	93.6995	37.6482	27.0535	29.0992
4932417H02RIK	61.3542	53.6712	49.8691	72.6959	61.6581	57.9535	28.5719	27.708	24.0113
4932418E24RIK	70.5702	66.91	54.5765	71.1146	74.8873	68.7744	33.1183	26.772	32.1849
4932418K24RIK	53.1761	50.5507	45.3524	57.4328	73.0917	68.5529	40.6031	29.4251	30.731
4932430I15RIK	69.1506	77.4662	63.5976	68.1512	66.9236	80.1999	37.1659	25.8737	28.5174
4932431H17RIK	68.3956	62.4869	57.1744	80.6173	77.7463	84.5305	36.8263	30.9941	28.7998
4932432K03RIK	55.4101	52.2756	51.9712	55.0252	66.3231	61.8204	32.001	26.1948	23.5603
4932432N11RIK	66.7163	65.8219	49.2925	98.6067	101.445	99.3064	38.182	39.034	35.6531
4932438H23RIK	74.401	67.0183	63.3525	76.0115	77.3764	78.7538	35.8993	30.0479	28.493
4932439K10RIK	1936.79	1497.42	905.762	1531.05	1416.91	1216.96	575.133	415.156	459.604
4932441K18	83.2574	80.9998	70.1194	72.7549	76.555	80.943	35.6868	27.6072	28.9346
4932441K18RIK	757.697	772.844	310.416	1377.16	1268.83	1083.35	179.945	210.227	211.717
4932442K08RIK	128.97	119.11	76.7367	205.456	221.154	197.126	60.0565	55.6446	50.1718
4932442K20RIK	425.776	466.878	169.794	723.659	753.509	583.292	146.315	135.335	130.92
4932701A20RIK	65.0596	63.7192	51.7338	61.7576	64.0026	63.8212	30.7041	29.0215	28.3857
4932702K14RIK	64.2646	71.4295	56.0983	100.428	106.464	117.533	37.4811	28.0312	32.4778
4933400A11RIK	70.6062	54.605	64.7613	54.0157	66.4031	65.2121	30.5072	25.5422	24.0628
4933400C05RIK	62.1991	50.9161	55.9674	53.6005	60.0743	50.5897	29.0894	27.2096	24.1927
4933400E14RIK	66.3439	79.5772	61.7629	109.887	99.8906	92.7281	34.5276	25.1307	25.1352
4933400F01RIK	85.5627	68.1521	56.0616	83.0881	85.3704	92.9432	41.3126	31.0846	41.6128
4933400K24RIK	72.86	72.7156	65.2135	71.648	75.3162	78.8445	34.8761	29.9712	29.4073
4933401I19RIK	65.0591	59.0821	53.3079	66.5996	76.8261	68.7141	35.7231	28.6337	25.8637
4933401K09RIK	62.9492	51.3747	53.3576	75.3724	68.9914	64.5811	34.4955	28.4953	32.6185
4933401N24RIK	43.9494	51.1974	42.4527	82.7455	94.3574	74.7067	31.8882	28.8674	30.2115
4933402B14RIK	76.3996	72.0218	54.0954	97.8275	107.696	100.279	39.1311	31.2975	29.6646
4933402J07RIK	72.3637	60.2506	65.5841	79.4623	88.3417	79.1689	33.8618	24.285	29.4789
4933402J24RIK	69.081	63.6388	52.6907	73.8304	67.0778	69.9106	31.9057	25.5095	26.7635
4933402N03RIK	62.5928	53.7092	50.0805	52.9973	51.395	59.2345	31.0257	24.6967	31.497
4933402P03RIK	67.9436	52.5271	53.8221	69.5904	71.0631	70.4913	35.3131	28.1162	26.4628
4933403F05RIK	70.0062	67.7948	62.4555	74.8225	76.1283	66.8355	32.4735	24.3713	28.93
4933403G14RIK	127.836	143.442	80.5394	85.0928	92.4652	81.1921	42.764	38.9128	33.3081
4933403H06RIK	78.4211	84.0729	64.5636	82.9896	97.8653	95.8708	33.0568	32.1097	30.2944
4933403L16RIK	79.884	69.6585	66.8249	72.0865	80.0983	85.9436	35.2362	31.1558	28.6544
4933404M02RIK	86.5203	68.3242	59.6634	67.0418	68.1726	70.2697	32.1626	28.4146	27.4095
4933404O11RIK	71.6708	72.395	62.9462	69.949	66.6656	68.5687	32.3995	30.378	29.1502
4933405A16RIK	59.2496	59.7774	52.3729	67.4315	57.2676	66.4111	35.0373	24.9964	29.6362
4933405K07RIK	63.0963	57.4344	54.113	63.0001	65.8695	70.2769	32.2838	28.4455	32.2862
4933405K18RIK	57.8973	52.2503	50.8302	57.2653	55.7557	60.1602	32.0239	25.8737	23.4008
4933405O20RIK	71.7112	55.1349	57.4677	69.9567	77.1615	76.1403	41.901	30.853	31.4829
4933406A14RIK	92.1399	72.7519	65.9313	83.3202	87.2312	81.8769	38.8339	33.9984	29.6797
4933406J04RIK	77.9468	63.6586	53.3233	68.0013	70.3519	69.9015	29.6524	25.0782	25.3666
4933406M09RIK	62.6751	65.6597	50.3362	63.3393	77.4234	70.4696	35.519	26.5788	25.7495
4933406N12RIK	82.9194	64.3359	76.8532	77.6981	77.7668	75.5307	37.0714	30.7433	28.8482
4933407I18RIK	66.4935	63.9587	63.4142	67.169	76.3705	70.4891	34.232	27.8071	28.6476
4933407N01RIK	471.912	353.414	191.108	513.995	496.318	473.986	165.878	105.371	122.907
4933407P14RIK	91.7289	76.3008	69.9999	156.765	154.937	159.159	45.3384	34.3518	38.5425
4933408B17	61.8397	57.7239	53.389	58.1382	59.1789	61.1188	29.4514	26.5909	24.9011
4933408F15	78.3989	75.3555	69.4299	84.6551	86.152	88.8838	38.9901	31.3153	30.688
4933408N02RIK	59.9055	64.9566	54.8158	90.588	92.8677	84.0274	33.9953	30.3586	29.8752
4933409G03RIK	76.4587	72.5724	57.1519	64.039	63.9527	66.2695	30.7879	29.7497	25.9418
4933409I22	59.5036	59.7565	63.0185	59.1088	60.1992	56.2835	28.7984	27.0173	29.5532
4933409N07RIK	92.2581	74.0806	55.1471	75.8237	71.5222	75.5155	30.1056	21.0708	25.2331
4933411C14RIK	72.6316	53.2983	53.6937	73.2304	65.3301	64.7864	39.6652	24.355	30.0546
4933411G06RIK	71.6835	63.1227	58.499	72.4074	72.6389	65.5592	33.4084	26.5286	27.3322
4933411G11	51.3049	68.9876	61.9792	54.5426	65.561	67.5623	34.2452	28.5501	27.18
4933411K20RIK	716.68	626.154	292.499	1002	967.659	930.038	296.401	215.791	244.999
4933412E14RIK	66.2762	56.1075	56.6353	92.151	84.5827	84.4049	37.2797	29.2146	30.223
4933413B09RIK	76.0095	77.2745	58.5348	60.2783	81.3148	73.0343	34.7807	28.417	30.8677
4933413G11RIK	66.9161	63.7453	50.2167	64.6541	64.2291	77.5609	28.0632	27.4996	23.1159
4933414E04RIK	69.4071	71.4419	72.6219	76.9921	83.0035	77.7229	37.1153	33.0855	27.3062
4933414G08	64.0224	78.54	59.3689	99.7136	102.618	111.327	38.3208	27.0864	23.6045
4933415F23RIK	64.5213	59.3394	63.1192	61.7192	66.5542	67.5089	32.775	24.3392	24.971
4933415L06RIK	60.3846	61.755	65.7981	65.0844	76.7927	69.8774	32.2799	30.1166	26.1674
4933416C03RIK	85.9621	88.6529	66.7591	90.1078	87.9664	89.62	45.6616	39.3005	30.4141
4933416E05RIK	78.8949	71.6296	64.693	74.0082	87.3773	80.2336	42.2593	33.9424	30.4231
4933417A18RIK	64.3078	61.5497	57.2551	87.913	89.1379	71.5065	31.0056	28.9528	28.2707
4933417E01RIK	76.3171	76.6833	66.1994	87.812	102.265	85.6115	45.9405	34.3708	35.5335
4933417K04RIK	149.843	142.914	129.692	123.813	124.371	125.672	44.0194	43.88	42.4908
4933417K05RIK	65.5306	72.3128	56.3987	56.0297	63.2361	80.4165	25.8627	30.2347	26.474
4933417L02RIK	86.3505	62.4735	51.5085	71.2753	64.0007	64.5131	32.1647	27.7351	22.7589
4933421E11RIK	177.76	178.099	134.37	226.364	218.844	212.95	66.0679	56.8469	55.5448
4933421I07RIK	60.3817	64.8274	52.6621	64.4314	65.5575	60.5088	33.1196	31.7756	27.9692
4933422H20RIK	70.8612	61.3483	61.4905	64.7275	78.1802	69.5161	32.7205	25.3906	27.4024
4.93342e+23	66.5806	61.2101	66.0641	82.9076	83.1016	84.0768	44.3406	29.983	29.1583
4933424A10RIK	56.5057	50.3381	48.6439	66.9232	75.5203	75.4128	40.0914	30.0839	29.599
4933424B01RIK	603.202	720.19	326.619	990.581	993.94	813.745	295.179	365.988	247.937
4933424F08RIK	81.5786	64.9153	67.2014	88.4528	105.809	96.2535	46.7927	33.4214	33.1682
4933424M23RIK	3510.78	2742.45	2074.43	4039.72	3727.13	3370.82	870.966	1094.37	790.073
4933424N09RIK	110.753	110.06	78.4677	160.726	155.147	154.492	48.1254	51.499	39.7356
4933425F06RIK	72.9959	52.9033	56.1073	57.4172	62.0867	65.5937	27.1375	23.6586	26.7197
4933425I22RIK	372.672	228.337	129.7	1218.48	1031.35	819.168	208.408	270.228	173.872
4933425K02RIK	66.158	64.6819	55.9554	67.9287	68.0437	68.1859	35.6911	29.9752	26.8152
4933425L06RIK	65.7939	59.0114	52.0916	61.984	63.3371	74.3503	38.9867	30.2737	29.1237
4933425M15RIK	67.7183	50.6761	54.7699	60.9254	53.9049	55.1165	34.7411	26.7083	25.8454
4933425O20RIK	67.8325	66.315	57.4348	65.0774	74.2107	70.9557	34.0977	25.8165	23.2367
4933426L22RIK	76.3439	82.8264	70.9231	89.7649	92.5932	84.8548	41.7887	40.4815	37.8551
4933426M11RIK	371.834	328.384	151.928	970.25	784.102	730.833	136.802	187.323	133.531
4933427D06RIK	44.7284	40.1123	40.3018	46.2368	60.8689	49.365	26.9495	24.9929	21.9491
4933427D14RIK	134.114	260.551	233.951	506.479	417.567	382.371	98.9658	116.157	66.6881
4933427L07RIK	549.75	432.751	260.981	701.699	759.648	657.318	225.523	195.458	212.572
4933428A15RIK	59.9396	58.581	54.2758	63.6473	69.4442	65.0621	32.108	24.6686	30.4147
4933428G09RIK	68.504	65.4147	60.7351	101.144	110.985	106.253	37.687	33.418	28.4626
4933428G20RIK	97.5463	68.2973	63.3493	97.4603	82.0196	91.5544	43.9941	36.5219	38.3435
4933428I03RIK	138.762	118.985	103.696	130.587	123.111	117.41	34.7861	33.7623	33.4011
4933428M03RIK	65.5004	63.0883	55.5811	68.5936	77.6637	73.4514	34.7897	26.8889	29.0874
4933429E10RIK	67.3568	65.1778	61.6829	82.0502	75.5768	90.4885	39.1031	32.389	31.004
4933429F08RIK	79.028	64.9727	68.407	76.3552	70.8991	68.4217	35.7506	33.6142	34.7891
4933429I20RIK	72.1355	61.4595	60.4809	68.425	70.0854	76.1137	29.0782	26.228	27.2567
4933430F08RIK	80.3664	63.9289	64.7401	71.2921	78.4926	65.8085	37.4462	28.0219	33.808
4933430I17RIK	61.754	59.3649	52.9684	68.5631	77.8851	66.023	35.9348	29.2758	31.0131
4933430J11	58.6741	60.9721	52.193	84.4955	86.2512	81.5019	44.6279	34.3944	30.8918
4933432H23RIK	59.1822	54.2006	50.5384	61.3227	67.0056	63.6499	32.8546	26.1318	30.9054
4933432P15RIK	82.5648	83.3149	73.9129	91.7769	93.2405	85.041	35.1336	31.6608	37.9
4933433P14RIK	67.6769	60.8137	51.7495	70.8534	68.8961	65.357	29.1275	27.661	25.407
4933434E20RIK	469.427	371.739	281.139	826.524	769.024	687.478	227.216	181.505	160.129
4933434G05RIK	75.8969	56.8387	60.831	71.6985	80.6147	75.4401	35.826	26.6012	30.183
4933434I06RIK	70.7613	57.7461	48.4119	52.8689	57.1428	60.4524	30.6423	23.5291	26.9023
4933434I20RIK	62.5635	54.51	59.3724	80.7568	94.9458	80.8223	41.3025	32.2753	36.7786
4933435A13RIK	144.823	151.37	111.448	159.011	170.203	151.605	56.3467	53.3356	49.5286
4933436I01RIK	71.3872	64.363	54.6117	78.5767	72.9259	70.3234	33.6597	30.1765	28.097
4933437F05RIK	64.6105	58.3037	49.2593	64.6025	57.5203	61.8503	28.9661	26.1234	28.1641
4933437K13RIK	53.9257	50.432	51.5782	56.7454	61.9983	61.488	28.7298	27.3719	29.1783
4933439A12RIK	63.8279	64.1152	50.4261	67.8646	65.8783	80.1371	38.35	27.509	26.8443
4933439C20RIK	1571.58	1624.57	830.168	2049.28	964.04	1636.37	242.623	476.834	308.154
4933439F18RIK	70.3712	67.3634	55.5035	62.4483	65.4955	67.857	35.4888	26.3868	27.7671
4933440H19RIK	76.1705	68.2106	56.3698	81.5104	93.5591	89.3036	42.4785	33.0643	33.5146
5031400M07RIK	97.4589	99.9722	67.3261	144.349	141.885	135.073	43.7672	40.2322	40.5317
5031404N07	72.4577	70.385	57.2108	72.1291	68.8509	67.3946	33.9877	35.2389	28.2944
5031408O05RIK	53.7902	59.2206	54.2199	60.1684	63.8511	69.2736	33.2703	26.7148	27.5979
5031410I06RIK	79.1992	76.0348	70.1262	72.4855	82.4485	78.2723	42.0794	26.1783	26.2796
5031414D18RIK	63.812	57.0074	52.5786	80.7739	69.7956	76.1426	38.5934	26.5968	27.6454
5033405K12RIK	387.609	406.346	136.791	670.712	633.354	676.488	269.591	169.018	184.019
5033406L14RIK	73.561	75.9355	59.3758	118.849	106.543	112.555	36.1959	30.8282	31.7705
5033413D22RIK	59.1861	52.2543	45.3369	82.9746	84.6859	80.1139	31.8621	27.3495	25.9604
5033413H12RIK	196.063	161.289	93.499	293.033	283.212	295.474	79.5553	61.7897	66.9962
5033414D02RIK	2663.96	2308.08	1690.4	2716.47	2683.26	2461.65	1050.65	823.113	830.908
5033425B17RIK	1079.42	866.214	724.282	1585.61	1504.79	1616.88	365.369	379.137	320.572
5133400D11RIK	66.0082	50.5875	46.6684	60.8445	57.3682	53.3785	36.483	24.3327	28.9399
5133400G04RIK	196.95	178.347	151.755	256.034	315.945	305.146	112.022	70.0605	88.7505
5133401N09RIK	247.121	216.686	148.053	826.167	763.092	809.045	154.808	122.936	128.806
5230400G24RIK	177.084	161.75	109.071	395.638	394.555	364.098	107.689	82.3307	81.3679
5230400J09RIK	77.7502	81.3793	60.19	82.1368	91.8219	79.2753	34.1411	30.0293	29.3687
5330401P04RIK	254.19	195.452	171.008	379.164	354.454	384.977	72.0233	69.2218	79.6732
5330408M12RIK	79.2066	81.9014	67.0156	62.231	65.2923	73.2005	31.2929	28.8852	27.335
5330408N05RIK	100.853	99.4303	71.1675	176.671	187.623	177.527	56.0881	52.5725	43.6386
5330410G16RIK	73.2814	65.2165	54.2207	63.9055	60.0707	69.2503	30.0404	28.1695	24.3871
5330414D10RIK	1139.65	1040.85	554.99	1522.24	1179.22	1152.5	251.751	406.184	334.664
5330417C22RIK	66.0794	60.6656	58.2121	60.2075	66.2708	63.7863	26.4351	37.1448	30.3135
5330421F07RIK	66.4902	63.1374	59.2831	70.6758	76.0098	70.7466	36.5481	28.5521	30.178
5330431N19RIK	130.124	95.3103	74.2548	163.433	186.481	193.683	60.4081	36.9317	41.9663
5330431N24RIK	65.8394	60.0506	51.9218	73.5225	76.1741	86.8626	35.1489	27.3433	28.1184
5330437I02RIK	65.5157	59.9684	61.0221	68.7025	64.3912	75.8871	31.0783	25.804	26.9013
5330438E18RIK	75.963	71.4048	58.7111	79.0895	90.8989	71.7057	32.641	28.4139	30.1759
5330439B14RIK	53.8001	63.3467	53.5625	57.3825	60.6283	52.0021	30.0891	25.4223	26.9933
5330439C02RIK	67.3345	54.5975	53.5211	69.5281	70.4117	59.538	31.8757	28.1804	29.4429
5330439J01RIK	67.717	67.2378	57.5863	78.5828	78.1133	84.9736	33.8463	28.284	27.3072
5330440M15RIK	161.238	130.012	93.003	138.685	137.727	135.982	47.2097	45.029	35.636
5430400N05RIK	305.218	236.102	94.9514	573.206	473.202	450.902	113.375	116.863	113.516
5430401O09RIK	89.2678	86.9152	80.3282	99.5729	95.5727	97.8984	41.8782	37.7747	32.9928
5430407P10RIK	60.8995	53.0033	46.3338	82.347	75.8215	68.334	28.4121	30.0113	27.0674
5430413I02RIK	72.8017	70.5561	71.8092	72.1786	93.1642	82.6281	50.6387	36.671	37.4478
5430413K10RIK	66.8069	64.9577	54.7185	61.3975	70.6825	66.9303	31.9571	28.1178	26.7259
5430416O09RIK	72.0268	77.2611	55.3122	89.5435	96.2203	88.3069	30.4894	23.7138	25.6866
5430419D17RIK	69.9925	67.7984	56.5906	63.1034	60.876	61.1383	29.647	26.2547	22.5852
5430420C16RIK	66.6253	61.6458	59.95	98.2162	97.9059	98.1269	36.462	22.9641	22.1498
5430425C04RIK	66.575	62.9293	52.9621	73.4525	76.8251	80.4829	33.4907	28.5496	32.4406
5430428G01RIK	213.323	205.615	147.971	241.118	338.101	261.955	76.286	85.0073	59.7219
5430431G03RIK	77.8689	69.6089	66.3941	68.3737	66.7342	71.332	36.16	26.2553	26.4414
5430432M24RIK	114.029	112.625	78.6896	94.7787	104.692	103.307	48.6348	40.6519	42.1489
5430435G22RIK	87.8596	65.6584	60.0921	78.3245	83.2507	73.8923	40.2134	31.2367	31.8384
5430437P03RIK	457.084	380.833	314.785	593.819	695.435	668.696	338.316	172.611	201.863
5430438H03RIK	85.7795	72.7897	73.7407	78.8983	92.9014	95.8269	47.5816	33.8715	31.8966
5430439G14RIK	65.5723	71.7688	66.9587	73.1123	72.2066	73.2702	32.6202	30.0165	30.1259
5530600A18RIK	142.653	127.374	93.3467	236.569	286.372	279.397	81.4733	66.6592	66.15
5530601I19RIK	267.042	231.387	195.813	229.769	227.34	202.877	49.7625	52.8518	68.4408
5630401D24RIK	78.9841	71.089	61.6724	98.2032	96.2695	99.707	41.0042	30.6022	30.4981
5730402C02RIK	76.8345	67.1213	63.794	67.8992	72.3476	75.2392	34.7222	28.6773	29.2676
5730403M16RIK	170.487	152.267	104.429	187.411	185.835	158.772	72.2936	53.0752	56.3956
5730405M13RIK	82.8478	70.0861	53.1472	111.244	118.164	107.924	44.3743	34.0456	31.6462
5730406I15RIK	110.917	103.411	65.5882	460.533	485.13	379.584	69.0077	51.5271	56.16
5730409E04RIK	52.889	54.6504	54.4111	77.191	73.7219	80.3653	37.2108	25.8802	28.5378
5730409F24RIK	128.761	95.0017	70.2402	114.898	99.5521	112.02	46.0024	33.4364	36.0805
5730410E15RIK	69.2479	74.8133	53.3808	75.1064	76.4222	74.3155	31.8926	27.9772	28.5708
5730410I19RIK	513.18	435.321	222.308	869.534	985.12	844.503	269.422	233.353	230.691
5730411O18RIK	55.882	55.7379	54.2767	83.0067	83.9727	71.6075	40.8539	28.553	29.7971
5730419I09RIK	300.699	315.984	204.625	318.561	367.639	339.502	127.119	93.0057	130.179
5730420B22RIK	70.0294	58.4786	54.1188	59.7053	74.2859	69.3119	34.3977	27.6782	28.3024
5730421E18RIK	66.7242	57.7206	55.2492	58.721	64.7117	69.5584	35.1589	24.8237	28.1828
5730427C23RIK	70.0554	60.8417	50.8196	78.5421	74.8887	78.1833	33.9101	30.0961	24.2235
5730436H21RIK	272.95	246.357	184.616	566.05	592.516	570.556	134.927	115.548	111.981
5730437N04RIK	1376.22	1141.76	698.887	937.196	1137.36	1070.18	380.324	472.873	365.469
5730438N18RIK	85.6967	74.3246	67.3859	96.0702	100.328	97.6978	42.3937	30.7955	30.9689
5730442P18RIK	58.4049	51.6302	48.4472	63.0567	55.9664	64.0831	31.3857	24.3787	21.0517
5730446C15RIK	133.289	123.941	72.7222	293.336	247.048	211.666	49.4156	49.1255	47.5121
5730446D14RIK	68.342	51.6996	58.2503	58.8875	62.1824	63.6405	29.9263	24.7129	27.4006
5730449L18RIK	351.802	284.414	176.888	425.942	611.428	509.486	201.163	123.041	153.76
5730453H04RIK	75.8543	66.8224	56.2951	1640.02	3000.52	1872.11	71.8881	30.0738	26.5748
5730453I16RIK	1128.51	1269.07	779.069	1830.42	1601.45	1419.56	229.131	423.839	392.218
5730454B08RIK	86.2891	85.3473	66.0168	142.081	136.997	136.614	41.3409	38.7268	39.7353
5730455A04RIK	60.5023	47.3599	45.5854	66.3089	80.1693	70.7772	40.9351	24.9642	30.1917
5730458D16RIK	88.0854	75.556	65.0127	128.871	145.419	134.579	55.3051	31.6396	32.8139
5730466C23RIK	163.134	128.6	88.3046	153.496	145.866	128.396	59.3627	60.1557	44.6241
5730466H23RIK	712.046	697.711	452.755	664.924	693.469	585.619	225.504	229.794	195.603
5730466P16RIK	776.191	565.506	270.794	1747.4	1954.47	1718.78	432.844	307.167	293.814
5730469D23RIK	90.2174	88.9553	68.4875	109.624	107.332	104.719	37.374	33.6668	35.3317
5730469M10RIK	81.545	72.6262	59.6444	88.8822	83.1511	69.7579	31.0692	28.4864	30.8357
5730470L24RIK	64.2903	65.4503	52.6631	56.7734	61.7345	56.8164	31.4345	23.5759	24.3609
5730472N09RIK	189.17	158.096	111.349	188.572	204.996	172.775	66.4635	56.8368	65.5704
5730494M16RIK	417.898	287.26	196.855	650.519	696.621	618.102	171.873	212.315	141.44
5730494N06RIK	282.39	333.584	160.075	515.22	617.65	517.638	210.436	136.091	180.582
5730507A09RIK	70.9041	67.5252	56.8143	70.1675	73.3271	68.8123	35.5439	27.3967	28.2492
5730508B09RIK	67.6141	64.3214	49.8933	77.627	82.5174	76.4549	36.0324	33.8485	30.5964
5730509C05RIK	324.793	305.998	147.461	814.665	699.304	732.246	106.019	112.309	113.143
5730509K17RIK	76.466	75.9525	67.8723	122.666	101.746	104.608	38.6488	28.4454	26.6569
5730521E12RIK	54.9255	69.0957	54.4243	58.7057	68.6907	58.7937	33.6168	25.0281	24.2816
5730528L13RIK	57.7066	49.3369	50.3045	112.327	98.3376	86.7773	45.9263	32.9348	34.2389
5730536A07RIK	74.5088	65.0746	54.6975	73.8878	83.1738	76.9617	36.6485	31.0694	28.8161
5730537D05RIK	66.5613	58.6188	56.0545	66.8508	70.0929	69.1822	34.5834	28.3174	26.196
5730538E15RIK	121.199	108.72	68.146	240.689	235.62	196.309	56.047	57.8157	49.4143
5730555F13RIK	684.093	693.217	349.091	1555.53	1417.19	1247.08	298.88	298.399	278.222
5730568A12RIK	101.646	93.9523	81.5308	198.989	172.25	187.781	45.4528	42.2872	38.163
5730577I03RIK	69.4467	62.5182	55.6743	71.5201	68.8136	66.4185	37.5927	29.4224	34.1386
5730578N08RIK	850.287	712.795	463.893	825.821	806.917	693.117	225.655	248.479	186.693
5730589K01RIK	471.418	352.81	158.43	624.128	595.145	527.96	255.651	215.627	204.092
5730589L02RIK	92.2174	85.0021	72.6675	97.6705	109.286	109.926	38.239	29.3811	36.2996
5730591C18RIK	58.8113	47.1825	59.4396	80.6048	91.9472	88.5605	44.0901	30.6891	31.738
5730593F17RIK	870.87	799.724	551.213	1057.92	935.222	783.975	302.151	332.851	282.116
5730593N15RIK	69.0396	71.8905	59.8288	62.4523	63.8602	65.1537	34.848	28.3803	28.1975
5730596K20RIK	124.718	110.026	82.3613	154.173	160.649	149.151	64.4307	46.3797	47.718
5730599I05RIK	219.602	195.826	149.096	321.694	342.97	273.182	94.2747	76.5833	70.1325
5830404H04RIK	146.599	107.938	79.7248	109.809	120.216	115.531	44.514	40.5966	38.2369
5830405N20RIK	1468.1	961.895	525.647	2255.83	2300.94	1829.94	528.047	630.656	628.191
5830411K18RIK	830.961	611.363	544.518	755.778	1026.66	1039.25	448.106	350.327	434.395
5830415F09RIK	140.645	103.844	98.7395	172.098	161.165	146.534	57.9285	44.9656	44.8285
5830415L20RIK	328.814	375.11	142.413	894.121	740.006	740.248	113.619	105.743	108.707
5830416A07RIK	684.238	610.849	305.19	1454.03	1273.65	1102.37	256.815	219.908	194.763
5830417C01RIK	137.861	137.022	88.5131	229.444	247.203	241.562	63.363	55.8598	49.4944
5830418K08RIK	56.1712	52.84	60.1704	60.5535	74.8226	69.6549	32.4449	23.7685	26.4044
5830426I05RIK	140.012	109.81	83.0251	149.949	241.962	200.979	86.7232	67.5568	61.9441
5830427D03RIK	287.621	338.644	233.906	854.278	728.363	609.677	72.7706	163.557	116.777
5830427H10RIK	1072.04	957.008	576.015	1399.54	1395.09	1203.13	363.214	378.665	288.98
5830433M19RIK	115.099	84.5239	82.7028	223.156	212.506	188.262	54.0268	41.4339	44.6959
5830434P21RIK	1413.77	1163.18	725.948	2214.02	1960.38	1687.72	435.883	599.01	505.618
5830435K17RIK	62.2766	66.237	60.526	96.8039	95.7761	81.5683	39.6983	34.8309	35.0816
5830436D01RIK	113.682	126.251	85.5816	141.44	140.04	145.495	47.7619	42.6414	47.3132
5830442J12RIK	74.9144	64.6738	59.5001	88.9444	93.9254	97.4423	42.671	30.3294	29.8011
5830443L24RIK	75.0132	71.6577	61.9299	56.1241	67.2197	63.5994	32.392	22.5693	29.9288
5830457H20RIK	65.0871	50.4165	52.1147	55.9541	64.077	60.6446	31.5775	26.7477	27.0527
5830457O10RIK	145.98	144.649	76.8796	192.792	197.817	182.305	68.8841	58.2852	62.4504
5830461H18RIK	92.9508	93.0161	70.4347	83.4622	74.4437	71.7686	38.6325	36.3427	33.1424
5830467P10RIK	72.8943	62.0011	57.1125	70.6026	75.1003	71.2537	35.5125	30.3274	30.3809
5830468K18RIK	96.0196	135.513	75.8048	156.865	163.608	164.186	51.3991	36.0314	44.5956
5830472H07RIK	319.939	298.415	158.478	788.308	780.702	588.99	65.6289	149.139	93.2462
5830472M02RIK	130.548	120.923	76.006	196.776	199.348	173.391	52.7764	51.5588	61.5197
5830482F20RIK	124.837	105.855	79.0483	531.36	465.281	487.605	61.7933	43.281	59.0874
5830482G23RIK	107.516	105.18	83.7129	108.115	110.35	97.6012	35.777	35.1393	37.0281
5830483C08RIK	64.7978	68.3415	58.0947	56.0228	67.0441	66.4413	31.2928	29.0178	28.8255
5830484A20RIK	59.6757	48.5285	57.536	131.504	164.02	148.694	58.4461	40.4212	41.4134
5832418A03	60.4431	62.7326	56.892	99.5489	81.9125	79.9055	33.4094	28.2753	27.7351
5832424M12	526.671	447.426	356.805	818.469	664.305	583.791	145.875	239.194	188.171
5930405J04RIK	275.789	257.458	117.826	475.46	430.721	389.823	158.081	114.515	121.159
5930412E23RIK	724.005	491.624	276.036	835.353	1174.3	852.041	290.561	194.805	213.676
5930416I19RIK	1776.12	1610.34	1217.44	2199.83	2793.86	2370.84	765.565	755.74	610.107
5930431H10	83.8315	86.7	57.0301	122.524	113.646	130.382	44.9469	37.3793	37.2012
5930434B04RIK	140.603	138.851	79.894	193.765	204.15	181.995	56.5352	49.7104	46.2261
6030404E16RIK	73.0015	63.849	55.6425	65.3244	69.5165	69.797	32.4869	25.8332	32.3621
6030405A18RIK	72.0744	67.3598	50.4837	65.2091	67.2322	68.1966	30.4129	29.2775	31.132
6030408B16RIK	82.4184	80.8081	69.1206	85.3524	86.7074	89.9647	36.8377	31.4274	29.6722
6030410K14RIK	70.7426	56.0706	55.2349	53.7282	59.6371	65.9029	28.2656	25.4506	25.4571
6030411F23RIK	65.8422	59.6129	49.7467	58.8009	64.6284	64.8159	34.029	26.259	27.8924
6030419C18RIK	70.4999	67.448	63.7031	97.5619	102.196	109.812	41.8387	28.7831	32.5953
6030429G01RIK	68.3258	66.8967	56.7451	71.6959	73.2273	72.0281	32.6385	26.4614	30.703
6030441F14RIK	75.9531	72.4994	63.7106	63.7649	72.8888	76.8518	34.8765	28.7172	27.0454
6030443O07RIK	892.271	847.707	775.48	868.13	924.581	718.934	200.075	256.372	209.106
6030446I19RIK	177.576	135.757	83.7766	183.814	211.963	174.058	68.0537	52.4862	54.8588
6030446N20RIK	81.9041	69.7011	65.4852	74.3878	81.3686	79.4925	46.8482	33.7997	33.7998
6030457N17RIK	493.396	415.443	256.497	925.944	1012.66	806.262	302.26	194.989	181.08
6030458C11RIK	111.881	124.595	83.8643	283.863	318.294	276.733	57.4316	55.8937	47.7313
6030458H05	444.751	324.806	201.493	408.302	430.796	433.978	147.496	127.62	124.892
6030463G20RIK	65.2678	63.9374	53.6612	89.0974	89.5591	89.8386	30.3645	33.3462	26.7255
[truncated: 16,119 more rows]

## Sheet: Normalized_Data
Gene_Symbol	DP_1	DP_2	DP_3	ICN_DP_1	ICN_DP_2	ICN_DP_3	ICN_DP_Mir-181ab_null_1	ICN_DP_Mir-181ab_null_2	ICN_DP_Mir-181ab_null_3
0610005K03RIK	5.74002	5.64026	5.74536	5.71147	5.70245	5.57218	5.73722	5.78618	5.50325
0610006F02RIK	5.83004	5.7937	5.93673	6.68321	6.51971	6.48289	6.10669	6.17495	5.63565
0610006I08RIK	10.7523	10.5823	10.9996	10.16	10.1707	10.2143	10.6543	10.5251	10.2787
0610006K04RIK	7.5227	7.37561	7.45096	7.49087	7.68926	7.54408	8.44407	7.31009	7.47605
0610007C21RIK	9.20513	9.03143	9.12324	9.16224	8.90947	9.01862	9.03014	8.55892	8.94149
0610007H07RIK	9.84737	9.81457	10.0923	9.48184	9.80886	9.90243	10.216	9.77508	9.88717
0610007P06RIK	9.68891	9.73575	10.2328	9.13181	9.36221	9.4248	9.65725	9.52182	9.43356
0610007P08RIK	5.67156	6.54987	6.63144	6.33712	6.55909	6.47894	5.7411	6.17649	5.93002
0610007P14RIK	8.1123	7.77614	8.07693	7.95105	8.46548	8.13689	8.32663	7.692	7.77101
0610007P22RIK	8.51315	8.35397	8.12871	8.75176	8.61436	8.67482	8.44033	8.40573	8.28364
0610008A10RIK	5.86497	5.93723	5.8903	5.4868	5.76672	5.64994	5.98974	5.75099	5.82287
0610008C08RIK	6.02029	6.01985	5.88101	5.96141	5.77269	5.85905	5.99325	5.9039	5.52296
0610009B10RIK	5.66058	5.66236	5.75276	5.74311	5.67129	5.91589	5.94168	5.81169	6.14143
0610009B22RIK	8.00046	8.15877	8.03473	7.60767	7.96424	7.98595	8.31973	8.09371	8.08818
0610009C03RIK	5.92085	5.96964	5.6569	5.82638	5.85705	5.76653	5.82501	5.96953	5.73966
0610009D07RIK	6.20594	6.0563	5.99763	5.96685	6.09654	5.98736	6.18868	6.16485	6.06609
0610009E20RIK	9.844	9.63484	9.78455	9.49583	9.62477	9.5682	10.0956	9.85574	9.61837
0610009F02RIK	10.3082	10.2181	10.529	9.25198	9.349	9.45134	9.65586	9.81457	9.9207
0610009I22RIK	7.38414	7.16861	7.07431	6.87308	6.97514	6.96852	7.39552	7.39552	7.15994
0610009J22RIK	7.0882	6.98277	6.96092	6.76785	6.63976	6.46363	6.08651	6.65115	6.80061
0610009K11RIK	7.7264	7.54408	7.25511	8.40438	8.39939	8.28992	7.71082	8.20817	8.13004
0610009M14RIK	8.87165	8.68587	9.18908	8.63147	8.5507	8.48913	8.91305	8.88361	8.81197
0610009O03RIK	7.861	7.72543	7.81297	7.33023	7.45354	7.4773	7.75957	7.95923	7.83521
0610009O20RIK	7.68869	7.83521	7.905	7.21558	7.17667	7.31047	7.53254	7.2975	7.39831
0610010D20RIK	5.82425	5.75505	5.68847	5.93373	5.92967	5.98474	5.75969	5.81076	5.72213
0610010D24RIK	6.42058	6.08894	5.88721	6.3572	6.32852	6.41341	6.51669	6.78409	6.48915
0610010E21RIK	8.23505	7.80725	8.09024	8.69568	8.45391	8.65847	8.47293	7.94427	7.89892
0610010K06RIK	11.0429	10.7421	11.0564	9.99806	9.93516	9.67152	9.95451	10.5069	10.3964
0610010K14RIK	8.2377	8.2795	8.78719	7.86349	8.17432	8.05432	8.36374	8.19516	8.05744
0610011B16RIK	6.24421	6.01135	6.55072	6.99682	6.76856	6.65275	6.27278	6.30301	6.19505
0610011L14RIK	5.81415	5.83821	5.99424	5.97723	5.95043	6.08474	5.90745	5.90525	5.96989
0610011N22RIK	7.73948	7.90165	8.00965	7.19955	7.2364	7.2129	7.8902	7.7901	7.79316
0610012A05RIK	5.63015	5.55048	5.71548	5.74328	5.64749	5.65843	5.63069	5.72879	5.45021
0610012A11RIK	5.73573	5.85791	5.96319	5.77287	5.74542	5.99878	6.06966	6.12899	6.15881
0610012C01RIK	5.98804	5.89856	5.77955	5.85099	5.86118	5.92396	5.54766	6.03646	6.04766
0610012D14RIK	5.60888	5.71339	5.73761	5.86424	5.89175	5.85884	5.65506	5.80049	5.68229
0610012D17RIK	7.3125	7.33743	7.5097	6.9753	6.86307	6.71877	7.48255	7.30891	7.08961
0610012G03RIK	9.00284	9.03545	9.00284	9.85316	9.86571	10.0228	9.57392	9.55465	9.36221
0610012H03RIK	5.73951	5.88654	5.68989	5.88026	5.90779	5.89316	5.70052	5.75388	5.5194
0610012K18RIK	6.62417	6.38096	7.29493	6.4407	6.26687	6.41423	6.16749	6.46295	6.43415
0610013E23RIK	5.66149	5.57996	6.54314	6.02537	6.00872	5.78018	5.26786	5.93648	5.88236
0610025L06RIK	8.28325	8.18596	8.31691	8.03977	7.83217	7.69418	8.12498	8.10878	8.18928
0610025O11RIK	5.95021	5.97879	5.62345	5.53713	5.7278	5.69867	5.80584	5.70149	5.99403
0610025P10RIK	6.8341	7.08073	7.09895	6.59668	6.70075	6.73454	6.79965	7.14617	6.85696
0610027B03RIK	5.86378	5.88957	5.71925	5.916	5.88271	6.06271	5.97771	5.78632	5.80353
0610027O18RIK	8.06892	8.21453	8.32324	7.99356	7.94608	7.93052	7.75862	7.54562	7.55913
0610030H11RIK	7.09696	6.58931	6.8588	6.21546	6.33309	6.37055	6.61488	6.54789	6.62304
0610031J06RIK	8.12408	7.98501	8.00046	8.44852	8.26527	8.23713	8.44794	8.2447	8.30826
0610033E06RIK	5.497	5.56422	5.55394	5.52341	5.48502	5.45514	5.6904	5.56486	5.82463
0610033H09RIK	10.2245	10.1035	10.4943	9.92196	10.1541	10.2851	10.9996	10.2624	10.5042
0610034P02RIK	6.78145	6.89678	7.18987	6.11921	6.40179	6.50225	6.25915	6.71124	6.76062
0610037D15RIK	6.57559	6.65331	6.71509	6.33073	6.664	6.56472	6.50225	6.6042	6.78054
0610037H22RIK	5.92355	5.87923	5.75485	5.90567	5.86207	5.98916	6.37236	5.81652	6.11075
0610037L13RIK	7.81534	7.72677	7.8956	7.39077	7.64093	7.54562	7.64652	7.68313	7.74962
0610037P05RIK	5.68584	5.97569	5.79509	5.61175	5.71567	5.60245	5.7695	5.73675	5.66696
0610038F07RIK	8.09931	8.39939	8.39656	8.1263	8.08979	7.96424	8.3882	8.19839	8.34959
0610038K03RIK	6.05251	6.13207	6.07022	5.79685	5.90551	5.97412	5.8881	5.91299	6.10311
0610039D01RIK	9.25903	9.15196	9.51192	8.99003	9.0831	9.05392	9.5682	9.521	9.42369
0610039J04RIK	7.76363	8.03366	8.26188	7.34277	7.52444	7.64208	7.48098	7.71439	7.64879
0610039N19RIK	6.80137	6.69349	6.50352	6.40439	6.5202	6.45553	7.05093	6.71311	6.58582
0610039P13RIK	7.32417	7.43193	7.2235	7.6865	7.6152	7.67466	8.0183	6.89121	7.19428
0610040B21RIK	8.86889	8.89616	9.03664	9.81457	9.91297	9.80069	9.87706	9.03358	9.38287
0610040D20RIK	5.73027	5.73083	5.63971	5.52484	5.47405	5.5613	5.6964	5.50074	5.72345
0610040J01RIK	5.59667	5.95257	5.75833	6.03469	5.80149	5.84026	5.62719	5.73525	5.83407
0610041B22RIK	8.2888	7.92145	8.025	9.51033	9.41769	9.39453	8.63712	8.95576	8.98583
0610041E09RIK	7.93292	8.04224	8.28574	6.99182	7.39295	7.13953	7.98535	7.61176	7.87145
0610041G09RIK	5.67015	5.55404	5.69888	6.14318	5.84444	5.8495	6.31504	5.71023	5.7568
0610042E07RIK	5.59053	5.71638	5.67618	5.98435	6.01169	6.04432	5.98851	5.62861	6.24972
0710001B24RIK	7.41304	7.0854	7.4293	6.55345	6.55717	6.47991	7.07086	6.85894	6.84225
0710001E13RIK	9.83309	9.98382	10.1193	9.4699	8.87274	9.10089	9.19502	9.6004	9.66624
0710005M24RIK	5.80467	5.82712	5.73344	5.72322	5.52249	5.67377	5.59017	5.66159	5.77059
0710007A14RIK	10.2576	10.436	10.675	9.79553	9.75076	9.75573	9.95722	10.0998	10.086
0710008K08RIK	9.78195	9.9207	10.1844	9.20647	9.1781	9.31321	9.70505	9.71015	9.84188
0910001A06RIK	6.73832	6.84637	6.72738	6.97695	6.9662	6.853	6.21708	6.45829	6.83733
0910001K20RIK	5.62072	6.06902	5.95633	5.74487	5.74539	5.68749	5.72743	5.7721	6.06119
0910001L09RIK	11.1368	11.0401	10.7649	10.3525	10.1716	10.363	10.6067	10.6623	10.5098
1010001D01RIK	5.60403	5.57278	6.14258	5.66536	5.78036	5.74197	5.92825	5.78983	5.79394
1100001A21RIK	7.6637	7.18808	7.40539	7.78526	7.60418	7.58785	7.43788	7.44236	7.49975
1100001D10RIK	9.88717	9.80623	9.36344	9.80886	9.81096	9.67903	9.93103	9.953	9.78721
1100001E04RIK	5.67296	5.82401	6.06739	5.84716	5.96012	5.78107	5.87932	6.03855	5.7579
1100001G20RIK	5.73352	6.14318	5.6749	8.2556	7.27477	7.69663	6.55815	5.86035	5.57164
1100001H23RIK	5.79499	5.85425	6.25109	6.01796	5.97063	5.83698	5.88993	5.86091	5.96075
1100001I19RIK	5.6497	5.62283	5.94123	5.66292	5.63808	5.59146	5.34506	5.42477	5.40627
1100001I22RIK	11.8461	11.8145	11.5735	11.8591	12.0355	11.966	12.1473	12.0542	12.0647
1110001A05RIK	6.54555	6.29679	6.22763	6.67265	6.58055	6.51336	6.42357	6.10353	6.33358
1110001A07RIK	7.53366	7.59045	7.70793	6.88631	7.41756	7.27069	8.09931	7.89077	7.90648
1110001A12RIK	8.93929	8.74442	8.59634	10.7741	10.8333	10.792	9.64255	9.58387	9.33926
1110001A23RIK	6.96731	6.93598	7.27915	6.90183	6.73695	6.85032	7.49988	6.65989	7.09038
1110001C20RIK	8.46956	8.29252	7.68542	7.56597	7.48695	7.49208	7.63523	7.99003	7.60418
1110001E17RIK	6.4371	6.30966	6.37395	6.37803	6.13466	6.16003	5.73409	6.60721	5.9048
1110001J03RIK	7.16362	7.00721	6.80478	8.34356	8.67235	8.77015	8.32622	7.76715	8.06182
1110001K21RIK	10.086	10.0133	9.94941	10.3234	10.3952	10.3082	10.3572	9.91471	10.031
1110002B05RIK	10.1647	10.3068	10.5506	10.529	10.6662	10.6103	10.8446	10.6976	10.7818
1110002E23RIK	8.18326	8.35615	8.89364	7.56177	7.58624	7.51806	7.79212	7.73426	7.77506
1110002H13RIK	5.74396	5.54894	5.68182	5.78815	5.66018	5.70791	5.69509	5.83577	5.62617
1110002N22RIK	7.52046	7.28186	7.36733	7.11587	7.00751	7.25326	7.4328	6.79508	6.96698
1110003A17RIK	9.72136	10.3392	10.7483	9.93103	9.4914	9.41292	9.16096	10.1782	9.95451
1110003E01RIK	10.5203	10.4141	10.375	10.6875	10.3758	10.3105	10.766	10.5203	10.5609
1110004B13RIK	6.18527	6.0782	6.15583	6.05703	6.25054	6.10734	6.28164	6.11119	6.31866
1110004B15RIK	6.4659	6.86642	6.61598	6.57382	7.02932	6.49427	6.92505	6.84062	6.46827
1110004E09RIK	6.04235	6.05793	5.92921	5.92271	5.99528	5.91101	6.25347	6.15194	5.86852
1110004F10RIK	6.12624	6.12184	5.98273	6.00956	5.9989	6.1116	6.06463	5.9316	5.7799
1110005A03RIK	6.73584	6.42408	6.22266	6.853	7.59563	7.13552	7.0052	6.78145	6.90695
1110005A23RIK	7.09937	7.37787	6.64077	8.58859	8.58743	8.69006	8.4174	7.82331	7.95637
1110006G06RIK	7.1239	7.16966	6.89742	6.86766	6.9204	7.06997	7.02887	7.11947	6.97473
1110006I15RIK	8.89616	8.39456	8.40706	9.47753	9.606	9.73374	9.37295	8.93503	9.20077
1110007A06RIK	7.73247	7.51002	7.4528	8.22886	7.80872	7.87399	6.65708	7.41437	7.23149
1110007A13RIK	8.74391	8.62268	8.91916	8.59262	8.63038	8.65694	8.4608	8.59339	8.82668
1110007C02RIK	5.85494	6.0093	5.55533	6.48674	6.10642	6.09306	6.03446	5.95953	6.13366
1110007C05RIK	7.7927	7.48061	8.20817	7.49118	7.3889	7.69882	8.55337	7.41049	7.41824
1110007C09RIK	5.92454	6.27092	6.42338	5.85135	5.79813	5.71427	5.88232	5.80285	5.78466
1110007C24RIK	10.1178	9.83796	9.89806	9.3596	9.33556	9.14863	9.16579	9.88044	9.51649
1110007F05RIK	5.88161	5.81076	5.77792	5.90738	5.80252	5.98621	5.91555	5.66108	5.83588
1110007F12RIK	5.64315	6.03001	5.85924	6.02163	5.91996	6.00582	5.77566	5.65258	6.05185
1110007H17RIK	5.77063	5.7248	5.70522	5.82958	5.71902	5.71806	5.48293	5.39194	5.74027
1110007L15RIK	9.00194	8.7794	9.06026	9.01862	9.08073	9.0388	9.26833	9.11668	9.1756
1110007M04RIK	8.32895	8.586	8.73457	8.30058	8.79492	8.96738	8.16031	7.96935	7.87071
1110008F13RIK	8.34447	7.89628	7.73185	8.70001	8.71117	8.64277	8.61033	8.75702	8.52231
1110008J03RIK	6.19111	6.14664	6.14951	5.99654	6.04576	6.07129	5.89628	6.16241	6.12553
1110008K04RIK	6.03829	5.79157	5.93356	5.8244	5.83004	5.7994	5.62949	5.78539	5.74589
1110008P14RIK	8.95962	8.81127	9.15904	9.62933	9.23687	9.20936	9.01657	8.64883	8.30285
1110011D13RIK	5.46762	5.58747	5.6777	5.62734	5.74093	5.49934	5.69194	5.57724	5.84569
1110011K10RIK	8.48468	7.96935	8.17928	8.4157	8.87813	8.73225	8.77888	8.2888	8.3252
1110012D08RIK	7.46683	7.2685	7.66988	7.04533	6.87373	6.80452	6.63037	7.13585	7.23983
1110012E06RIK	6.50628	6.84976	6.59321	7.03361	6.94964	6.83914	6.86788	7.14821	6.93348
1110012J17RIK	5.80906	5.62727	5.7584	5.94273	5.91187	5.97781	6.46667	6.33125	5.85884
1110012L19RIK	7.3869	7.05241	7.27148	7.09762	7.12766	7.04351	7.44828	7.2095	7.12584
1110012M11RIK	8.82152	8.57277	8.79653	9.58241	9.68439	9.50675	10.2375	9.41992	9.69554
1110013L07RIK	8.19161	7.74286	7.93824	8.00366	7.93052	8.01085	8.30894	7.84673	8.27529
1110014D18RIK	8.16572	8.19516	8.67917	7.905	8.17342	8.14315	8.54458	8.17342	8.39095
1110014J01RIK	6.21832	6.07349	5.87357	5.84602	5.76451	5.87284	5.65445	5.74635	5.54936
1110014K05RIK	6.42439	6.26139	6.38415	6.1075	6.13049	6.21815	6.38085	6.37426	6.11395
1110014L17RIK	8.02861	7.98128	8.32248	7.55979	7.51806	7.61204	8.19347	7.85877	8.08379
1110014P06RIK	5.69798	6.18601	5.85071	5.99739	6.0363	6.12323	6.28634	6.21708	6.38625
1110015K06RIK	10.0772	10.0326	9.72769	9.88353	9.76043	9.68252	9.9417	9.76043	10.036
1110017D15RIK	6.94504	6.68878	6.40629	6.22285	6.52253	6.38475	6.08341	6.25954	6.36315
1110017I16RIK	5.91875	5.71514	5.83732	5.56034	5.80338	5.61055	5.74683	5.58239	5.56477
1110017O22RIK	8.34218	8.70937	7.9282	9.75888	9.90597	9.58387	9.38508	9.01862	8.7678
1110018G07RIK	9.66837	9.56486	9.51033	9.80623	9.53428	9.5581	9.29267	9.33745	9.27083
1110018J12RIK	6.06618	5.91284	5.95051	5.73276	5.87301	5.78358	5.64674	5.75049	5.56994
1110018J18RIK	6.4184	6.676	6.30459	6.20773	6.23784	6.21507	6.84677	6.53155	6.45276
1110018M03RIK	5.89848	5.66569	5.75958	5.57958	5.75951	5.55745	5.84909	5.69623	5.6964
1110019C08RIK	7.44855	7.63764	6.99893	7.02224	7.18345	7.15503	7.48138	7.44909	7.37911
1110019K23RIK	6.00747	5.91017	5.77902	5.81093	5.74438	5.6054	5.75672	5.77467	5.78828
1110019L22RIK	6.36156	6.12313	5.95065	6.11984	6.10824	6.09102	6.49087	6.24173	6.01017
1110019N10RIK	8.54287	8.59213	8.80457	8.62125	8.8011	8.75429	8.73968	8.7295	8.66371
1110020A09RIK	6.77507	6.98668	6.72678	6.50391	6.69307	6.60953	7.26882	6.79037	7.02932
1110020C03RIK	5.96038	6.08203	6.42357	5.72307	5.79586	5.65351	5.82846	5.94363	5.9056
1110020C13RIK	8.68515	8.23713	8.50209	10.6124	10.4781	10.54	10.2392	8.66252	8.96765
1110020G09RIK	6.10607	6.10194	5.63905	5.87863	5.68901	5.84299	6.34323	5.63949	6.12828
1110020L19RIK	5.96824	6.13234	5.77812	6.2389	6.34485	6.38821	6.47784	6.00114	6.63976
1110020M19RIK	7.44719	7.26502	7.77717	6.93965	7.00029	6.93239	7.2886	7.17989	7.04458
1110020P15RIK	12.0859	12.0542	12.3598	11.8145	12.0647	11.9948	12.2452	11.9948	12.0592
1110021H02RIK	9.69014	9.22355	9.63201	9.62746	9.8057	9.69143	9.33059	9.20596	9.3193
1110021N19RIK	5.85705	5.85807	5.81888	5.64611	5.65766	5.57135	6.11456	5.8004	5.85817
1110025F24RIK	7.67191	7.58827	7.71486	7.37972	7.58652	8.2888	8.21938	7.82037	8.02551
1110025G12RIK	5.75237	5.67038	5.61946	5.82135	5.83087	5.5691	6.01067	5.9829	6.24362
1110025I09RIK	7.13794	7.14587	7.21391	6.48289	6.57894	6.47134	7.03004	6.75225	6.71043
1110028A07RIK	5.85274	6.00785	5.97669	5.51024	5.4773	5.69217	5.78097	5.80651	5.51617
1110028E10RIK	10.6685	10.5524	10.4727	10.0947	9.79113	9.9185	9.93516	10.3801	10.3839
1110028N05RIK	6.33396	6.11911	5.88736	6.10283	5.96847	6.07965	5.92197	6.16144	6.01768
1110029E03RIK	6.09854	5.77502	6.05479	5.9318	5.89943	5.91401	5.79308	5.99458	5.77492
1110030H02RIK	6.23681	5.88164	5.88255	6.2205	6.26342	6.31492	6.07389	6.03371	6.38009
1110030H18RIK	6.05004	6.03659	5.94339	5.71716	5.84366	5.82052	5.86269	5.84486	5.87848
1110030J09RIK	7.31633	7.28067	7.35679	7.59233	7.7061	7.72543	7.58045	7.34277	7.59707
1110030K22RIK	6.11485	5.76099	5.80349	5.78379	5.84114	5.94498	5.77537	5.92494	6.10507
1110030L07RIK	6.17758	5.8978	6.02358	5.78003	5.78766	5.73616	5.89138	6.18207	5.87992
1110031B06RIK	6.58824	6.68321	7.16026	6.20283	6.13539	6.22533	6.328	6.27573	6.3118
1110031B11RIK	5.66452	5.61503	5.9113	5.87096	5.90305	5.86047	6.20226	6.11849	6.05363
1110031I02RIK	5.95279	6.00917	5.95236	6.26377	6.15144	6.24972	6.11182	6.09363	6.06201
1110032A03RIK	6.00653	6.09165	6.01421	5.89175	5.92549	5.81881	5.84284	5.96331	6.05434
1110032A13RIK	8.60455	8.24777	8.4608	8.44927	8.36327	8.3727	8.59992	8.66371	8.59213
1110032D12RIK	7.63972	7.62019	7.18661	8.38759	8.37457	8.49565	7.9602	8.6297	7.90131
1110032E23RIK	5.99528	6.13049	5.92729	5.80797	5.66406	5.69733	5.82463	5.89985	5.91165
1110032N12RIK	9.00012	9.0831	9.16476	9.34038	9.31136	9.42729	9.19302	9.19609	9.28152
1110033F04RIK	5.70393	5.81638	5.84505	5.64935	5.48027	5.51596	5.81315	5.74938	5.65839
1110033I14RIK	5.69884	5.69786	5.60329	5.57068	5.60032	5.60073	5.58094	5.59195	5.87651
1110033J19RIK	5.97334	6.12711	6.1225	5.66195	5.6947	5.81024	5.60403	5.86378	5.43072
1110033O09RIK	5.60776	5.58015	6.12607	5.74098	5.80527	5.76016	5.74216	5.85843	5.90979
1110034A24RIK	6.52206	6.61135	5.91038	6.8471	7.17094	7.07431	7.22065	6.75721	6.98695
1110034B05RIK	5.92434	5.66945	5.98115	5.95848	5.97494	5.89442	5.7292	5.81441	5.88068
1110035L05RIK	6.05753	5.83346	6.22745	6.14134	6.23368	6.06201	6.15781	6.42338	6.569
1110036O03RIK	7.29411	6.96337	6.68487	8.33497	8.50789	8.4382	9.35098	6.75478	7.25246
1110037N09RIK	10.1681	10.2602	9.8348	9.70007	9.76741	9.32868	9.5176	10.1633	10.2538
1110037P11RIK	5.97518	5.97992	5.96394	5.71355	5.70871	5.90906	5.89518	5.60041	5.82865
1110038D17RIK	8.53666	8.24372	8.44268	7.70505	7.52562	7.5872	7.7233	7.86001	7.861
1110038F14RIK	7.38226	7.35624	7.14927	8.65561	8.39684	8.22352	7.92662	7.47501	7.65591
1110039B18RIK	6.90209	6.92924	7.073	6.86788	6.74529	6.76525	6.92271	7.0826	6.93259
1110048D14RIK	6.00358	6.07572	6.00809	5.77081	5.82888	5.85774	5.76217	5.96234	5.59982
1110049B09RIK	5.76233	5.5976	5.83057	5.88042	5.87728	5.92228	5.96723	5.91086	6.1363
1110049F12RIK	8.49962	8.23222	7.82869	8.76934	8.7021	8.56133	8.38759	8.36038	8.35867
1110049G11RIK	8.59133	8.61188	8.8748	8.15681	8.38885	8.41011	9.38024	8.96212	9.09603
1110051B16RIK	5.92142	5.7954	5.80546	5.89856	5.9387	5.94406	5.87628	5.87744	5.87006
1110051M20RIK	5.59252	5.55585	5.51984	5.67119	5.66217	5.6205	5.65289	5.69756	5.71511
1110054N06RIK	8.74807	8.71052	8.65461	8.63712	8.49484	8.39456	8.55892	8.80676	8.90947
1110054O05RIK	5.99704	6.38415	6.14405	6.97824	6.985	6.88833	6.51879	6.3283	6.41423
1110055J05RIK	5.82821	5.78368	5.90099	5.65922	5.67823	5.56156	5.58459	5.73916	5.60148
1110055L24RIK	5.93417	5.76182	6.01101	5.63949	5.44342	5.48392	5.75762	5.87692	5.93883
1110056A04RIK	5.91125	5.66137	5.85567	5.88192	5.92142	5.95816	6.25118	6.00089	6.33712
1110056N09RIK	6.60682	6.81413	6.66538	7.12338	7.14742	7.04297	6.93259	7.0265	7.28011
1110057K04RIK	8.40961	8.25751	8.34532	8.19696	8.27137	8.19235	8.39656	8.17553	8.31143
1110058A15RIK	5.67428	5.8715	5.56327	5.79659	5.80584	5.82401	5.7031	5.71674	6.07885
1110058L19RIK	8.23961	8.34923	7.99072	7.99579	8.01191	8.39684	8.89298	8.15325	8.49484
1110059E24RIK	7.28011	7.5778	7.63764	7.41976	7.45819	7.59085	7.9655	7.51465	8.25426
1110059F07RIK	8.35867	8.57025	8.70001	7.97195	7.92572	7.87255	7.84596	8.26188	8.22204
1110059G10RIK	6.78628	7.03411	7.0867	6.37426	6.38715	6.38715	6.27092	6.80137	6.44457
1110059P08RIK	6.61383	6.45429	5.99586	6.97448	6.78268	6.98315	6.79846	7.35133	6.86238
1110061N23RIK	5.92914	5.96576	5.91005	5.94523	5.84141	5.86397	5.83856	6.06258	6.19674
1110061O04RIK	8.34754	8.14315	8.21661	7.80015	7.79526	7.70342	7.87907	8.33856	8.30997
1110063F24RIK	8.09371	8.04865	7.59844	8.46275	8.15759	8.14964	7.56177	8.05986	7.80771
1110063G11RIK	5.64057	5.5815	5.74516	5.66315	5.84694	5.7006	5.66359	5.74258	5.77539
1110064P04RIK	6.8619	6.64935	7.03187	6.22799	6.3572	6.31929	6.48064	6.3567	6.69307
1110067D22RIK	5.66792	6.14541	5.96612	5.99408	5.89363	5.64908	6.01408	5.87975	6.05316
1110067I12RIK	5.66703	5.94856	5.94842	5.74147	5.84881	5.64226	5.82093	5.82117	5.92876
1190002A17RIK	6.01393	6.10944	6.09388	5.94101	5.97123	5.98859	5.82903	5.81664	5.84946
1190002C06RIK	7.77379	7.48646	7.25359	7.25018	6.82469	6.90483	7.83608	7.5699	7.49454
1190002H23RIK	12.6413	12.6273	12.5128	11.5467	11.3324	11.2409	11.3382	12.4151	11.7239
1190002J23RIK	5.85101	5.57559	5.90292	5.95194	6.06839	5.90733	5.85989	5.73263	5.90738
1190002L16RIK	11.0113	11.0248	11.4459	10.7724	10.8558	10.9388	11.2458	10.5707	10.9282
1190002N15RIK	7.15389	7.01566	6.99832	6.2789	6.29586	6.32011	6.67226	6.83212	6.97514
1190003J15RIK	5.85623	6.02897	6.15112	5.98182	6.04179	6.13681	5.94846	5.96465	6.03892
1190003M12RIK	5.76614	5.71402	5.81131	5.77381	5.80215	5.82143	5.67006	6.24273	6.22184
1190005F20RIK	9.58387	9.52471	9.32106	9.3548	9.26303	9.33059	9.29388	9.48421	9.41769
1190005I06RIK	5.79932	5.87653	5.69824	6.08831	5.97082	6.00077	5.88603	5.9454	5.93266
1190005P17RIK	6.77305	6.91171	6.94771	6.70956	7.04977	7.09762	7.39342	7.19665	7.08417
1190006E07RIK	6.13539	6.03325	6.64341	5.90923	5.69132	5.85318	5.85125	5.91375	5.8053
1190007F08RIK	5.88467	5.66634	5.71298	5.88271	5.87927	5.79008	5.93731	5.93703	5.94101
1190017O12RIK	9.83084	9.38211	9.99806	9.2868	9.52527	9.48597	9.68891	9.5176	9.60513
1200002M06RIK	6.38737	6.15177	5.90194	6.22955	6.27043	6.35167	6.80478	6.21472	6.39429
1200002N14RIK	6.18322	5.76109	6.07601	6.34136	6.00114	6.02582	5.91517	6.12418	5.69113
1200003C05RIK	9.18938	9.15956	9.38849	8.90279	8.85469	8.91776	9.03358	8.95067	9.20513
1200003C23RIK	5.56683	5.66377	5.5879	5.81066	5.88972	5.75889	5.89612	6.29374	5.69373
1200003I07RIK	8.4174	8.26235	8.76113	7.98841	7.99764	7.85133	7.54488	8.04865	7.33899
1200003M09RIK	5.92288	6.06264	6.01605	5.83809	5.87447	5.81766	5.53597	5.69329	5.86497
1200003O06RIK	8.29484	8.17553	8.16283	8.41868	8.22565	8.16695	8.39368	8.24258	8.69481
1200004M23RIK	6.95682	6.62188	7.13463	6.24719	6.34262	6.15781	6.33974	6.73046	6.40092
1200006F02RIK	6.54314	6.85529	6.33742	7.66064	7.72515	7.77912	8.26235	6.54137	7.04937
1200006O19RIK	7.78526	7.89256	7.55913	7.5755	7.58827	7.41686	7.63691	7.6212	7.73426
1200007B05RIK	5.78447	5.68335	5.82115	6.06303	5.84352	5.9691	5.83066	5.79399	5.66273
1200007D18RIK	7.76121	7.79624	7.73514	8.32082	8.24632	8.36659	7.99356	7.83995	7.98535
1200008A14RIK	5.65429	5.83245	5.94432	5.8369	5.74887	5.71779	5.79033	5.7756	5.69965
1200008O12RIK	6.31371	7.71783	7.10634	7.58982	8.0436	8.21355	8.00176	7.93099	8.35126
1200009B18RIK	8.39888	8.34689	8.34923	8.34465	8.32895	8.42103	8.25942	8.15527	8.21898
1200009C21RIK	9.43356	8.56018	8.73605	10.7379	11.0995	10.9282	10.7421	10.3952	10.4761
1200009F10RIK	5.94324	5.54806	5.74813	5.69655	5.74266	5.80715	5.39299	5.83456	6.04235
1200009I06RIK	5.73123	5.64123	5.7417	7.10952	6.9903	7.36483	5.81942	5.54133	5.45843
1200009O22RIK	5.72605	5.78219	5.67942	5.82401	5.67558	5.25803	5.85735	5.52517	5.55834
1200011I18RIK	6.0387	6.10695	6.12567	6.05329	6.0621	6.00221	6.34828	6.03394	6.22285
1200011M11RIK	5.81344	5.75624	5.86203	6.05542	6.04593	6.10877	5.90114	5.8359	5.88001
1200011O22RIK	8.79181	8.86682	8.53118	8.98153	8.94431	8.97777	9.17717	9.01455	9.13567
1200013B08RIK	11.9578	11.8685	11.709	11.9476	12.0798	11.7332	11.3309	12.0592	11.9948
1200013B22RIK	5.87468	5.87022	5.73067	6.38415	6.13792	6.27844	7.125	5.87575	6.25226
1200013F24RIK	7.83401	8.00531	8.06182	7.77871	7.74067	7.89365	7.9668	7.69418	7.73838
1200013P24RIK	6.32566	6.39903	6.31749	6.20782	6.38784	6.45357	6.75478	6.43987	6.55596
1200014J11RIK	9.69143	9.67614	8.79811	9.30804	9.29163	9.34486	10.2044	9.90925	9.98382
1200014M14RIK	5.79609	5.87262	5.63915	5.54833	5.48537	5.54526	5.60176	5.64351	5.62961
1200014P03RIK	8.04305	8.29989	7.98595	7.5847	7.60548	7.41049	7.59609	8.00218	7.83654
1200015A19RIK	9.82757	9.63201	9.74515	9.3445	9.19771	9.20848	9.90597	9.58136	9.69014
1200015F23RIK	7.31202	7.39933	7.17151	7.19793	7.10433	7.21773	7.23727	7.17354	6.98987
1200015N20RIK	5.74098	5.80572	5.70944	5.63038	5.6806	5.63692	5.78478	5.93939	5.90951
1200016B10RIK	8.58494	8.71549	8.95996	8.24632	8.2735	8.13571	8.17342	8.43105	8.31073
1200016D23RIK	7.16933	7.15009	7.19274	7.29116	7.10911	7.2095	7.4389	7.47789	7.34618
1210002B07RIK	5.75819	5.90372	5.68604	5.71433	5.66126	5.73847	5.64104	5.77007	5.72417
1300001I01RIK	6.22908	5.86864	6.02525	6.51336	6.46295	6.71509	5.96529	6.41124	6.46251
1300002C08RIK	5.65469	5.57729	5.84884	5.61596	5.51499	5.57144	5.44449	5.55561	5.54436
1300002F13RIK	9.21184	9.304	9.39076	7.77912	7.23812	7.19868	6.85378	8.62822	7.69577
1300003B13RIK	6.0857	5.90951	6.54448	5.96587	5.92796	5.86704	5.9208	5.73126	5.77587
1300003K24RIK	8.82668	8.63855	8.29757	9.03545	8.93976	9.01014	8.77499	9.01355	8.87551
1300004G08RIK	5.77709	5.88761	5.8534	5.74213	5.65774	5.71574	5.61767	5.63882	5.8448
1300006C06RIK	8.61188	8.66675	8.79492	8.01191	8.11305	8.18421	8.53893	8.47471	8.67992
1300006C19RIK	11.3717	11.6333	11.538	11.593	11.6768	11.5843	11.3933	11.4017	11.3382
1300006N24RIK	7.90758	7.8107	7.57037	7.46517	7.38344	7.49533	7.96522	7.71982	7.64741
1300007B12RIK	8.5491	8.48734	8.25065	8.17432	8.09285	8.2644	8.55392	8.48428	8.66089
1300007F04RIK	6.04289	6.25745	5.98551	6.54118	6.5633	6.50742	6.05547	6.71509	6.53332
1300007L22RIK	5.64808	5.79203	5.87572	5.5862	5.55345	5.56312	5.35175	5.5282	5.45652
1300010A20RIK	5.73779	5.83992	5.60664	5.85199	5.78928	5.72851	5.58883	5.77489	6.02525
1300010K09RIK	6.52187	6.41505	6.40903	6.0099	6.15452	6.25521	6.58388	6.54085	6.51648
1300010M03RIK	5.78692	5.88192	5.5533	5.6835	5.63708	5.7702	5.7806	5.83671	5.80316
1300012D20RIK	5.62013	5.68735	5.77691	5.76811	5.68411	5.68229	5.64685	5.82178	5.67602
1300012G16RIK	6.0653	5.96665	5.83407	5.76769	5.59372	5.68173	5.67394	5.71445	5.65745
1300013B24RIK	6.92759	8.37943	8.94509	9.37379	9.08006	8.99788	7.70178	8.2377	6.73667
1300013D05RIK	7.44154	7.4528	7.64687	7.44496	7.54408	7.55572	7.17845	7.58982	7.16933
1300013D18RIK	5.9859	5.79266	6.02119	5.8756	5.85654	5.71402	5.86175	5.92306	5.77671
1300013J15RIK	5.65065	5.70171	5.65276	5.79178	5.80932	5.88851	5.85898	5.82869	5.76767
1300014I06RIK	5.81939	6.01941	6.2723	6.1363	5.97556	6.05856	6.31042	6.0151	5.83057
1300017J02RIK	5.63752	6.38836	5.64236	6.04121	6.1717	6.13517	5.45779	5.5862	5.42372
1300017K07RIK	6.79734	6.80238	6.81984	8.68362	8.61952	8.75353	7.84346	6.7	6.95278
1300018I05RIK	10.1987	10.3353	10.4339	10.3392	10.3669	10.3933	10.2968	10.3005	10.312
1300018J18RIK	7.44236	7.63903	7.43543	6.87857	6.90835	6.81752	6.96163	7.01745	7.04351
1300018L09RIK	5.69872	5.96672	5.77007	5.61233	5.95863	5.83868	5.88632	5.76811	5.60473
1300018P11RIK	9.82525	9.91912	9.81096	9.95927	9.79553	9.66624	9.59776	9.58626	9.56895
1500001A10RIK	5.47976	5.64571	5.86511	5.7294	5.72854	5.62453	5.749	5.75984	5.83658
1500001H12RIK	5.76253	5.99042	5.76906	5.76995	5.84699	5.82205	5.64033	5.45077	5.58857
1500001L15RIK	11.1677	10.7371	10.7675	11.2761	11.176	11.1464	10.5785	10.6956	10.5785
1500001M20RIK	8.02587	8.04305	7.92482	8.3922	8.56561	8.79811	8.67992	8.25125	8.49051
1500002B03RIK	5.80803	6.26827	5.96038	6.32813	6.32294	6.41092	5.86509	6.27976	5.74279
1500002I11RIK	8.44033	8.84997	8.43674	9.00284	9.0378	8.82546	8.88338	8.84099	8.61436
1500002O20RIK	6.05973	6.02139	5.75324	6.20897	6.2021	6.06297	5.97456	6.00391	5.60187
1500003D12RIK	10.1329	10.2121	9.539	10.6776	10.6735	10.7336	10.8899	10.5579	10.8378
1500003O03RIK	9.45247	8.92441	8.70313	9.57931	9.54208	9.36221	9.73821	9.7348	9.75522
1500003O22RIK	6.66055	6.46994	6.03325	7.60712	7.78373	7.61982	7.14204	7.1239	7.19318
1500004A08RIK	9.09238	9.50413	9.45454	8.07139	7.71577	7.71932	7.85507	9.5704	8.84402
1500005A01RIK	5.88929	5.75794	5.9303	6.33478	6.32152	6.40409	6.23415	6.58459	6.03109
1500005I02RIK	6.01945	5.78628	5.88341	5.82818	5.86296	5.85553	5.91736	5.62356	5.74418
1500009M05RIK	5.54511	5.70018	5.52166	5.69262	5.37578	5.42051	5.7009	5.63221	6.09733
1500010J02RIK	7.68542	8.0816	7.8381	7.70178	7.70381	7.66064	8.05744	7.73185	8.16396
1500010M16RIK	10.3839	9.88908	10.6584	12.7491	12.8608	12.7491	10.4072	10.1449	9.99159
1500011H22RIK	9.57392	9.77959	9.87121	9.82575	9.6671	9.41852	9.45454	9.60914	9.50324
1500011L16RIK	11.2858	10.6354	11.1823	10.5609	10.4053	10.6623	10.7304	10.7379	10.675
1500012F01RIK	10.9538	10.8874	10.7632	10.5885	10.8253	10.8922	10.9565	10.675	10.6623
1500015O10RIK	6.10959	5.54218	6.01191	5.65417	5.70387	5.72169	5.83787	5.55027	5.6888
1500016H10RIK	7.98535	7.79573	7.9219	7.8518	7.91041	7.85474	8.24303	7.82931	7.84068
1500019C06RIK	6.30209	6.42058	6.07311	6.94504	6.78976	6.74579	6.24351	6.54001	6.49556
1500019G21RIK	6.55182	6.6125	7.18164	6.75107	6.8376	6.80372	6.44907	6.73647	6.74826
1500026D16RIK	7.39831	6.95644	7.45626	7.05617	7.19868	6.99136	8.00701	7.54961	7.42274
1500031H04RIK	6.33328	6.43206	6.15733	6.65645	6.56098	6.74849	6.0573	6.34963	6.41477
1500031L02RIK	10.2307	10.2235	10.312	9.37295	9.53196	9.23373	9.58387	10.084	9.51192
1500031M22RIK	5.87147	5.75627	5.84671	5.43625	5.59749	5.71332	5.6768	5.84341	5.62798
1500032D16RIK	9.8348	9.65468	10.0228	10.2328	10.2824	10.3137	10.3794	10.1775	10.1775
1500032L24RIK	10.675	10.7217	11.3382	10.193	10.3068	10.1212	10.6409	10.4268	10.3414
1500034J20RIK	5.89146	5.8062	5.94931	6.10085	6.03362	6.12787	5.90567	6.19575	5.59146
1500035H01RIK	5.69183	6.1178	6.08219	5.68861	5.79738	5.90679	5.88819	5.95191	5.8942
1500040F11RIK	5.59998	6.23426	5.7923	5.64486	5.58473	5.59154	6.15158	5.98916	5.82917
1500041J02RIK	5.7897	6.11626	6.65989	6.01441	5.99027	5.9201	5.74004	6.25109	6.13387
1500041N16RIK	6.71411	6.35804	7.15655	7.5648	7.54004	7.52754	6.78503	7.29116	7.06684
1520401A03RIK	5.74951	5.85673	5.89045	5.86255	5.91716	5.89888	5.83383	5.77902	5.70353
1600002K03RIK	7.84636	7.62958	8.37035	7.52985	7.48646	7.52194	7.84473	7.6383	7.63903
1600002O04RIK	5.66052	5.73373	5.71376	5.73149	5.77689	5.91858	5.60764	5.66085	5.61448
1600012H06RIK	7.75286	7.39766	7.86246	7.77852	7.53949	7.66478	7.10911	7.60712	7.32629
1600012K10RIK	5.64108	5.6364	5.69084	5.72217	5.71465	5.54161	5.81807	6.16833	5.6806
1600013P15RIK	7.43231	7.78723	7.41686	10.1476	9.88511	9.91471	8.09285	7.78526	7.74067
1600014C10RIK	6.53855	6.15613	6.82922	6.29679	6.20454	6.21282	6.1253	6.46827	6.79256
1600015H20RIK	5.87614	5.86656	5.61822	5.98009	5.91561	5.84539	5.55805	5.55336	5.78963
1600015I10RIK	5.45294	5.55738	5.27056	5.35893	5.60154	5.41986	5.40694	5.62827	5.70188
1600016N20RIK	5.86681	6.2037	6.50466	6.23449	6.17973	6.13929	5.73927	6.00762	6.13095
1600019D15RIK	9.71279	9.7635	10.1279	9.06336	9.13292	9.13292	9.20204	9.67374	9.18853
1600020H07RIK	6.06303	5.96207	5.65526	5.90229	5.95375	5.92897	5.81571	5.93775	5.87975
1600021C16RIK	7.64951	7.96391	7.67638	7.63972	7.66105	7.64052	7.52921	7.95752	7.63335
1600022A19RIK	5.82888	5.78509	5.88192	5.85989	5.79756	5.79919	5.82638	5.8432	5.76555
1600023A02RIK	5.87327	5.67447	5.92266	5.8255	5.8559	5.78864	5.68854	5.96049	5.53353
1600025D17RIK	6.50352	5.84755	6.33462	6.27043	6.55182	6.41713	6.15231	6.13419	6.19609
1600027N09RIK	6.03646	6.37739	6.59459	6.59627	6.80137	6.63144	6.0527	6.38672	6.59459
1600029D21RIK	5.62394	5.6315	5.91313	5.69946	5.70932	5.71589	5.69014	5.80392	5.69717
1700001A24RIK	10.0584	9.50324	9.54374	8.84214	9.34958	8.8011	9.69852	9.32359	9.63736
1700001C02RIK	6.00457	5.89474	5.68872	5.69821	5.66415	5.7543	5.70569	5.56364	5.66122
1700001C14RIK	8.02253	7.79884	8.14553	7.83916	7.71932	7.75025	8.01543	7.861	7.96863
1700001C19RIK	5.83671	5.66536	5.82678	5.76702	5.68123	5.64753	5.75531	5.77075	5.70746
1700001E04RIK	5.52717	5.62938	5.62349	5.68672	5.77577	5.79722	5.95937	5.85944	5.88111
1700001F09RIK	5.87499	5.99429	5.50054	5.94207	5.98851	5.90251	6.3018	6.2021	5.81703
1700001F22RIK	5.92932	5.78558	6.05594	5.86047	5.82951	5.92717	6.04777	5.66867	5.84826
1700001J03RIK	5.73653	5.7658	6.07001	5.86746	5.77736	5.63322	5.74857	6.18354	5.7336
1700001L23RIK	5.77055	5.95772	6.14908	5.77363	5.944	5.86915	5.93209	5.84294	5.78692
1700001O22RIK	5.7903	6.11933	5.98795	5.96336	5.90124	5.79292	5.80297	5.82865	5.59235
1700001P01RIK	5.87017	5.81839	5.70838	5.88758	5.92545	5.76702	5.95922	5.939	5.83562
1700003E24RIK	5.65617	5.53138	5.79163	5.8336	5.73525	5.76206	5.73616	5.87812	5.72522
1700003F12RIK	6.03719	6.03256	6.20773	6.02825	5.89558	6.01221	5.68006	5.64961	5.55486
1700003M02RIK	5.85204	5.94594	5.64244	5.64848	5.78013	5.75562	5.83329	5.71144	5.76099
1700006C19RIK	5.59975	5.42804	5.73587	5.74136	5.73344	5.76413	5.70181	5.55121	5.5427
1700006D24RIK	6.51746	6.6175	7.06766	6.0156	6.05542	6.00821	6.22332	6.49302	6.16973
1700006H02RIK	5.99194	5.97744	6.13217	5.61931	5.69956	5.85817	5.74491	5.81703	5.75913
1700007G11RIK	5.63128	5.51529	5.53933	5.61369	5.79616	5.48786	5.61579	5.66826	6.0781
1700007I06RIK	5.80392	6.15829	5.83253	5.83927	5.87929	5.9	5.76645	6.16351	6.02792
1700007J06RIK	6.178	5.83962	5.67823	5.76522	5.69703	5.80867	5.93199	5.90009	5.78514
1700007K09RIK	5.94188	6.08259	5.76019	5.91966	5.75691	5.87361	5.7179	5.97627	5.76716
1700007N18RIK	5.66164	5.5838	5.64138	5.97928	5.82161	5.91667	5.45104	5.65801	5.61866
1700008F21RIK	5.41617	5.57724	5.75199	5.68106	5.47791	5.46784	5.60705	5.87768	5.93908
1700008I05RIK	5.68768	5.73096	5.91836	5.93527	5.97002	6.01975	5.99184	5.88486	6.00438
1700008P20RIK	5.81821	5.84813	5.77819	5.98387	5.75953	5.82057	6.03719	5.7736	6.01532
1700009P13RIK	6.87224	6.4587	6.52869	5.91546	5.93088	5.93082	6.51478	6.14833	6.18991
1700009P17RIK	5.6739	5.86566	5.61621	5.64681	5.67088	5.69429	5.77258	6.00005	5.97869
1700010A17RIK	5.76976	5.80867	5.80731	5.66542	5.71755	5.61126	5.80751	5.82843	5.71795
1700010D01RIK	6.00582	5.95761	5.72302	5.80669	5.694	5.81303	5.82704	6.04141	6.06371
1700010I14RIK	5.64084	5.5182	5.62891	5.66883	5.64096	5.63646	5.99442	5.79531	5.75608
1700010M22RIK	5.69318	5.69014	5.59839	5.65628	5.72093	5.58429	5.73888	5.70997	5.80803
1700011A15RIK	5.68196	5.57068	5.76152	5.54367	5.45164	5.5901	5.68072	5.80564	5.74769
1700011C14RIK	5.72039	5.64955	5.81508	5.83892	5.87817	5.83883	5.80869	5.81978	5.84694
1700011F03RIK	5.71002	5.48172	5.72224	6.06103	5.85208	5.96933	5.73023	6.01872	5.94632
1700011F14RIK	5.90757	5.66191	5.97713	5.65541	5.56085	5.68335	5.81692	5.63893	5.79524
1700011H14RIK	5.91821	5.59079	5.83312	5.69033	5.63633	5.56371	5.82192	5.90793	5.72055
1700011I11RIK	6.84062	7.13517	6.78855	7.28735	7.09156	7.16861	7.06684	7.29001	7.29657
1700011J18RIK	5.80509	5.76649	5.797	5.77553	5.53212	5.52082	5.73717	5.69233	5.60812
1700011K15RIK	5.62691	5.71052	5.62975	5.6541	5.75599	5.7366	5.75225	5.682	5.94891
1700012A03RIK	5.33505	5.50517	5.43249	5.69329	5.66323	5.74896	5.8129	5.89919	5.90719
1700012A16RIK	5.83294	5.89427	5.78941	5.71352	5.85101	5.9149	6.06872	6.02667	6.3365
1700012B09RIK	5.69511	5.84903	5.81245	6.0542	6.04495	6.01144	6.0774	5.83397	5.93852
1700012B18RIK	5.84149	5.9207	5.8046	6.73454	6.86602	6.94426	5.94061	5.69692	5.79697
1700012G19RIK	10.8695	10.7741	11.0139	10.345	10.5947	10.6267	11.274	10.8253	10.885
1700012H05RIK	5.54052	5.44938	5.59858	5.50652	5.54376	5.39331	5.72289	5.77197	5.90501
1700012H17RIK	6.73203	6.00653	5.96191	6.22266	6.19363	6.44098	7.22649	6.36078	6.51746
1700012L04RIK	5.61691	5.62849	5.71302	5.89628	5.71758	5.82244	5.686	5.51917	5.82405
1700013B16RIK	5.81713	5.56203	5.78447	5.64695	5.84591	5.93025	5.62561	5.6954	5.64595
1700013G24RIK	5.78158	5.5914	5.8386	5.92499	5.83421	5.90165	5.94558	5.81438	5.94229
1700013H19RIK	6.65679	6.16394	7.03331	6.57617	6.90638	6.98987	7.05617	6.83642	6.67448
1700013L23RIK	7.01899	7.07935	7.33122	6.34698	6.31888	6.30805	6.37843	6.55657	6.29978
1700013N18RIK	5.77951	5.8297	5.84189	5.97791	5.88447	5.94163	5.81378	5.77207	5.77696
1700014P03RIK	6.1902	6.19059	5.92684	6.10171	6.14985	6.20509	6.3118	6.35704	6.02379
1700015E13RIK	5.90951	5.9829	5.65417	6.09782	6.06831	6.15045	5.82047	5.5741	5.74679
1700016C15RIK	5.624	5.73063	5.79573	6.06297	6.13095	6.15207	6.13871	5.84747	5.76354
1700016D06RIK	5.85454	5.89804	6.02958	5.88905	5.91005	5.90507	5.70895	5.65014	5.67114
1700016F23RIK	5.72653	5.73995	5.75819	6.04814	6.01941	5.95633	5.73442	5.65654	5.94674
1700016G05RIK	5.73033	5.82951	5.74509	5.82265	5.86538	5.76775	5.80247	5.60732	5.71013
1700017B05RIK	5.9655	5.59621	5.85995	5.76014	5.67621	5.66211	5.65673	5.56397	5.50421
1700017D11RIK	6.03109	6.28844	6.07729	6.23282	6.19505	6.13445	5.84139	6.0746	5.95385
1700017I11RIK	5.9448	5.75519	5.9207	5.8235	5.84621	5.84385	5.65569	5.90857	5.87476
1700017N19RIK	6.06684	5.97185	5.71698	6.15129	6.03282	6.06303	6.07141	6.03128	6.14626
1700018B24RIK	5.6805	5.75186	5.66772	5.61585	5.4954	5.71755	5.74621	5.77249	5.7243
1700018C11RIK	5.54321	5.72337	5.72609	6.15144	6.12093	6.19341	6.06544	5.9939	5.85587
1700018F24RIK	5.65327	5.6895	5.88945	5.90309	6.02602	5.8971	5.80092	5.87607	5.7406
1700018O18RIK	5.1321	5.39556	5.40985	5.61319	5.78349	5.96371	5.6701	5.85391	5.59372
1700019B16RIK	5.556	5.83917	5.55895	5.83127	5.76789	5.80949	5.67508	6.0765	5.86985
1700019D03RIK	5.78731	5.49801	6.11107	5.74599	5.80848	5.54638	5.77767	5.66542	5.55068
1700019E19RIK	5.67629	5.64439	5.79749	6.06831	5.92644	5.91375	5.82033	6.06341	5.75719
1700019F09RIK	5.90674	5.79839	5.59263	5.70552	5.63262	5.6334	5.67531	5.80848	5.58429
1700019G17RIK	5.8999	5.98868	5.85623	5.9386	5.96459	6.05674	5.93535	5.97153	5.86418
1700019H03RIK	5.57733	5.80761	5.87162	6.05258	5.87249	5.93448	5.74241	6.07302	5.803
1700019I23RIK	6.19653	5.83485	5.91762	5.81341	5.89369	5.76779	5.67605	5.74464	5.79198
1700019L03RIK	5.8337	6.02606	5.5852	6.11967	6.11555	6.15679	6.58092	6.05458	5.88819
1700019M22RIK	5.84167	6.06303	6.05663	5.7946	5.84004	5.80098	5.8013	5.92905	5.82869
1700019N19RIK	5.53072	5.57346	5.64855	5.45104	5.68347	5.56203	5.94119	5.73805	5.61226
1700019P01RIK	5.58847	5.7855	5.512	5.87674	5.85905	5.87221	5.77507	6.01774	5.90383
1700020B09RIK	5.71419	5.79735	5.82727	5.91637	5.86497	5.89131	6.02515	6.07585	5.88619
1700020C08RIK	5.81709	5.6447	5.8493	5.68829	5.65696	5.57593	5.76472	5.7568	5.78618
1700020C11RIK	6.28098	6.24148	6.35553	6.03887	6.07702	5.88976	6.22883	5.89799	6.1997
1700020D05RIK	7.0052	6.64732	7.31405	6.45722	6.44801	6.39538	5.99027	6.63606	6.98728
1700020H15	6.01494	5.73899	6.00639	5.75456	5.71009	5.58981	5.30775	5.87275	5.51122
1700020L24RIK	5.77072	5.803	5.69753	5.9909	5.62807	5.73395	5.63368	5.64624	5.63354
1700020N01RIK	5.65958	5.91464	5.5976	5.72169	5.73809	5.80584	5.73006	5.43559	5.91807
1700020O03RIK	6.676	6.53177	6.49556	6.67226	6.48674	6.64429	7.01161	6.72678	6.78814
1700021C14RIK	7.52754	7.28395	7.65976	7.43166	7.48739	7.5699	7.32652	7.35169	7.24821
1700021E15RIK	6.10219	6.4696	5.59432	6.11119	6.16195	6.27987	5.93987	5.79183	5.99212
1700021F05RIK	8.36177	8.42619	8.73498	9.03143	8.72217	8.76017	8.83611	8.74916	8.92491
1700021K02RIK	5.68633	5.84248	5.91724	5.82345	5.80382	5.80878	5.84881	6.058	6.04883
1700021K19RIK	7.8381	7.64269	7.61739	6.82602	7.04533	6.9903	7.18844	7.32979	7.45744
1700022C21RIK	6.57147	6.2803	6.12828	6.32497	6.33386	6.28648	6.64077	6.35406	6.57894
1700022N24RIK	7.10867	6.93259	7.13818	6.86685	6.78379	6.80169	7.43374	7.09156	7.19602
1700023B02RIK	8.49801	8.53666	8.30568	8.30285	8.05355	8.15877	8.29207	8.21525	8.16283
1700023E05RIK	5.88101	5.70942	5.83898	5.83152	5.88608	5.85514	5.74863	5.73648	5.7107
1700023I07RIK	5.73833	5.72944	5.74234	5.79916	5.80878	5.76055	5.75485	5.86011	5.95463
1700023M03RIK	6.33228	7.16575	6.81217	6.26139	6.51774	6.28744	6.51272	6.22483	6.48371
1700023M09RIK	9.76741	9.75699	10.1161	10.9354	10.8123	10.8378	10.1178	10.4339	10.2515
1700023O11RIK	7.43788	7.20259	6.8982	7.65484	7.89197	7.97137	7.68542	7.73247	7.60234
1700024C24RIK	5.6858	6.38475	5.74669	6.47669	6.15315	6.37677	6.30156	5.98612	6.15207
1700024D23RIK	5.41481	5.94553	5.61873	5.90851	5.87305	5.78876	6.06476	5.76061	5.76532
1700024G13RIK	5.85647	5.96126	5.82503	6.04515	6.00904	5.94301	5.96693	5.57385	5.6016
1700024K14RIK	6.12939	5.81082	5.82276	5.7448	5.55758	5.67634	5.59161	5.70834	5.4195
1700025B16RIK	6.50253	7.00437	6.27092	6.41649	6.63009	6.62381	6.35307	6.2954	6.73225
1700025D03RIK	6.17395	6.15218	5.81087	5.7406	5.59894	5.76052	5.88574	5.83423	5.64778
1700025E21RIK	6.17632	5.82224	5.71111	5.78314	5.85271	5.78462	5.834	6.03185	5.88199
1700025F22RIK	5.75958	5.79403	5.93648	5.79103	5.80003	5.70181	5.90128	5.72761	5.86484
1700025G04RIK	7.6152	7.76264	7.7096	6.75772	6.73203	6.56661	7.37609	7.69882	7.61848
1700025J14RIK	6.50484	6.46295	6.89085	6.27262	6.28708	6.26139	6.43523	6.66305	6.45766
1700025K23RIK	5.74206	5.86103	5.74938	6.3588	6.48812	6.6582	5.87992	6.20549	6.14202
1700026D08RIK	5.96989	5.57014	5.89841	5.45514	5.67142	5.39556	5.51083	5.51758	5.57337
1700026L06RIK	5.7046	5.53654	5.70509	5.73829	5.67278	5.78734	5.71876	5.52434	5.55479
1700026P10RIK	5.97097	5.88704	6.16675	5.82327	5.94188	5.91943	6.05158	5.71325	5.85647
1700027A23RIK	5.85188	5.84215	6.11025	5.79359	5.7566	5.77185	5.89834	5.57462	5.72028
1700027D21RIK	5.83217	5.92557	5.72446	5.68973	5.87033	5.71906	5.66236	5.92636	5.67502
1700027J05RIK	8.18928	8.28992	8.32082	7.51054	7.44972	7.3626	6.78913	7.84531	7.79977
1700027M21RIK	5.47543	5.45294	5.75667	5.64647	5.76161	5.6453	5.55195	5.61931	5.75939
1700027N10RIK	5.67025	5.83033	5.63553	5.8357	5.91393	5.75207	6.46221	6.46363	6.14494
1700028K03RIK	5.84576	5.94645	5.7129	5.7417	5.7329	5.72425	5.74913	5.78429	5.82779
1700028N11RIK	5.23929	5.76488	5.35175	5.66348	5.61415	6.45156	5.87725	5.37438	5.73854
1700028O09RIK	5.90447	5.79379	5.79058	6.01994	5.98129	5.86909	6.04157	5.50409	5.77142
1700028P14RIK	6.02994	5.8665	5.82601	5.83169	5.93144	5.80179	5.91401	5.84469	5.78326
1700029F12RIK	5.52852	5.57597	5.65576	5.6087	5.64803	5.76599	5.90173	5.80857	5.77767
1700029G01RIK	6.13145	6.30103	6.46753	5.93789	6.02553	5.88336	5.76297	6.00697	6.04998
1700029H01RIK	5.69824	5.90345	5.89301	5.74582	5.75755	5.72986	5.66661	5.71523	5.80599
1700029H14RIK	5.76849	5.89369	5.75119	5.7897	5.70149	5.6952	5.82237	5.74721	5.77339
1700029I01RIK	5.71427	5.79924	5.48868	5.67966	6.00077	6.0116	5.75544	5.65343	5.85942
1700029I08RIK	6.16973	6.02876	5.61097	6.19448	6.03779	6.12274	6.16881	6.05158	6.12
1700029I15RIK	5.96388	5.74496	5.91452	6.10944	5.90813	6.01017	6.03581	6.62897	6.26946
1700029J07RIK	5.80463	5.75939	5.88761	5.92897	6.09929	5.96872	6.05716	6.00502	5.77378
1700029P11RIK	7.2088	6.83878	7.28425	7.27477	7.39389	7.17989	7.82665	7.35367	7.54408
1700030B17RIK	5.96599	6.12787	5.96922	6.33416	6.20145	6.10892	6.2119	5.96529	6.22253
1700030E05RIK	6.23426	6.46788	6.37525	5.94704	5.88101	5.96156	5.82974	6.08349	6.087
1700030J22RIK	5.88017	6.28164	6.52146	6.00277	6.03816	5.95076	6.12032	6.24566	6.29852
1700030K01RIK	6.17956	6.07093	6.18149	5.75186	5.8979	5.93939	5.70871	5.88866	5.88123
1700030K09RIK	6.98141	7.26221	7.25018	7.10138	7.20585	7.2235	7.04568	6.97259	7.48061
1700034E13RIK	5.61503	5.81103	5.63742	5.66435	5.71045	5.72566	5.56801	5.78957	5.92277
1700034H14RIK	8.83472	9.10922	9.1071	8.45956	8.43771	8.34356	8.76246	8.76843	8.82592
1700034I23RIK	5.96172	5.83014	5.88307	5.8706	5.95272	5.81792	5.99218	5.86859	5.94982
1700034J06RIK	5.62967	5.63117	5.65479	5.62063	5.69742	5.62225	5.66973	5.63453	5.62007
1700034K16RIK	6.05505	5.98317	6.57748	6.00487	5.96593	6.05108	6.19098	5.74389	6.00264
1700034O15RIK	5.76605	5.93129	5.8653	5.79592	5.83966	5.85345	5.8693	5.97797	5.93607
1700036D21RIK	5.72757	5.77969	6.21638	5.88377	5.90469	5.77048	5.75282	5.85185	6.0584
1700037C18RIK	6.07248	6.17375	6.02331	6.01788	6.09605	6.02825	6.11352	6.13728	6.4739
1700037H04RIK	9.45454	9.48025	9.19019	9.64707	9.61267	9.64156	9.95157	9.62262	9.78455
1700039E15RIK	5.81199	5.96799	5.88418	5.93648	5.90832	5.72366	6.16138	5.87646	6.12805
1700040I03RIK	7.02932	6.71208	6.64605	6.70293	6.85815	7.01296	6.86094	6.70265	7.07086
1700040L02RIK	5.66184	5.8917	5.67543	5.90789	5.87966	5.88758	5.86011	5.68845	5.80612
1700045I19RIK	6.02695	5.96364	5.9383	5.96319	6.01518	6.09122	5.96599	5.96002	5.84013
1700047E16RIK	6.62843	6.45326	6.74073	6.27573	6.25035	6.22922	6.33396	6.39799	6.31198
1700047I17RIK	8.90947	8.91481	8.86452	8.58099	8.67837	8.55734	8.79124	8.96738	8.89774
1700048E23RIK	9.02926	9.01862	9.12058	8.7794	8.78524	9.03603	9.11843	9.02926	8.95996
1700049E17RIK	5.92347	5.87942	5.85843	5.78596	5.80101	5.93824	5.87762	6.35205	5.89034
1700049G17RIK	6.15839	5.63506	5.86057	5.82436	5.78083	5.90095	5.71352	5.80242	5.92366
1700049K14RIK	5.88841	5.79932	5.79567	5.73548	5.62617	5.70339	5.77202	6.05764	5.61339
1700049L16RIK	5.73019	5.68406	5.92186	5.75892	5.81229	5.87848	5.67536	5.75464	5.71822
1700051E09RIK	6.08039	6.37099	5.98851	5.91945	5.98465	5.94506	5.92884	5.89087	6.08979
1700052H20RIK	5.60862	5.6915	5.63614	5.44889	5.64129	5.39747	5.75995	5.85476	5.72622
1700052N19RIK	8.7794	8.83946	8.9625	8.08979	8.20407	8.16343	8.62637	8.57277	8.5186
1700054O13RIK	5.57578	5.61151	5.74292	5.39985	5.37304	5.43711	5.69848	5.41708	5.62598
1700055M20RIK	5.80919	5.64196	5.64064	5.70602	5.7169	5.739	5.85218	5.92927	5.63893
1700055N04RIK	5.65576	5.81306	5.90999	5.68465	5.72039	5.76995	5.64474	5.89058	5.84058
1700055O19RIK	8.821	8.55259	8.57368	8.72539	8.46119	8.3324	9.10474	8.55489	8.58859
1700057G04RIK	6.04883	5.90054	5.91134	5.70658	5.88454	5.72279	6.16241	5.85729	6.07934
1700057K13RIK	5.64037	5.47651	5.44889	5.97603	5.81194	5.74965	5.8275	5.93082	5.79715
1700058C01RIK	5.88437	5.80747	5.63019	5.76547	5.80448	5.82198	5.73966	5.58015	5.35522
1700058C13RIK	5.72725	5.62029	5.46418	5.55145	5.57909	5.4915	5.399	5.64338	5.50277
1700060E18RIK	5.71168	5.90816	5.8944	5.80404	5.65916	5.69318	5.8398	5.48333	5.62287
1700060H10RIK	6.51053	6.23172	6.5729	6.50628	6.18961	6.53775	6.73988	6.36048	6.46276
1700061G19RIK	5.67324	5.52502	5.77573	5.7634	5.60263	5.65456	5.44526	5.50364	5.46109
1700063I17RIK	5.77242	5.4088	5.5404	5.72731	5.60964	5.69976	5.61621	5.69246	5.60755
1700064K09RIK	8.39511	8.61033	8.38272	8.48534	8.31184	8.38999	8.28056	8.46548	8.32663
1700065D16RIK	5.71734	5.74742	5.81201	5.68604	5.70287	5.66625	5.69707	6.04923	5.80297
1700065I17RIK	6.07335	5.90857	5.90741	5.70108	5.82688	5.75498	5.65295	5.81348	6.00114
1700065O13RIK	7.28585	7.19602	7.47887	6.60051	6.60312	6.55274	7.4068	7.13362	7.25822
1700067C01RIK	5.72123	5.46922	5.47358	5.33178	5.43448	5.41036	5.62705	5.70064	5.71105
1700067K01RIK	6.19469	5.91773	6.01747	5.99909	5.99118	5.99424	5.78955	6.05915	5.93392
1700067P10RIK	6.00352	5.89753	5.78214	5.88079	5.94415	5.79477	5.9039	5.50673	6.19111
1700069O15RIK	6.98234	6.82719	6.99966	6.98141	6.94467	6.96918	7.1558	7.02381	6.97824
1700071E18RIK	5.78876	5.85318	5.73251	5.71577	5.57996	5.53097	5.74572	5.76343	5.66258
1700071K01RIK	6.66145	6.70485	6.21031	6.97888	7.26098	7.40444	7.23983	7.25587	7.06037
1700072E05RIK	6.05706	6.00038	5.76385	5.72009	5.66872	5.76796	5.52852	5.7122	5.67789
1700073E17RIK	5.45134	5.45925	5.41125	5.47563	5.42343	5.50409	5.75082	5.65304	5.73793
1700073K01RIK	5.75401	5.70727	5.73346	5.78934	5.77819	5.68652	5.7954	5.89083	5.93047
1700074P13RIK	5.98606	5.79711	5.77371	5.58156	5.53237	5.63439	5.52717	5.57346	5.4637
1700080E11RIK	6.0746	6.03156	5.88131	5.75316	5.94977	5.83421	5.85513	5.76253	5.74982
1700081D17RIK	5.81325	6.01725	5.96268	5.64658	5.77088	5.74774	5.64769	5.75505	5.75013
1700083M11RIK	5.57474	5.59315	5.81553	5.80848	5.81684	5.7815	5.72131	5.80702	5.94107
1700084C01RIK	6.09327	6.08631	6.24736	5.89322	5.9366	5.82765	5.81189	5.60263	5.99673
1700084J12RIK	5.71721	5.88057	5.88236	5.61359	5.4137	5.45953	5.76767	5.73218	5.56683
1700084J23RIK	5.79189	5.92654	5.87254	5.72143	5.80799	5.59405	5.59875	5.54587	5.56673
1700088E04RIK	6.02962	5.936	6.07104	5.80945	5.99272	5.83887	6.09504	6.26446	5.90229
1700091F14RIK	5.83318	5.61954	5.86681	5.89067	5.774	5.73563	5.62307	5.65356	5.56217
1700093E07RIK	5.99325	5.76874	6.38715	6.78855	6.24071	6.20847	6.54219	5.82337	6.08136
1700093K21RIK	5.38559	5.54919	5.48663	5.74333	5.65304	5.54894	5.57616	5.54726	5.55683
1700094C09RIK	5.94027	5.99848	5.83069	6.08158	6.02128	6.02139	6.28999	6.09517	5.71447
1700094E07RIK	5.62149	5.71243	5.66497	5.72079	5.73793	5.53581	5.99776	5.85616	5.54218
1700095H12	5.93631	6.02825	5.92228	6.06839	6.21832	6.18253	5.99725	6.10038	6.1656
1700095K08RIK	5.83152	5.78421	5.7522	5.904	6.01092	5.94324	5.55345	5.73316	5.60597
1700095N21RIK	9.46185	9.45058	9.22531	8.84528	8.68515	8.98397	9.71279	9.18055	9.28241
1700102P08RIK	6.56694	6.91482	6.98234	6.26399	6.30982	6.26502	6.01189	7.07086	6.16469
1700108E19RIK	5.79178	5.8809	5.70387	5.77896	5.73118	5.69655	5.73851	5.66226	5.68619
1700108L22RIK	6.3018	6.08966	5.80219	6.26946	6.35097	6.30209	6.75107	6.43349	6.33851
1700108M19RIK	5.84497	6.05929	5.62949	5.85784	5.65913	5.75417	5.58326	5.65496	5.48199
1700109H08RIK	5.95657	6.16847	6.039	6.26015	6.34554	6.30736	5.90617	5.80588	6.00138
1700111A04RIK	5.54638	5.6797	5.59667	5.52153	5.59088	5.53597	5.69997	5.72382	5.73421
1700111I05RIK	5.78596	5.86065	5.62787	5.76724	5.8063	5.76789	5.81019	5.777	5.63577
1700112C13RIK	5.56961	5.49708	5.68246	5.52517	5.61857	5.65085	5.84805	5.47826	5.6688
1700112P19RIK	5.47927	5.71257	5.40156	6.24612	6.0746	5.99449	6.23219	6.3732	5.82685
1700113I22RIK	5.64764	5.80527	5.82872	5.75979	5.81621	5.85332	5.79089	5.91464	5.96947
1700113O17RIK	6.00289	6.22161	6.50593	5.93482	6.00589	5.9281	6.14863	5.96676	6.28648
1700120B06RIK	6.03379	5.92884	5.7955	5.88379	5.97024	5.8398	6.39402	6.12641	6.09821
1700123D08RIK	6.42197	6.44832	6.5878	6.48799	6.33851	6.25035	6.14556	6.43293	6.24585
1700123K08RIK	5.65031	5.74612	5.91321	5.62102	5.67337	5.64284	5.55251	5.74765	5.76706
1700123L14RIK	5.8523	6.18459	5.69677	5.89972	5.83423	5.99106	5.93386	5.85165	5.74654
1700123O20RIK	9.15904	8.62916	9.28241	8.91481	8.7424	8.88764	9.42369	9.16792	8.70098
1700127D06RIK	5.88835	5.68712	5.93334	5.73096	5.7565	5.81781	6.05214	5.66592	5.65406
1700127F16RIK	6.0222	5.79412	6.17863	5.7592	5.90789	5.85101	6.39105	5.86516	6.01378
1700128F08RIK	5.85916	5.98861	5.74396	5.88108	5.904	5.80015	6.14046	5.84047	5.86656
1700129C05RIK	5.75902	5.95231	5.8629	5.9409	5.87113	5.8786	6.07195	6.01051	5.75464
1700129I15RIK	5.81888	5.53443	5.74851	5.77318	5.497	5.69745	5.59154	5.74251	5.76084
1700129L13RIK	6.94083	7.24045	6.92119	7.78053	7.50825	7.48772	7.12546	7.4249	7.19793
1810003N24RIK	7.84428	8.01042	8.05986	8.65298	8.93596	9.213	7.68521	7.83336	7.68313
1810007E14RIK	5.65913	5.72348	5.71472	5.32163	5.38371	5.62118	5.495	5.83057	5.79466
1810007M14RIK	6.69067	6.63009	7.19829	6.31663	6.33358	6.3196	6.16452	6.74353	6.54314
1810007P19RIK	5.87644	5.8322	6.02667	5.71971	5.84964	5.83106	6.04725	6.02843	5.94965
1810008A14RIK	6.98822	6.7461	6.82719	6.95644	7.18138	6.96731	7.14475	6.66371	6.7431
1810008A18RIK	8.48318	8.18656	8.37943	8.20675	8.18094	8.18094	8.20879	8.38721	8.37457
1810008K03RIK	5.91074	5.8325	5.54548	5.64986	5.65907	5.70009	5.72393	5.85559	5.70292
1810008K16RIK	5.66211	6.00388	5.92759	5.53006	5.60498	5.71747	5.8792	5.6646	5.57909
1810008O21RIK	8.29115	7.8058	7.5052	9.15537	9.18938	9.05954	8.92845	8.40261	8.43497
1810009A15RIK	7.7698	7.38226	7.2685	8.22709	8.15325	8.223	8.15877	7.80607	8.18537
1810009B06RIK	6.40792	6.45376	6.36374	6.33161	6.40951	6.24736	6.72885	6.56766	6.40629
1810009H17RIK	6.57319	6.53463	6.58684	6.24342	6.29937	6.17758	6.60364	6.29586	6.43685
1810009J06RIK	5.94982	6.22468	5.74857	5.77947	5.72638	5.90621	5.78026	5.84787	5.87835
1810009K13RIK	6.28314	6.45647	6.31341	6.39903	6.71509	6.71093	6.63919	6.26452	6.29223
1810009M01RIK	7.21558	7.3486	7.5977	6.84277	6.52063	6.69013	6.47509	7.85623	7.18571
1810009N02RIK	9.3002	8.66963	8.6067	8.31627	8.68587	8.57025	9.24569	9.33926	9.2868
1810009O10RIK	8.33386	8.09463	7.86607	8.05228	7.87071	7.99516	8.11971	7.72457	7.99816
1810010M01RIK	5.5741	5.50364	5.50074	6.25651	6.03371	6.19434	5.81097	5.76782	5.89378
1810010N17RIK	8.50651	8.44268	8.47293	8.12664	8.1888	8.03473	8.75353	8.57308	8.58193
1810010O14RIK	5.59109	5.45242	5.80395	5.51174	5.46967	5.57462	5.79017	5.77229	5.55145
1810011K17RIK	6.10194	6.08114	5.88909	5.84884	5.89008	5.89237	5.71895	5.68419	6.1178
1810011O10RIK	5.81548	5.76815	5.61448	5.68666	5.70029	5.62029	5.82084	5.98842	5.75528
1810011O16RIK	7.00919	6.5908	6.46144	8.28723	8.3557	8.07202	8.01042	7.33067	7.79459
1810012H11RIK	6.56409	6.67213	6.26755	6.2363	6.30251	6.22056	6.13466	6.01905	5.70029
1810013C15RIK	7.24454	7.10528	6.7983	7.71932	7.69721	7.66105	7.47199	7.72925	7.38226
1810014F10RIK	7.49533	7.61204	7.3573	7.58235	7.85507	7.76363	7.58827	7.55771	7.76938
1810014L12RIK	6.61054	6.853	7.22744	6.65162	7.33653	7.25481	7.93292	6.80169	7.1026
1810015A11RIK	6.10171	5.96459	5.74304	6.50792	6.63919	6.87577	6.57782	6.10125	6.1384
1810015C04RIK	7.61848	7.92455	8.14167	10.3491	10.4422	10.3404	8.08979	7.33712	7.91527
1810015M01RIK	8.77015	8.87113	8.5201	8.37753	8.51472	8.3882	9.36682	8.85412	9.02313
1810015P03RIK	5.40244	6.18169	5.60471	5.90628	5.99085	5.93144	5.50221	5.20084	5.63417
1810017G16RIK	9.63201	9.41214	9.64573	9.27841	9.3869	9.24312	9.70283	9.3603	9.47875
1810019J16RIK	5.66233	5.85174	5.72911	5.70052	5.73591	5.73482	5.66406	5.90975	5.88533
1810020C19RIK	9.40542	9.33059	9.54686	8.89214	9.27447	9.39076	9.34486	9.35098	9.72477
1810020D17RIK	7.93052	8.10571	8.23505	7.98535	8.22605	8.43047	8.07094	8.37457	8.03789
1810020G14RIK	5.98683	6.01711	5.85791	5.75928	5.79253	5.81978	5.65488	5.57123	5.75867
1810021J13RIK	6.88799	7.02064	6.77084	7.35308	7.28585	7.27477	7.08417	7.21217	7.34753
1810022C23RIK	6.30672	6.2119	6.0206	6.09487	6.11037	6.19098	5.96331	6.16085	5.95437
1810023F06RIK	5.66026	5.82302	5.77035	5.67675	5.68905	5.60597	5.7752	5.77845	5.69851
1810026J23RIK	8.46471	8.20629	7.6437	8.4174	8.42685	8.46668	8.3324	8.57368	8.42021
1810027O10RIK	10.0752	9.96216	10.1707	9.40989	9.80946	9.76043	10.1565	9.71619	10.0343
1810029B16RIK	5.71962	5.9155	5.74155	5.74403	5.62624	5.7852	5.71384	5.58529	5.68953
1810029G24RIK	9.08006	9.14405	8.40961	11.6645	11.3534	11.4883	9.74633	9.58241	9.63601
1810030J14RIK	5.81358	6.16814	5.75026	6.11138	5.94895	5.9567	5.85924	5.96459	5.72669
1810030N24RIK	9.25824	8.9786	9.09056	9.09938	9.14405	9.21708	9.52471	8.81858	9.0403
1810030O07RIK	5.91652	5.83306	5.87781	5.91507	5.9878	5.81298	6.23196	5.85761	6.14863
1810031K02RIK	10.6242	10.1647	10.3901	9.68174	9.52471	9.43928	10.0413	10.4034	10.2442
1810031K17RIK	5.94704	6.07022	6.16899	6.00719	5.93053	5.88164	5.69257	5.98943	5.65351
1810033A06RIK	6.44294	5.93531	6.2611	6.43127	6.60223	6.62417	6.46144	6.47176	6.26158
1810033M07RIK	6.24747	6.43127	6.65275	5.96468	5.94293	6.12227	5.69173	6.25994	5.91581
1810034K20RIK	5.83987	5.89407	5.68457	6.02571	5.85242	5.8782	5.5288	5.56433	5.66634
1810035L17RIK	8.56663	8.7678	8.21263	9.09409	9.45005	9.65791	9.44204	8.91679	8.83809
1810036H07RIK	5.96427	6.02379	6.09142	5.72427	5.66838	5.76274	5.86828	5.58225	5.64394
1810036I24RIK	5.72293	5.62267	6.08203	5.72313	5.93311	6.10685	5.70093	5.88569	6.17114
1810037B05RIK	5.96929	5.92852	5.74186	5.78485	5.73076	5.68679	6.41257	5.66493	6.17889
1810037C20RIK	8.3893	8.44407	8.08015	8.34631	8.3373	8.31073	8.36659	8.12871	8.42447
1810037G04RIK	6.88418	6.61904	6.81305	6.68114	6.63489	6.87946	7.24972	6.47991	6.73454
1810037K07RIK	5.50842	5.52637	5.51098	5.78411	5.7932	5.75459	5.49892	5.68758	5.63742
1810038H16RIK	8.87413	8.63397	8.93976	8.1888	8.07094	8.14707	8.28364	8.32023	8.26527
1810042K04RIK	8.07451	8.24101	8.67992	7.65759	7.79459	7.93984	8.61897	8.17432	8.19161
1810043G02RIK	6.14919	6.03741	6.12821	6.3574	6.24225	6.27694	5.90782	6.332	6.24868
1810043J12RIK	9.36571	9.48927	9.38024	8.37035	8.41011	8.30697	8.93275	9.13781	9.22531
1810043M15RIK	7.65549	7.64951	7.47995	7.41437	7.46357	7.57662	7.61265	7.57387	7.60135
1810044A24RIK	6.21955	6.2223	5.82939	6.56566	6.49932	6.51746	6.10944	6.38415	6.5202
1810044O22RIK	11.0995	11.1138	11.3108	10.2282	10.2121	10.16	10.5506	10.6124	10.7842
1810045J01RIK	6.99623	7.11662	7.33899	6.70387	6.63303	6.54987	6.73561	6.87905	6.83294
1810045K06RIK	7.5542	7.47544	7.65549	8.18094	8.29348	8.28227	7.32128	7.67418	7.49087
1810045K17RIK	5.94812	5.73566	6.06697	5.8513	5.87398	5.87364	5.72307	5.9318	5.65801
1810046I24RIK	5.66103	5.94755	5.78639	6.34389	6.12956	6.11225	6.03292	6.01592	5.8357
1810046J19RIK	11.2666	10.9269	11.3047	10.9779	11.2042	11.0481	11.082	10.9843	10.952
1810047C23RIK	7.53115	7.39077	7.43038	6.9302	7.30266	7.16224	7.54602	7.37561	7.26537
1810048J11RIK	6.69206	6.24362	6.67739	6.57708	6.34582	6.3858	5.90037	6.70639	6.10742
1810048P08RIK	5.92048	6.02331	5.7855	6.05723	6.02481	6.05471	5.92061	5.94852	5.83078
1810049H13RIK	7.2596	7.21825	7.41049	7.17794	7.05342	7.05285	7.18164	6.70567	6.99232
1810049H19RIK	5.44847	5.71427	5.52896	5.5838	5.72154	5.70871	5.90194	5.92355	5.73951
1810049K24RIK	5.7672	6.08739	5.96165	5.95681	5.98345	5.83291	5.72034	5.93743	5.9212
1810054G18RIK	6.44832	6.33555	5.83325	6.35323	6.23528	6.39759	6.37677	6.47258	6.4184
1810054O13RIK	6.92378	6.83	6.67226	6.3947	6.25547	6.39341	6.58416	6.50142	6.76268
1810055E12RIK	7.86957	7.93052	8.33611	7.71402	7.61573	7.57152	7.80872	7.92872	7.94838
1810055G02RIK	7.57387	7.54943	8.10221	6.94547	7.08961	7.00109	7.48488	7.41933	7.53254
1810057B09RIK	5.96371	5.77384	6.06447	5.97576	5.95183	5.96785	5.76047	5.68612	5.7125
1810057C19RIK	6.38499	5.94143	5.88753	5.84244	5.87848	5.95251	6.08831	5.98654	6.05542
1810057E01RIK	5.80797	6.0527	6.51144	5.94463	6.04725	5.98531	5.84887	5.86301	6.13852
1810057P16RIK	5.54183	5.87545	5.6871	5.54806	5.5404	5.36366	5.70036	5.95226	5.91802
1810059A23RIK	7.85507	7.70178	7.61901	7.66225	7.60087	7.68521	7.49087	7.49301	7.57061
1810059G22RIK	8.65996	8.78	8.67701	9.20936	8.87628	8.92289	8.70313	8.73605	8.821
1810060D16RIK	8.51034	8.50745	8.79124	8.35615	8.72539	8.75503	9.28594	8.65847	8.84099
1810060J02RIK	6.79461	6.72782	6.61488	6.39521	6.39172	6.58001	6.9158	6.42246	6.54649
1810063B05RIK	9.11097	9.21094	9.34486	9.77959	9.68674	9.69554	9.68057	9.33363	9.2802
1810063P04RIK	5.9504	6.01592	5.83975	5.55433	5.63348	5.66934	5.7435	5.79685	5.82486
1810064F22RIK	13.835	13.835	13.433	14.1601	14.1936	14.1936	13.4971	14.2904	14.0642
1810065E05RIK	5.84819	5.86135	5.90585	5.86301	5.72162	5.64236	5.8057	5.66114	5.84083
1810073E21RIK	7.18602	7.18164	7.52046	6.68439	6.79508	6.65708	7.01396	6.8986	6.77612
1810073G14RIK	9.68674	9.81892	10.255	9.34193	9.39901	9.50596	9.6671	9.50144	9.68057
1810073N04RIK	5.98174	6.19298	6.27071	6.04019	6.11485	6.11215	5.86599	6.61936	6.06428
1810073P09RIK	5.83951	5.83635	5.64975	5.9	5.98247	5.96878	6.0564	6.12624	5.94927
1810074P20RIK	7.12835	7.29329	7.36105	7.06477	7.0103	6.98728	6.91132	7.00231	7.3256
2010001H14RIK	5.61145	5.84711	5.90187	5.44797	5.59336	5.55701	5.71997	5.6409	5.57896
2010001J22RIK	6.90052	7.03331	7.20288	6.13802	6.24822	6.0292	6.09646	7.03928	7.26356
2010001M09RIK	6.40497	6.78579	7.3869	6.93239	6.51478	6.9215	6.71124	6.6416	7.2975
2010001O09RIK	8.15108	7.98451	7.91929	8.28653	8.43579	8.48138	8.36327	8.02253	8.12664
2010002A20RIK	5.77003	5.89273	5.7244	5.82399	5.77235	5.87663	5.79903	5.93258	6.24392
2010002N04RIK	6.91815	6.71043	6.59485	6.90813	6.61451	6.6679	6.68532	7.06662	6.61383
2010003J03RIK	8.72994	8.71759	9.13027	7.89365	8.06691	8.11305	8.76934	8.52938	8.50844
2010003O18RIK	8.85469	8.56829	9.01526	7.74343	7.92905	7.79064	8.44212	8.57531	8.39511
2010004A03RIK	6.04192	6.04432	5.91688	6.86571	6.50212	6.88418	5.51354	5.8662	5.73153
2010004B12RIK	7.9282	7.61739	7.70342	7.57346	7.50299	7.51567	7.71358	7.54996	7.40098
2010004J24RIK	5.79276	5.70944	5.86414	5.75956	5.69725	5.62861	5.78547	5.55272	5.60417
2010005A06RIK	5.83312	5.8356	5.79981	6.02592	6.04128	6.08136	5.98569	6.15426	5.71042
2010005H15RIK	5.53597	5.73228	5.45104	5.9376	5.78558	5.75882	5.82681	5.9554	5.92855
2010005J08RIK	6.58329	6.5355	6.68236	6.4862	6.51607	6.50953	6.36859	6.45276	6.60031
2010005O13RIK	9.42369	8.93052	8.84764	9.73205	9.46571	9.18656	9.00111	8.92845	9.16476
2010007H12RIK	10.0868	10.031	9.87338	9.16666	9.29388	9.31298	10.0516	9.61678	9.70911
2010011I20RIK	6.26946	6.47509	6.62497	6.1674	6.14919	6.16703	6.85331	6.41174	6.1225
2010012C16RIK	6.64341	6.69182	6.54288	7.85877	8.07202	8.27681	7.59524	6.74979	7.21871
2010012F05RIK	8.28364	8.22709	7.57152	7.69818	7.65339	7.61414	8.51723	8.18326	8.41277
2010012O05RIK	5.87485	5.81112	5.89098	5.99325	6.14622	6.15839	5.82872	5.54425	5.86741
2010013E08RIK	5.93238	6.22285	6.57638	6.33051	6.19187	6.37646	5.66549	5.91231	6.0943
2010015L04RIK	5.67282	5.83435	5.77934	6.12997	6.24362	6.31888	5.7111	5.88525	6.14341
2010016B13RIK	5.84037	5.80259	5.6409	5.85018	5.73386	5.77075	5.83924	5.81942	5.8782
2010016F14RIK	5.85218	6.21546	5.75941	5.90733	5.71263	5.77747	5.87444	5.78824	5.78443
2010100O12RIK	6.86721	6.74707	6.67959	7.65859	8.04305	8.22432	7.4507	7.24671	7.28425
2010106E10RIK	5.90431	6.27493	5.85054	5.83999	5.87022	5.85784	5.90146	5.98009	6.03595
2010106G01RIK	6.55239	6.86943	6.61024	6.94201	6.90579	6.82735	6.62135	6.64226	6.70518
2010107E04RIK	12.1274	12.1274	12.134	11.9948	12.1856	12.3003	12.551	12.551	12.35
2010107G12RIK	6.32636	5.98182	5.98616	6.97341	7.23149	7.46357	8.00873	6.40337	6.53818
2010107G23RIK	5.58176	5.51338	5.59294	5.75805	5.73441	5.64327	5.73484	5.7308	5.56816
2010109I03RIK	5.69564	5.57542	5.54726	5.77987	5.79592	5.96021	5.64811	5.73633	5.62321
2010110K16RIK	10.3819	10.2454	10.0456	9.88593	9.82459	10.0172	10.3082	9.81788	10.1647
2010110M21RIK	11.8873	11.7282	11.8753	11.7942	11.6103	11.593	11.8145	11.6169	11.6907
2010110O04RIK	5.87566	5.61292	5.86191	5.95289	5.85821	5.87644	5.94039	5.7175	5.81886
2010110P09RIK	5.72279	5.60682	5.6637	5.80964	5.707	5.49451	5.78712	5.56994	5.69337
2010111I01RIK	7.02144	6.93319	7.09836	7.15249	7.07935	7.33524	7.12472	6.93561	6.97341
2010200O16RIK	7.21434	7.11947	6.4791	7.75637	7.4313	7.48591	7.69031	8.04305	7.63617
2010204I15RIK	7.71198	7.571	7.24726	8.52817	8.58422	8.23555	7.70342	7.98501	7.93984
2010204N08RIK	5.87404	5.74276	5.61185	5.53158	5.68392	5.61599	5.73105	5.87369	5.56109
2010208K18RIK	5.71902	5.75005	6.16067	5.72995	5.7836	5.82316	5.80358	5.93032	5.47881
2010300G19RIK	9.4709	9.43154	9.73374	9.33556	9.38581	9.40239	9.02889	9.37454	8.91261
2010301N04RIK	7.30565	7.02329	7.64741	6.78976	6.82205	6.82277	7.25481	7.13159	7.3458
2010305A19RIK	7.69382	8.06433	7.36559	7.04667	7.26537	7.13084	6.95141	7.3716	7.01683
2010305C02RIK	6.21097	6.07716	5.8917	5.70904	5.9113	5.7827	5.74832	5.82594	6.21664
2010308M01RIK	7.4293	6.96204	7.27962	11.0139	10.9967	10.766	9.213	7.52099	7.7698
2010309E21RIK	5.86704	5.67665	5.87937	5.60409	5.59473	5.49384	5.75103	5.66515	5.59541
2010311D03RIK	8.45017	8.68299	8.51939	7.76046	7.912	8.02285	8.3441	8.3709	8.19
2010315L10RIK	9.6671	9.53624	9.66525	9.17717	9.31171	9.30528	9.8812	9.67722	9.46185
2010316F05RIK	9.44579	9.23824	9.52783	8.73225	8.76328	8.71221	8.8126	8.35195	8.39572
2010319C14RIK	11.5965	11.5411	11.8591	11.2211	11.2211	11.2191	11.1861	11.593	11.5269
2010321M09RIK	9.56486	9.5204	9.8478	9.50324	9.62991	9.53306	9.79006	9.63201	9.85835
2010323F13RIK	5.7716	5.99381	5.60019	5.72298	5.87415	5.81652	5.57346	5.76712	5.68268
2200001I15RIK	5.64327	5.57172	5.47863	6.16945	6.18004	6.04472	6.38267	6.02101	6.58273
2200002K05RIK	5.69703	5.70984	5.85705	5.70733	5.84307	5.69979	5.7592	5.67486	5.76086
2210006M16RIK	5.87348	5.63781	5.54078	5.6572	5.69093	5.63348	5.7784	5.60254	5.77489
2210008A03RIK	6.24279	6.60506	6.16498	5.81696	6.11093	5.95808	5.97224	6.43924	6.57218
2210008I11RIK	9.23532	9.52527	9.81295	9.40074	8.85254	8.88459	8.42447	9.15537	9.13269
2210009G21RIK	6.33386	6.36156	6.26284	6.09954	6.09751	6.06739	5.79037	5.83407	5.62421
2210010A19RIK	7.09762	6.82205	7.35169	6.44698	6.51252	6.5364	6.74353	6.6679	6.64042
2210010B09RIK	6.89085	7.20844	6.87946	6.49969	6.39851	6.5885	6.72055	7.03765	6.91725
2210010C04RIK	5.81401	5.75554	5.64191	5.93969	5.96812	5.96496	5.98952	5.92684	6.05915
2210010L05RIK	5.70292	5.73688	5.79893	5.66712	5.6192	5.5298	5.69854	5.67935	5.73765
2210012G02RIK	6.98987	6.38715	6.70147	6.88975	6.84225	6.83369	6.77177	6.67739	6.65761
2210013K02RIK	6.67576	6.40821	5.60769	7.37787	7.46121	7.12111	6.47134	7.02887	5.94168
2210016L21RIK	7.23567	7.82431	7.53455	7.14298	7.09038	7.14792	7.20128	6.93472	6.9839
2210018M03RIK	9.05392	8.72486	9.08724	8.55892	8.43972	8.42763	9.39076	9.23039	9.1781
2210020M01RIK	5.79165	5.87499	6.36783	5.73931	5.86939	5.83053	5.79263	6.26625	5.93802
2210021A15RIK	8.43674	8.43674	8.49742	8.6479	8.53595	8.7509	8.90838	8.4608	8.77113
2210021J22RIK	8.22432	7.66478	7.79977	7.63444	7.03063	7.37098	6.89678	7.47995	7.0854
2210023C10RIK	5.6652	5.83103	5.71612	5.72004	5.79793	5.635	5.93628	5.65819	5.81692
2210023G05RIK	5.93141	5.91393	6.11503	5.89237	5.78429	5.87569	5.94755	5.67072	5.78924
2210038L17RIK	5.91341	6.11984	6.02962	6.06241	6.00388	5.96111	6.24225	6.01822	6.07799
2210402C18RIK	6.6347	6.04397	6.44766	6.51774	6.22664	6.23069	6.85411	6.61707	6.57941
2210403B10RIK	5.57246	6.02093	5.90141	5.56586	5.70522	5.62149	5.80803	5.94908	5.45104
2210404D11RIK	8.05798	8.15527	7.66594	8.11007	8.07139	7.91466	8.51034	8.17928	8.36487
2210404G23RIK	5.77172	6.02015	5.96219	6.22455	6.13871	6.2825	6.36441	6.13963	6.36716
2210407C18RIK	5.84515	5.54947	5.81756	5.69644	5.76063	5.65605	5.67602	5.62182	5.97932
2210407G14RIK	5.61846	5.59123	5.69972	5.65299	5.8227	5.62023	5.8489	5.69453	5.75748
2210409E12RIK	5.7407	5.75144	5.94828	5.76191	5.60643	5.4029	5.71592	5.75456	5.65147
2210409M21RIK	6.22533	6.5711	6.04105	6.47191	6.65089	6.68778	6.78188	6.38072	6.30565
2210412D01RIK	8.99277	8.6297	8.51034	8.9625	9.12498	9.21876	9.00194	9.18938	9.12382
2210412K09RIK	8.36112	8.76605	8.42685	8.94337	8.95823	8.68978	8.70176	8.47293	8.21024
2210413P10RIK	6.00708	5.93114	5.92706	5.80423	5.79274	5.68837	5.77147	5.73765	5.70345
2210413P12RIK	5.83613	6.07206	5.66351	5.65807	5.66365	6.21708	5.73386	5.91674	5.70127
2210415M20RIK	9.65791	9.62573	9.78721	10.0597	10.2727	10.0263	10.4053	10.0193	9.98041
2210417D09RIK	5.91762	5.91381	5.66921	5.69445	5.72747	5.65648	5.72115	6.01674	5.88437
2210417J20RIK	5.61882	5.65922	5.49738	5.66596	5.81601	5.68782	5.72256	5.56741	5.66895
2210418O10RIK	10.345	10.1964	9.73575	10.8177	10.6904	10.6685	10.7503	10.1374	10.2675
2210421G13RIK	5.81876	5.64214	5.71511	6.08552	6.00568	5.99085	6.32672	6.15583	6.04814
2300002D11RIK	5.85725	5.77877	5.8213	5.69118	5.78236	5.75096	6.07572	5.77886	5.81785
2300002G24RIK	6.03638	5.76104	5.9946	5.79449	5.81087	5.84771	5.93789	5.94188	5.95737
2300002M23RIK	5.75677	5.8475	6.19298	5.80679	5.88379	5.78534	5.75255	5.77142	5.82135
2300002O18RIK	5.67169	5.68077	5.77	5.94787	5.90695	5.91792	6.0295	5.96665	5.98578
2300003C06RIK	5.80799	5.69205	5.42948	5.96427	5.91333	5.77852	6.06908	5.9075	5.75459
2300003P22RIK	6.07311	5.68209	5.77502	6.68834	6.21929	6.10156	5.93286	6.03235	5.9454
2300005B03RIK	6.07729	5.88819	5.67496	5.65488	5.89131	5.8702	5.68219	5.65576	5.607
2300006N05RIK	6.09504	5.95932	5.57996	5.75318	5.67109	5.77027	5.71126	5.87636	5.92977
2300008B03RIK	7.37474	7.48772	6.93561	7.73948	7.5513	7.52366	7.64406	7.4068	7.46467
2310001A20RIK	8.77888	8.44577	8.93406	8.59992	8.70001	8.66914	8.47792	8.43674	8.57308
2310001L23RIK	5.80265	5.87132	5.76109	6.03759	5.92736	5.81139	5.99644	5.67169	5.72113
2310002A05RIK	5.75536	5.64803	5.66427	5.80358	5.78219	5.72502	5.64357	5.43909	5.76796
2310002B06RIK	7.47199	7.46404	7.60767	6.53009	6.42357	6.38188	6.95336	6.81919	7.90694
2310002B14RIK	5.94792	5.84083	5.83035	5.53212	5.64618	5.54959	5.62667	5.75351	5.85356
2310002J15RIK	5.78043	5.67211	5.92886	5.69997	5.69749	5.78478	5.3485	5.68486	5.58625
2310002L09RIK	5.79403	5.84436	5.8489	5.70509	5.72827	5.73833	5.91521	5.86447	5.87718
2310003C23RIK	7.47633	7.85847	7.61414	7.67392	7.69577	7.60654	8.35347	7.86767	8.02672
2310003F16RIK	10.2135	10.1265	10.33	10.4997	10.5251	10.5168	10.6976	10.436	10.5372
2310003H01RIK	7.49988	7.23896	7.55572	7.25326	7.31367	7.25822	7.69882	7.73907	7.92539
2310003L22RIK	7.11054	7.14617	7.22441	7.70864	7.68521	7.67087	7.67121	7.42029	7.38157
2310003P10RIK	8.24015	8.41809	8.48997	8.34447	8.14502	8.16805	8.28281	8.39816	8.49372
2310004I24RIK	8.19936	8.09671	8.37585	8.21195	8.20879	8.06119	8.3845	8.3893	8.1263
2310004L02RIK	8.14786	8.00965	7.42623	8.64277	8.4256	8.42685	7.5143	8.16467	8.14598
2310005E10RIK	9.10283	9.18324	9.38767	8.12498	8.28653	8.41396	9.07924	8.60593	8.92005
2310005G13RIK	5.80893	5.82875	5.89723	5.81766	5.8987	5.99831	5.7672	5.54959	5.71982
2310005N01RIK	6.46805	6.28566	6.17811	6.31553	6.59321	6.62764	6.77474	6.49493	6.53052
2310005N03RIK	9.47623	9.33363	9.30528	9.65586	9.53306	9.68057	9.8478	9.53757	9.54208
2310005O14RIK	7.47934	7.53053	7.93426	6.85595	7.01625	6.93114	7.59031	7.34929	7.47336
2310005P05RIK	6.20566	5.55947	6.03533	5.81158	5.94822	5.77857	5.89113	6.00996	5.78036
2310006J04RIK	7.18571	7.34929	7.12228	6.69182	6.85164	6.63438	6.71938	7.64208	7.2364
2310007A19RIK	6.14985	5.91425	6.47258	6.4549	6.20035	6.30504	5.27756	6.02148	5.89383
2310007B03RIK	5.88394	6.00013	5.7075	5.78189	5.93743	6.01316	6.14699	5.83917	5.7416
2310007F04RIK	5.79584	5.75587	5.9318	5.78514	5.67669	5.71111	5.70942	5.70433	5.9398
2310007F21RIK	9.26303	9.04111	8.86603	9.20743	9.0069	8.83215	8.96304	9.06925	9.01455
2310008H04RIK	6.17375	5.88767	6.04643	6.48728	6.47745	6.59998	6.2953	6.06584	6.00495
2310008H09RIK	7.2761	7.33181	7.52603	7.13862	7.20487	7.29268	7.46737	7.21081	6.87476
2310008M10RIK	11.6601	11.4227	11.8948	10.5807	10.8519	10.8531	11.176	11.1138	11.2042
2310008M20RIK	6.71311	6.97573	7.43231	6.63398	6.63272	6.74211	6.66371	6.41477	6.68922
2310009E04RIK	5.91605	5.82103	5.93944	5.82947	5.6418	5.6777	5.60498	5.66134	5.78719
2310009E07RIK	7.13899	7.15655	7.7822	6.97117	6.72969	6.72969	6.60183	6.89557	6.82352
2310009N05RIK	8.58743	8.79181	8.45642	9.02926	8.91679	8.66963	8.00589	8.99149	8.72676
2310010B21RIK	7.23727	7.32836	7.26737	7.36733	7.2437	7.29871	7.07212	7.33023	7.25927
2310010G13RIK	6.36315	6.25879	6.24868	6.56017	6.55993	6.59627	6.71373	6.59407	6.53009
2310010I16RIK	5.56021	5.64658	5.69348	6.12105	5.8997	5.97569	5.7755	5.63348	5.72374
2310010M24RIK	7.79402	7.8381	7.13118	7.75452	7.70565	7.59045	7.72785	8.24961	8.55795
2310010P21RIK	5.89596	5.85155	5.64327	5.78429	5.71439	5.74241	5.61435	5.82366	5.72236
2310011J03RIK	6.95141	7.06037	6.92271	6.82469	6.77685	6.68595	7.21558	7.22676	6.9589
2310012P17RIK	5.92075	6.25726	5.89276	6.12956	6.15472	6.15854	6.31288	6.27908	6.4407
2310014H19RIK	7.87495	7.80652	7.68497	7.61573	7.53366	7.46121	7.01429	7.71693	7.47633
2310014L17RIK	5.87079	6.22214	6.45904	6.11793	6.28164	6.17375	5.80088	5.85798	6.08114
2310015J09RIK	5.86338	5.76199	5.93311	6.03926	6.19492	6.05199	6.7302	5.67838	6.18459
2310015N07RIK	6.71556	6.88391	7.24199	6.66305	6.65429	6.84789	7.35679	6.8982	7.03411
2310015N21RIK	8.46163	8.08327	8.31973	7.63335	7.67738	7.65591	8.2447	8.30167	8.15681
2310016A09RIK	5.62641	5.80651	5.6648	5.68354	5.46574	5.67859	5.80612	5.76988	5.69598
2310016C08RIK	8.09805	8.09107	8.02733	8.03473	7.98451	7.90539	8.32248	8.15432	8.07693
2310016C16RIK	5.80777	5.71831	6.05565	5.89437	5.87884	5.89108	5.77812	5.76793	5.80226
2310016E02RIK	10.315	10.3378	10.345	9.93516	10.2079	10.0033	10.8177	10.3987	10.4819
2310016F22RIK	5.77109	5.70768	5.96131	5.94319	5.73137	5.91153	5.95965	5.87807	5.62494
2310016K04RIK	6.40439	6.69642	6.19075	9.23687	9.12944	8.96212	8.6981	6.89249	6.90506
2310016M24RIK	10.6074	10.3901	10.5421	10.3819	10.3353	10.2866	10.602	10.1417	10.3056
2310016N21RIK	5.7098	5.60023	5.65752	5.67417	5.84797	5.82553	5.46195	5.94254	5.74115
2310020A21RIK	5.6741	5.98001	5.77069	5.79021	5.64037	5.69659	5.71389	5.87995	5.69019
2310020H19RIK	9.79719	9.69014	10.2745	9.34958	9.35345	9.27249	9.7834	9.47224	9.46134
2310020H20RIK	11.0683	10.65	11.1068	10.4862	10.5379	10.2698	10.7246	10.4521	10.3801
2310020P08RIK	6.39105	6.43554	6.11669	6.37128	6.36248	6.29739	6.05973	6.30209	6.03796
2310021H06RIK	5.79	5.78868	5.99318	5.78419	5.78906	5.75743	5.8851	5.85256	5.96364
2310021P13RIK	7.5755	7.54996	7.24972	8.02786	7.90067	7.57732	7.60654	7.77614	7.66478
2310022A10RIK	6.02958	5.97939	6.01816	6.39341	6.39402	6.33125	6.70956	6.35768	6.35861
2310022B05RIK	7.35089	7.4389	7.84888	7.03983	7.17306	6.90052	7.37816	7.65792	7.29941
2310026E23RIK	5.56338	5.76374	5.84894	5.71592	5.77164	5.65276	5.69961	5.6741	5.88087
2310026J01RIK	6.15503	6.29815	6.40536	5.8004	5.96569	5.82611	5.93586	5.85951	5.83845
2310028N02RIK	5.99878	5.90095	5.70824	5.96305	5.88111	5.95857	5.75484	5.81064	5.77715
2310030G06RIK	5.61023	5.60585	6.02049	5.69802	5.61758	5.7755	5.69921	5.86131	5.8543
2310031L18RIK	6.02458	6.13121	6.00189	6.07079	6.267	6.32952	6.178	6.31341	6.26571
2310032D16RIK	7.78914	8.03427	7.91147	8.07033	7.86607	8.04782	7.32321	7.67121	7.94427
2310032F03RIK	6.08943	6.03551	5.78032	5.8479	5.9449	5.85821	6.03976	6.19041	5.83728
2310033E01RIK	6.13717	6.05828	6.5711	5.98888	5.90457	5.9797	5.80215	6.07048	5.92654
2310033K02RIK	6.07168	6.04297	5.73436	5.69921	5.62879	5.64577	5.69239	5.82155	5.63854
2310033P09RIK	7.60973	7.38299	7.39831	7.36408	7.33285	7.4062	7.54562	7.12472	7.34212
2310034C09RIK	5.96998	5.8241	6.00449	5.89922	5.8409	5.84674	6.10921	5.79165	5.84076
2310034L04RIK	6.90835	7.27915	7.28144	6.63303	6.36066	6.29241	6.22393	7.07212	6.32
2310035C23RIK	6.57382	6.66055	6.76268	6.35363	6.43834	6.40986	5.93594	6.39595	6.3222
2310035K24RIK	6.95196	7.11473	7.21527	6.82205	6.94169	6.88598	7.12723	7.02502	6.91545
2310036D22RIK	7.91371	8.03977	7.62518	8.11763	8.0692	8.04723	7.35308	8.27387	7.84813
2310036O22RIK	11.468	11.3131	11.9248	10.9303	10.8922	10.7898	10.9843	11.0973	11.0601
2310037I24RIK	9.0707	8.8807	9.00964	9.23775	9.17635	9.14405	9.15956	9.46282	9.34694
2310037P21RIK	5.69044	6.05092	5.47429	5.67995	5.73283	5.5972	5.56586	5.46574	5.63262
2310038H17RIK	6.00317	6.17426	5.83341	6.14077	6.13681	6.13852	6.3858	6.10299	6.12647
2310038K02RIK	5.98876	6.11107	5.87532	5.90782	6.01719	5.75733	5.93006	6.10422	5.79704
2310039E09RIK	5.991	5.75886	5.86333	5.7955	5.90782	5.72811	5.85852	5.83821	5.86842
2310039H08RIK	9.30706	8.97932	9.70432	10.2566	10.1609	10.0326	9.79113	8.94974	8.89441
2310040C09RIK	6.30251	6.39105	5.97275	6.80372	6.79913	6.63079	6.06264	6.79086	6.37018
2310040M23RIK	5.60902	5.88401	5.78628	5.84578	5.90331	5.975	5.95842	5.78065	5.91561
2310041H06RIK	10.9269	10.8545	10.6379	10.2935	9.95617	10.1272	10.2135	10.0062	10.1352
2310042D19RIK	5.58114	6.03115	5.86277	6.7302	6.70761	6.68947	5.88437	5.37713	5.71336
2310042E22RIK	5.95556	5.99153	5.78249	6.07601	6.03969	6.0308	6.04012	6.21529	5.78411
2310042G06RIK	11.1823	11.1464	11.0995	10.9886	11.1013	11.2902	10.9631	10.8318	10.8253
2310042L06RIK	7.88621	7.81945	8.23297	9.14863	9.06974	8.96101	8.2888	8.16805	8.06657
2310042N02RIK	6.29477	5.88667	6.25915	5.87293	5.96207	6.00737	5.97145	5.823	5.95324
2310043K02RIK	5.41986	5.41229	5.40089	5.67807	5.78887	5.52447	5.9761	5.82888	6.0116
2310043L02RIK	5.78973	5.89628	5.90455	5.80341	5.90892	5.8824	5.87113	5.86775	6.03325
2310043N13RIK	6.86128	6.84	7.06537	6.51725	6.66426	6.54465	6.77254	6.77305	6.70293
2310044D20RIK	5.70274	5.87425	5.96618	5.665	5.80136	5.78259	5.56961	5.64516	5.66008
2310044G17RIK	8.39456	8.31475	8.6113	7.99764	8.13475	8.10571	8.1029	8.03685	7.93426
2310044H10RIK	10.2968	9.80183	9.73205	10.3204	10.086	10.1716	9.96345	10.0628	9.97214
2310045A20RIK	6.04777	5.80088	5.73169	5.74502	5.69946	5.70064	5.93129	5.86296	5.59582
2310045B01RIK	7.44064	7.01819	7.37189	7.39295	7.5432	7.54274	7.95472	7.32128	7.35537
2310046G15RIK	5.75667	5.64168	5.74453	5.80755	5.78946	5.78347	5.54975	5.51884	5.5671
2310046K01RIK	6.17906	5.68885	5.87412	5.82678	5.79641	5.85944	6.01526	6.07769	5.98465
2310046K10RIK	8.17004	8.4572	8.15325	9.11905	8.75618	9.12145	8.66143	8.37998	7.58785
2310046O06RIK	6.7431	6.58273	6.39799	6.62431	6.59459	6.51842	6.4103	7.10138	6.59585
2310047C04RIK	6.7124	6.85716	6.72374	6.13271	6.17416	6.20773	6.48333	6.80238	6.38432
2310047C17RIK	5.99474	5.68429	5.80442	6.05594	5.85391	5.82298	6.06157	5.80818	5.62813
2310047D13RIK	6.3574	6.282	6.57382	6.04428	5.94418	6.10299	6.45242	6.46978	6.3287
2310047H23RIK	10.4179	10.8062	10.0041	11.3682	11.3682	11.0926	10.8152	10.7172	10.6985
2310047I15RIK	6.96517	6.83563	7.25206	6.51971	6.77507	6.62304	6.65429	6.78913	6.99966
2310047M10RIK	7.74521	7.32702	7.23812	7.43928	7.16617	6.97473	7.87399	7.43678	7.6946
2310047O13RIK	6.78579	6.63398	6.53155	6.72714	6.86908	6.78706	6.66055	6.97028	6.64341
2310050B20RIK	7.42733	7.3259	7.57603	7.08961	7.22493	7.26537	7.92905	7.3805	7.46953
2310050N11RIK	5.62518	5.55352	5.64439	5.67164	5.64226	5.55352	5.63922	5.62206	5.64389
2310051D06RIK	6.09004	6.40951	6.27779	6.07755	6.30524	6.11425	6.47838	6.12448	6.21873
2310051M13RIK	5.4877	5.39331	5.41789	5.44938	5.40794	5.57403	5.91635	5.73972	5.81962
2310056P07RIK	8.16916	8.19201	8.55607	8.65937	9.04524	9.21094	8.60231	8.52511	8.52099
2310057D15RIK	8.3598	8.4147	8.48468	8.60383	8.74557	8.71117	8.72486	8.70176	8.72732
2310057G13RIK	7.14869	7.03848	7.28344	7.43374	7.59045	7.69609	7.46819	7.18929	7.31405
2310057H16RIK	5.63117	5.94463	5.63032	6.12313	5.86693	5.83387	5.60799	5.86456	5.72901
2310057J16RIK	5.70602	5.91708	5.67675	5.89915	5.78773	5.90043	5.63206	5.71548	6.10327
2310057J18RIK	5.66609	5.94101	5.80823	5.69179	5.70067	5.80088	5.66273	5.73847	5.87453
2310057M21RIK	5.92764	6.19412	6.02792	5.85414	5.74851	5.79132	5.83152	5.58723	5.83951
2310057N15RIK	5.79169	5.89573	5.79764	5.55325	5.43107	5.47863	5.51964	5.78478	5.76435
2310058A11RIK	6.38934	6.81265	6.2789	6.9158	7.15389	6.95382	6.64193	6.20081	6.41257
2310058J06RIK	5.86387	5.86427	5.99037	5.64251	5.83462	5.82779	5.70906	5.48473	5.83542
2310058N18RIK	5.32163	5.41568	5.25013	5.67402	5.69138	5.54183	5.86271	5.98963	5.5577
2310061A22RIK	6.4791	6.6582	6.78215	6.2185	6.18149	6.20322	6.59407	6.87188	6.63079
2310061C15RIK	7.21825	7.073	7.0892	7.20801	7.5948	7.39713	7.73875	7.48772	7.66041
2310061F22RIK	8.33452	8.34447	8.08979	7.76428	7.67418	7.71886	7.95795	8.11763	8.06052
2310061G07RIK	5.94687	6.11412	5.87967	5.96026	5.87436	5.83932	5.79873	5.83245	5.88101
2310061I09RIK	5.83203	6.10353	5.95223	6.08404	6.12873	6.1959	6.43685	6.13657	6.7932
2310061N23RIK	6.9589	7.42274	7.89225	9.3971	9.35041	9.58136	7.05921	7.46555	7.45565
2310065K24RIK	8.63775	8.44794	8.2383	9.12177	9.01734	9.16726	9.3193	8.96765	9.08073
2310066E14RIK	7.46467	7.87022	7.5143	8.00928	7.83037	7.5818	7.39876	8.00701	7.5133
2310066I18RIK	5.96646	5.86696	5.77698	5.84385	5.85372	5.92706	6.29638	5.71999	5.90544
2310066N05RIK	9.73575	9.62933	9.9185	9.39968	9.38975	9.41214	9.60723	9.57931	9.40239
2310067B10RIK	6.84225	7.05395	7.13362	6.32335	6.32023	6.36107	7.0391	6.69407	6.92891
2310067E08RIK	6.0601	6.08911	6.43066	6.69642	6.46788	7.10304	6.47541	6.20469	6.53463
2310067G05RIK	6.82503	6.43172	6.96852	6.64732	6.55815	6.57424	6.68947	6.85844	6.74211
2310069I04RIK	8.02981	7.90409	8.21074	7.32164	7.38381	7.5721	7.51567	7.48398	7.70669
2310069N01RIK	6.19187	5.75336	5.89763	5.74982	5.83932	5.58864	5.85044	5.7031	6.16306
2310069P03RIK	6.5553	6.55798	6.69349	6.36621	6.44429	6.58301	6.63009	6.5929	6.98822
2310073E15RIK	7.5143	6.97448	7.1127	7.73597	7.53821	7.45526	7.59319	7.50409	7.10634
2310075A12RIK	8.66767	8.29673	7.83401	9.03603	9.31833	9.17258	8.91261	9.15253	9.00284
2310075C12RIK	5.73812	5.89706	6.13501	5.47405	5.49384	5.63522	5.63194	5.63206	5.67685
2310076L09RIK	5.77623	5.67773	5.54526	5.87992	5.80857	5.7664	5.66566	5.7426	5.54684
2310079F23RIK	6.43206	6.29188	6.07854	6.14063	6.07397	5.91428	5.76426	5.7592	6.04994
2310079N02RIK	8.99368	8.3922	8.31184	7.87495	7.93722	7.905	8.45274	8.23399	8.49204
2400001E08RIK	8.53202	8.11856	7.98631	8.67482	8.82734	8.7678	8.87551	8.90755	8.8573
2400002F11RIK	5.81628	5.8101	5.97614	5.76327	5.69466	5.68345	5.90738	5.94743	5.71934
2400003B06RIK	10.3369	10.216	9.9417	10.2357	10.1272	10.2454	10.6154	10.5492	10.6124
2400003C14RIK	10.1462	9.98041	10.2066	10.5268	10.2787	10.1964	9.84973	10.3068	10.2135
2400003N08RIK	10.7632	10.9133	11.0278	10.5042	10.4997	10.5372	10.8545	10.9538	10.908
2400006A19RIK	6.9342	6.86788	6.80169	7.66264	7.81847	7.83336	7.7399	7.32803	7.42302
2400006N03RIK	7.01242	6.76909	6.69702	6.90093	6.99136	6.76871	7.01214	6.88205	6.58388
2400009B11RIK	6.4599	6.42246	6.35003	6.06657	6.06864	6.12926	6.17034	6.46276	6.23069
2400010D15RIK	9.9852	9.92702	9.62061	10.1272	9.68891	9.73915	9.21184	9.65586	9.45552
2400010G15RIK	7.70087	7.33786	7.04297	7.62935	7.59426	7.40927	7.12156	7.36148	6.89249
2410001C21RIK	8.88006	8.81609	8.24895	9.10227	9.03014	9.06477	9.09152	9.24723	9.18514
2410001E19RIK	9.37454	9.38639	9.55465	8.88106	8.72885	8.67837	9.00629	9.07397	9.03014
2410001H17RIK	8.59262	8.41011	8.97561	8.5201	8.49851	8.37457	8.9958	8.45274	8.58346
2410002F23RIK	6.85446	6.98551	6.44907	7.62834	7.18844	7.46194	6.65645	7.00109	7.30029
2410002I01RIK	6.70428	6.63144	6.74487	6.60468	6.46994	6.52512	6.06103	6.53234	6.6205
2410002O22RIK	7.36848	7.52366	7.43723	7.33899	7.52366	7.30295	7.49301	7.64337	7.55836
2410003C20RIK	5.8432	6.11138	5.81617	6.12751	6.24736	6.24795	6.34249	6.26827	6.42338
2410003P15RIK	7.78373	7.65216	7.65131	7.42274	7.40282	7.4821	7.56718	7.69239	7.5432
2410004A20RIK	6.35704	6.3584	6.38836	6.45647	6.36955	6.38085	6.26391	6.25854	6.2223
2410004B18RIK	7.57692	7.78778	7.52712	7.86644	7.84381	7.76768	7.9028	7.60548	7.64269
2410004C24RIK	6.66612	6.86602	7.0052	6.24173	6.50093	6.38009	7.13032	6.63438	6.70761
2410004F06RIK	5.82932	6.17049	5.95257	6.0943	5.93571	6.02695	6.11206	6.20092	5.83824
2410004H02RIK	6.65487	6.90579	6.55182	6.62764	6.88418	6.86873	6.98438	6.67908	6.69102
2410004J23RIK	5.81517	5.8245	6.01196	6.12939	6.06752	6.09814	5.90498	6.16945	5.99758
2410004L22RIK	7.77152	7.94545	8.29151	6.98277	7.24932	7.06037	8.02336	7.74613	7.8282
2410004N11RIK	8.38721	8.06182	8.44524	8.09107	8.16396	8.09606	8.47612	8.58696	8.4572
2410005H09RIK	6.51272	6.02089	6.63398	6.01768	6.09004	6.03733	6.33805	6.09316	5.89526
2410005K17RIK	9.52527	9.64934	9.61775	9.01265	8.86889	8.99277	9.73915	9.27447	9.42037
2410005K20RIK	9.01014	9.34372	9.46761	8.63038	9.05273	9.14067	9.1118	9.24777	8.85154
2410005O16RIK	6.08877	6.34351	6.24225	6.4968	6.54866	6.43094	5.89915	6.43383	6.42505
2410006F12RIK	8.05355	8.10023	8.26124	7.8325	7.85563	8.03685	7.78307	7.89256	7.97929
2410007P03RIK	6.059	5.86091	5.93132	6.25791	6.13131	6.27056	6.00119	5.90979	5.89442
2410008J05RIK	6.73046	6.83733	6.0787	6.43958	6.18459	7.10707	6.97259	6.25895	7.11765
2410008K03RIK	6.04461	5.88773	5.64344	5.86729	5.71883	5.66696	5.92611	5.67741	5.68657
2410011G03RIK	9.33506	9.60723	9.74844	9.17441	9.42945	9.64824	9.80183	9.50807	9.74515
2410011O22RIK	8.00335	8.12717	8.27295	7.52194	7.52603	7.53455	7.62577	7.60035	7.96935
2410012C07RIK	6.29921	6.1463	5.97314	5.84348	5.82806	5.89252	5.88896	5.82709	5.70753
2410012H02RIK	5.75963	5.95816	6.03115	5.80509	5.85884	5.85852	5.73884	5.92591	5.56379
2410012M04RIK	5.81914	6.0677	5.88395	6.71285	6.8588	6.91482	6.73347	6.57748	6.33161
2410014A08RIK	7.09836	6.78762	6.66426	6.5313	6.55657	6.65429	7.11406	6.81265	6.86873
2410015A16RIK	6.99182	6.62621	6.3853	7.57061	7.10064	7.41756	5.96929	7.66898	6.94771
2410015B03RIK	6.70485	6.74579	7.16966	6.2825	6.39263	6.34219	6.45156	6.57863	6.67101
2410015M20RIK	7.86887	7.84813	7.54156	8.52099	8.65739	8.65615	9.01933	8.37407	8.56363
2410015N17RIK	7.75895	8.09234	7.92455	8.27529	9.00522	9.16476	9.66624	8.65366	8.89503
2410016F19RIK	6.63303	6.54738	6.54346	6.664	6.87434	6.78762	6.97514	6.78188	6.79086
2410016O06RIK	7.06183	6.74979	6.43685	6.90483	7.14705	6.96571	7.59949	7.19602	6.82948
2410017I18RIK	8.36863	8.60455	8.77701	8.3284	8.36754	8.42021	8.26939	8.59382	8.50789
2410017P07RIK	8.15929	8.19936	8.64379	7.39766	7.74102	7.48839	7.92714	7.99939	8.03685
2410018C17RIK	10.804	10.6194	10.714	10.4435	10.2009	10.1835	10.0826	10.3794	10.2044
2410018C20RIK	5.6315	5.68626	5.7364	5.85934	5.83321	5.71956	5.75511	5.74279	5.75026
2410018G20RIK	8.62592	8.50712	8.72539	7.92253	8.17252	8.10397	8.95962	8.66914	8.67482
2410018G23RIK	8.69716	8.67235	8.73315	8.59133	8.93503	8.70692	9.05331	9.22355	9.14731
2410018I08RIK	5.90748	6.07248	6.00388	5.91454	5.80761	5.8829	5.89337	5.75445	5.74056
2410018L13RIK	6.0518	5.82673	5.93155	5.71339	5.65801	5.66118	5.71367	5.71904	5.73599
2410018M08RIK	5.83009	5.91688	5.82993	5.73751	5.79955	5.54496	5.74271	5.40593	5.66646
2410019A14RIK	5.73505	5.86421	5.47543	6.00074	6.25565	6.21607	5.71966	5.97569	6.34502
2410019G02RIK	8.1263	8.11551	7.60712	8.21717	7.79977	8.01765	7.4942	8.00335	8.06119
2410022L05RIK	5.6909	5.74491	5.71152	5.7866	5.8431	5.72475	5.76206	5.6729	5.66323
2410024A21RIK	8.92783	9.19609	8.83809	9.40677	9.14509	9.17441	8.29591	9.18251	8.81804
2410025L10RIK	9.36221	9.56895	9.43807	9.58026	9.03143	9.06336	8.30383	9.06797	9.09838
2410030J07RIK	6.82149	6.66145	6.83938	7.15311	7.00721	6.8386	5.939	7.04592	6.5361
2410042D21RIK	7.50219	7.56319	7.77379	7.35573	7.53877	7.42733	7.62308	7.64741	7.66841
2410066E13RIK	6.9954	6.30634	7.22187	6.90052	6.46805	6.69307	6.41952	6.03659	5.88316
2410075D05RIK	5.54815	5.51744	5.44938	5.61268	5.59882	5.66682	6.03659	5.82416	5.86438
2410080H04RIK	5.72475	5.63284	5.76515	5.58021	5.61585	5.58442	5.70692	5.66725	5.55433
2410080P20RIK	6.3242	6.09504	6.08084	7.09574	7.0052	7.20801	6.77685	7.00181	6.64836
2410081M15RIK	6.09371	6.12873	6.49459	5.92341	5.95115	5.90969	6.23575	6.19028	6.11206
2410091C18RIK	6.24125	6.20345	6.05329	5.88957	6.03394	6.0774	6.21065	6.18514	6.19847
2410104I19RIK	12.0501	12.0303	12.1002	11.4017	11.5467	11.5176	11.6473	11.7191	11.7657
2410116G06RIK	6.04483	5.93275	5.88213	5.69104	5.70494	5.73672	5.7808	5.7168	5.82927
2410118I19RIK	6.61904	7.05003	6.51457	6.95837	7.04016	7.1607	7.09597	6.95644	7.08695
2410125J01RIK	6.16749	5.80154	5.80028	5.78245	5.56517	5.88447	5.77235	5.89326	5.8489
2410127E16RIK	5.61273	5.71716	5.76416	5.59958	5.6739	5.74131	5.48107	5.63463	5.87364
2410127E18RIK	10.6409	10.4034	10.4962	9.97113	9.9185	9.79719	9.88044	10.222	10.1664
2410127L17RIK	6.55072	6.70891	6.04874	6.5885	6.73526	6.72055	6.49493	6.54346	6.33386
2410129H14RIK	7.89511	7.77717	8.6686	7.5481	7.54602	7.5648	7.2761	7.64985	7.72738
2410137M14RIK	6.00114	5.90251	5.79012	6.04808	5.90233	6.05378	5.96315	5.94768	6.16286
2410141K03RIK	5.8809	5.9048	6.31109	5.82832	5.87468	5.78647	5.93082	5.77035	5.72062
2410146L05RIK	5.66226	5.87307	5.69253	5.89363	5.98578	5.9236	5.87064	6.18668	5.99858
2410166I05RIK	6.47645	6.11382	6.13517	6.13954	6.00095	6.02069	6.10042	6.20114	6.17666
2410193C02RIK	6.2259	6.23069	6.238	6.14886	6.10932	6.10292	6.33416	6.14416	6.10959
2500001K11RIK	10.6332	10.2798	10.2968	9.92944	9.78195	9.60723	9.77774	10.1306	9.84737
2500002K03RIK	7.51648	7.7456	7.94545	7.91929	8.02607	7.98264	8.31545	7.74674	7.47501
2500002L14RIK	9.44724	9.45781	9.69554	9.5781	9.47224	9.38129	9.22531	9.349	9.33363
2500003M10RIK	11.5886	11.4256	11.6398	11.0374	11.0903	10.9576	11.3534	11.4533	11.3578
2510001I10RIK	7.0787	6.92082	7.07708	6.83695	6.72409	6.64965	6.56098	6.79734	6.73347
2510002A14RIK	6.94964	6.75225	6.88631	7.03765	6.99359	7.01081	7.15866	7.20206	7.18506
2510003E04RIK	7.31962	7.24262	7.12646	8.61436	8.31219	8.30442	7.99939	7.94041	7.94545
2510004L01RIK	6.39799	6.15602	6.75107	7.65669	7.28735	7.65339	6.80238	6.09844	5.76782
2510005D08RIK	7.65669	7.73389	8.23085	7.29584	7.54488	7.5267	8.5215	7.70039	7.92714
2510006C20RIK	6.18961	6.29223	5.88784	6.23721	6.40115	6.39263	6.47076	6.02473	6.08309
2510006D16RIK	11.0564	10.8191	10.9612	10.5861	10.4413	10.6047	10.7675	10.8062	10.8632
2510009E07RIK	7.7456	7.5852	7.56677	6.48861	6.57074	6.38596	7.87632	7.59085	7.7307
2510010F15RIK	7.83084	7.74579	8.03514	7.87632	7.86349	7.9025	7.90758	7.71609	7.70723
2510012J08RIK	8.25305	8.03834	7.97448	9.0249	8.92491	8.76444	8.01151	8.60044	8.43047
2510027J23RIK	5.82062	5.74131	5.58133	5.94138	5.8719	6.04953	5.74704	5.7957	5.5613
2510027N19RIK	10.9446	10.6646	10.9902	10.2698	10.3833	10.3781	10.7979	10.652	10.9996
2510038A11RIK	6.70518	6.45829	6.41952	6.31042	6.62135	6.48915	6.73046	6.68388	6.59853
2510039O18RIK	8.24258	8.49962	7.69299	8.24303	7.97865	7.94991	8.0594	8.08379	7.83995
2510040D07RIK	5.96515	5.92428	5.78301	5.96953	6.15027	6.02418	5.7416	5.73722	5.89612
2510042P03RIK	5.55701	5.79237	5.68423	5.68925	5.8667	5.75322	5.90604	6.11395	6.12567
2510048K03RIK	7.56755	7.7096	7.63197	7.4713	7.40539	7.35025	7.6212	7.51054	7.8604
2510048L02RIK	5.81652	5.83927	5.6808	5.89221	6.08979	5.86401	5.78639	5.62145	5.63836
2510048O06RIK	11.3988	11.3047	11.3988	11.6333	11.6601	11.7772	11.8873	11.3216	11.5134
2510049I19RIK	5.84661	6.17811	6.04387	6.27844	6.18504	6.05363	6.4709	6.51107	6.10816
2600001B17RIK	7.25206	7.56077	7.31272	7.35624	7.53683	7.65792	7.36105	7.33952	7.17667
2600001J17RIK	8.00965	8.54408	8.84148	7.65591	7.68252	7.8117	8.41336	8.16751	8.26619
2600002E23RIK	9.13096	9.05851	8.86124	8.12778	8.25617	8.10629	9.1018	8.82389	8.90755
2600003E23RIK	5.93062	6.06684	6.00119	5.84411	5.85901	5.84847	5.72298	5.82691	5.93311
2600005C20RIK	6.63852	6.75478	6.68165	6.79648	6.91991	7.13234	6.76405	6.58174	6.47863
2600005N12RIK	8.29757	8.3503	8.18326	8.02171	8.0696	8.08015	8.19311	8.31401	8.43419
2600005O03RIK	6.22745	6.34582	6.569	6.54465	6.69206	6.83695	6.86002	6.31663	6.26252
2600009E05RIK	9.90597	9.62061	9.79451	9.92335	9.8812	9.8674	9.87925	9.63736	9.85316
2600010E01RIK	5.46878	5.57187	5.5202	5.90439	5.99218	5.83853	5.99194	5.72854	6.08474
2600011C06RIK	5.49088	5.635	6.11382	5.87045	5.96214	5.90317	5.7903	5.66925	5.72401
2600011E07RIK	5.75181	5.81706	5.7478	6.0558	5.96878	6.05505	6.01304	5.77392	5.65632
2600013N14RIK	7.8117	7.75862	7.82221	8.05986	8.12832	8.06433	8.28574	8.13421	7.80106
2600014C01RIK	5.80259	5.48615	5.74531	5.68176	5.56673	5.49255	5.67343	5.50204	5.73433
2600014M03RIK	6.96493	6.85894	7.32128	6.32636	6.30652	6.22077	6.12121	6.37269	6.09879
2600016J21RIK	7.10231	7.0052	6.94347	6.41477	6.53009	6.6416	6.88468	6.69539	6.65508
2610001E17RIK	5.48055	5.50927	5.21569	5.3485	5.3569	5.33505	5.62243	5.54004	5.64129
2610002J02RIK	8.4608	8.51315	8.64683	8.36535	8.44927	8.38137	8.60967	8.29348	8.48082
2610002M06RIK	8.92708	9.19502	8.81609	8.35397	8.49565	8.55138	9.13354	8.61345	8.49742
2610003J06RIK	7.66525	7.56718	7.79316	7.66401	7.69418	7.68252	7.71982	7.89365	7.76768
2610007K22RIK	11.1239	11.468	11.5766	10.7396	10.5198	10.6181	10.54	11.3682	11.3022
2610009I02RIK	7.48314	7.51054	7.76938	6.53332	6.84945	6.5471	6.98032	6.89467	7.29032
2610012O22RIK	6.70219	6.87224	6.74041	7.42104	7.85474	7.85967	8.14502	7.72543	7.37816
2610014H22RIK	9.51649	9.42369	10.1082	8.94431	8.51554	8.43579	8.52881	8.98037	8.68817
2610016F04RIK	9.55026	9.54748	9.07768	10.0655	10.1071	10.028	9.44724	9.8674	9.88593
2610018G03RIK	5.68212	5.55631	5.8812	5.88823	5.7448	5.82914	5.7206	5.47764	5.66236
2610018L09RIK	8.09463	7.94695	8.02285	7.71358	7.87191	7.98501	8.5625	7.84968	7.78373
2610019A05RIK	6.53377	6.58459	6.2933	6.35205	6.73781	6.44443	6.3922	6.21247	6.3567
2610019F03RIK	8.89542	9.24192	8.69078	7.24561	6.46882	7.09201	7.66478	9.3869	9.51937
2610019I03RIK	6.88631	6.91545	7.37972	6.30396	6.71093	6.64862	7.52603	6.91263	7.05241
2610019N13RIK	9.49355	9.25071	9.61175	8.29115	8.4238	8.40549	8.6269	8.84565	8.78118
2610019P18RIK	5.64191	5.98387	5.6814	6.34351	6.52902	6.53966	6.20497	5.88279	6.11761
2610020C11RIK	7.67692	7.76495	8.02171	7.42843	7.21901	7.23309	6.59523	7.33693	7.07763
2610020H08RIK	6.1178	6.28744	6.00996	6.14721	6.14511	6.11943	5.76009	5.90779	5.9252
2610020H15RIK	7.4773	7.63691	7.81139	7.54539	7.4968	7.3855	7.57899	7.43427	7.3341
2610020N02RIK	6.83537	6.40409	6.82429	7.36895	7.45659	7.43427	7.02329	7.27915	6.86821
2610020O08RIK	9.32971	9.76043	9.46933	8.93154	8.94825	8.63114	9.44805	9.48748	9.66837
2610021K21RIK	6.07229	6.25534	6.1045	5.99947	6.0146	6.08094	6.14833	6.22799	6.28778
2610022G08RIK	6.18004	6.15839	6.24071	5.8971	5.64721	5.7533	5.68554	5.82112	5.97198
2610022K04RIK	8.70768	8.42888	8.54356	8.78351	8.58859	8.51939	8.49204	8.61465	8.59891
2610024G14RIK	8.2279	8.15432	8.14315	7.79841	7.97448	8.03571	8.19235	8.26527	8.07353
2610025M23RIK	5.95263	5.82619	5.71295	5.69439	5.48055	5.75013	5.63915	5.7547	5.67239
2610027C15RIK	7.46641	7.09762	7.50174	7.4062	7.31497	7.18808	7.39766	7.38841	7.51126
2610027L16RIK	5.70724	6.02776	6.18659	7.06344	7.01365	7.1975	6.65397	6.41754	6.5908
2610027O18RIK	5.72838	5.91038	5.94126	5.60682	5.65053	5.61854	5.61465	5.70774	5.83592
2610028H24RIK	5.95076	5.75843	6.05134	5.77744	5.68791	5.59755	5.63117	5.61846	5.73734
2610028L19RIK	8.56722	8.50471	8.55138	8.27387	8.42188	8.35292	8.89139	8.73657	8.69329
2610029D06RIK	7.87071	7.89141	7.76201	7.55261	7.33899	7.33786	7.4773	7.64782	7.43193
2610029G23RIK	7.85418	7.99307	8.08097	7.3855	7.7721	7.83401	7.82062	7.68926	7.7061
2610029K21RIK	6.348	6.1902	6.29575	7.05641	7.32803	7.52985	6.58459	6.74211	6.50832
2610031L17RIK	8.37998	8.21195	7.35783	9.3002	9.11582	9.15068	9.33438	8.88764	9.08829
2610033C09RIK	8.88459	8.68029	8.70646	8.37504	8.28992	8.38346	8.50109	8.57125	8.5414
2610033H07RIK	7.71693	7.73948	7.66264	8.48318	8.56722	8.56936	8.21074	8.36754	8.43972
2610034B18RIK	5.74747	5.62751	5.67874	5.54741	5.62164	5.70256	5.67995	5.45422	5.68866
2610034E13RIK	6.04874	6.05547	6.04982	5.94011	5.94982	6.01747	5.88905	5.8666	5.93238
2610034H20RIK	6.23784	6.32548	6.20581	5.96637	5.92706	6.12292	6.37155	6.14427	6.278
2610034M16RIK	6.43094	6.11084	6.75691	5.86269	5.80981	5.80738	5.78988	5.69682	5.77287
2610034N03RIK	5.72638	5.76614	5.64867	6.01316	6.16306	6.12553	6.02571	5.89138	6.18771
2610034N24RIK	8.95853	8.62125	9.33556	8.51609	8.44794	8.34754	8.89214	8.95265	8.81609
2610036D13RIK	7.71439	7.46517	8.01469	7.22676	7.22829	7.24874	7.91929	7.66064	7.82931
2610037M15RIK	5.57068	5.54796	5.80458	5.46762	5.62641	5.44496	5.70963	5.57984	5.78301
2610039C10RIK	10.602	10.529	10.8467	10.1352	10.3234	10.315	10.8333	10.255	10.3471
2610039E05RIK	7.31307	7.38112	6.72161	7.38743	7.2596	7.14869	7.47048	6.97865	7.20526
2610040E16RIK	6.62658	6.72738	6.8285	6.1041	6.17989	6.16469	6.2933	6.54448	6.48064
2610041P08RIK	9.47477	9.09323	8.82668	11.1279	11.0346	10.8467	10.1844	10.4801	10.4494
2610042L04RIK	5.80662	5.82139	5.57593	5.83354	5.8147	5.85464	5.63399	5.84475	5.6755
2610042O14RIK	6.00659	6.1895	6.21128	6.24304	6.31866	6.24007	5.80154	6.69349	6.47669
2610044O15RIK	6.92891	6.98695	7.51283	7.79624	7.62773	7.66442	7.33786	7.48314	7.56597
2610101N10RIK	10.1633	10.2968	10.2121	9.9777	9.82933	10.1367	10.1071	10.1987	10.0998
2610103J23RIK	9.0378	9.16287	8.80197	9.31171	9.37152	9.45058	8.94825	8.87274	8.82389
2610109H07RIK	5.69664	5.70029	5.7111	5.86246	5.99622	5.87992	6.01725	5.86909	5.87957
2610110G12RIK	5.70085	5.83717	5.62149	5.85279	5.81737	5.85875	5.61126	5.8887	5.74304
2610111M03RIK	7.59524	7.75348	7.86644	7.59984	7.63197	7.67121	7.50035	7.74469	7.50124
2610200G18RIK	5.81136	5.62608	5.73409	5.53581	5.63128	5.5786	6.08809	5.65179	5.62214
2610203E10RIK	7.65268	7.52603	7.85563	7.23408	7.05003	7.32803	7.27725	7.29329	7.3869
2610204K14RIK	7.01365	6.88259	7.3626	7.4389	6.88042	7.2443	6.93828	7.24141	7.02381
2610204L23RIK	8.17221	8.37301	8.62916	7.99003	7.97513	7.86607	7.96424	8.14598	8.05002
2610204M08RIK	5.75564	5.87075	5.78887	5.8516	5.87132	5.82436	5.79685	5.92862	5.52771
2610205E22RIK	6.44996	6.3634	5.82951	6.5364	6.53731	6.57147	6.72494	6.55557	6.86128
2610205H19RIK	6.99966	7.29871	6.62897	7.85086	8.03427	7.79402	7.35133	7.25781	7.52603
2610206B13RIK	7.91527	7.91371	8.06491	7.97701	8.25691	8.32622	8.01085	8.12778	7.65707
2610207I05RIK	11.6768	11.8461	11.8145	10.9967	10.703	10.8062	10.5022	11.4616	11.0863
2610207I16RIK	5.79429	5.75687	5.9284	5.70171	5.79749	5.69113	5.80799	5.68388	5.83705
2610208M17RIK	7.7901	7.57425	8.14598	7.0882	7.09363	7.04694	7.74823	7.70565	7.77029
2610209A20RIK	5.84973	5.63134	5.79317	5.99969	5.9252	5.94547	5.75186	5.98926	5.89856
2610209M04RIK	7.61414	7.67191	7.89077	8.31973	8.26235	8.25691	7.93612	7.99072	7.83608
2610209N15RIK	5.99626	5.97298	5.88389	6.20847	6.25397	6.42439	5.96007	6.22011	5.68829
2610300B10RIK	9.80069	10.1529	10.7008	9.62991	9.96588	9.87925	10.2885	10.4387	10.5316
2610301B20RIK	6.12431	6.56842	6.15944	6.00887	6.16535	6.01408	6.37018	6.20254	6.33974
2610301F02RIK	5.82457	5.8	5.47146	6.27976	6.0287	6.09214	5.75819	5.93664	6.16027
2610304F09RIK	9.45607	9.10474	8.32411	8.66914	8.65059	8.62208	9.10385	9.2638	9.28594
2610304G08RIK	8.38759	8.26852	7.77614	8.62328	8.40573	8.36251	8.70098	8.56133	8.78524
2610305D13RIK	6.11107	6.01215	6.48151	5.90538	5.7703	5.96889	5.89546	6.45064	5.95535
2610311I19RIK	5.6952	6.01761	5.81741	6.65508	6.73627	6.69182	6.54522	6.29396	6.17811
2610312B22RIK	9.90087	9.96508	10.2509	10.1265	10.0628	10.0617	10.302	10.0807	9.95722
2610318C08RIK	7.11473	6.71756	7.31047	7.23149	7.62547	7.44909	7.69359	7.54866	7.61607
2610318G18RIK	7.17794	7.35573	6.83482	7.90758	7.71439	7.87847	7.7822	7.33247	7.46404
2610318I01RIK	7.15075	7.35827	8.00701	5.78657	6.02009	5.79648	6.69067	7.31497	6.56605
2610318I18RIK	7.01396	6.92759	6.96418	7.06262	7.04297	6.96092	6.62621	6.68165	6.65854
2610318N02RIK	6.20497	6.28967	6.27934	6.22859	6.44832	6.37018	6.42547	6.48861	6.48548
2610319K07RIK	7.78723	7.91564	7.85507	6.88903	6.87291	7.00851	8.16916	7.47887	7.73185
2610507B11RIK	8.9577	8.63345	7.76659	9.06698	8.85412	8.99149	8.72994	9.213	9.3002
2610507L03RIK	6.52783	6.85121	7.28585	6.76588	6.82654	6.84277	6.72609	7.12835	6.76684
2610510B01RIK	5.87762	6.04483	5.85905	5.65654	5.82553	5.78738	5.49996	5.72638	5.66957
2610510D13RIK	6.73491	6.75006	6.96758	6.96303	7.06307	6.79563	6.19737	7.00489	6.65275
2610510H01RIK	5.797	6.23979	5.74086	6.15503	6.18919	6.1045	6.08868	6.01975	5.92644
2610510H03RIK	5.75627	5.74908	5.53084	5.87075	5.70618	5.84037	5.73202	5.75438	5.82773
2610510J17RIK	7.84673	8.09805	8.08195	7.2451	7.69989	7.52562	8.13421	8.05866	8.24576
2610510L01RIK	8.77415	8.59829	9.08781	7.77029	8.29591	8.02253	9.26303	8.05473	8.37943
2610511E22RIK	6.69307	6.3969	6.04063	6.41713	6.51879	6.54314	7.03803	6.90209	6.93631
2610511O17RIK	7.88521	7.87191	8.03601	8.04433	8.53118	8.71332	8.56936	8.43419	8.47293
2610524A10RIK	5.67354	5.64047	5.67595	5.95084	5.87902	5.99474	6.02489	6.11206	5.7073
2610524G07RIK	11.2555	11.1985	11.3597	10.9388	10.9921	11.0113	11.1677	11.1118	10.9779
2610524H06RIK	7.22493	6.67576	7.28899	6.42837	6.45849	6.61451	6.63606	6.81645	6.37866
2610528A15RIK	10.3068	10.4017	10.1476	10.2885	10.2423	10.1903	10.3378	10.4126	10.3525
2610528E23RIK	6.49387	6.58416	7.03983	7.12803	7.26615	7.52444	7.46517	6.99414	6.30085
2610528H13RIK	6.59191	6.65198	6.31873	6.88299	6.90724	6.85164	6.89324	6.85164	6.8982
2610528J11RIK	6.00209	5.57749	5.88669	5.55446	5.58067	5.6814	5.5851	5.62661	5.49513
2610528K11RIK	7.71724	7.26356	7.5546	7.71007	7.15228	7.60035	6.23935	8.05432	7.83217
2610528M18RIK	8.5122	8.30442	8.75247	8.94509	8.88764	9.06026	8.6479	8.73406	8.69078
2610528O22RIK	9.09152	9.04926	9.0403	9.30292	9.2638	9.24192	8.5167	9.09603	9.16224
2610529C04RIK	5.61743	5.98435	5.56156	5.96661	6.00371	5.80823	5.86037	5.7689	5.57218
2610529H08RIK	6.04556	5.89694	5.73453	5.9322	6.10838	5.98094	6.31712	5.90816	6.07601
2700007P21RIK	7.1412	7.34364	7.61573	6.71556	6.74073	6.69585	6.88778	6.82469	6.93678
2700008N14RIK	6.81984	6.80777	6.24934	6.3641	6.21446	6.29772	6.72091	6.28068	6.81305
2700017M01RIK	9.98275	9.65183	10.0193	9.66525	9.78554	9.69338	9.64054	9.84973	9.74279
2700019D07RIK	5.74832	5.46784	5.62128	5.6017	5.75737	5.63488	5.69217	5.62879	5.78931
2700022J23RIK	5.57004	5.66973	5.69357	5.48172	5.43669	5.62013	5.63565	5.61707	5.77744
2700023B17RIK	10.0576	10.1099	9.84875	9.94511	9.97985	9.99483	10.1386	10.3554	10.2181
2700029E10RIK	8.22204	8.40438	8.57422	8.28574	8.00589	7.84574	7.67584	8.46814	7.73468
2700038C09RIK	8.70001	8.45786	8.5491	8.70098	8.6891	8.63038	9.07285	8.31973	8.482
2700038I16RIK	8.7021	8.77701	8.82326	8.55933	8.46471	8.23085	8.37753	8.66963	8.63114
2700038L12RIK	8.07631	7.61901	7.91371	8.5215	8.42252	8.50789	7.88953	7.77852	7.98501
2700038N03RIK	6.03069	6.10422	6.20838	6.16666	6.09122	6.08691	6.10219	5.94833	5.90493
2700049P18RIK	5.75118	6.07702	5.86365	5.94645	5.98086	6.03319	6.00887	6.04697	6.10367
2700050C12RIK	8.0759	5.84331	5.76806	5.72869	5.80045	5.72935	8.32149	5.75304	8.4707
2700050F09RIK	6.70147	6.97514	7.43678	7.18164	7.07212	7.073	7.07798	7.34681	7.05431
2700050L05RIK	7.57425	7.75187	7.5852	7.64985	7.57866	7.581	7.46357	7.8117	7.59233
2700050P07RIK	7.63197	7.58272	7.54222	7.16933	7.12803	7.36524	7.54961	7.51283	7.75957
2700055A20RIK	8.13301	8.60262	7.63106	8.87912	8.89774	8.93154	8.71759	8.48913	8.58017
2700055K07RIK	5.9732	6.1041	5.94225	5.63385	5.72224	5.64045	5.56574	5.7994	5.74823
2700059L22RIK	5.63963	5.79366	5.60263	5.69659	5.5921	5.53513	5.60769	5.78828	6.09532
2700060E02RIK	11.8685	11.6703	12.1213	11.7822	11.8048	11.8048	12.1411	12.0303	11.9578
2700062C07RIK	7.23896	7.37911	7.75286	7.32321	7.3259	7.33712	7.61176	7.52953	7.25846
2700063G02RIK	5.76699	5.70889	5.86701	5.90668	5.89688	5.94868	5.76128	5.75753	5.87967
2700067E09RIK	10.792	10.9872	10.6956	11.263	11.2519	11.1823	9.67614	11.5269	10.9001
2700075B01RIK	6.54219	6.42717	6.13812	6.18428	6.30009	6.26534	6.32746	6.17705	6.41069
2700078K21RIK	7.27148	7.14298	6.6269	6.9662	6.83807	7.0291	7.09937	6.94258	7.45712
2700081O15RIK	7.35308	7.25587	7.55062	7.46819	7.64534	7.47048	6.83165	7.45012	7.29843
2700082D03RIK	10.4843	10.7246	11.022	10.2194	10.1352	10.2009	10.4574	10.3353	10.5536
2700083E18RIK	7.41358	7.24671	7.22493	6.65989	6.73988	6.55969	7.0103	7.34469	7.18537
2700084L06RIK	10.5022	10.2664	10.5823	9.73575	9.5592	9.30292	10.1987	10.2194	10.4616
2700084L22RIK	7.25927	7.48255	8.07525	8.12955	8.52572	8.1888	8.12274	7.82665	7.84849
2700085E05RIK	6.08247	6.15452	6.07168	6.29937	6.40977	6.37099	6.40115	6.34249	6.17831
2700085M18RIK	6.7845	6.98927	6.63976	7.13426	7.31469	7.1405	7.3481	7.15358	7.44909
2700087H15RIK	9.09769	8.89059	9.23244	9.20385	8.99149	9.02648	8.06892	9.17208	8.68736
2700088M22RIK	8.95265	9.26833	8.47612	9.3482	9.45976	9.52364	9.22078	8.73498	8.64499
2700091N06RIK	7.19829	7.43928	7.84316	6.69895	6.88975	6.87177	6.68834	6.87628	7.09597
2700094F01RIK	7.43193	7.45998	7.41171	7.18929	7.28395	7.32836	7.5721	7.40444	7.52562
2700094K13RIK	11.176	11.6434	11.7493	11.3022	11.7772	11.8249	12.0303	11.5886	11.9033
2700094L05RIK	8.21791	8.06314	7.40841	8.56829	8.58017	8.5215	8.83699	8.70768	8.68104
2700097O09RIK	8.30285	8.29348	8.86238	8.00841	8.25655	8.75247	7.9988	8.3727	8.06384
2810002G02RIK	6.08651	6.18097	6.02642	6.34168	6.4739	6.33505	6.00506	5.89943	6.08341
2810002I04RIK	5.89346	5.72806	5.59079	5.748	5.86961	5.75209	5.70489	5.66052	5.61407
2810002N01RIK	7.90833	7.7927	7.98681	7.8058	8.12274	8.17493	7.86399	7.66178	7.70793
2810002O09RIK	6.49215	6.3283	6.17989	6.29921	6.17196	6.31341	6.41174	6.28164	6.60364
2810003C17RIK	6.09079	5.749	5.77282	5.86559	5.74408	5.76241	5.97111	5.81839	5.88687
2810004A10RIK	5.6429	6.01248	5.89121	5.49755	5.58847	5.40753	5.81647	5.73497	5.88684
2810004N20RIK	7.91829	8.05798	7.33285	7.46035	7.81297	7.96225	8.18656	7.54539	7.74399
2810004N23RIK	6.19173	6.332	6.04001	6.33742	6.46389	6.51478	6.44653	6.13914	6.01472
2810006K23RIK	5.98668	6.00244	5.49785	5.76023	5.47927	5.7432	5.50347	5.21569	5.6062
2810007J24RIK	5.65922	5.62444	5.59195	5.54548	5.5935	5.39068	5.88401	6.03043	5.591
2810008M24RIK	9.22078	9.01734	9.15956	8.482	8.65847	8.52938	9.10831	8.68736	8.80676
2810012G03RIK	8.48854	8.67701	8.6269	8.34585	8.25065	8.36487	8.18326	8.79653	8.42685
2810012L14RIK	6.96698	6.45766	7.17584	7.23934	7.19665	7.01601	6.97865	7.46121	7.13426
2810021B07RIK	8.34532	8.96304	9.3596	8.69078	8.83997	8.63397	8.28227	9.10474	8.74807
2810021J22RIK	6.85032	6.98204	7.12111	6.53234	6.2723	6.29937	5.97463	6.73561	6.76785
2810021O14RIK	10.2894	10.4322	10.1306	10.2675	10.2935	10.0868	10.3185	10.4093	10.1844
2810022L02RIK	7.68588	7.63106	7.74613	7.32128	6.86721	7.17667	6.84855	7.70864	6.91356
2810022L20RIK	5.70055	5.73147	5.78847	5.8476	6.09795	5.92867	5.72908	5.71018	5.76849
2810028N01RIK	6.31134	6.72678	5.96123	6.86349	7.23727	7.30653	7.00721	7.01296	7.12646
2810030E01RIK	6.24497	6.51384	6.90579	5.8074	5.98102	5.83951	5.70117	5.61687	5.90274
2810036L13RIK	9.61974	9.73915	9.74633	8.95198	9.25824	9.16882	9.48421	9.73141	9.4709
2810037C03RIK	10.222	9.93013	10.4211	9.82525	9.86424	9.81562	10.2664	9.87338	9.89563
2810037C14RIK	8.63502	8.95265	8.61595	9.90925	9.69438	9.94274	9.37152	9.49776	8.76513
2810038K19RIK	7.5362	7.51876	8.00873	7.38795	7.09262	7.1632	6.85226	7.87847	7.581
2810039F03RIK	5.87532	6.3287	6.02618	5.8048	5.66596	5.82122	5.99424	5.61233	5.85616
2810046L04RIK	9.89323	10.0907	10.0947	9.24312	9.213	9.12247	9.5917	9.82041	9.67801
2810046M22RIK	5.87481	6.03984	6.30301	5.93172	5.88001	5.91966	5.79065	5.83198	5.7098
2810047L02RIK	6.16195	6.51336	6.31679	6.16535	6.11352	6.16777	6.06569	6.09869	6.09631
2810048G17RIK	5.85384	5.84244	5.79673	5.92982	5.80272	5.63624	5.66141	5.69729	5.87709
2810052M02RIK	5.75464	5.97494	6.27043	5.71993	5.86643	5.82267	5.60546	5.48293	5.61292
2810055E05RIK	7.92145	7.87338	7.95529	8.02733	8.15189	8.0203	8.20407	7.90694	7.67584
2810055F11RIK	5.60061	5.78097	5.67758	5.55251	5.58386	5.84894	5.89432	5.79366	5.70897
2810402A17RIK	5.61676	5.86418	5.84284	5.73063	5.77147	5.76991	5.94415	6.21675	5.76052
2810403A07RIK	11.2601	11.4657	11.2828	11.1464	10.8228	10.9151	10.2079	11.2695	10.9631
2810403P18RIK	6.22285	6.23449	5.91965	6.02876	6.15568	6.10944	6.53818	6.19641	5.98625
2810404F18RIK	6.6563	6.93079	6.54465	7.16408	7.08451	6.99941	7.23473	7.03848	7.03928
2810405F18RIK	9.54823	9.32359	9.79719	9.33506	9.13471	9.08676	8.77212	9.24192	9.10831
2810405I11RIK	11.2144	11.2191	10.804	10.6662	10.3727	10.3525	10.3801	10.5536	10.6194
2810405J04RIK	9.89709	9.37454	9.48249	9.72228	9.74279	9.78721	9.6004	9.73915	9.5917
2810405K02RIK	5.77113	5.94678	5.93249	5.78784	5.92228	5.83948	5.76086	5.76099	5.79021
2810407K09RIK	6.95382	6.65487	7.08451	6.70118	6.60506	6.59004	6.99003	6.48104	6.63438
2810408A11RIK	6.12313	6.39669	6.32604	6.40771	6.40821	6.49459	6.52818	6.51497	6.55885
2810408E11RIK	6.19873	5.97851	6.15218	6.07195	6.11897	6.11669	5.95854	6.19528	6.19075
2810408M09RIK	6.52902	6.38499	6.71311	6.35896	6.52481	6.54555	6.78145	6.57688	6.37582
2810409H07RIK	7.11368	7.08311	7.21248	7.08417	7.45183	7.45404	7.40057	7.24199	7.28344
2810410C14RIK	5.94523	5.81548	5.79471	6.04183	5.99424	5.9768	5.99129	5.85892	5.86473
2810410M20RIK	9.93516	10.0766	10.3833	9.78721	10.2066	10.1664	10.5316	10.2645	10.4661
2810410P22RIK	6.49252	7.07763	6.68532	7.08311	6.98846	6.97391	6.43958	7.06766	6.81001
2810413I22RIK	8.81127	9.08496	9.33506	8.3252	8.2882	8.31973	8.3373	8.62125	8.6479
2810416G20RIK	5.81133	5.69703	5.70969	5.75016	5.741	5.79697	5.83732	5.79641	5.81684
2810417D08RIK	5.8425	5.7108	5.70433	5.73365	5.68786	5.77533	5.67019	5.78551	5.82846
2810417H13RIK	9.46845	9.49866	9.70911	8.72837	9.46933	9.72228	10.1237	9.81892	10.2235
2810417J12RIK	6.56543	6.45092	6.61189	6.15207	6.13954	6.12821	6.4349	6.09487	6.57708
2810417M05RIK	6.14966	6.18527	6.4599	5.86035	5.97771	5.89985	5.73092	5.7169	5.73441
2810422B04RIK	6.95795	6.64836	6.59654	7.76323	7.81602	7.93099	7.12886	7.43637	7.44855
2810422O20RIK	6.46827	6.58824	6.3588	6.31371	6.64899	6.60183	6.17848	6.43242	6.21472
2810423E13RIK	6.96376	7.2451	7.10707	7.3259	7.06183	7.03571	7.13899	7.45744	7.5052
2810423O19RIK	5.67318	6.01441	5.94066	5.67129	5.56834	5.79061	5.85541	5.66018	5.90158
2810426N06RIK	5.91807	5.92243	6.00074	5.94472	5.8512	6.04634	6.05737	5.78076	5.81241
2810427I04RIK	6.01273	5.98654	5.83762	6.21462	5.97979	6.0521	6.15075	6.0091	6.22011
2810428C21RIK	7.26055	7.19318	6.44137	7.55062	7.60654	7.65707	7.33181	7.2437	7.25608
2810428I15RIK	8.30117	8.31401	8.65937	8.35493	8.89214	8.72312	9.35868	8.61283	8.9577
2810429K17RIK	5.86358	5.88807	5.97111	5.72879	5.72842	5.65343	6.01017	5.70349	5.55745
2810430M08RIK	7.48839	7.21558	7.39012	7.14204	7.4507	7.79665	7.73672	7.36408	7.45499
2810432D09RIK	9.9185	9.54128	10.0013	9.48249	9.38508	9.30185	10.0617	9.37744	9.55283
2810432L12RIK	6.05814	5.75807	6.18305	5.86981	5.91056	5.99403	6.20773	6.1363	5.78185
2810433K01RIK	5.79198	5.7478	5.69049	5.94313	5.90528	5.7962	5.75946	6.07466	5.89227
2810437L13RIK	9.31136	9.25514	9.77774	8.75566	8.73657	8.73498	9.33506	9.02408	8.96674
2810439F02RIK	5.74683	5.76186	5.80599	5.85817	5.80259	5.85705	5.86195	5.78384	5.82765
2810439K08RIK	6.5548	6.47453	6.51232	6.20064	6.30396	6.17956	6.40497	6.4696	6.51358
2810439M11RIK	6.65592	6.43293	6.43172	6.85496	6.84424	7.06344	6.56297	6.63776	6.65067
2810441C07RIK	6.15472	5.84522	5.92383	5.87658	5.9732	5.98206	5.75199	5.7161	5.66058
2810441K11RIK	7.40479	7.01745	7.36848	7.1589	7.35398	7.21486	7.12193	7.07261	7.03635
2810441O16RIK	6.52869	6.17416	6.30608	7.55771	7.64003	7.38259	6.98277	7.09038	7.09654
2810442O16RIK	9.00111	9.22273	9.08829	8.97932	8.69078	8.74309	7.79739	8.09463	8.04135
2810446P07RIK	6.68729	7.01899	6.59682	7.3245	7.13426	7.09262	6.40179	6.90951	6.94169
2810452K22RIK	7.35398	7.42733	7.77871	6.95444	7.23983	7.2596	7.93426	7.26882	7.41933
2810453I06RIK	6.10597	6.07141	6.01884	6.39125	6.31749	6.43958	6.40714	6.32548	6.23528
2810453K03RIK	7.39933	7.34212	7.8117	7.32729	7.74198	7.56231	7.84968	7.63523	7.87338
2810453L12RIK	7.64337	8.11466	7.90067	7.18277	7.07798	7.01006	7.46467	7.52603	7.29358
2810457I06RIK	5.99622	5.79893	6.00289	5.75803	5.90851	5.76071	5.94927	5.85699	5.7146
2810457M08RIK	6.98551	6.95173	6.7845	7.49899	7.39616	7.50765	6.88573	7.11662	7.23896
2810465F10RIK	5.60263	5.76976	5.62506	5.73505	5.56411	5.81435	5.9113	5.78421	6.12926
2810468K17RIK	7.05873	7.07837	7.05241	6.89641	6.76268	6.81265	6.79701	7.12423	7.12049
2810470D21RIK	6.74211	6.73073	6.54649	6.75148	6.70387	6.82503	6.25109	6.4549	6.85269
2810471M23RIK	5.73602	5.83913	5.70036	5.3416	5.61435	5.45652	5.69246	5.733	5.63541
2810475A17RIK	8.06433	8.42685	8.39939	8.4943	8.64198	8.70401	8.50651	8.5122	8.40866
2810481F14RIK	7.3481	7.69382	7.49754	7.34102	7.32702	7.3341	6.32294	7.43589	7.61099
2810484M10RIK	5.61421	5.82739	5.73599	5.77063	5.67611	5.83226	5.737	5.77492	5.64908
2810485I05RIK	10.7589	11.022	11.0521	10.2454	9.95399	9.99294	9.707	10.4599	10.65
2900001O04RIK	7.56177	7.44154	7.209	7.35367	7.44116	7.30891	7.77666	7.64951	7.48839
2900002H16RIK	6.32887	6.36716	5.90544	6.02119	6.04235	6.0146	6.4265	6.29707	6.24719
2900006K08RIK	6.4294	6.59485	6.62734	6.64193	6.64006	6.43036	6.2954	6.83324	6.87946
2900009I07RIK	5.60755	5.52412	5.79512	5.67799	5.48919	5.50303	6.10761	5.65238	5.88945
2900010D03RIK	9.5682	9.24312	9.52182	9.15956	9.05079	9.03358	9.349	9.39628	9.15904
2900010J23RIK	5.83222	5.88879	5.71502	6.50704	6.83324	6.54417	6.65218	6.39669	6.34931
2900010M23RIK	10.0766	10.1237	10.3224	10.7172	11.1068	11.2144	10.9446	10.5973	10.5342
2900011O08RIK	6.10846	6.1363	5.92536	6.16469	6.23935	6.10563	6.09954	6.29759	6.26188
2900016D05RIK	7.12049	7.17845	7.55332	7.11765	7.16284	7.0892	7.13084	6.94201	7.19274
2900024C23RIK	6.62304	6.65508	6.61318	6.08145	6.2198	6.2198	6.69613	6.60641	6.46788
2900024O10RIK	7.48591	7.77472	7.81968	6.83053	6.66498	6.58036	7.17794	7.15734	7.16689
2900026A02RIK	5.99184	6.07594	5.8523	5.83033	5.91692	5.8796	5.90199	5.90944	5.73428
2900026H06RIK	5.90628	5.82649	5.79354	5.57187	5.48293	5.80887	5.72073	5.55714	5.39428
2900041A09RIK	5.67864	5.92106	5.69505	5.88298	5.88982	5.83879	6.06246	5.94383	6.18149
2900042E01RIK	5.88284	5.65351	5.87652	5.71439	5.79947	5.71769	5.97093	5.79284	5.79449
2900045N06RIK	7.64208	7.38259	6.68656	7.66898	7.34929	7.29791	6.8588	7.22386	7.49754
2900046G09RIK	6.48411	5.98639	5.75617	6.11238	6.01922	6.01872	5.86961	6.39022	6.27137
2900054P12RIK	6.04963	6.02295	5.79793	5.8981	5.86852	5.93006	5.86571	5.96123	5.6017
2900055D14RIK	6.57941	6.72885	7.1163	6.20397	6.37078	6.29852	6.45276	6.63528	6.5364
2900057D21RIK	9.36982	9.68674	10.0326	9.06616	9.05546	8.89804	9.06336	9.3548	9.37565
2900064A13RIK	7.85765	7.86001	8.09606	9.16792	9.33363	9.22008	8.71221	8.39684	8.299
2900070E19RIK	9.76162	9.76595	9.90597	9.97985	10.1161	10.3056	10.3975	9.82525	9.89806
2900073G15RIK	6.83294	6.91991	6.85641	6.65067	6.88669	6.58582	7.03928	6.7983	6.76405
2900073H19RIK	7.05395	7.06307	7.13899	6.5553	6.52869	6.50832	6.7473	7.09552	7.09895
2900092C05RIK	5.93504	5.83482	6.21708	5.74669	5.47133	5.6889	5.77758	5.62682	5.75837
2900093B09RIK	5.84244	5.89	6.11084	5.65327	5.79961	5.71455	5.86265	5.80666	5.85328
3000002G13RIK	6.06279	6.26264	5.87658	5.99074	5.96094	5.98435	5.72466	5.93531	5.77849
3000003F02RIK	7.89781	7.92089	7.88427	8.43343	8.48997	8.42447	7.8325	7.961	7.84596
3000004C01RIK	7.72976	8.0692	8.09371	7.39985	7.93376	7.82037	8.42685	8.19311	8.34754
3000004N20RIK	6.18919	5.85501	5.96406	6.04832	6.04963	5.98842	5.93172	6.38737	5.9851
3010001K23RIK	6.18015	6.4407	6.29852	6.78325	6.76588	6.87715	6.54314	6.53914	6.81413
3010003L21RIK	6.06584	5.748	5.83236	5.88556	5.90703	6.14231	6.19059	6.22141	6.08966
3010019O03RIK	5.85973	5.87374	6.13445	6.11612	6.0722	6.10422	5.66998	5.62751	5.5202
3010026O09RIK	7.28344	7.34681	7.83084	6.85139	7.01745	6.96758	7.6946	7.19318	7.39012
3010033P07RIK	13.482	13.4134	13.349	13.4971	13.4971	13.4505	13.377	13.2919	13.2647
3100004P22RIK	10.0976	9.93516	9.73141	9.89806	9.79901	9.82933	10.2515	9.8917	10.1071
3110001A13RIK	9.25446	8.95198	8.74807	8.54217	8.23961	8.35493	8.27908	8.50567	8.75353
3110001D03RIK	10.8318	10.9902	11.151	10.7371	10.8707	10.7632	11.2432	10.786	11.0456
3110001H15RIK	7.16966	7.71082	7.29329	7.64269	7.78825	7.7721	7.59984	7.45791	7.35278
3110001I22RIK	5.97412	5.61822	5.54382	5.75948	5.677	5.71634	5.70141	5.591	5.90409
3110001N18RIK	7.12228	6.84462	6.85139	8.66454	8.82668	8.94017	8.19399	7.6946	7.76046
3110002L15RIK	8.14315	8.36374	8.18537	7.81139	7.72785	7.8247	7.64052	8.19	8.03366
3110003A22RIK	5.90923	5.87231	6.05828	6.11403	6.11654	6.16908	6.21873	6.23721	6.27147
3110004H13RIK	7.24199	7.11547	7.1632	7.41199	7.4528	7.3869	7.51876	7.22441	7.43543
3110004L20RIK	5.90339	5.8398	5.95676	5.74496	5.8101	5.79559	5.84515	5.86762	5.74023
3110005G23RIK	7.85563	7.73093	7.18465	8.29319	8.06314	8.21525	8.40866	7.52803	7.67087
3110006P09RIK	6.06169	5.97132	6.27171	6.1222	6.23665	6.21333	5.91264	5.82846	5.78845
3110007F17RIK	6.47453	6.60564	6.95382	5.96799	6.27779	6.16881	6.84	6.52	6.47258
3110007P09RIK	5.7168	5.8542	5.76983	5.85518	5.82368	5.86701	5.96422	5.92832	5.89181
3110009E18RIK	9.40611	9.27447	9.77869	8.75883	8.92845	8.97932	9.28152	9.15446	9.06164
3110010F15RIK	6.24736	7.06129	6.79563	7.18661	6.79781	6.9244	6.21282	7.14562	7.64052
3110018K12RIK	9.22664	9.22873	9.34694	8.74309	8.79811	8.95198	8.74958	9.29015	9.12498
3110023B02RIK	7.25608	7.3695	7.49331	7.5475	7.33122	7.38777	6.88259	7.4773	7.4313
3110023G01RIK	5.89915	5.84539	5.69179	5.70847	5.4597	5.63358	5.65937	5.59773	5.60643
3110024A21RIK	6.05064	5.93348	6.09869	6.74463	6.69895	6.68165	6.75293	6.71663	6.35804
3110031B13RIK	7.09992	7.16284	6.49606	8.03571	7.67771	7.75957	7.19095	7.32702	7.17354
3110032G18RIK	5.90617	5.7345	5.73376	5.80228	5.85204	5.68694	5.84512	5.69413	5.91284
3110035E14RIK	5.8285	5.68768	5.78225	5.78615	5.90173	5.85235	5.93144	5.76775	6.02897
3110037I16RIK	7.40841	7.66105	7.45998	7.44293	7.44909	7.47605	8.03685	7.78914	7.69818
3110040N11RIK	7.54961	7.43166	7.65379	7.30984	7.34753	7.54677	7.88786	7.571	7.4828
3110043J09RIK	5.86909	5.72406	5.74769	5.88031	5.85916	5.92764	5.85626	5.77011	5.86047
3110045G13RIK	5.77151	5.73628	5.68829	5.657	5.7282	5.68404	5.70225	5.74971	5.79961
3110048E14RIK	5.9201	5.81503	5.91888	5.93504	5.88835	5.87369	6.00515	5.97781	6.0008
3110049J23RIK	5.92886	5.93222	5.87755	6.28098	6.19557	6.26638	6.049	6.04832	5.97177
3110050K21RIK	6.65923	6.85641	6.24034	6.92759	7.01499	6.95795	7.44496	7.14475	7.19035
3110050N22RIK	6.282	5.9448	6.1175	5.95236	5.86734	5.95003	6.10658	5.71842	5.82608
3110052N05RIK	6.84945	6.53093	6.42763	6.42103	6.56297	6.55909	6.90579	6.84637	6.61318
3110056O03RIK	8.37943	8.56083	8.85913	8.77575	8.64124	8.62125	8.01258	8.35347	8.11169
3110057O12RIK	7.34973	7.21711	7.61357	7.08203	7.01429	6.97159	6.81001	7.24726	7.35827
3110062M04RIK	6.10422	6.47692	6.49215	6.07934	6.08894	5.73899	5.72207	6.0387	6.11849
3110070M22RIK	5.92973	6.00162	5.92434	5.86191	5.76411	5.85351	5.90659	5.69561	5.56203
3110082I17RIK	6.61318	6.18504	6.283	5.98593	6.13265	6.05235	5.59564	5.78097	6.19792
3200001I04RIK	5.62879	5.70295	5.79209	5.45003	5.63614	5.69277	5.41896	5.43831	5.83644
3200002M19RIK	6.37454	6.75148	6.66596	6.80238	6.89557	7.12546	6.97028	6.87806	6.83165
3222401M22RIK	6.36621	6.18127	6.13739	6.08739	6.32982	6.38934	5.99922	6.5361	6.65708
3230401D17RIK	8.70401	8.482	9.49776	9.27175	9.25446	9.25446	9.33926	9.24569	9.19502
3230401I01RIK	6.77648	6.8341	7.22065	6.83914	6.95551	7.04067	7.06537	6.83511	6.86766
3300001G02RIK	9.52783	9.72922	10.0133	9.1279	9.47753	9.61512	10.529	9.64573	9.82823
3300001H21RIK	5.82843	5.89077	5.71002	5.74237	5.69526	5.66854	5.63453	5.59975	5.74701
3300001M20RIK	7.13676	7.0867	7.04667	7.48772	7.62935	7.67975	7.53366	7.16139	6.98032
3300001P08RIK	11.7533	12.134	12.1983	11.6513	11.4353	11.4189	11.0481	11.6703	11.5692
3300002I08RIK	5.79209	5.51001	5.54109	5.83057	5.74211	5.84338	5.71203	5.74304	5.82793
3321401G04RIK	5.6607	5.72735	5.91255	5.79418	5.81641	5.86775	5.96456	5.82047	5.83892
3322402L07RIK	5.63646	5.78738	5.87835	5.6254	5.59975	5.76131	5.7078	5.41568	5.76472
3526402H21RIK	5.6688	5.70733	6.07335	5.64921	5.49801	5.5838	5.82557	5.52484	5.52568
3632413B07RIK	8.43343	8.58422	8.45956	8.19753	8.12955	8.06052	8.38999	8.31219	8.35831
3632451O06RIK	5.78311	5.79284	5.99663	5.55014	5.69249	5.59958	5.79482	5.71439	5.66754
3732409C05RIK	6.21333	6.66907	6.46978	6.44443	6.40384	6.43987	6.43094	6.41784	6.4659
3732413I11RIK	10.8228	10.3964	9.86571	10.8545	10.7483	10.5251	10.5342	10.438	10.3105
3830402I07RIK	6.24795	6.57424	6.65218	6.57147	6.62734	6.51053	6.56661	6.27418	6.15586
3830403N18RIK	5.65343	5.74316	5.67712	5.74338	5.81348	5.8359	5.95638	5.72808	5.67452
3830405G04RIK	5.89	6.07389	5.90957	5.93952	5.88311	5.88401	5.82649	5.94119	5.74178
3830406C13RIK	7.28395	7.44026	7.56231	7.21679	7.28344	7.3599	7.67638	7.28654	7.58272
3830408P04RIK	7.96424	8.13571	8.14394	7.30196	7.2235	7.498	6.81305	7.5432	7.86149
3830417A13RIK	5.75837	5.6979	5.80588	5.72772	5.70195	5.58156	5.95391	5.97888	5.89341
3830421F13RIK	5.99909	5.86179	5.72922	6.01641	6.08385	6.15548	6.06935	6.00294	5.75829
3830422K02RIK	5.60048	5.71883	6.36803	5.82416	5.87254	5.76614	5.98247	6.05521	5.83004
3830422N12RIK	6.04001	5.99992	6.11679	5.7108	5.73977	5.78485	5.8936	5.71177	5.80541
3930401K13RIK	6.47541	6.2954	6.04215	6.35003	6.32691	6.40211	6.11582	6.27372	6.10171
3930402F13RIK	7.37816	7.15442	6.66498	7.97773	8.02861	7.88427	7.09363	7.62577	7.71641
4121402D02RIK	7.77506	7.64093	7.48739	8.04669	7.89141	7.91646	7.45404	7.62227	7.53515
4122402O22RIK	6.69349	6.68558	5.79206	7.07538	7.48868	7.43193	7.39713	6.81798	7.26184
425O18-1	5.81601	5.81813	5.87348	5.89008	5.94852	5.83787	5.78337	5.55652	5.67421
4430402I18RIK	5.84663	5.91972	6.37573	6.01408	5.89617	5.92027	5.6463	5.98562	5.78425
4430402O11RIK	8.11639	8.20757	8.11971	7.65549	7.54644	7.33366	7.11202	8.1029	8.10783
4432405B04RIK	5.89008	5.65638	5.71772	5.74216	5.66798	5.69602	5.83573	5.88324	5.77584
4432406C05RIK	8.15189	8.03571	8.36815	7.48868	7.43928	7.39985	7.8282	7.70832	7.83759
4432409M07RIK	10.0062	10.2645	10.0699	10.5473	10.0491	10.2664	9.22408	9.91659	10.0597
4432412D15RIK	5.61163	5.27056	5.69943	5.6082	5.53754	5.72861	5.98761	5.6157	6.01898
4432416J03RIK	5.79387	5.71971	5.72827	5.70337	5.69756	5.78021	5.67324	5.5792	5.92862
4631401E18RIK	5.62758	5.88612	5.68832	5.72633	6.04352	5.71698	5.53737	5.60296	5.43
4631402N15RIK	5.94594	5.86949	6.33805	5.82787	5.79535	5.84105	5.79691	6.08071	5.7833
4631403P03RIK	6.09142	5.84137	6.03855	6.1758	6.19173	6.16723	5.72181	6.00669	5.9929
4631404I11RIK	5.47306	5.60066	5.59244	5.89489	5.7411	5.96383	5.46922	5.48719	5.7263
4631422O05RIK	5.80527	5.97082	5.71257	5.8001	5.6044	5.53072	5.45813	5.57378	5.71695
4631423F02RIK	5.93948	5.79531	5.80901	5.6622	5.81046	5.83004	5.70855	5.68716	5.76979
4631426E05RIK	5.87986	5.91174	5.75092	5.65916	5.73153	5.80437	5.76779	5.75975	5.95257
4631426H08RIK	5.62102	5.99929	5.95752	5.878	5.61954	5.80811	5.23929	5.42919	5.5421
4631426J05RIK	6.0799	6.4349	6.68204	6.23134	6.28938	6.29575	6.78379	6.75293	6.77305
4631427C17RIK	6.60842	6.78477	6.18601	7.72785	7.86887	7.75145	7.37427	6.46451	6.70639
4632404H12RIK	6.56924	6.52743	7.01566	6.35553	6.30565	6.24603	5.93311	6.34351	6.30593
4632404H22RIK	7.4217	7.10167	7.74067	6.74579	6.9594	6.84151	7.39792	7.22603	7.17455
4632407F12RIK	6.02348	5.8099	5.62572	6.32724	6.28674	6.09821	5.63893	6.07335	5.7866
4632409L19RIK	6.93828	6.58542	6.85696	6.41301	6.18015	6.31504	6.40903	6.74631	6.70428
4632409L22RIK	6.7775	6.95487	6.95594	6.95724	6.95795	6.94115	6.39081	6.85378	6.88598
4632411B12RIK	8.70471	8.65996	9.01014	8.08327	8.05432	7.9699	8.03055	8.50259	8.34923
4632411J06RIK	5.89341	5.65356	5.95876	5.50732	5.58106	5.37578	5.58967	5.65166	5.34939
4632412E09RIK	5.88341	5.83868	6.00367	5.63346	5.57076	5.69609	5.80682	5.75723	5.78003
4632412N22RIK	5.79546	5.93703	5.93033	6.1544	6.20943	6.16566	6.33462	5.98736	6.52108
4632413K17RIK	9.2849	8.79563	8.74442	9.22154	9.06477	9.17717	8.84997	9.28785	8.93208
4632415K11RIK	6.93319	6.49027	6.14358	6.63606	6.49027	6.55859	6.72842	6.82719	6.38836
4632417D23	7.95795	8.52099	9.13181	7.9035	7.8107	7.83608	7.42029	8.14502	8.51472
4632417K02	6.4968	6.13012	6.20064	6.24736	6.26625	6.21873	6.22729	5.79966	6.11984
4632417K18RIK	8.24737	8.19311	8.94726	7.78109	8.06433	8.37998	9.57549	8.70401	9.33745
4632417N05RIK	5.81046	5.73684	6.31778	6.05601	6.01325	6.00391	5.53449	5.63144	5.57667
4632419I22RIK	6.03023	5.75677	5.76532	5.69737	5.68106	5.66962	5.87075	5.8423	5.65205
4632419K20RIK	7.64741	7.78053	7.8282	7.2685	6.69464	7.01161	6.53966	7.54602	7.75452
4632422M10RIK	5.84616	5.73059	5.94199	5.56741	5.5322	5.5976	5.71902	5.59605	5.7296
4632423N09RIK	5.72914	6.06258	6.00209	5.80977	5.72118	5.77976	5.66942	5.8516	5.69764
4632425D07RIK	6.03055	5.81762	6.14556	5.83387	5.74633	5.73392	5.81664	5.96111	5.64741
4632428M11RIK	7.16502	7.34412	7.5475	7.04228	6.98551	6.88084	7.04297	7.34364	7.03571
4632434I11RIK	6.718	6.46805	7.11473	5.98174	5.98263	6.06472	6.11761	6.44457	6.24612
4633402D15RIK	5.8564	5.77397	5.86534	5.78072	5.76347	5.86242	5.84453	5.64002	5.77752
4633402N23RIK	6.07839	6.01719	5.91851	6.13566	6.19609	6.20594	6.47564	6.22421	6.18108
4732406D01RIK	5.88495	6.0722	5.71023	5.54412	5.64054	5.77253	5.69315	5.64407	5.7482
4732407F15RIK	5.80889	5.68854	5.87543	5.9934	5.95101	5.99802	5.51899	6.05199	5.54906
4732415M23RIK	5.70162	5.68773	5.86135	5.76762	5.78809	5.89637	5.56284	5.72224	5.55297
4732416F18	5.96177	5.81608	5.69302	5.78628	5.69104	5.78579	5.82255	5.86113	5.6658
4732418C07RIK	8.07693	8.15012	8.18421	7.74469	7.76715	7.72785	7.88345	8.11971	7.91147
4732429D16RIK	5.85077	5.72231	5.70323	5.86395	6.10283	6.13812	6.02093	6.22908	6.06831
4732429I09RIK	5.8779	5.6948	5.70426	5.57724	5.61926	5.65644	5.79003	5.66576	5.64602
4732433M03	5.70456	5.62457	5.74607	5.66747	5.57297	5.6418	5.80758	5.78636	5.89162
4732435N03RIK	6.75293	6.90093	6.6042	6.15112	6.19216	6.09222	6.29613	6.52253	6.77373
4732437J24RIK	6.76062	6.77084	6.64899	7.00437	6.85595	6.81532	6.64704	6.59682	6.49459
4732454E20RIK	5.7915	5.87404	5.95742	5.75131	5.73338	5.77831	5.53977	5.78103	5.48786
4732456N10RIK	5.64848	5.65327	5.46144	5.85301	5.72217	5.81353	5.92736	5.74422	5.7547
4732465J09RIK	6.46509	6.98846	6.66083	6.4739	6.40012	6.30565	6.63343	6.58931	6.68752
4732467B22	5.7002	5.92228	5.68268	5.90409	5.91635	5.99619	5.8084	6.01494	6.09605
4732467L16RIK	5.6053	5.67536	5.6192	5.61767	5.72808	5.68123	5.56648	5.66437	5.49121
4732471D19RIK	7.28505	7.37098	7.39295	7.15655	7.0473	6.98927	6.94318	6.88137	7.16575
4732472I07RIK	5.91224	5.96889	6.01316	5.77471	5.81016	5.89192	5.95407	6.11593	5.94868
4732473B16RIK	5.86042	5.64064	5.55195	5.92223	5.74971	5.80744	5.78696	5.62697	5.90054
4732474A20RIK	5.75691	5.82481	5.78785	5.67935	5.74629	5.82033	5.91101	5.84411	5.74434
4732475C15RIK	6.37426	6.33177	6.32244	8.03753	8.30941	7.92089	7.21825	7.5097	7.53488
4732479N06RIK	7.10167	6.82768	7.26416	6.83482	6.88598	6.91815	7.18058	6.87434	7.125
4732481H14RIK	6.55746	6.37803	6.07674	6.32294	6.47299	6.4182	6.27963	6.35948	6.6175
4732484G22RIK	5.93013	5.54109	5.65807	5.7122	5.75464	5.59631	5.64096	5.61773	5.76413
4732486J07RIK	5.47023	5.47976	5.61965	5.81756	6.1063	5.64764	5.44622	5.4773	5.78911
4732493F09RIK	10.3975	9.84115	9.96768	10.3105	10.3105	9.94941	9.90467	10.2515	10.3224
4732495E13RIK	11.0346	10.804	10.9753	10.3901	10.1794	10.0558	9.73288	10.8177	10.4126
4732495G21RIK	5.7609	5.68982	5.70796	5.55683	5.43	5.5852	5.82181	5.7154	6.02244
4732496G21RIK	7.12886	7.6634	7.46612	7.88593	7.54539	7.63106	7.52504	7.88593	7.56841
4732496O08RIK	8.13222	7.92765	8.38404	7.65707	7.56841	7.52953	8.16236	8.07937	8.03571
4732496O19RIK	6.46978	6.17848	5.99328	6.30736	6.25699	6.25699	6.11054	6.17269	5.85838
4732497O03RIK	7.63739	7.64617	7.79739	7.43311	7.66988	7.62773	7.8247	7.74962	7.6865
4733401H18RIK	6.14293	6.5844	6.02418	7.26098	7.3341	7.3125	6.67408	6.85759	6.4194
4733401H21RIK	5.47245	5.51554	5.80893	5.44054	5.54851	5.57542	5.54382	5.59875	5.90165
4831417L10	5.67992	5.55369	5.92203	5.73316	5.76979	5.8948	5.85188	5.9732	5.56173
4831426I19RIK	6.0737	5.8224	5.87545	5.85662	5.98751	5.91821	6.12197	6.06268	6.24111
4831428F09RIK	5.512	5.7933	5.72806	5.79866	5.73482	5.64662	5.40061	5.59541	5.75999
4832406C22	6.30058	5.82306	5.93571	5.71874	5.79735	5.81562	5.95194	5.98728	6.00576
4832428D23RIK	5.87954	5.74396	5.6204	5.93421	6.1045	5.94066	5.97291	6.10794	6.13812
4833401D15RIK	5.73786	5.64647	5.85482	5.9462	5.79258	5.7292	5.88298	5.63762	6.09165
4833405L16RIK	5.7817	5.80689	5.82903	7.77261	7.98814	7.93915	6.17906	5.80065	5.85794
4833412E22RIK	5.76009	5.89237	6.03055	5.63522	5.652	5.66639	5.63488	5.83562	5.58156
4833417A11RIK	5.92396	5.744	5.77331	5.78122	5.68584	5.73251	5.65158	5.63701	5.65309
4833418A01RIK	8.59992	8.82484	9.12944	8.01899	7.91147	7.72576	7.77871	8.10102	8.3919
4833420G17RIK	9.90467	10.4962	9.53697	10.6699	10.4574	10.4472	9.606	10.4739	9.90467
4833420K19RIK	9.09696	9.85052	9.4736	10.5069	10.4191	10.5947	10.1493	9.87706	9.86278
4833420N02RIK	6.15075	6.42357	6.09686	6.1253	6.28619	6.11921	6.64006	6.57242	6.36561
4833421E05RIK	7.74102	7.5362	8.01085	7.11547	7.11508	7.03187	7.49562	7.5852	7.28899
4833422F06RIK	7.64138	8.08979	8.18501	7.56718	7.56428	7.54644	7.63444	7.7456	7.79161
4833422F24RIK	5.86716	5.66427	6.10171	5.94757	6.00303	6.06514	5.83338	5.70085	5.78647
4833423E24RIK	5.62473	5.82846	5.6904	5.85843	5.72374	5.60878	5.66351	5.76672	5.71052
4833424O15RIK	5.86709	5.91875	5.91305	5.65289	5.60456	5.59839	5.88209	5.66285	5.73722
4833424P18RIK	7.6049	7.85474	7.67163	7.80989	8.12452	8.15612	7.92323	7.79459	7.84574
4833426J09RIK	8.81908	8.79247	8.4192	8.18194	8.25494	8.17805	8.70805	8.45148	8.06818
4833427G06RIK	5.82252	5.82003	5.68297	5.53566	5.61663	5.8008	5.69745	5.74516	5.6954
4833432M17RIK	5.83454	5.85983	5.90871	5.97526	6.08877	6.06143	6.65923	6.37843	6.45156
4833436C18RIK	6.3969	6.4423	6.59103	6.08114	6.09473	5.91674	5.99823	6.05004	6.4709
4833439L19RIK	8.23297	8.4079	8.16126	8.61595	8.65204	8.6297	8.58648	8.52392	8.52392
4833442J19RIK	6.29156	6.46221	6.38737	6.38267	6.44457	6.27551	6.94	6.75415	6.77869
4833446K15RIK	5.85911	5.5687	5.91908	5.8391	5.60566	5.65173	5.69059	5.71607	5.57849
4921501E09RIK	5.88525	5.57111	5.79588	6.14607	6.283	6.14607	6.34626	6.33505	6.62935
4921501M20RIK	5.71949	5.98562	5.63701	6.31198	6.10742	6.38737	5.96587	5.73453	6.0104
4921503C21RIK	5.58665	5.70371	5.65046	5.73513	5.91331	5.73195	6.08923	5.79425	5.89841
4921504E06RIK	5.81218	5.64014	5.92696	5.76683	5.82327	5.71194	5.78245	5.78722	5.67402
4921504I05RIK	5.59315	5.55805	5.46878	5.65122	5.67075	5.60217	5.57355	5.84096	5.54668
4921505C17RIK	9.38581	9.77508	9.64993	9.0831	8.91305	8.83088	8.62328	9.46761	9.17441
4921506I22RIK	9.15446	9.25141	9.5592	9.0403	9.16579	8.93406	8.99368	9.42369	9.39968
4921506M07RIK	5.86424	5.99424	5.72143	5.70834	5.85817	5.94641	6.04483	5.67724	5.76586
4921507I02RIK	6.27372	6.32011	6.06358	6.08823	6.24148	6.12266	6.09712	6.32073	5.4934
4921507P07RIK	5.72345	6.18428	5.69167	5.90404	5.91022	5.89175	5.75071	6.08842	6.31492
4921508O11RIK	5.59839	5.805	5.55805	5.98569	6.10042	6.08378	6.05378	5.97018	5.94117
4921509C19RIK	5.652	5.60854	5.82846	5.83312	5.85966	5.83676	5.89848	5.94891	5.85989
4921509E07RIK	5.96106	5.76631	6.16881	5.71477	5.56795	5.60672	5.54568	5.75554	5.58106
4921510H08RIK	5.63808	6.14119	5.56486	5.75562	6.04675	6.0527	6.17632	5.99872	5.95854
4921510J17RIK	5.59875	5.85494	5.61699	5.59944	5.52734	5.60862	5.6814	5.79253	5.69068
4921511C16	6.37155	6.17705	6.36066	6.26158	6.45683	6.41174	6.76003	6.1225	6.49606
4921511C20RIK	5.61319	5.6528	5.56422	5.75179	5.68311	5.70984	5.91875	5.68512	5.61854
4921511F01RIK	5.79659	5.89113	5.82656	5.81843	5.67954	5.78384	6.03101	5.92977	5.87543
4921511H03RIK	5.73619	5.71953	5.63354	5.70739	5.67846	5.71009	5.8706	5.92594	5.83999
4921511I16RIK	6.35333	6.11403	6.78762	6.30875	6.40986	6.3922	6.80539	7.28735	6.87974
4921513B05RIK	5.8475	5.73964	6.25035	5.78988	5.77331	5.90544	5.98493	5.81245	5.82571
4921513O04	5.77176	5.87226	5.99686	5.66486	5.71035	5.57527	5.59713	5.75056	5.95347
4921515J06RIK	5.65535	5.58018	5.61292	5.7482	5.79685	5.75265	5.83824	5.77623	5.96637
4921516M08RIK	5.59828	5.46557	5.75866	5.69183	5.46195	5.52139	5.70806	5.87254	5.67823
4921517D21RIK	5.64226	5.5428	5.66531	5.5126	5.59413	5.69658	6.04164	5.73878	5.62485
4921517D22RIK	5.43204	5.65855	5.51636	5.58634	5.78957	5.69806	5.821	5.66841	5.93878
4921520G13RIK	5.75946	5.71898	5.91357	6.01809	6.19462	6.06103	6.1534	6.30593	6.06463
4921520P21RIK	5.86166	5.91231	5.80325	5.76177	5.70662	5.72013	5.79897	5.73679	5.67051
4921521F21RIK	5.78233	5.77	5.85608	5.59743	5.66841	5.64239	5.63528	5.56156	5.5404
4921521N14RIK	5.98551	5.65617	5.69623	5.50097	5.57944	5.62827	5.84127	5.75232	5.54511
4921522K05RIK	5.74872	5.99436	5.9389	5.64994	5.63984	5.61158	5.77368	5.94392	5.82289
4921523A10RIK	5.76552	5.72341	5.73486	5.75819	5.77182	5.77923	5.75468	5.91667	5.79079
4921524J17RIK	5.48502	5.5427	5.73596	5.48566	5.67182	5.56458	5.55849	5.67225	5.3865
4921524P20RIK	8.03207	7.72018	7.95795	7.5948	7.6694	7.39848	8.20757	8.12408	8.18685
4921525D22RIK	5.82653	5.80811	5.8153	5.81995	5.91754	5.78731	5.78053	5.8971	5.94908
4921525H12	5.81318	5.89064	6.00317	5.97132	5.9208	5.94755	6.05951	5.7313	5.76392
4921528G01RIK	7.52099	7.64406	7.01214	8.34532	8.31836	8.17664	7.49754	7.84381	7.81297
4921528I01RIK	5.90699	5.86282	5.70501	5.76411	5.60194	5.6039	5.88369	5.8495	5.68753
4921529O18RIK	6.21675	6.14134	5.89768	5.67478	5.58837	5.78154	5.62807	5.99123	5.69073
4921530G04RIK	5.57187	5.33505	5.4394	5.42372	5.62738	5.48702	5.83002	5.63038	5.67125
4921530L21RIK	5.78225	5.61707	5.66046	5.6874	5.85825	5.92341	6.02069	5.8917	5.80071
4921532K09RIK	5.90095	5.95335	5.67233	6.21031	6.1463	6.31468	5.98174	6.26722	5.70323
4921533L14RIK	5.65184	5.57586	5.6483	5.63708	5.54638	5.45134	5.59286	5.92867	5.50486
4921536K21RIK	5.88592	5.92796	5.82312	5.96451	6.02325	5.8978	6.30565	5.97903	5.75438
4921537D05RIK	8.88361	9.1944	9.52626	8.43579	8.6981	8.56317	9.1071	9.22273	9.13673
4921537P18RIK	5.65583	5.69664	5.66634	5.62682	5.57474	5.56364	5.81746	5.59944	5.62294
4922502D21RIK	5.72869	5.90281	6.00413	5.76782	5.82812	5.55683	5.61014	5.91178	5.7063
4922503E23RIK	5.53303	5.95279	5.66226	5.9157	5.73561	5.61302	5.77919	5.54867	5.75119
4922503N01RIK	5.6243	5.94199	5.8391	5.74836	5.80823	5.71135	5.83999	5.78782	5.90469
4922504H04RIK	5.90459	5.75762	5.90703	5.67094	5.72806	5.76447	5.8244	5.62691	6.02458
4922504M18RIK	5.68716	5.71492	5.73513	5.90779	5.82215	5.92669	5.71716	5.94293	5.61538
4922505E12RIK	5.70025	5.69121	5.84557	5.76706	5.92892	5.74477	5.64008	5.68106	6.07594
4922505G16RIK	5.85047	5.93511	5.90887	5.96007	5.94586	6.00388	5.81452	5.85135	5.8402
4930401F20RIK	5.90779	5.84597	5.80272	5.72865	5.87515	5.73076	5.98541	5.80355	5.84411
4930402E16RIK	5.78492	5.82334	6.19111	5.8999	5.88819	5.51917	5.45995	6.26377	5.495
4930402H24RIK	6.17468	6.66426	6.30939	6.6269	6.56543	6.54866	6.01109	6.24279	6.03917
4930403C10RIK	6.30789	7.09417	7.13032	6.78762	7.03571	6.80835	6.84151	6.84976	6.84945
4930403J22RIK	6.09199	6.28999	5.83144	6.58388	6.56441	6.86041	6.42058	6.4968	6.16409
4930403L05RIK	5.84918	5.82685	5.96676	5.78766	5.79429	5.68689	5.62891	5.61359	5.73591
4930403O06RIK	9.25565	9.19019	9.57259	8.64683	9.06698	8.88106	9.29163	8.93596	8.92441
4930404H21RIK	5.87199	5.84909	5.75364	5.75558	5.66315	5.65003	6.18004	5.79796	6.06924
4930404N11RIK	5.75207	5.67142	5.62054	5.83658	5.87995	5.70906	5.79418	5.84092	6.1674
4930405J24RIK	5.641	5.68795	5.61626	5.4684	5.72393	5.44299	5.61864	5.57517	5.71389
4930408O21RIK	5.84771	5.71472	6.16376	5.80803	5.80505	5.72983	5.64817	5.79738	5.91041
4930412F15RIK	5.53052	5.61242	5.65014	5.62276	5.68146	5.62063	5.52637	5.82559	5.71095
4930415G15RIK	5.70114	5.83378	5.77911	5.7836	5.8359	5.87975	5.44088	5.59982	5.70269
4930415J21RIK	6.84789	6.87974	6.94577	6.61451	6.61875	6.48436	6.89159	6.85269	6.89324
4930415L06RIK	5.6263	5.70635	5.70489	6.28938	6.17758	6.35307	5.89684	6.06442	6.00669
4930417M19RIK	5.48293	5.61035	5.72028	5.62758	5.62411	5.53826	5.88535	5.53443	5.73847
4930418G15RIK	5.84174	5.98761	5.83462	5.77136	5.85301	5.75829	5.77633	5.65295	5.65085
4930418P06RIK	7.91269	7.44339	7.44026	6.61796	6.73046	6.79086	7.4313	7.12049	7.33466
4930422J18RIK	7.73093	7.39713	7.21558	6.86486	6.90758	7.00231	6.71285	7.65549	7.5977
4930424G05RIK	5.86231	5.76552	5.70591	6.83249	6.97573	6.77305	5.92905	6.02301	5.77518
4930425N13RIK	6.10051	6.00005	6.01674	5.69424	5.74765	5.70618	5.66292	5.63717	5.81339
4930427A07RIK	6.33358	6.46713	6.65397	6.37006	6.67306	6.65791	6.15379	6.34582	6.50704
4930428D18RIK	5.83103	6.08708	5.91292	5.81669	5.73824	5.76492	5.78282	5.60748	5.75342
4930428E23RIK	5.51636	5.65363	5.71171	5.61926	5.65014	5.572	5.54436	5.83556	5.93241
4930429A08RIK	6.98881	7.26737	7.36811	7.17584	7.15922	7.21391	7.06037	7.2886	7.33848
4930429A22RIK	8.00176	7.81968	7.88953	7.31497	7.38157	7.29941	7.88849	7.62834	7.55979
4930429M06RIK	5.84067	5.99663	5.69777	5.75276	5.79284	5.76806	6.18961	5.73428	5.73994
4930430A15RIK	5.54197	5.85531	5.6708	5.61485	5.58421	5.76532	5.81781	5.73482	5.47651
4930430D24RIK	5.87226	6.02069	5.7808	5.68989	5.67119	5.68263	5.6017	5.59384	5.78405
4930430E16RIK	5.8557	5.67176	5.77363	5.95051	5.90685	5.82929	5.83454	5.96094	5.9075
4930431B11RIK	6.84355	6.97888	7.15075	6.26513	6.33396	6.17889	6.24071	6.74674	6.78188
4930432B04RIK	9.11468	9.53058	9.53624	8.53553	8.95853	8.87165	9.68252	9.41937	9.47477
4930432H15RIK	5.77233	5.85511	6.21348	5.6799	5.69392	5.70759	5.47764	5.7108	5.72649
4930432J16RIK	5.84055	6.01144	5.66569	5.55486	5.71155	5.80057	5.55297	6.00098	5.82529
4930432K09RIK	5.55272	5.77546	5.77082	5.57076	5.55625	5.60234	5.9878	5.82009	5.78771
4930432K21RIK	6.20064	6.17739	6.23575	5.95516	6.06908	6.04157	6.01266	5.63284	5.8478
4930432M17RIK	6.1253	5.7827	5.79227	5.66863	5.79276	5.85425	5.94306	5.92473	5.85271
4930432O21RIK	9.16882	9.49355	9.35868	8.52662	8.25372	8.27908	8.59213	8.47859	8.57681
4930433I11RIK	5.72626	5.67156	5.68028	5.81919	5.70111	5.61802	5.78699	5.64404	5.71483
4930434E21RIK	5.69655	5.69002	5.64096	5.76755	5.87279	5.68212	5.7756	5.51083	5.7366
4930438M06RIK	5.94506	6.00119	5.76413	5.98247	5.8249	6.01641	6.25651	5.82511	5.75807
4930438O03RIK	6.33776	6.10479	6.29586	5.89541	5.90538	5.92366	5.60776	5.69884	5.99622
4930438O05RIK	6.51971	6.23331	5.97791	6.17014	6.12345	6.12	5.88205	6.26654	6.15786
4930442L21RIK	5.48425	5.51024	5.44254	5.52312	5.34506	5.43	5.61394	5.85037	5.75108
4930444A02RIK	5.8761	5.80799	5.53529	6.19541	6.13193	6.2611	5.80285	6.20566	5.90199
4930447C04RIK	5.59488	5.90158	5.89865	5.68637	5.77775	5.69262	5.77345	6.05378	6.18028
4930449E07RIK	6.73347	6.73225	6.83053	6.31605	6.19873	6.25854	6.25534	6.50953	6.61796
4930449I24RIK	5.77202	5.51617	5.73433	5.6903	5.69906	5.64611	5.91357	5.66665	6.23831
4930451C15RIK	5.5194	5.87718	5.68588	6.03241	5.93807	6.01092	5.91513	5.8053	5.99947
4930451F05RIK	5.7568	5.70992	5.61023	5.42638	5.56574	5.42435	5.81201	5.76063	5.72928
4930451I11RIK	5.77553	5.98222	6.02325	5.91238	5.90617	5.97518	5.83658	5.96799	5.9694
4930452B06RIK	6.44907	6.36441	6.45766	5.78387	5.76131	5.79859	6.09854	6.47838	6.41006
4930453N24RIK	9.61678	9.57259	10.2245	9.6004	9.65867	9.68174	9.89563	9.92196	9.78656
4930455C21RIK	7.30029	7.18058	7.57951	7.35783	7.41513	7.59563	7.83521	7.95105	8.60383
4930455F23RIK	8.37685	8.55337	8.7678	7.84888	7.905	7.86446	8.43972	8.28992	8.44577
4930465K10RIK	6.09721	6.31109	5.87674	5.94406	5.87053	5.9155	6.17989	5.95463	6.03666
4930466G16RIK	5.665	5.81661	5.56284	5.75162	5.65456	5.76868	5.66126	5.79644	5.75995
4930467B06RIK	6.19041	6.12019	6.27337	6.31323	6.21413	6.24273	6.55845	6.33555	6.32244
4930467M19RIK	5.86382	5.75318	5.65351	6.04777	6.0542	6.18709	6.28584	5.86617	6.32294
4930470D19RIK	6.75918	7.43589	6.18645	8.01151	7.82431	7.87907	7.14298	7.57866	7.13794
4930470P17RIK	5.90763	6.11957	6.16824	5.77467	5.90048	5.82989	5.845	5.89316	5.61307
4930471M23RIK	5.98168	5.76324	5.73123	5.92306	6.12899	5.96781	5.94942	5.99042	5.85511
4930471O16RIK	7.75348	7.94041	7.67324	6.69945	6.96418	6.89956	8.33497	8.15189	7.96793
4930474N05	5.82989	5.89322	5.67191	5.86599	5.99212	5.96288	6.23865	6.15266	5.94359
4930478A21RIK	6.1755	6.22523	5.73218	6.10327	6.01747	6.01518	5.76025	5.88361	5.83856
4930481F22RIK	6.19505	6.17495	6.23134	6.00323	5.95391	5.9122	5.8478	5.79991	5.73473
4930481M05	5.79065	5.61233	5.73322	5.92514	5.734	5.84716	5.91605	5.74685	5.88176
4930485D02RIK	7.74399	7.71516	7.12766	8.31143	8.27681	8.35766	8.13689	7.63764	7.93485
4930486G11RIK	5.75814	5.77883	6.05297	6.04241	5.85559	5.84602	5.75653	5.93987	5.72806
4930486L24RIK	7.43374	7.61128	7.70565	7.73875	7.83759	7.92323	8.20028	7.69609	7.41358
4930488L10RIK	5.75896	5.64516	5.66682	5.90881	5.93775	5.9565	5.76796	5.73369	5.63166
4930488P06RIK	9.3869	9.59776	9.00907	9.0388	9.00907	8.89894	9.15605	9.18514	9.1118
4930500E24RIK	6.17495	5.91996	6.06264	5.80392	5.70209	5.87377	5.79012	5.80604	5.69082
4930502E18RIK	5.607	5.58156	5.69988	5.6609	5.69557	5.53846	5.87002	5.74846	6.06261
4930503B16RIK	5.5577	5.51485	5.7592	5.72904	5.57038	5.55112	5.85274	5.62149	5.66525
4930503B20RIK	6.03512	5.75597	5.80797	5.84533	5.96359	5.8413	6.21097	5.95385	6.31451
4930503E14RIK	5.77429	5.71526	5.80385	5.77683	5.66818	5.73206	5.85174	5.69061	5.79893
4930503L19RIK	6.12687	6.81919	6.12313	6.62796	6.77796	6.60873	6.24007	6.65761	7.19704
4930504E06RIK	8.24672	8.16071	8.23399	8.0816	7.75862	7.8007	7.78109	7.95372	8.12179
4930504O13RIK	5.48868	5.56085	5.44194	5.53138	5.43625	5.42804	5.92696	5.77397	5.80025
4930506C02RIK	6.80169	6.48674	6.85185	6.25534	6.24868	6.23415	6.15494	6.56605	6.0587
4930506D23RIK	6.65761	7.102	6.92759	6.42357	6.45636	6.38432	6.91956	6.45376	6.68532
4930506L13RIK	5.57378	5.94704	5.52296	5.80777	5.69285	5.84117	6.10685	5.81386	5.78229
4930506M07RIK	6.00201	5.47694	5.93545	6.27315	6.17477	6.06895	5.60566	5.79272	5.44133
4930507C10RIK	6.51013	6.47213	6.74123	6.21565	6.13121	6.21431	6.03001	6.3584	6.32566
4930509O22	6.07716	5.94775	5.85336	6.07038	6.10219	6.05427	6.30608	6.2611	6.14194
4930511H11RIK	6.00144	5.70806	5.83856	5.66497	5.61946	5.60755	5.72264	5.7933	5.81256
4930511I11RIK	5.69389	5.82781	5.67878	5.80784	5.81338	5.79995	5.74607	5.73244	5.94605
4930511J11RIK	5.84957	6.06831	5.74052	6.18417	6.18169	6.11412	6.35657	5.95319	5.88168
4930511M11RIK	5.749	5.71753	5.50436	5.70287	5.64595	5.59975	5.92089	5.58747	6.03164
4930511O11RIK	6.0043	5.64641	6.00688	5.73433	5.65453	5.67394	5.90165	5.66739	5.55533
4930515G01RIK	5.95742	6.40714	6.20927	6.88137	6.70704	6.87344	6.92119	6.08577	6.46912
4930517G15RIK	5.7026	6.03413	5.82334	5.8153	5.56816	5.7656	5.53232	5.56834	5.72004
4930517K11RIK	5.77607	5.76385	5.81762	5.73704	5.77169	5.7857	5.46339	5.93377	5.71314
4930517K23RIK	5.86484	5.7549	5.73177	5.99085	5.91341	5.92921	5.97979	5.77017	5.99783
4930518C23RIK	5.66486	5.89723	5.8099	6.21097	5.89706	6.02282	6.33255	6.03241	5.96781
4930518F03RIK	5.42919	5.64177	5.54975	5.56231	5.75131	5.83588	5.78753	5.72986	5.72722
4930519F16RIK	5.64148	5.57527	5.63957	5.88715	5.69979	5.75714	5.80928	5.75401	5.78664
4930519G04RIK	5.5787	6.05753	6.04483	5.70339	5.76136	5.78366	5.949	5.84528	5.82964
4930519N13RIK	5.72298	5.6755	5.41896	5.92989	5.88422	5.84841	5.63663	5.50462	5.81709
4930519N16RIK	5.42587	5.68173	5.6278	5.50821	5.75584	5.6977	5.76401	6.17771	5.82526
4930521A18RIK	5.89468	5.9863	5.77063	5.67057	5.84497	5.82699	5.7853	5.74747	5.80843
4930521E07RIK	6.26363	6.15494	6.22369	6.38249	6.43606	6.40314	6.38596	6.08714	6.30805
4930522D07RIK	5.5889	5.72175	5.59512	5.68212	5.52233	5.68832	6.02156	5.87644	5.63217
4930522H14RIK	5.79623	5.63128	5.94313	5.88829	5.73912	5.81043	5.69024	5.65417	5.70064
4930524B15RIK	5.71854	5.66081	5.83948	5.67665	5.66703	5.67104	5.94792	5.65173	5.86049
4930524E20RIK	6.20819	6.34323	6.80404	5.88284	5.86228	5.83233	5.97863	6.00352	5.94565
4930525K10RIK	5.61292	5.52909	5.66863	5.75173	5.6473	5.70569	5.84226	5.79586	5.87512
4930526D03RIK	5.8077	5.85185	5.78928	5.64891	5.73492	5.70132	5.80572	5.64986	5.55689
4930527D15RIK	9.42945	9.04324	9.27083	8.69865	8.64683	8.78118	8.67482	8.77575	8.95067
4930529M08RIK	5.52909	5.95545	5.86782	5.86179	5.8272	5.80175	5.68998	5.80572	5.8881
4930532D21RIK	5.9704	5.86992	6.26899	5.85583	5.68919	5.77297	6.03759	5.94868	5.99383
4930535B03RIK	6.52693	6.31712	6.26015	6.33309	6.22393	6.32724	5.9676	6.3858	6.25153
4930535E21RIK	5.92977	5.91255	5.71755	6.13234	6.03617	6.01273	6.25608	5.71396	5.72748
4930538D17RIK	6.15027	6.43066	5.87491	5.90364	5.75719	5.73263	5.80867	6.16619	6.14318
4930538K18RIK	5.6149	5.62363	5.83435	5.65026	5.68672	5.67995	5.50142	5.60739	5.62206
4930539E08RIK	6.89678	6.72763	6.96025	5.79687	5.67333	6.23196	5.66427	6.71171	6.47745
4930540L03RIK	5.97428	6.11432	6.41257	6.08425	6.10194	5.99064	5.64138	5.77806	5.77219
4930542G03RIK	10.2066	10.1609	10.3337	11.2695	11.4308	11.2458	11.4459	10.8675	11.2409
4930542N07RIK	5.62751	5.74602	5.63646	5.54027	5.55842	5.55374	5.71741	5.6053	5.69477
4930544G11RIK	6.74631	6.81217	7.36524	5.96496	5.8705	5.91248	5.77219	6.35598	6.01518
4930544G21RIK	6.0527	6.39125	6.04241	5.91472	5.95263	5.93241	6.0277	5.95106	6.01189
4930547C10RIK	5.88601	5.83217	5.83421	6.20819	6.3584	6.26654	5.69392	5.96781	5.88103
4930547N16RIK	7.04458	7.64839	7.66064	6.76745	7.33743	7.11074	7.51054	7.33822	7.5694
4930548G07RIK	5.85486	5.92341	5.58454	5.74251	5.75344	5.72916	5.76238	5.78621	5.81726
4930548H24RIK	5.56244	5.77531	6.20114	5.97652	6.00552	5.99334	5.64986	5.75096	5.73927
4930549C01RIK	5.65289	5.78719	5.75989	5.85573	5.88199	5.7487	5.56556	5.82739	5.54089
4930549O06	5.64218	5.96515	5.63596	5.68457	5.47306	5.65264	5.65913	5.68568	5.59066
4930550B20RIK	6.43571	6.51725	6.44867	6.36783	6.282	6.23681	6.27418	6.27147	6.48104
4930550C14RIK	6.63272	6.16306	6.77628	6.38198	6.35246	6.65645	6.94234	5.80228	6.15829
4930550L21RIK	6.02571	5.9024	5.9768	5.92374	5.89932	5.77122	5.93766	5.81548	5.84703
4930550L24RIK	5.62272	5.70662	5.65295	5.73102	5.83222	5.86198	5.61421	5.84735	5.80298
4930555G01RIK	5.61557	5.68372	5.69239	5.79183	5.76855	5.80494	5.94199	6.10276	5.79409
4930555I21RIK	5.71045	5.68786	5.74333	5.65576	5.57068	5.68704	6.35003	5.8755	5.94775
4930556P03RIK	7.29941	7.10827	6.75772	7.10167	7.07086	7.07564	7.35169	7.10433	7.39295
4930558O21RIK	5.91333	6.15472	6.40771	5.77698	5.77202	5.69339	5.70153	5.6453	5.63584
4930562C03RIK	8.07353	8.05744	8.48428	8.34754	8.26063	8.21938	7.65339	8.26032	7.89987
4930562D19RIK	5.82155	5.82779	5.95623	5.76086	5.89568	5.78558	5.8097	5.93694	5.81118
4930563A03RIK	5.88851	6.10679	5.91821	5.79394	5.80467	5.6493	5.63584	5.69689	5.72874
4930563D23RIK	5.92027	5.87674	5.8513	5.79089	5.75905	5.71753	5.71567	5.7077	5.55787
4930563E19RIK	5.58326	5.79749	6.07056	5.54231	5.78868	5.68367	5.6497	5.90383	5.94352
4930563M21RIK	5.5851	5.54959	5.58679	5.82395	5.73276	5.31036	5.67203	5.75829	5.75173
4930563P21RIK	5.6948	5.97963	5.73951	5.72077	5.70203	5.69703	5.54703	5.92099	5.85077
4930564N15RIK	5.79237	5.51499	5.36618	5.52139	5.51277	5.58625	5.45164	5.75737	5.83516
4930569K13RIK	5.64474	5.6993	5.67905	5.99985	6.03109	5.86065	6.37986	6.00754	6.23847
4930570C03RIK	7.76428	7.40354	7.18224	7.43834	7.41686	7.46819	6.99326	7.71127	7.48997
4930572I07RIK	5.92383	5.80128	5.89146	5.87515	5.84357	5.9075	5.78796	5.76243	5.78868
4930572J05RIK	9.69665	10.0033	9.47965	10.1437	10.4268	10.3414	9.83598	9.45552	9.67152
4930572L20RIK	5.86872	5.86925	5.81785	5.8711	5.82727	5.71619	5.77852	6.20239	6.01085
4930573I19RIK	6.61093	6.74123	6.56963	6.79734	6.71756	6.56274	6.09733	6.57638	6.75006
4930578C19RIK	5.80541	5.83165	5.49905	6.12647	6.13921	6.05847	5.67917	5.41036	5.96593
4930578F03RIK	7.22187	7.58624	7.58045	7.0112	7.29358	7.21616	7.04667	7.4139	7.06766
4930578I06RIK	6.03282	5.73821	5.70753	6.05687	6.00019	5.93935	6.23908	6.14077	5.82966
4930579C12RIK	5.72196	5.88993	5.71944	5.88111	5.91708	5.84528	5.95694	5.64741	6.06715
4930579C15RIK	5.38371	5.46231	5.35047	5.63854	5.40985	5.44889	5.39678	5.67871	5.96812
4930579E17RIK	5.77649	5.71263	5.85687	5.80431	5.73163	5.83705	5.77849	5.69302	5.73697
4930579G22RIK	5.66437	5.69897	5.73519	5.55714	5.53084	5.50551	5.38371	5.59483	5.6689
4930579J09RIK	5.7651	5.61126	5.66447	5.94418	5.93282	5.93987	5.89723	6.22199	6.38647
4930580F03RIK	5.7456	5.68182	5.97286	5.71601	5.79494	5.77492	5.67922	5.59949	5.69627
4930583C14RIK	5.96964	5.9878	5.70525	5.64057	5.61074	5.71399	5.57385	5.69812	5.74297
4930583H14RIK	5.68758	6.04072	6.40951	6.0174	5.9896	6.07572	5.88581	5.92509	6.06639
4930588M11RIK	5.30535	5.40331	5.36366	5.38437	5.32812	5.44342	5.62087	5.78443	5.74542
4930590J08RIK	5.64002	5.94687	6.32	5.68872	5.63905	5.74155	5.70339	5.68433	5.94259
4930594M22RIK	5.85482	5.73927	5.7841	5.78809	5.93036	5.77083	5.8189	5.66549	5.60396
4930595M18RIK	5.84083	5.94126	5.86138	5.63824	5.61485	5.87132	5.88307	5.73966	5.62444
4930596D02RIK	5.62164	5.8905	5.71314	5.69956	5.63175	5.53754	5.56853	6.19448	5.7209
4930599N23RIK	5.76379	5.85895	5.78097	5.71589	5.70834	5.68161	5.9462	5.93831	6.02726
4931400A14RIK	7.97195	7.94752	8.48734	7.70565	7.7927	7.76848	8.26527	7.8902	7.98595
4931403F16RIK	5.64196	5.71993	5.62168	5.58824	5.5552	5.56556	5.67992	5.70217	5.83075
4931406B18RIK	5.57749	5.94533	5.73812	5.62906	5.66744	5.59882	5.72729	5.61151	5.84953
4931406C07RIK	6.59149	6.77144	6.38249	6.40115	6.45376	6.38836	6.74707	6.80891	6.85121
4931406H21RIK	5.93377	6.06079	6.30156	5.81681	5.80185	5.89008	5.78321	5.99396	5.88592
4931406I20RIK	6.09921	5.96847	5.92473	6.47811	6.46042	6.48371	6.3574	6.41257	6.48861
4931406P16RIK	9.01265	9.142	9.47477	8.28364	8.34356	8.29591	8.37407	8.78719	8.50209
4931407G18RIK	5.55352	5.4029	5.55374	5.34291	5.43249	5.46967	5.55552	5.74446	5.70952
4931407K02RIK	5.78306	5.93737	5.87503	5.83095	5.81321	5.77323	5.82553	5.92247	5.71345
4931408A02RIK	5.78793	5.80265	5.69515	5.67075	5.72041	5.72437	5.94498	5.66423	5.926
4931408C20RIK	5.8208	5.81948	5.76474	5.57172	5.67658	5.6832	5.81264	5.65554	5.69956
4931408L03RIK	6.67178	6.48229	7.20676	7.92364	7.59609	7.57286	7.37189	7.5694	7.18761
4931409K22RIK	5.8936	5.91417	5.75774	5.66942	5.73174	5.78685	5.69424	5.78758	5.75632
4931414L13RIK	5.97526	5.90791	5.83404	6.18074	6.17224	6.0781	6.59045	5.96881	6.29679
4931414P19RIK	5.51713	5.94339	5.53908	5.82159	5.53933	5.55818	5.56477	5.79951	5.8266
4931415M17	5.55887	5.66202	5.7125	5.57759	5.7952	5.83245	5.49353	5.60378	5.62589
4931417E11RIK	6.0584	6.15379	5.89879	5.76009	5.69721	5.62083	5.77629	5.73389	5.93275
4931417G12RIK	5.77736	5.8048	5.68249	5.55701	5.77249	5.76408	5.74186	5.5914	5.80604
4931419P11RIK	6.25803	6.25294	6.02035	5.88736	5.9157	6.03816	6.2037	6.06201	6.01191
4931427F14RIK	5.73955	5.67123	5.74832	5.72601	5.68973	5.66605	5.75453	5.78911	6.30396
4931428D14RIK	5.76019	5.87431	5.74377	5.66052	5.80124	5.624	5.74692	6.02962	5.63522
4931428L18RIK	5.99074	6.09334	5.85256	5.94119	5.97334	6.02049	6.0846	5.82685	5.85673
4931431L11RIK	8.76246	8.59339	8.92441	8.38272	8.1958	8.48387	8.29757	8.29989	8.52336
4931432M23RIK	6.3947	5.86098	6.16777	5.98606	5.77758	5.79089	5.77973	5.54833	5.78981
4931433A01RIK	5.70038	5.65343	5.56517	5.60456	5.607	5.54796	5.8866	5.75459	5.62891
4931433A13RIK	5.66929	5.78887	5.79127	5.72324	5.70711	5.59523	5.81112	5.79094	5.74396
4931440B09RIK	5.83046	5.79668	5.89401	5.66141	5.6334	5.7219	5.71511	5.43506	5.7334
4931440F15RIK	5.85616	5.78855	5.88359	5.964	5.81484	5.9781	5.95932	5.72169	5.83338
4931440L10RIK	5.87099	5.85892	5.97107	6.08025	6.11933	5.9859	5.80884	6.03719	6.02801
4931440N07RIK	6.68267	6.35991	6.85496	6.14541	6.19541	6.13049	6.59765	6.84945	6.56766
4932408F19RIK	6.62462	6.47076	6.15081	6.81984	6.76652	6.77026	7.00751	6.98091	7.14363
4932409F11RIK	9.03664	9.09838	8.9958	9.77699	9.76495	9.84	9.00284	9.371	9.42674
4932409I22RIK	5.69969	5.70705	5.87718	5.81087	5.78249	5.78252	5.6334	5.60805	5.85951
4932411E22RIK	5.85296	5.95482	6.13821	5.83618	5.80898	5.85753	6.20594	5.84304	5.62128
4932411G14RIK	5.66754	5.89045	5.78748	5.55352	5.65492	5.79929	5.93622	5.55533	5.76492
4932411N23RIK	5.53006	5.64324	5.60154	5.48719	5.40842	5.38437	5.82806	5.79203	6.059
4932412H11RIK	6.00719	6.07466	6.16908	6.03948	6.12105	6.10472	5.98562	6.15786	5.96929
4932413O14RIK	5.65745	5.546	5.61302	5.87954	5.83498	5.89138	5.45422	5.36901	5.77197
4932414J04	5.87369	5.92131	6.12751	5.83271	5.73373	5.7301	5.65437	5.88213	5.86338
4932414K18RIK	13.1384	12.8746	12.7387	12.8156	12.6584	12.4467	12.2547	12.7097	12.7027
4932414N04RIK	5.58778	5.86269	5.72808	5.58981	5.74688	5.66531	5.90544	5.7904	5.66098
4932415G16RIK	5.77998	5.58319	5.74422	5.60032	5.43909	5.65492	5.74066	5.50821	5.37304
4932415M13	5.62906	5.67417	5.70181	5.62198	5.62087	5.54766	5.69277	5.6507	5.66986
4932416A11RIK	5.89459	5.86408	5.72022	5.72725	5.81172	5.7402	5.83189	5.6277	5.64855
4932416A15	5.8378	5.83257	5.76411	5.88265	6.03741	5.8715	5.87515	5.73105	6.11425
4932416N17RIK	6.23847	6.05287	6.0208	6.09593	6.03546	6.08708	5.95324	5.72995	5.84307
4932417H02RIK	5.63797	5.55419	5.53634	5.81792	5.54947	5.45779	5.46744	5.76755	5.51469
4932418E24RIK	5.84557	5.86118	5.69733	5.79218	5.80884	5.71171	5.72093	5.71231	6.04229
4932418K24RIK	5.46418	5.47826	5.38612	5.51668	5.77891	5.70684	6.1222	5.87586	5.94547
4932430I15RIK	5.81229	6.1411	6.05072	5.74326	5.6652	5.90892	5.92792	5.65505	5.80638
4932431H17RIK	5.79473	5.75445	5.78506	5.92463	5.85142	5.97275	5.91074	5.97761	5.82481
4932432K03RIK	5.51277	5.52233	5.60948	5.44753	5.65195	5.55887	5.66341	5.67638	5.48251
4932432N11RIK	5.7562	5.83397	5.51713	6.11849	6.13438	6.14863	5.98336	6.46186	6.27609
4932438H23RIK	5.93457	5.86424	6.04012	5.86345	5.84552	5.88616	5.86235	5.91442	5.80494
4932439K10RIK	10.766	10.6699	10.6715	9.79314	9.65468	9.57392	10.1142	9.99983	10.193
4932441K18	6.14699	6.23368	6.3822	5.81868	5.8337	5.9207	5.85181	5.76161	5.83325
4932441K18RIK	9.41937	9.68439	9.09603	9.63601	9.48335	9.40989	8.57531	9.03545	9.10385
4932442K08RIK	6.86943	6.91043	6.67448	6.94318	7.04458	6.97408	6.9204	7.07024	6.90997
4932442K20RIK	8.58322	8.94017	8.18656	8.70471	8.73968	8.50471	8.28128	8.40438	8.38641
4932701A20RIK	5.71813	5.78397	5.6017	5.61748	5.60225	5.6051	5.59454	5.85047	5.79738
4932702K14RIK	5.70044	5.97925	5.74778	6.13856	6.18553	6.33177	5.94456	5.78699	6.06129
4933400A11RIK	5.84643	5.57493	6.10658	5.40942	5.65391	5.63513	5.58311	5.63248	5.5182
4933400C05RIK	5.65638	5.48868	5.74258	5.39747	5.51001	5.24305	5.49513	5.73833	5.52646
4933400E14RIK	5.74823	6.19462	5.96723	6.22523	6.11849	6.07601	5.79178	5.60711	5.58967
4933400F01RIK	6.19641	5.89392	5.74624	5.95501	5.9534	6.07839	6.16713	5.9842	6.59321
4933400K24RIK	5.90088	6.01656	6.12956	5.80112	5.8153	5.88753	5.8099	5.90843	5.86231
4933401I19RIK	5.7181	5.67646	5.65523	5.71472	5.83784	5.71023	5.85391	5.82589	5.63661
4933401K09RIK	5.67152	5.49996	5.657	5.85544	5.70602	5.6214	5.79043	5.81592	6.07114
4933401N24RIK	5.26178	5.49682	5.26178	5.95101	6.05764	5.82003	5.65745	5.84026	5.91452
4933402B14RIK	5.9829	5.99659	5.67999	6.11054	6.19847	6.15829	6.03574	5.99864	5.8792
4933402J07RIK	5.88877	5.70269	6.14863	5.90969	5.98907	5.8929	5.75924	5.54806	5.86696
4933402J24RIK	5.81099	5.78234	5.63318	5.83435	5.66811	5.73442	5.65828	5.63084	5.69466
4933402N03RIK	5.66385	5.55479	5.54496	5.38736	5.26178	5.49298	5.61298	5.58025	5.9955
4933402P03RIK	5.78449	5.5276	5.67203	5.7672	5.74343	5.7448	5.83298	5.79242	5.6758
4933403F05RIK	5.8322	5.8851	5.9989	5.8478	5.82699	5.67025	5.68786	5.55486	5.83303
4933403G14RIK	6.85942	7.20335	6.80372	5.97771	6.03805	5.92463	6.25035	6.45722	6.12121
4933403H06RIK	6.03235	6.30471	6.09854	5.95398	6.09821	6.11138	5.71755	6.05258	5.91963
4933403L16RIK	6.06949	5.933	6.21367	5.8079	5.88465	5.99153	5.82939	5.98804	5.81503
4933404M02RIK	6.21431	5.8985	5.87954	5.72273	5.68989	5.74066	5.67239	5.81093	5.73593
4933404O11RIK	5.87221	6.00719	6.01945	5.77293	5.65945	5.70727	5.68392	5.93731	5.84616
4933405A16RIK	5.59336	5.6921	5.62307	5.7301	5.44622	5.66164	5.81911	5.59882	5.87752
4933405K07RIK	5.67425	5.64041	5.6809	5.64334	5.64274	5.74086	5.67811	5.81283	6.0475
4933405K18RIK	5.56433	5.52117	5.57153	5.51289	5.40244	5.51713	5.66505	5.65505	5.46889
4933405O20RIK	5.87339	5.58875	5.79477	5.77297	5.8425	5.84515	6.20092	5.96947	5.99486
4933406A14RIK	6.33805	6.01774	6.16666	5.95749	5.97598	5.93408	6.01922	6.1859	5.88026
4933406J04RIK	6.0208	5.78259	5.65592	5.7407	5.73006	5.73426	5.53212	5.60362	5.60432
4933406M09RIK	5.66576	5.83046	5.55552	5.65118	5.84602	5.74425	5.84357	5.70009	5.62879
4933406N12RIK	6.1398	5.79859	6.67839	5.88687	5.85169	5.83378	5.92306	5.96251	5.82781
4933407I18RIK	5.75136	5.7893	6.04283	5.72532	5.83057	5.74468	5.77822	5.77318	5.81452
4933407N01RIK	8.72413	8.53553	8.36659	8.20109	8.13222	8.20879	8.46608	8.04135	8.29815
4933407P14RIK	6.328	6.11326	6.37646	6.61135	6.60135	6.69873	6.38715	6.20847	6.43987
4933408B17	5.64921	5.64662	5.6587	5.53449	5.48898	5.54218	5.51803	5.7009	5.57462
4933408F15	6.0318	6.08877	6.34718	5.97252	5.96282	6.02852	6.0292	6.00019	5.94285
4933408N02RIK	5.60682	5.81298	5.70473	6.03796	6.04249	5.96576	5.76634	5.93628	5.89237
4933409G03RIK	5.9842	6.01286	5.78425	5.66549	5.60123	5.65888	5.59958	5.8944	5.64177
4933409I22	5.59795	5.69163	6.02413	5.5561	5.51421	5.41229	5.47881	5.72772	5.87171
4933409N07RIK	6.34168	6.05258	5.71534	5.86113	5.75152	5.83338	5.56079	5.31336	5.59577
4933411C14RIK	5.89591	5.54451	5.66826	5.82544	5.63183	5.6263	6.0677	5.55385	5.9042
4933411G06RIK	5.87264	5.76991	5.8336	5.81298	5.77048	5.64185	5.73492	5.69707	5.73086
4933411G11	5.42165	5.91448	5.97694	5.42804	5.63646	5.6871	5.77877	5.81995	5.7211
4933411K20RIK	9.31563	9.3596	9.0069	9.1756	9.09409	9.19948	9.2638	9.07183	9.31563
4933412E14RIK	5.74692	5.61107	5.76676	6.05363	5.94345	5.97093	5.93408	5.86162	5.91527
4933413B09RIK	5.97356	6.13581	5.83485	5.58421	5.90071	5.79069	5.80463	5.81112	5.95516
4933413G11RIK	5.76063	5.78442	5.55102	5.67859	5.60721	5.86864	5.43669	5.75496	5.45036
4933414E04RIK	5.81826	5.97979	6.50557	5.87642	5.92223	5.8712	5.92536	6.12363	5.7294
4933414G08	5.69477	6.1687	5.86796	6.13012	6.14784	6.27315	5.991	5.73163	5.48392
4933415F23RIK	5.70565	5.68229	6.02859	5.61699	5.65703	5.68588	5.70156	5.55316	5.5787
4933415L06RIK	5.61699	5.73796	6.16017	5.68648	5.83728	5.734	5.67777	5.91918	5.65641
4933416C03RIK	6.20397	6.41092	6.20973	6.03213	5.98551	6.03796	6.40314	6.47564	5.92664
4933416E05RIK	6.04397	5.98551	6.10311	5.83711	5.97823	5.90944	6.22302	6.18149	5.92743
4933417A18RIK	5.70143	5.73344	5.78824	6.00848	5.99943	5.76389	5.61185	5.84602	5.79058
4933417E01RIK	5.98115	6.1225	6.1773	6.00741	6.14405	5.9872	6.41538	6.20909	6.26899
4933417K04RIK	7.09262	7.19868	7.74996	6.34418	6.355	6.41257	6.31581	6.69307	6.62764
4933417K05RIK	5.72896	6.00487	5.75803	5.47943	5.58402	5.91331	5.29363	5.92652	5.67675
4933417L02RIK	6.21104	5.75405	5.59424	5.79473	5.60217	5.61975	5.67269	5.76906	5.43324
4933421E11RIK	7.34929	7.54274	7.81785	7.06766	7.02812	7.07837	7.09574	7.102	7.07935
4933421I07RIK	5.61682	5.80994	5.63221	5.67425	5.6364	5.52699	5.72095	6.03115	5.77233
4933422H20RIK	5.85287	5.7292	5.95535	5.67999	5.85796	5.72626	5.69906	5.62276	5.73563
4.93342e+23	5.75342	5.72574	6.17224	5.95299	5.9233	5.96672	6.33228	5.9093	5.84662
4933424A10RIK	5.53491	5.47213	5.49769	5.72031	5.81804	5.83131	6.0946	5.91692	5.87473
4933424B01RIK	9.07489	9.57392	9.16579	9.15605	9.12382	8.9971	9.25688	9.82575	9.33438
4933424F08RIK	6.10994	5.81185	6.23403	6.0146	6.17863	6.11555	6.45904	6.14759	6.1119
4933424M23RIK	11.606	11.5293	11.8685	11.2409	11.0782	11.0601	10.6103	11.2828	10.9538
4933424N09RIK	6.64271	6.77815	6.72842	6.63561	6.60468	6.66263	6.52108	6.94547	6.50484
4933425F06RIK	5.90457	5.53566	5.748	5.51617	5.55834	5.6431	5.38071	5.50652	5.69179
4933425I22RIK	8.41011	7.90539	7.75025	9.45781	9.19153	9.00522	8.77113	9.40239	8.79563
4933425K02RIK	5.74464	5.8064	5.74216	5.73912	5.68704	5.6995	5.85208	5.90887	5.69836
4933425L06RIK	5.73519	5.67467	5.61394	5.62214	5.58665	5.81401	6.02876	5.92921	5.8443
4933425M15RIK	5.77931	5.48216	5.70359	5.5976	5.35893	5.38832	5.80272	5.70806	5.63506
4933425O20RIK	5.78214	5.84562	5.79375	5.68633	5.79815	5.75276	5.77179	5.65059	5.46012
4933426L22RIK	5.98182	6.27262	6.4184	6.02859	6.03936	5.97694	6.19363	6.53855	6.39799
4933426M11RIK	8.40706	8.42974	8.0183	9.13292	8.80457	8.84454	8.19161	8.868	8.40706
4933427D06RIK	5.28034	5.21569	5.1321	5.20084	5.53168	5.1632	5.36618	5.59869	5.36618
4933427D14RIK	6.92924	8.09841	8.67023	8.18244	7.89732	7.88721	7.70381	8.19122	7.37972
4933427L07RIK	8.95359	8.82326	8.83852	8.65694	8.75566	8.69481	8.87165	8.92899	9.11255
4933428A15RIK	5.60739	5.66515	5.68679	5.65731	5.71419	5.63183	5.66951	5.57786	5.92669
4933428G09RIK	5.79756	5.82416	5.92545	6.14341	6.22998	6.22302	5.95563	6.14639	5.80291
4933428G20RIK	6.43242	5.89768	6.03984	6.10742	5.90985	6.06241	6.31451	6.3287	6.42763
4933428I03RIK	6.97865	6.90897	7.35398	6.39892	6.34219	6.33073	5.8048	6.16899	6.12723
4933428M03RIK	5.72842	5.76914	5.7296	5.75156	5.84998	5.79854	5.805	5.71953	5.84239
4933429E10RIK	5.77147	5.81774	5.96388	5.94237	5.81897	6.04914	6.03371	6.07141	5.9648
4933429F08RIK	6.04697	5.81348	6.29241	5.86797	5.74004	5.7042	5.85506	6.16046	6.22468
4933429I20RIK	5.88346	5.73174	5.91464	5.74857	5.72593	5.84461	5.49384	5.67874	5.72684
4933430F08RIK	6.08125	5.78841	6.10597	5.79494	5.86254	5.64786	5.94285	5.78654	6.15824
4933430I17RIK	5.64717	5.68315	5.64394	5.75099	5.85348	5.65295	5.86418	5.86538	5.96519
4933430J11	5.57984	5.72022	5.61691	5.97081	5.96414	5.92902	6.35167	6.21051	5.9567
4933432H23RIK	5.5914	5.56586	5.5613	5.60711	5.66668	5.6016	5.70611	5.67186	5.95806
4933432P15RIK	6.13173	6.28584	6.56242	6.05004	6.04643	5.97928	5.82399	6.02403	6.40073
4933433P14RIK	5.77825	5.71612	5.60201	5.78806	5.70371	5.63863	5.497	5.7651	5.60682
4933434E20RIK	8.71549	8.58743	8.95576	8.88764	8.77843	8.74833	8.88879	8.83392	8.68165
4933434G05RIK	5.97132	5.62711	5.92951	5.8019	5.89162	5.83174	5.85934	5.70171	5.91264
4933434I06RIK	5.85002	5.64721	5.49255	5.38071	5.44088	5.52568	5.59034	5.4996	5.70337
4933434I20RIK	5.66332	5.57226	5.86804	5.92644	6.06709	5.91888	6.16655	6.06351	6.34626
4933435A13RIK	7.04888	7.28425	7.48695	6.62621	6.71208	6.6347	6.82922	7.0103	6.88833
4933436I01RIK	5.86544	5.79903	5.69859	5.8978	5.77556	5.74166	5.74828	5.92301	5.77983
4933437F05RIK	5.70768	5.65882	5.51529	5.67732	5.45473	5.56049	5.48898	5.67114	5.78337
4933437K13RIK	5.48172	5.47503	5.5972	5.49905	5.556	5.55068	5.47563	5.74704	5.8475
4933439A12RIK	5.69057	5.79334	5.55834	5.73809	5.6431	5.90801	5.99272	5.75558	5.7
4933439C20RIK	10.4616	10.7898	10.54	10.2181	9.08829	9.99806	8.96875	10.1835	9.63341
4933439F18RIK	5.84123	5.87398	5.72689	5.63248	5.635	5.69233	5.84186	5.68768	5.75928
4933440H19RIK	5.97735	5.89546	5.75727	5.93622	6.05004	6.03379	6.23491	6.12184	6.13398
5031400M07RIK	6.43127	6.6269	6.23935	6.51401	6.49606	6.49493	6.30459	6.52481	6.54172
5031404N07	5.89142	5.9511	5.78686	5.80852	5.70252	5.68279	5.76572	6.26158	5.79246
5031408O05RIK	5.47764	5.68006	5.68482	5.58133	5.59902	5.72202	5.72831	5.70838	5.74832
5031410I06RIK	6.05185	6.10642	6.38267	5.81459	5.9149	5.87929	6.21104	5.67519	5.66437
5031414D18RIK	5.6903	5.6305	5.62956	5.92664	5.72085	5.84518	6.00629	5.70136	5.75136
5033405K12RIK	8.45956	8.73225	7.84813	8.60262	8.48734	8.7295	9.12177	8.72885	8.88361
5033406L14RIK	5.91644	6.10393	5.86817	6.30209	6.18668	6.28504	5.87781	5.96767	6.01304
5033413D22RIK	5.59161	5.52125	5.38437	5.95367	5.94482	5.90782	5.65617	5.74602	5.6431
5033413H12RIK	7.4937	7.3869	7.14475	7.41513	7.36733	7.53388	7.37561	7.22914	7.38624
5033414D02RIK	11.2191	11.2963	11.4883	10.6332	10.5973	10.5973	10.8531	10.9192	11.0139
5033425B17RIK	9.94274	9.84737	10.3471	9.84545	9.72358	9.98275	9.53624	9.86278	9.69665
5133400D11RIK	5.74082	5.47943	5.43625	5.59592	5.45104	5.34407	5.89301	5.55211	5.83363
5133400G04RIK	7.50299	7.54602	8.01543	7.23537	7.5055	7.569	7.89628	7.42274	7.79624
5133401N09RIK	7.83654	7.83401	7.97596	8.88654	8.76444	8.98843	8.36815	8.27908	8.36659
5230400G24RIK	7.34311	7.39204	7.44909	7.82869	7.81139	7.81945	7.83084	7.67738	7.66685
5230400J09RIK	6.01601	6.24392	5.90266	5.94377	6.03156	5.89432	5.77416	5.91255	5.85898
5330401P04RIK	7.86859	7.67874	8.2019	7.77828	7.67279	7.89511	7.22553	7.39677	7.64337
5330408M12RIK	6.05223	6.25168	6.22302	5.6278	5.6308	5.7939	5.62827	5.84161	5.73112
5330408N05RIK	6.4862	6.61598	6.43036	6.75478	6.83034	6.83482	6.82205	6.98277	6.67408
5330410G16RIK	5.91022	5.81893	5.68486	5.66242	5.50972	5.72153	5.55758	5.79598	5.53837
5330414D10RIK	10.0228	10.1114	9.94016	9.7834	9.3784	9.49866	9.02025	9.96073	9.76595
5330417C22RIK	5.74264	5.71278	5.82148	5.58225	5.65099	5.6044	5.33178	6.36356	5.92089
5330421F07RIK	5.75127	5.77039	5.86408	5.78509	5.82479	5.74908	5.89667	5.82026	5.91224
5330431N19RIK	6.88084	6.54621	6.57424	6.65522	6.82103	6.95336	6.93348	6.35323	6.61135
5330431N24RIK	5.73609	5.69859	5.60755	5.82955	5.82773	6.00331	5.8249	5.7455	5.78113
5330437I02RIK	5.72865	5.69682	5.93723	5.75326	5.61035	5.84055	5.61596	5.6493	5.70317
5330438E18RIK	5.97275	5.97869	5.84174	5.90443	6.02029	5.76767	5.69564	5.81082	5.91187
5330439B14RIK	5.47826	5.77518	5.66398	5.51565	5.52587	5.30535	5.55983	5.62411	5.70924
5330439C02RIK	5.77083	5.57462	5.66269	5.76596	5.73147	5.50117	5.6569	5.7968	5.86466
5330439J01RIK	5.77927	5.8706	5.79833	5.8979	5.85662	5.97833	5.75843	5.80291	5.72948
5330440M15RIK	7.20206	7.04937	7.13309	6.46882	6.46753	6.49998	6.47863	6.7302	6.27493
5430400N05RIK	8.12778	7.95637	7.1788	8.35766	8.07525	8.12832	7.91527	8.20109	8.17928
5430401O09RIK	6.27779	6.37777	6.79609	6.12873	6.07349	6.13387	6.19917	6.40012	6.09854
5430407P10RIK	5.62861	5.53754	5.42828	5.94649	5.82232	5.70263	5.45925	5.91125	5.71465
5430413I02RIK	5.89976	5.95685	6.46295	5.80923	6.04556	5.94468	6.62188	6.33776	6.38051
5430413K10RIK	5.75805	5.81303	5.70217	5.60898	5.7363	5.67191	5.66098	5.79258	5.69239
5430416O09RIK	5.88062	6.13551	5.72031	6.02642	6.08084	6.02163	5.58176	5.50944	5.62473
5430419D17RIK	5.83198	5.88521	5.76497	5.64602	5.53216	5.5427	5.53138	5.6799	5.41749
5430420C16RIK	5.75434	5.73602	5.89142	6.11456	6.09854	6.13581	5.89181	5.45527	5.38437
5430425C04RIK	5.75339	5.76532	5.6436	5.82869	5.8378	5.91422	5.73951	5.81988	6.05876
5430428G01RIK	7.60767	7.75688	7.97195	7.15124	7.60274	7.3634	7.31569	7.71834	7.19665
5430431G03RIK	6.01864	5.93141	6.18919	5.74747	5.66137	5.76063	5.8758	5.67999	5.67455
5430432M24RIK	6.68834	6.81798	6.73491	6.07854	6.16908	6.19187	6.54621	6.55033	6.61875
5430435G22RIK	6.24566	5.83043	5.89825	5.89432	5.92523	5.80599	6.10021	5.99416	6.01884
5430437P03RIK	8.68299	8.62592	9.12382	8.4079	8.62328	8.7139	9.43807	8.76017	9.0249
5430438H03RIK	6.20162	6.01905	6.55557	5.90233	6.04277	6.11084	6.49803	6.17688	6.02325
5430439G14RIK	5.73006	5.98943	6.21955	5.8241	5.76327	5.79531	5.69477	5.91153	5.90827
5530600A18RIK	7.02381	7.01601	7.1412	7.12472	7.37787	7.45183	7.41976	7.33466	7.36559
5530601I19RIK	7.93612	7.92905	8.40026	7.08852	7.07837	7.01535	6.58625	6.99232	7.42445
5630401D24RIK	6.04585	5.97073	5.96312	6.11425	6.08125	6.15177	6.1452	5.95272	5.93155
5730402C02RIK	5.99424	5.86701	6.05964	5.73884	5.76555	5.82909	5.80195	5.82929	5.85274
5730403M16RIK	7.28654	7.29657	7.36675	6.82948	6.81752	6.69642	7.2309	6.99966	7.10952
5730405M13RIK	6.13739	5.94392	5.64915	6.23654	6.29998	6.23959	6.33478	6.18961	6.00482
5730406I15RIK	6.64375	6.67839	6.14875	8.05071	8.10571	7.87632	7.16502	6.94693	7.10138
5730409E04RIK	5.45798	5.57616	5.69199	5.87947	5.78963	5.91231	5.93013	5.65523	5.80751
5730409F24RIK	6.86821	6.53818	6.38784	6.26827	6.11503	6.27976	6.41868	6.14908	6.30471
5730410E15RIK	5.8143	6.07273	5.65804	5.85158	5.83169	5.81344	5.65766	5.78379	5.80928
5730410I19RIK	8.85296	8.83305	8.59213	8.95687	9.11097	9.05851	9.12058	9.17928	9.22756
5730411O18RIK	5.52166	5.60211	5.68689	5.95415	5.93482	5.76568	6.13717	5.82042	5.88753
5730419I09RIK	8.10183	8.37457	8.46668	7.53388	7.71982	7.71783	8.07735	7.85418	8.38038
5730420B22RIK	5.8328	5.66302	5.68108	5.57004	5.79936	5.72256	5.78611	5.76605	5.79317
5730421E18RIK	5.75653	5.64651	5.71842	5.54726	5.61781	5.72694	5.82544	5.58824	5.7847
5730427C23RIK	5.83338	5.7169	5.57111	5.89729	5.80889	5.87812	5.76152	5.9177	5.52825
5730436H21RIK	7.96305	8.02093	8.31475	8.34054	8.39752	8.47337	8.17064	8.18501	8.16572
5730437N04RIK	10.2824	10.2442	10.2935	9.06925	9.32815	9.38975	9.58136	10.1681	9.86571
5730438N18RIK	6.19933	6.05876	6.24111	6.09189	6.12211	6.13145	6.22955	5.96544	5.96238
5730442P18RIK	5.57542	5.50638	5.49384	5.64511	5.41036	5.61074	5.63373	5.5561	5.29713
5730446C15RIK	6.9215	6.97408	6.51013	7.41686	7.18987	7.0685	6.57382	6.86943	6.82654
5730446D14RIK	5.79334	5.50863	5.82327	5.55093	5.56021	5.60133	5.55048	5.5812	5.73535
5730449L18RIK	8.32324	8.23008	8.24576	7.93663	8.44072	8.29989	8.73107	8.2795	8.61832
5730453H04RIK	5.97002	5.85907	5.75493	9.89012	10.7503	10.1972	7.22187	5.91614	5.68276
5730453I16RIK	10.0069	10.3721	10.4494	10.0541	9.81788	9.79113	8.89994	10.0386	9.96073
5730454B08RIK	6.20973	6.33805	6.17014	6.49647	6.46113	6.50428	6.16986	6.44589	6.50466
5730455A04RIK	5.61975	5.40432	5.40371	5.71045	5.88533	5.74971	6.14202	5.59635	5.91328
5730458D16RIK	6.25083	6.09388	6.11967	6.38693	6.52582	6.4907	6.78855	6.02282	6.08436
5730466C23RIK	7.22034	7.03246	7.02248	6.58355	6.52967	6.43685	6.90146	7.19274	6.71457
5730466H23RIK	9.30528	9.52182	9.63961	8.58494	8.61756	8.51114	8.87113	9.15605	8.97319
5730466P16RIK	9.45058	9.20848	8.89804	9.98787	10.1099	10.0655	9.74098	9.5682	9.56486
5730469D23RIK	6.30103	6.41784	6.29815	6.22161	6.1939	6.20759	5.93894	6.16409	6.25592
5730469M10RIK	6.10921	6.015	5.87828	6.01911	5.924	5.73147	5.61538	5.81564	5.95279
5730470L24RIK	5.70111	5.82495	5.63228	5.50019	5.55062	5.42948	5.63572	5.50221	5.53737
5730472N09RIK	7.44527	7.35448	7.48556	6.8376	6.95173	6.79781	7.10755	7.10167	7.35231
5730494M16RIK	8.56133	8.24632	8.411	8.55451	8.62637	8.59891	8.51554	9.04926	8.49135
5730494N06RIK	8.02093	8.45047	8.09463	8.20629	8.45334	8.32446	8.78176	8.40961	8.85412
5730507A09RIK	5.85391	5.87828	5.77279	5.77671	5.78337	5.71209	5.8448	5.74881	5.78957
5730508B09RIK	5.77698	5.79818	5.53754	5.88552	5.91576	5.85062	5.86931	6.17477	5.93789
5730509C05RIK	8.21263	8.33993	7.9674	8.86682	8.63147	8.84847	7.8107	8.14226	8.17615
5730509K17RIK	5.98435	6.1043	6.26513	6.33505	6.13707	6.20669	6.00948	5.8128	5.68816
5730521E12RIK	5.50436	5.91754	5.69244	5.54696	5.69935	5.47976	5.74629	5.60048	5.53289
5730528L13RIK	5.56121	5.44797	5.55385	6.24548	6.10299	6.00162	6.41505	6.11215	6.18659
5730536A07RIK	5.93743	5.81522	5.70111	5.83519	5.92447	5.85786	5.90181	5.98295	5.82601
5730537D05RIK	5.75318	5.66625	5.74594	5.71915	5.72598	5.72045	5.79513	5.80487	5.65855
5730538E15RIK	6.77815	6.7565	6.27822	7.14927	7.12423	6.97028	6.81984	7.13084	6.88573
5730555F13RIK	9.25071	9.51288	9.25903	9.82041	9.65586	9.61175	9.27592	9.52626	9.48335
5730568A12RIK	6.5029	6.51842	6.83346	6.90695	6.72678	6.90813	6.39341	6.61831	6.41396
5730577I03RIK	5.81948	5.75522	5.73259	5.79929	5.70165	5.66202	5.95003	5.8756	6.17956
5730578N08RIK	9.57605	9.55642	9.67903	8.88361	8.84148	8.7615	8.87274	9.28241	8.90202
5730589K01RIK	8.72217	8.53328	8.08126	8.48387	8.40706	8.3557	9.0403	9.0707	9.04524
5730589L02RIK	6.34088	6.3292	6.50792	6.10951	6.21431	6.25994	5.987	5.87239	6.31888
5730591C18RIK	5.58319	5.39839	5.87075	5.92434	6.03316	6.02452	6.31888	5.95895	6.01109
5730593F17RIK	9.61399	9.73288	9.93103	9.25446	9.04706	8.94337	9.2868	9.68439	9.50807
5730593N15RIK	5.80977	5.9929	5.88581	5.63277	5.59926	5.63376	5.80811	5.80876	5.78584
5730596K20RIK	6.82324	6.7775	6.85962	6.5908	6.64466	6.60999	7.04888	6.77673	6.8341
5730599I05RIK	7.64879	7.68131	7.98909	7.54961	7.62489	7.4217	7.6273	7.57286	7.45791
5830404H04RIK	7.06396	6.74529	6.77144	6.22369	6.3196	6.3142	6.34502	6.54678	6.42029
5830405N20RIK	10.3669	10.0113	9.86103	10.3669	10.3721	10.1609	9.99294	10.5785	10.6354
5830411K18RIK	9.53697	9.32436	9.90087	8.76328	9.18656	9.3516	9.78721	9.76595	10.1227
5830415F09RIK	7.00231	6.68729	7.25781	6.71633	6.64836	6.5903	6.86307	6.72763	6.7247
5830415L20RIK	8.23008	8.60231	7.90938	9.01014	8.70805	8.86032	7.91646	8.04549	8.11694
5830416A07RIK	9.25198	9.32217	9.06925	9.72536	9.49355	9.43229	9.04782	9.09938	8.96532
5830417C01RIK	6.97117	7.13309	7.02932	7.08637	7.19095	7.24454	7.01535	7.07763	6.88778
5830418K08RIK	5.52699	5.53405	5.90199	5.58906	5.80807	5.72896	5.68657	5.51318	5.67169
5830426I05RIK	6.99097	6.77177	6.88137	6.55379	7.15994	7.0007	7.50174	7.3573	7.25641
5830427D03RIK	8.04433	8.47394	8.66963	8.93596	8.68428	8.58193	7.24141	8.68104	8.21661
5830427H10RIK	9.93627	10.0013	9.99294	9.66624	9.63341	9.56356	9.52948	9.86103	9.54128
5830433M19RIK	6.70293	6.31841	6.87177	7.04458	6.99832	6.91132	6.75148	6.58511	6.71938
5830434P21RIK	10.3234	10.2698	10.3525	10.3378	10.1127	10.0372	9.7578	10.5042	10.315
5830435K17RIK	5.65801	5.84366	5.91658	6.10021	6.07594	5.93033	6.0699	6.23575	6.24125
5830436D01RIK	6.68439	7.00029	6.95278	6.49087	6.48333	6.57845	6.50953	6.637	6.8188
5830442J12RIK	5.94736	5.80623	5.87293	6.01985	6.05405	6.12939	6.24421	5.93367	5.88784
5830443L24RIK	5.95011	5.98612	5.975	5.48131	5.67176	5.60048	5.68362	5.42435	5.89558
5830457H20RIK	5.71866	5.47381	5.61465	5.47651	5.60403	5.53006	5.64375	5.71045	5.71379
5830457O10RIK	7.05795	7.21527	6.67908	6.86602	6.90183	6.86766	7.16224	7.1405	7.26678
5830461H18RIK	6.35347	6.5004	6.39851	5.95944	5.80223	5.76885	6.00848	6.3196	6.11012
5830467P10RIK	5.90204	5.74284	5.7829	5.78364	5.81199	5.75913	5.8432	5.93348	5.92428
5830468K18RIK	6.40629	7.11816	6.63489	6.61318	6.66612	6.73938	6.65162	6.30488	6.71311
5830472H07RIK	8.19201	8.30285	8.0816	8.8138	8.79876	8.5186	7.0854	8.53893	7.88593
5830472M02RIK	6.88531	6.9342	6.64561	6.89159	6.91084	6.80478	6.70147	6.94918	7.24454
5830482F20RIK	6.82379	6.71556	6.74674	8.25494	8.05118	8.24424	6.97391	6.66757	7.18277
5830482G23RIK	6.59459	6.70923	6.90052	6.20875	6.22533	6.13068	5.85687	6.25436	6.3572
5830483C08RIK	5.71201	5.89888	5.81696	5.47893	5.66762	5.66247	5.62822	5.85012	5.82656
5830484A20RIK	5.60194	5.43072	5.79629	6.40645	6.67178	6.60641	6.87628	6.5355	6.58209
5832418A03	5.61822	5.76075	5.77553	6.12828	5.90871	5.90383	5.73501	5.80237	5.75737
5832424M12	8.89774	8.86603	9.3002	8.87413	8.55734	8.50567	8.27833	9.21462	8.90838
5930405J04RIK	7.98501	8.07777	7.59563	8.09525	7.94041	7.91564	8.39939	8.17252	8.27617
5930412E23RIK	9.33643	9.00839	8.92962	8.90202	9.37379	9.07285	9.23244	8.92491	9.12145
5930416I19RIK	10.6437	10.7818	11.0754	10.3249	10.6584	10.5524	10.4616	10.7898	10.5992
5930431H10	6.15805	6.37269	5.78003	6.33396	6.25954	6.45395	6.36679	6.37884	6.36803
5930434B04RIK	7.0007	7.15608	6.78008	6.87476	6.94504	6.86486	6.83346	6.89009	6.77685
6030404E16RIK	5.90475	5.78692	5.73143	5.69199	5.71548	5.73228	5.68845	5.65195	6.05342
6030405A18RIK	5.88199	5.87392	5.55967	5.68961	5.6722	5.69969	5.57775	5.86554	5.97291
6030408B16RIK	6.1278	6.23035	6.33008	5.98059	5.96989	6.04179	5.91153	6.00793	5.87979
6030410K14RIK	5.84961	5.61023	5.7179	5.40156	5.49975	5.65065	5.45036	5.62617	5.60997
6030411F23RIK	5.73616	5.68802	5.53168	5.54882	5.61611	5.62667	5.76815	5.68011	5.76742
6030419C18RIK	5.84436	5.87642	6.05601	6.10854	6.14312	6.2582	6.1959	5.83502	6.06935
6030429G01RIK	5.793	5.8606	5.7703	5.80185	5.78135	5.77331	5.69545	5.69277	5.94339
6030441F14RIK	5.97252	6.0104	6.05651	5.65977	5.77499	5.85654	5.80994	5.83095	5.71316
6030443O07RIK	9.64156	9.81788	10.4413	8.95359	9.03244	8.82152	8.7209	9.33438	9.08982
6030446I19RIK	7.34618	7.11986	6.90209	6.80727	6.9954	6.81122	7.1452	6.98141	7.0558
6030446N20RIK	6.11669	5.93392	6.14231	5.84203	5.90181	5.89786	6.46113	6.17138	6.15772
6030457N17RIK	8.79368	8.76328	8.81	9.05392	9.15956	8.98583	9.28919	8.92708	8.86238
6030458C11RIK	6.65708	6.98141	6.90638	7.37189	7.51567	7.44026	6.85164	7.07798	6.83511
6030458H05	8.64683	8.41396	8.44033	7.87961	7.94292	8.06748	8.29252	8.32446	8.32023
6030463G20RIK	5.72289	5.78864	5.66731	6.02209	6.00413	6.04019	5.57542	6.14063	5.69231
[truncated: 16,119 more rows]
